# Supplementary material for: Squamous trans-differentiation of pancreatic cancer cells promotes stromal inflammation
Source: eLife. 2020 Apr 24;9:e53381. doi: 10.7554/eLife.53381 (PMC7200154; doi:10.7554/eLife.53381)
Supplement: Supplementary file 1. — Tab-1 (Group 1 genes): List of gene significantly upregulated in the Group 1 PSC cluster versus the Group 2 PSC cluster. Tab-2 (Group 2 genes): List of genes significantly upregulated in the Group 2 PSC cluster versus the Group 1 PSC cluster. Tab-3 (ranked Group 2 vs Group 1): Genes ranked by their mean log2 fold change in the Group 2 versus the Group 1 PSC cluster. [file elife-53381-supp1.xlsx]

## Sheet: Group 1 genes
gene_id	gene	locus	sample_1	sample_2	status	value_1	value_2	log2(fold_change)	test_stat	p_value	q_value	significant
Gprin3	Gprin3	chr6:59352460-59426290	Group1	Group2	OK	3.13073	0.183787	-4.0904	-5.85277	5e-05	0.000525737	yes
Nell2	Nell2	chr15:95219439-95528252	Group1	Group2	OK	2.25553	0.196621	-3.51997	-5.15002	5e-05	0.000525737	yes
Fbln7	Fbln7	chr2:128863931-128897034	Group1	Group2	OK	41.7294	4.24003	-3.29892	-11.3777	5e-05	0.000525737	yes
Ogn	Ogn	chr13:49464058-49652731	Group1	Group2	OK	13.4265	1.56787	-3.0982	-4.30271	5e-05	0.000525737	yes
Nov	Nov	chr15:54745927-54753761	Group1	Group2	OK	188.107	24.1508	-2.96141	-10.742	5e-05	0.000525737	yes
Plxna2	Plxna2	chr1:194619828-194816868	Group1	Group2	OK	3.23342	0.439881	-2.87788	-7.85606	5e-05	0.000525737	yes
Sfrp4	Sfrp4	chr13:19623174-19632823	Group1	Group2	OK	21.9643	3.39681	-2.69291	-7.66601	5e-05	0.000525737	yes
Ctla2a	Ctla2a	chr13:60934154-60936625	Group1	Group2	OK	7.91611	1.2299	-2.68626	-5.22367	5e-05	0.000525737	yes
Wfdc17	Wfdc17	chr11:83704055-83706269	Group1	Group2	OK	17.3854	2.72478	-2.67366	-3.66127	5e-05	0.000525737	yes
Fxyd1	Fxyd1	chr7:31051677-31055656	Group1	Group2	OK	4.4728	0.732811	-2.60967	-2.6042	5e-05	0.000525737	yes
Esm1	Esm1	chr13:113209658-113218104	Group1	Group2	OK	4.06494	0.671818	-2.59709	-4.79951	5e-05	0.000525737	yes
Col28a1	Col28a1	chr6:7997807-8192617	Group1	Group2	OK	67.7248	11.2932	-2.58423	-10.2938	5e-05	0.000525737	yes
Pcdh10	Pcdh10	chr3:45378397-45434579	Group1	Group2	OK	20.55	3.73863	-2.45856	-8.68469	5e-05	0.000525737	yes
Prss23	Prss23	chr7:89507784-89517586	Group1	Group2	OK	49.0636	9.46251	-2.37436	-9.713	5e-05	0.000525737	yes
Tnfsf8	Tnfsf8	chr4:63832823-63861284	Group1	Group2	OK	5.11682	1.00223	-2.35203	-4.64068	5e-05	0.000525737	yes
Cfh	Cfh	chr1:140085854-140183411	Group1	Group2	OK	25.4688	5.09715	-2.32097	-9.31466	5e-05	0.000525737	yes
Dhrs3	Dhrs3	chr4:144892826-144927645	Group1	Group2	OK	150.675	32.0721	-2.23205	-9.28522	5e-05	0.000525737	yes
Gabra3	Gabra3	chrX:72432675-72656246	Group1	Group2	OK	29.3033	6.86971	-2.09274	-8.68287	5e-05	0.000525737	yes
Agap2	Agap2	chr10:127078906-127093170	Group1	Group2	OK	3.92864	0.922019	-2.09116	-5.76104	5e-05	0.000525737	yes
Scn7a	Scn7a	chr2:66673425-66784910	Group1	Group2	OK	3.53024	0.838234	-2.07434	-5.75771	5e-05	0.000525737	yes
Rgs4	Rgs4	chr1:169741476-169747642	Group1	Group2	OK	16.4833	4.02384	-2.03436	-6.82763	5e-05	0.000525737	yes
Gpx3	Gpx3	chr11:54902853-54910382	Group1	Group2	OK	13.6838	3.36731	-2.02279	-5.08131	5e-05	0.000525737	yes
Npr3	Npr3	chr15:11839895-11907371	Group1	Group2	OK	3.92237	0.982926	-1.99657	-5.8633	5e-05	0.000525737	yes
Sprr1a	Sprr1a	chr3:92483953-92485881	Group1	Group2	OK	98.8471	24.8773	-1.99037	-7.24207	5e-05	0.000525737	yes
Clu	Clu	chr14:65968482-65981548	Group1	Group2	OK	82.0689	20.8469	-1.977	-8.24958	5e-05	0.000525737	yes
Cpxm1	Cpxm1	chr2:130390774-130397629	Group1	Group2	OK	111.778	28.5124	-1.97098	-8.80134	5e-05	0.000525737	yes
Cthrc1	Cthrc1	chr15:39076931-39087119	Group1	Group2	OK	11.4239	2.91935	-1.96834	-4.39761	5e-05	0.000525737	yes
Igf1	Igf1	chr10:87858264-87937047	Group1	Group2	OK	14.5888	3.79486	-1.94274	-6.94236	5e-05	0.000525737	yes
Acta2	Acta2	chr19:34240335-34255373	Group1	Group2	OK	241.637	62.9993	-1.93943	-7.68708	5e-05	0.000525737	yes
Sfrp1	Sfrp1	chr8:23411501-23449632	Group1	Group2	OK	41.0713	11.4825	-1.8387	-7.17355	5e-05	0.000525737	yes
Osr2	Osr2	chr15:35296111-35303305	Group1	Group2	OK	4.57638	1.29357	-1.82285	-3.37671	5e-05	0.000525737	yes
Hic1	Hic1	chr11:75164564-75170255	Group1	Group2	OK	17.5744	4.9868	-1.81729	-6.77734	5e-05	0.000525737	yes
Dynlt1c	Dynlt1c	chr17:6646605-6655939	Group1	Group2	OK	4.72369	1.34204	-1.81549	-2.57806	0.0001	0.000990466	yes
Alpl	Alpl	chr4:137741730-137796384	Group1	Group2	OK	4.24156	1.20683	-1.81337	-3.95006	5e-05	0.000525737	yes
Ccl9	Ccl9	chr11:83572916-83578636	Group1	Group2	OK	5.60991	1.61508	-1.79637	-4.5986	5e-05	0.000525737	yes
Tmtc2	Tmtc2	chr10:105187663-105574479	Group1	Group2	OK	14.0209	4.08259	-1.78002	-7.08193	5e-05	0.000525737	yes
Il1f10	Il1f10	chr2:24291195-24293820	Group1	Group2	OK	2.94199	0.870415	-1.75702	-1.92642	0.00115	0.00844045	yes
Cdh3	Cdh3	chr8:106510851-106556911	Group1	Group2	OK	2.05177	0.621466	-1.72312	-3.63746	5e-05	0.000525737	yes
Col11a1	Col11a1	chr3:114030539-114220756	Group1	Group2	OK	7.41591	2.27981	-1.70171	-6.51839	5e-05	0.000525737	yes
Sulf1	Sulf1	chr1:12692429-12860372	Group1	Group2	OK	33.9147	10.5393	-1.68613	-7.47273	5e-05	0.000525737	yes
Tgm2	Tgm2	chr2:158116404-158146392	Group1	Group2	OK	35.9091	11.3591	-1.66051	-7.13869	5e-05	0.000525737	yes
Adamts1	Adamts1	chr16:85793827-85803113	Group1	Group2	OK	83.5081	26.4628	-1.65795	-6.61174	5e-05	0.000525737	yes
Fabp7	Fabp7	chr10:57784922-57788450	Group1	Group2	OK	4.06851	1.29739	-1.64889	-2.45744	5e-05	0.000525737	yes
Stbd1	Stbd1	chr5:92603050-92606579	Group1	Group2	OK	16.8706	5.49707	-1.61778	-5.3225	5e-05	0.000525737	yes
Pparg	Pparg	chr6:115360950-115490401	Group1	Group2	OK	5.91713	1.94842	-1.60259	-3.70189	5e-05	0.000525737	yes
Tll1	Tll1	chr8:64014769-64205993	Group1	Group2	OK	2.33393	0.769649	-1.60049	-3.81304	5e-05	0.000525737	yes
Arsi	Arsi	chr18:60912239-60917768	Group1	Group2	OK	5.43695	1.80934	-1.58734	-3.50765	5e-05	0.000525737	yes
Myo5b	Myo5b	chr18:74442618-74771477	Group1	Group2	OK	5.42841	1.80905	-1.5853	-5.46712	5e-05	0.000525737	yes
Hpgd	Hpgd	chr8:56294551-56321046	Group1	Group2	OK	2.84855	0.957442	-1.57297	-2.56585	0.0001	0.000990466	yes
Cd24a	Cd24a	chr10:43579168-43584265	Group1	Group2	OK	28.7	9.68189	-1.56769	-5.87368	5e-05	0.000525737	yes
Cntfr	Cntfr	chr4:41657497-41697091	Group1	Group2	OK	7.33328	2.48441	-1.56156	-4.00744	5e-05	0.000525737	yes
Pgap1	Pgap1	chr1:54472999-54557684	Group1	Group2	OK	2.40502	0.824259	-1.54488	-4.8808	5e-05	0.000525737	yes
Map3k7cl	Map3k7cl	chr16:87553329-87595336	Group1	Group2	OK	25.5525	8.839	-1.53151	-5.41131	5e-05	0.000525737	yes
Adamts5	Adamts5	chr16:85858156-85901125	Group1	Group2	OK	55.678	19.3904	-1.52176	-6.14242	5e-05	0.000525737	yes
Tagln	Tagln	chr9:45863424-45936058	Group1	Group2	OK	370.419	129.228	-1.51924	-4.71115	5e-05	0.000525737	yes
Anxa8	Anxa8	chr14:34051129-34102754	Group1	Group2	OK	2.17553	0.768224	-1.50177	-2.36117	5e-05	0.000525737	yes
Adamts12	Adamts12	chr15:11064789-11346867	Group1	Group2	OK	2.95117	1.04432	-1.49872	-4.28729	5e-05	0.000525737	yes
S100a16	S100a16	chr3:90541222-90543151	Group1	Group2	OK	25.6554	9.08872	-1.49711	-4.58913	5e-05	0.000525737	yes
Sprr2b	Sprr2b	chr3:92316704-92318085	Group1	Group2	OK	5.78468	2.04984	-1.49672	-2.35481	5e-05	0.000525737	yes
Efemp1	Efemp1	chr11:28853204-28926743	Group1	Group2	OK	210.428	74.6531	-1.49505	-6.53099	5e-05	0.000525737	yes
Syt13	Syt13	chr2:92915100-92956051	Group1	Group2	OK	2.54045	0.901818	-1.49418	-3.33503	5e-05	0.000525737	yes
Cldn15	Cldn15	chr5:136967868-136975845	Group1	Group2	OK	2.94509	1.06157	-1.47211	-2.67576	5e-05	0.000525737	yes
Cebpa	Cebpa	chr7:35119292-35121931	Group1	Group2	OK	2.50927	0.906934	-1.4682	-2.99691	5e-05	0.000525737	yes
Col3a1	Col3a1	chr1:45311537-45349706	Group1	Group2	OK	910.921	331.2	-1.45962	-2.437	0.00015	0.00142439	yes
Ctgf	Ctgf	chr10:24595441-24598682	Group1	Group2	OK	46.0406	16.7418	-1.45945	-6.3482	5e-05	0.000525737	yes
Adam22	Adam22	chr5:8072346-8368160	Group1	Group2	OK	2.76986	1.01787	-1.44426	-3.01097	5e-05	0.000525737	yes
Nrep	Nrep	chr18:33437018-33464029	Group1	Group2	OK	15.4708	5.70083	-1.44031	-4.66375	5e-05	0.000525737	yes
Rarres1	Rarres1	chr3:67478885-67515523	Group1	Group2	OK	8.23386	3.03991	-1.43754	-3.37744	5e-05	0.000525737	yes
Cnn1	Cnn1	chr9:22099252-22109221	Group1	Group2	OK	21.9786	8.13824	-1.43331	-5.25821	5e-05	0.000525737	yes
Atp1b2	Atp1b2	chr11:69599749-69605960	Group1	Group2	OK	12.9591	4.82176	-1.42633	-5.09706	5e-05	0.000525737	yes
Dpysl3	Dpysl3	chr18:43320978-43438286	Group1	Group2	OK	28.518	10.6795	-1.41703	-6.25421	5e-05	0.000525737	yes
Abi3bp	Abi3bp	chr16:56477845-56690135	Group1	Group2	OK	36.6835	13.857	-1.40451	-5.87233	5e-05	0.000525737	yes
Adgrb2	Adgrb2	chr4:129984869-130022633	Group1	Group2	OK	3.25905	1.24681	-1.38622	-3.88363	5e-05	0.000525737	yes
Fzd8	Fzd8	chr18:9212855-9216201	Group1	Group2	OK	19.3054	7.47681	-1.36851	-5.58886	5e-05	0.000525737	yes
Wbscr17	Wbscr17	chr5:130874950-131307522	Group1	Group2	OK	3.80297	1.48712	-1.3546	-3.69743	5e-05	0.000525737	yes
Gria4	Gria4	chr9:4417892-4796234	Group1	Group2	OK	8.90956	3.48591	-1.35382	-4.49183	5e-05	0.000525737	yes
Gabre	Gabre	chrX:72257431-72274721	Group1	Group2	OK	16.1549	6.34689	-1.34785	-5.07755	5e-05	0.000525737	yes
Klhl13	Klhl13	chrX:23219270-23365082	Group1	Group2	OK	3.95885	1.57509	-1.32965	-3.44479	5e-05	0.000525737	yes
Col12a1	Col12a1	chr9:79598986-79718722	Group1	Group2	OK	13.6685	5.50736	-1.31143	-5.86867	5e-05	0.000525737	yes
Enpp3	Enpp3	chr10:24773813-24836195	Group1	Group2	OK	4.02912	1.62378	-1.31111	-3.25731	5e-05	0.000525737	yes
Limch1	Limch1	chr5:66745839-67057159	Group1	Group2	OK	3.42466	1.38278	-1.30839	-3.94025	5e-05	0.000525737	yes
Lama2	Lama2	chr10:26981284-27616942	Group1	Group2	OK	10.9938	4.44543	-1.3063	-5.79208	5e-05	0.000525737	yes
Gfra1	Gfra1	chr19:58235580-58455398	Group1	Group2	OK	9.28257	3.75934	-1.30405	-4.82241	5e-05	0.000525737	yes
Il4ra	Il4ra	chr7:125552281-125579474	Group1	Group2	OK	178.187	72.545	-1.29645	-4.72015	5e-05	0.000525737	yes
Pdgfd	Pdgfd	chr9:6168611-6377519	Group1	Group2	OK	3.81437	1.56306	-1.28707	-2.66817	5e-05	0.000525737	yes
Podxl2	Podxl2	chr6:88842557-88874044	Group1	Group2	OK	6.5877	2.70246	-1.2855	-3.32676	5e-05	0.000525737	yes
Spon2	Spon2	chr5:33213517-33218238	Group1	Group2	OK	21.9803	9.06288	-1.27817	-4.85517	5e-05	0.000525737	yes
Notch3	Notch3	chr17:32120892-32166852	Group1	Group2	OK	14.2936	5.90666	-1.27495	-5.76797	5e-05	0.000525737	yes
Heg1	Heg1	chr16:33684465-33768195	Group1	Group2	OK	44.5443	18.4614	-1.27073	-5.84094	5e-05	0.000525737	yes
Deptor	Deptor	chr15:55112316-55259273	Group1	Group2	OK	7.90839	3.31191	-1.25572	-5.15408	5e-05	0.000525737	yes
Lmod1	Lmod1	chr1:135324812-135368065	Group1	Group2	OK	3.29219	1.39041	-1.24354	-3.28368	5e-05	0.000525737	yes
Rasl11a	Rasl11a	chr5:146845070-146847726	Group1	Group2	OK	159.622	67.5545	-1.24054	-5.47617	5e-05	0.000525737	yes
Arxes2	Arxes2	chrX:135993819-135995359	Group1	Group2	OK	17.594	7.44771	-1.24022	-4.02048	5e-05	0.000525737	yes
Elavl2	Elavl2	chr4:91250766-91399984	Group1	Group2	OK	5.53756	2.35807	-1.23164	-3.74701	5e-05	0.000525737	yes
Sema4g	Sema4g	chr19:44989343-45003395	Group1	Group2	OK	3.54293	1.51767	-1.22308	-3.39398	5e-05	0.000525737	yes
Pcdh9	Pcdh9	chr14:93013699-93890669	Group1	Group2	OK	16.3925	7.05121	-1.2171	-5.40726	5e-05	0.000525737	yes
Nrn1	Nrn1	chr13:36725621-36734477	Group1	Group2	OK	39.2691	16.9002	-1.21635	-4.91444	5e-05	0.000525737	yes
Id3	Id3	chr4:136143821-136145392	Group1	Group2	OK	210.197	90.5633	-1.21474	-5.19132	5e-05	0.000525737	yes
Fhl1	Fhl1	chrX:56731760-56793346	Group1	Group2	OK	62.7613	27.1314	-1.20991	-5.42732	5e-05	0.000525737	yes
Tgfbi	Tgfbi	chr13:56609602-56639339	Group1	Group2	OK	107.895	46.9682	-1.19987	-4.9704	5e-05	0.000525737	yes
Fibin	Fibin	chr2:110360924-110362993	Group1	Group2	OK	5.74979	2.51851	-1.19094	-2.8345	5e-05	0.000525737	yes
Serinc2	Serinc2	chr4:130253496-130275586	Group1	Group2	OK	3.22524	1.41469	-1.18892	-2.44168	5e-05	0.000525737	yes
Cfap100	Cfap100	chr6:90403735-90428480	Group1	Group2	OK	8.06787	3.54396	-1.18683	-3.38013	5e-05	0.000525737	yes
Myl9	Myl9	chr2:156775463-156781657	Group1	Group2	OK	225.539	99.2779	-1.18383	-5.42232	5e-05	0.000525737	yes
Smpdl3a	Smpdl3a	chr10:57794543-57811830	Group1	Group2	OK	3.01259	1.33698	-1.17203	-2.32929	5e-05	0.000525737	yes
Fam150a	Fam150a	chr1:6359330-6394731	Group1	Group2	OK	10.2596	4.57558	-1.16494	-2.54601	5e-05	0.000525737	yes
Serpina3n	Serpina3n	chr12:104406707-104414329	Group1	Group2	OK	367.666	164.384	-1.16133	-4.43047	5e-05	0.000525737	yes
Rarb	Rarb	chr14:16430839-17082331	Group1	Group2	OK	12.1241	5.42548	-1.16006	-4.18403	5e-05	0.000525737	yes
Lgr6	Lgr6	chr1:134986352-135105276	Group1	Group2	OK	4.77567	2.14761	-1.15297	-3.3281	5e-05	0.000525737	yes
St6galnac2	St6galnac2	chr11:116676704-116694660	Group1	Group2	OK	3.36326	1.52971	-1.1366	-2.45168	5e-05	0.000525737	yes
Npy1r	Npy1r	chr8:66697421-66706798	Group1	Group2	OK	12.8217	5.8389	-1.13482	-3.91874	5e-05	0.000525737	yes
Id1	Id1	chr2:152736250-152737410	Group1	Group2	OK	26.4583	12.1053	-1.12809	-3.41035	5e-05	0.000525737	yes
Olfm2	Olfm2	chr9:20667985-20728214	Group1	Group2	OK	3.25198	1.48812	-1.12782	-2.18131	0.0001	0.000990466	yes
Podn	Podn	chr4:108014792-108032090	Group1	Group2	OK	3.53398	1.62835	-1.11788	-2.78252	5e-05	0.000525737	yes
Calml4	Calml4	chr9:62858103-62875917	Group1	Group2	OK	7.28745	3.35966	-1.1171	-2.11745	5e-05	0.000525737	yes
Angpt4	Angpt4	chr2:151911331-151944654	Group1	Group2	OK	5.84722	2.69751	-1.11612	-2.51101	5e-05	0.000525737	yes
Snca	Snca	chr6:60731572-60829855	Group1	Group2	OK	4.16731	1.92661	-1.11305	-2.13958	0.0001	0.000990466	yes
Enho	Enho	chr4:41569793-41640302	Group1	Group2	OK	3.43855	1.59269	-1.11033	-1.96551	0.00025	0.00224223	yes
Gpc6	Gpc6	chr14:116925296-117979529	Group1	Group2	OK	14.5994	6.76337	-1.11009	-4.72818	5e-05	0.000525737	yes
Nrp1	Nrp1	chr8:128359072-128505475	Group1	Group2	OK	28.2873	13.2671	-1.0923	-4.959	5e-05	0.000525737	yes
Itga11	Itga11	chr9:62677854-62783979	Group1	Group2	OK	2.67234	1.25943	-1.08533	-2.92376	5e-05	0.000525737	yes
Vcan	Vcan	chr13:89655309-89742512	Group1	Group2	OK	134.445	63.3671	-1.08521	-3.14901	5e-05	0.000525737	yes
Tinagl1	Tinagl1	chr4:130165599-130175122	Group1	Group2	OK	59.2957	27.9702	-1.08403	-4.91186	5e-05	0.000525737	yes
Klra18	Klra18	chr6:129972081-130386874	Group1	Group2	OK	38.2766	18.1427	-1.07707	-3.52937	5e-05	0.000525737	yes
Gadd45g	Gadd45g	chr13:51846674-51848474	Group1	Group2	OK	65.7386	31.2093	-1.07477	-4.49057	5e-05	0.000525737	yes
Rdh10	Rdh10	chr1:16105881-16132550	Group1	Group2	OK	105.702	50.2843	-1.07182	-4.4103	5e-05	0.000525737	yes
Cyp2d22	Cyp2d22	chr15:82370526-82380260	Group1	Group2	OK	14.705	6.99981	-1.07092	-4.07741	5e-05	0.000525737	yes
Tbc1d16	Tbc1d16	chr11:119143042-119228499	Group1	Group2	OK	3.00401	1.43698	-1.06385	-3.3867	5e-05	0.000525737	yes
Scara3	Scara3	chr14:65919394-65953744	Group1	Group2	OK	52.4764	25.1151	-1.06311	-4.89267	5e-05	0.000525737	yes
Slco2a1	Slco2a1	chr9:103008488-103087849	Group1	Group2	OK	50.2061	24.1265	-1.05724	-4.82079	5e-05	0.000525737	yes
Tmem44	Tmem44	chr16:30511854-30550578	Group1	Group2	OK	2.08026	1.00303	-1.05241	-2.50217	5e-05	0.000525737	yes
Gda	Gda	chr19:21391306-21472661	Group1	Group2	OK	52.6035	25.3995	-1.05036	-4.66331	5e-05	0.000525737	yes
Cpz	Cpz	chr5:35502217-35525626	Group1	Group2	OK	2.67106	1.29116	-1.04874	-2.17502	5e-05	0.000525737	yes
Col4a5	Col4a5	chrX:141475418-141689235	Group1	Group2	OK	30.8949	15.0298	-1.03954	-4.82065	5e-05	0.000525737	yes
Fbxl7	Fbxl7	chr15:26540458-26895564	Group1	Group2	OK	3.86783	1.88171	-1.03948	-3.0878	5e-05	0.000525737	yes
Fap	Fap	chr2:62500935-62574021	Group1	Group2	OK	12.9616	6.30884	-1.0388	-3.82664	5e-05	0.000525737	yes
Ebf4	Ebf4	chr2:130295938-130370481	Group1	Group2	OK	8.66911	4.24569	-1.02988	-3.34745	5e-05	0.000525737	yes
Kazald1	Kazald1	chr19:45076138-45079289	Group1	Group2	OK	6.37928	3.12722	-1.02851	-2.37499	5e-05	0.000525737	yes
Mfap4	Mfap4	chr11:61485443-61488704	Group1	Group2	OK	2.30489	1.13534	-1.02157	-1.77354	0.00045	0.00373562	yes
Tusc1	Tusc1	chr4:93334147-93335511	Group1	Group2	OK	20.0914	9.92072	-1.01806	-3.38389	5e-05	0.000525737	yes
Prkg1	Prkg1	chr19:30564486-31765033	Group1	Group2	OK	5.34826	2.65156	-1.01223	-1.79178	0.00155	0.0108778	yes
Megf10	Megf10	chr18:57133089-57297467	Group1	Group2	OK	2.06473	1.02659	-1.0081	-2.87501	5e-05	0.000525737	yes
Smarca1	Smarca1	chrX:47809369-47892552	Group1	Group2	OK	2.09829	1.04385	-1.00731	-2.38813	5e-05	0.000525737	yes
Pfkfb3	Pfkfb3	chr2:11471430-11553929	Group1	Group2	OK	20.7471	10.3456	-1.0039	-4.42959	5e-05	0.000525737	yes

## Sheet: Group 2 genes
gene_id	gene	locus	sample_1	sample_2	status	value_1	value_2	log2(fold_change)	test_stat	p_value	q_value	significant
Ces1a	Ces1a	chr8:93020214-93048192	Group1	Group2	OK	0.0753434	2.41563	5.00277	4.42004	0.0005	0.00409829	yes
Il6	Il6	chr5:30013113-30019975	Group1	Group2	OK	13.3966	231.034	4.10817	13.6346	5e-05	0.000525737	yes
Slpi	Slpi	chr2:164354069-164356507	Group1	Group2	OK	0.775964	12.8299	4.04738	5.78441	5e-05	0.000525737	yes
Oas3	Oas3	chr5:120753097-120777659	Group1	Group2	OK	0.579255	9.54208	4.04203	9.25808	5e-05	0.000525737	yes
Csf2	Csf2	chr11:54247269-54249899	Group1	Group2	OK	0.150292	2.29784	3.93443	3.53694	0.0006	0.00481377	yes
Cbr2	Cbr2	chr11:120729484-120732021	Group1	Group2	OK	0.149998	2.23121	3.89481	3.5852	0.0008	0.00618499	yes
Csf3	Csf3	chr11:98701312-98703629	Group1	Group2	OK	5.13124	60.6559	3.56327	9.79424	5e-05	0.000525737	yes
Cxcl1	Cxcl1	chr5:90891244-90893115	Group1	Group2	OK	89.5871	1010.57	3.49573	11.1764	5e-05	0.000525737	yes
Lif	Lif	chr11:4257567-4272514	Group1	Group2	OK	5.25067	59.0792	3.49208	12.6583	5e-05	0.000525737	yes
Saa2	Saa2	chr7:46751832-46754314	Group1	Group2	OK	0.203644	2.27213	3.47992	2.68949	0.00695	0.0380232	yes
Penk	Penk	chr4:4133535-4138445	Group1	Group2	OK	0.950522	10.534	3.47019	6.27531	5e-05	0.000525737	yes
Ism1	Ism1	chr2:139678177-139758581	Group1	Group2	OK	0.472812	5.17139	3.45121	6.49528	5e-05	0.000525737	yes
Cxcl2	Cxcl2	chr5:90903898-90905938	Group1	Group2	OK	1.61435	16.8953	3.3876	6.58454	5e-05	0.000525737	yes
Mx1	Mx1	chr16:97447034-97462906	Group1	Group2	OK	0.567508	5.79313	3.35163	6.58678	5e-05	0.000525737	yes
Il1rl1	Il1rl1	chr1:40429569-40465414	Group1	Group2	OK	15.4495	152.011	3.29854	11.4927	5e-05	0.000525737	yes
Ifi44	Ifi44	chr3:151730922-151749959	Group1	Group2	OK	6.64749	62.0983	3.22367	11.5443	5e-05	0.000525737	yes
Lcn2	Lcn2	chr2:32384636-32387739	Group1	Group2	OK	79.2137	690.045	3.12287	10.3808	5e-05	0.000525737	yes
Oas2	Oas2	chr5:120730332-120749848	Group1	Group2	OK	4.17601	35.3651	3.08213	10.6821	5e-05	0.000525737	yes
Cxcl3	Cxcl3	chr5:90786100-90788093	Group1	Group2	OK	1.19548	9.83578	3.04045	5.16759	5e-05	0.000525737	yes
Cmpk2	Cmpk2	chr12:26469214-26479837	Group1	Group2	OK	1.52879	12.0389	2.97725	8.05872	5e-05	0.000525737	yes
Ifit3	Ifit3	chr19:34583528-34588982	Group1	Group2	OK	7.94885	61.8814	2.96069	10.1332	5e-05	0.000525737	yes
Sprr2h	Sprr2h	chr3:92385684-92387319	Group1	Group2	OK	0.302511	2.33973	2.95128	2.89469	0.00045	0.00373562	yes
Ifit3b	Ifit3b	chr19:34607956-34613401	Group1	Group2	OK	1.88803	14.1337	2.90418	7.04172	5e-05	0.000525737	yes
Saa3	Saa3	chr7:46711997-46715676	Group1	Group2	OK	3940.58	27805.4	2.81888	2.5839	5e-05	0.000525737	yes
Gm12250	Gm12250	chr11:58183842-58190198	Group1	Group2	OK	0.713848	4.84394	2.76249	5.56962	5e-05	0.000525737	yes
Rsad2	Rsad2	chr12:26442742-26456452	Group1	Group2	OK	2.79423	18.9494	2.76163	9.13945	5e-05	0.000525737	yes
Slc39a4	Slc39a4	chr15:76612382-76616852	Group1	Group2	OK	0.513455	3.42373	2.73726	4.82307	5e-05	0.000525737	yes
Batf	Batf	chr12:85686719-85709087	Group1	Group2	OK	0.355105	2.32982	2.7139	2.88085	0.00015	0.00142439	yes
Lum	Lum	chr10:97565500-97572703	Group1	Group2	OK	4.18246	26.6788	2.67327	8.19237	5e-05	0.000525737	yes
S100a8	S100a8	chr3:90669070-90670034	Group1	Group2	OK	1.08732	6.86844	2.65921	2.65398	0.0005	0.00409829	yes
Apod	Apod	chr16:31296191-31314808	Group1	Group2	OK	0.392976	2.44915	2.63977	4.06451	5e-05	0.000525737	yes
Syt7	Syt7	chr19:10389089-10453181	Group1	Group2	OK	0.771173	4.57585	2.56891	7.03305	5e-05	0.000525737	yes
Atp8b4	Atp8b4	chr2:126320972-126491553	Group1	Group2	OK	0.369641	2.18665	2.56453	5.36999	5e-05	0.000525737	yes
Camp	Camp	chr9:109847376-109849456	Group1	Group2	OK	2.14317	12.5869	2.55411	3.97531	5e-05	0.000525737	yes
Irf7	Irf7	chr7:141263182-141266424	Group1	Group2	OK	30.5955	179.443	2.55213	9.58909	5e-05	0.000525737	yes
Cck	Cck	chr9:121489823-121495694	Group1	Group2	OK	0.842717	4.93431	2.54973	3.11114	5e-05	0.000525737	yes
Cfb	Cfb	chr17:34856373-34862514	Group1	Group2	OK	13.307	77.7431	2.54653	10.5839	5e-05	0.000525737	yes
Saa1	Saa1	chr7:46740498-46742980	Group1	Group2	OK	0.931541	5.41127	2.53828	3.02404	0.0001	0.000990466	yes
Ptgs2	Ptgs2	chr1:150100030-150108234	Group1	Group2	OK	29.6953	165.026	2.47439	8.44777	5e-05	0.000525737	yes
Oas1a	Oas1a	chr5:120896256-120907525	Group1	Group2	OK	6.43451	35.6915	2.47168	8.37593	5e-05	0.000525737	yes
Ccl2	Ccl2	chr11:82035576-82037452	Group1	Group2	OK	354.456	1959.02	2.46646	8.71758	5e-05	0.000525737	yes
Oas1g	Oas1g	chr5:120876141-120887613	Group1	Group2	OK	2.18184	12.029	2.46289	6.22905	5e-05	0.000525737	yes
Upp1	Upp1	chr11:9118007-9136170	Group1	Group2	OK	1.07776	5.71034	2.40554	4.29689	5e-05	0.000525737	yes
Stc1	Stc1	chr14:69029288-69041401	Group1	Group2	OK	1.18315	6.24297	2.39959	6.17175	5e-05	0.000525737	yes
Ccl5	Ccl5	chr11:83525778-83530518	Group1	Group2	OK	64.2639	338.257	2.39604	9.67582	5e-05	0.000525737	yes
H2-Q8	H2-Q8	chr17:35424846-35428361	Group1	Group2	OK	9.49341	48.9934	2.36759	7.31174	5e-05	0.000525737	yes
Apol9b	Apol9b	chr15:77729071-77736382	Group1	Group2	OK	11.8722	60.6765	2.35355	8.80108	5e-05	0.000525737	yes
Igfbp2	Igfbp2	chr1:72824479-72852471	Group1	Group2	OK	2.29015	11.1215	2.27983	4.60443	5e-05	0.000525737	yes
Mmp9	Mmp9	chr2:164948218-164955849	Group1	Group2	OK	1.17766	5.56871	2.24141	5.50622	5e-05	0.000525737	yes
H2-T23	H2-T23	chr17:36029976-36032701	Group1	Group2	OK	16.4455	77.1512	2.22999	8.64487	5e-05	0.000525737	yes
Cxcl5	Cxcl5	chr5:90759297-90761625	Group1	Group2	OK	218.604	1016.57	2.21732	5.69904	5e-05	0.000525737	yes
Gbp3	Gbp3	chr3:142560051-142573212	Group1	Group2	OK	20.7643	94.8838	2.19205	8.74284	5e-05	0.000525737	yes
Gbp6	Gbp6	chr5:105270701-105293699	Group1	Group2	OK	0.993203	4.50761	2.1822	5.62175	5e-05	0.000525737	yes
Rarres2	Rarres2	chr6:48554798-48572670	Group1	Group2	OK	49.4087	222.686	2.17218	6.37037	5e-05	0.000525737	yes
Crabp1	Crabp1	chr9:54764747-54773110	Group1	Group2	OK	110.665	497.85	2.16952	8.7225	5e-05	0.000525737	yes
Cxcl10	Cxcl10	chr5:92331826-92414627	Group1	Group2	OK	47.5695	210.194	2.14362	9.07939	5e-05	0.000525737	yes
H2-K1	H2-K1	chr17:33996011-34000333	Group1	Group2	OK	148.41	652.985	2.13746	7.52519	5e-05	0.000525737	yes
Slc22a23	Slc22a23	chr13:34179157-34345182	Group1	Group2	OK	2.07943	9.0439	2.12076	7.39468	5e-05	0.000525737	yes
Steap4	Steap4	chr5:7960471-7982213	Group1	Group2	OK	14.5529	62.4892	2.1023	8.48856	5e-05	0.000525737	yes
Gdnf	Gdnf	chr15:7810047-7837580	Group1	Group2	OK	1.56826	6.68882	2.09259	5.85756	5e-05	0.000525737	yes
Oasl1	Oasl1	chr5:114923239-114937911	Group1	Group2	OK	5.06922	21.6073	2.09168	6.89232	5e-05	0.000525737	yes
Zbp1	Zbp1	chr2:173206611-173218922	Group1	Group2	OK	42.8407	181.23	2.08077	6.80374	5e-05	0.000525737	yes
Apol9a	Apol9a	chr15:77403788-77411080	Group1	Group2	OK	14.5969	61.7015	2.07965	8.06677	5e-05	0.000525737	yes
Gpr35	Gpr35	chr1:92973118-92986391	Group1	Group2	OK	0.638177	2.66098	2.05993	4.59643	5e-05	0.000525737	yes
Tnfrsf9	Tnfrsf9	chr4:150920154-150946102	Group1	Group2	OK	5.57171	23.0945	2.05136	6.77575	5e-05	0.000525737	yes
Oasl2	Oasl2	chr5:114896933-114912245	Group1	Group2	OK	22.06	90.0866	2.02988	8.20163	5e-05	0.000525737	yes
Serpina3f	Serpina3f	chr12:104214543-104241934	Group1	Group2	OK	8.34521	34.0248	2.02757	1.76999	0.0042	0.0251543	yes
Prr16	Prr16	chr18:51117897-51304641	Group1	Group2	OK	1.54996	6.30904	2.02519	4.80257	5e-05	0.000525737	yes
Mx2	Mx2	chr16:97536080-97560901	Group1	Group2	OK	3.72361	15.1	2.01978	6.30103	5e-05	0.000525737	yes
Ifi27l2a	Ifi27l2a	chr12:103433872-103443680	Group1	Group2	OK	193.533	780.39	2.01161	2.38529	5e-05	0.000525737	yes
Phf11d	Phf11d	chr14:59347406-59365490	Group1	Group2	OK	8.04803	32.4296	2.01061	7.8239	5e-05	0.000525737	yes
Il11	Il11	chr7:4772377-4782857	Group1	Group2	OK	0.881836	3.53439	2.00288	3.74555	5e-05	0.000525737	yes
Milr1	Milr1	chr11:106751225-106779537	Group1	Group2	OK	0.718931	2.87781	2.00105	1.66594	0.00815	0.0432984	yes
Ifit1	Ifit1	chr19:34640888-34650009	Group1	Group2	OK	16.517	65.9825	1.99813	8.25759	5e-05	0.000525737	yes
Nos2	Nos2	chr11:78920786-78960226	Group1	Group2	OK	2.9961	11.9003	1.98985	6.58769	5e-05	0.000525737	yes
Rac3	Rac3	chr11:120721467-120723969	Group1	Group2	OK	2.11166	8.33636	1.98104	4.00096	5e-05	0.000525737	yes
Dcn	Dcn	chr10:97479499-97518163	Group1	Group2	OK	494.461	1936.75	1.96971	3.71813	5e-05	0.000525737	yes
Tnn	Tnn	chr1:160085031-160153575	Group1	Group2	OK	1.80341	6.93319	1.94279	6.43775	5e-05	0.000525737	yes
F830016B08Rik	F830016B08Rik	chr18:60293379-60303016	Group1	Group2	OK	1.72372	6.61177	1.93951	5.20405	5e-05	0.000525737	yes
Trim14	Trim14	chr4:46505071-46536141	Group1	Group2	OK	0.760665	2.89861	1.93003	4.07628	5e-05	0.000525737	yes
Ddx60	Ddx60	chr8:61928086-62037701	Group1	Group2	OK	2.6693	9.87388	1.88716	6.82483	5e-05	0.000525737	yes
Hp	Hp	chr8:109575127-109579172	Group1	Group2	OK	163.387	602.152	1.88183	6.3357	5e-05	0.000525737	yes
Ccl7	Ccl7	chr11:82045711-82047523	Group1	Group2	OK	170.016	626.558	1.88177	8.024	5e-05	0.000525737	yes
Rab32	Rab32	chr10:10545038-10558207	Group1	Group2	OK	6.29808	23.0742	1.87329	6.56125	5e-05	0.000525737	yes
Areg	Areg	chr5:91139598-91148432	Group1	Group2	OK	2.83008	10.3434	1.86979	4.23702	5e-05	0.000525737	yes
Nrp2	Nrp2	chr1:62703316-62818692	Group1	Group2	OK	14.3443	52.074	1.86009	8.08646	5e-05	0.000525737	yes
Xaf1	Xaf1	chr11:72301628-72313733	Group1	Group2	OK	10.3356	37.3606	1.8539	7.40483	5e-05	0.000525737	yes
Bst2	Bst2	chr8:71534261-71537437	Group1	Group2	OK	332.663	1194.71	1.84452	6.90542	5e-05	0.000525737	yes
Rtp4	Rtp4	chr16:23609918-23614222	Group1	Group2	OK	20.2476	72.3156	1.83655	7.42031	5e-05	0.000525737	yes
Angpt1	Angpt1	chr15:42424666-42676977	Group1	Group2	OK	2.81257	9.98918	1.82848	6.30241	5e-05	0.000525737	yes
H2-D1	H2-D1	chr17:35263093-35267497	Group1	Group2	OK	188.675	669.378	1.82692	6.16742	5e-05	0.000525737	yes
Il18rap	Il18rap	chr1:40515361-40551705	Group1	Group2	OK	2.7656	9.79975	1.82515	6.50622	5e-05	0.000525737	yes
Phf11b	Phf11b	chr14:59320963-59341330	Group1	Group2	OK	0.90011	3.18918	1.82501	2.7426	5e-05	0.000525737	yes
Lvrn	Lvrn	chr18:46850038-46905446	Group1	Group2	OK	2.13437	7.5513	1.82292	5.30467	5e-05	0.000525737	yes
Nlrc5	Nlrc5	chr8:94472762-94527272	Group1	Group2	OK	2.25116	7.95587	1.82135	6.72405	5e-05	0.000525737	yes
H2-Q7	H2-Q7	chr17:35439154-35443773	Group1	Group2	OK	14.6589	51.5286	1.81359	6.44685	5e-05	0.000525737	yes
Dhx58	Dhx58	chr11:100694883-100704271	Group1	Group2	OK	12.8512	45.1258	1.81204	7.49062	5e-05	0.000525737	yes
Usp18	Usp18	chr6:121245905-121270917	Group1	Group2	OK	26.8525	92.5004	1.7844	7.51238	5e-05	0.000525737	yes
Nr4a1	Nr4a1	chr15:101266845-101274794	Group1	Group2	OK	7.27601	24.81	1.7697	6.59148	5e-05	0.000525737	yes
Pla2g2e	Pla2g2e	chr4:138877941-138882814	Group1	Group2	OK	0.994095	3.38731	1.76868	2.53798	0.0001	0.000990466	yes
Cp	Cp	chr3:19957053-20035310	Group1	Group2	OK	54.1133	184.317	1.76814	6.45539	5e-05	0.000525737	yes
Isg15	Isg15	chr4:156199423-156200818	Group1	Group2	OK	219.594	743.502	1.7595	6.92289	5e-05	0.000525737	yes
Rnf144a	Rnf144a	chr12:26306793-26415262	Group1	Group2	OK	2.93851	9.5544	1.70108	6.24909	5e-05	0.000525737	yes
Psmb9	Psmb9	chr17:34182098-34187330	Group1	Group2	OK	8.63076	27.6986	1.68225	4.51394	5e-05	0.000525737	yes
Gm4951	Gm4951	chr18:60212076-60247820	Group1	Group2	OK	2.67768	8.58615	1.68103	4.77762	5e-05	0.000525737	yes
C2	C2	chr17:34862601-34882100	Group1	Group2	OK	0.684222	2.17842	1.67074	3.14848	5e-05	0.000525737	yes
Fam46c	Fam46c	chr3:100471535-100489192	Group1	Group2	OK	1.03536	3.28919	1.6676	3.30043	5e-05	0.000525737	yes
Parp14	Parp14	chr16:35832877-35871382	Group1	Group2	OK	5.78343	18.3024	1.66204	7.149	5e-05	0.000525737	yes
Mt3	Mt3	chr8:94152606-94154148	Group1	Group2	OK	1.44284	4.56592	1.66199	2.14143	0.0002	0.00184055	yes
Slfn2	Slfn2	chr11:83065111-83070678	Group1	Group2	OK	4.57859	14.4161	1.65471	4.83573	5e-05	0.000525737	yes
Il13ra2	Il13ra2	chrX:147383477-147429192	Group1	Group2	OK	7.03979	22.112	1.65123	5.54361	5e-05	0.000525737	yes
Neurl3	Neurl3	chr1:36264601-36273425	Group1	Group2	OK	0.73764	2.29501	1.63751	3.1396	5e-05	0.000525737	yes
Ttc39c	Ttc39c	chr18:12643532-12737052	Group1	Group2	OK	27.2693	84.0791	1.62447	7.20804	5e-05	0.000525737	yes
Ass1	Ass1	chr2:31470269-31520670	Group1	Group2	OK	2.60483	7.9431	1.60851	3.90808	5e-05	0.000525737	yes
Il16	Il16	chr7:83643062-83735490	Group1	Group2	OK	2.6327	7.99603	1.60274	5.65705	5e-05	0.000525737	yes
Nkd2	Nkd2	chr13:73819327-73847631	Group1	Group2	OK	2.8202	8.53249	1.59717	4.92807	5e-05	0.000525737	yes
Lgals3	Lgals3	chr14:47373859-47386167	Group1	Group2	OK	38.3056	115.885	1.59706	7.14182	5e-05	0.000525737	yes
H2-T22	H2-T22	chr17:36038408-36042702	Group1	Group2	OK	9.95259	30.1076	1.59698	3.52092	5e-05	0.000525737	yes
Tspan11	Tspan11	chr6:127887621-127953031	Group1	Group2	OK	2.83306	8.53257	1.59062	5.4798	5e-05	0.000525737	yes
Trim30a	Trim30a	chr7:104409025-104465193	Group1	Group2	OK	9.7966	29.4925	1.59	6.6383	5e-05	0.000525737	yes
Stc2	Stc2	chr11:31359440-31370061	Group1	Group2	OK	9.82654	29.5149	1.58669	5.76828	5e-05	0.000525737	yes
Ptch1	Ptch1	chr13:63511532-63565520	Group1	Group2	OK	5.82451	17.3278	1.57288	6.33725	5e-05	0.000525737	yes
H2-Q4	H2-Q4	chr17:35379616-35384674	Group1	Group2	OK	67.227	199.689	1.57064	6.63971	5e-05	0.000525737	yes
Htr1b	Htr1b	chr9:81631391-81632552	Group1	Group2	OK	0.954026	2.81818	1.56266	2.50256	0.0001	0.000990466	yes
Sp100	Sp100	chr1:85649987-85709997	Group1	Group2	OK	6.013	17.726	1.55971	5.01164	5e-05	0.000525737	yes
Lgals3bp	Lgals3bp	chr11:118392751-118401931	Group1	Group2	OK	114.835	336.833	1.55247	5.98061	5e-05	0.000525737	yes
Gareml	Gareml	chr5:30103583-30154980	Group1	Group2	OK	2.89583	8.44307	1.54379	2.08675	0.00025	0.00224223	yes
Il33	Il33	chr19:29925113-29960715	Group1	Group2	OK	67.1208	195.242	1.54043	6.22565	5e-05	0.000525737	yes
Gbp5	Gbp5	chr3:142496933-142522344	Group1	Group2	OK	2.84605	8.20673	1.52785	4.6593	5e-05	0.000525737	yes
Mitf	Mitf	chr6:97807057-98021358	Group1	Group2	OK	1.72181	4.9373	1.51979	4.67704	5e-05	0.000525737	yes
Aqp1	Aqp1	chr6:55336298-55348555	Group1	Group2	OK	4.02963	11.5218	1.51564	4.94591	5e-05	0.000525737	yes
C3	C3	chr17:57203966-57228136	Group1	Group2	OK	111.928	318.963	1.51082	4.16274	5e-05	0.000525737	yes
Slfn8	Slfn8	chr11:83002157-83020810	Group1	Group2	OK	4.57186	13.0161	1.50944	5.5397	5e-05	0.000525737	yes
Zc3h12a	Zc3h12a	chr4:125118413-125127881	Group1	Group2	OK	8.72653	24.7511	1.50401	5.93836	5e-05	0.000525737	yes
Gpnmb	Gpnmb	chr6:49036517-49058182	Group1	Group2	OK	70.7438	199.329	1.49447	4.70382	5e-05	0.000525737	yes
Psmb8	Psmb8	chr17:34198194-34201454	Group1	Group2	OK	29.8008	83.8401	1.49229	6.26592	5e-05	0.000525737	yes
Ptprn	Ptprn	chr1:75247040-75264208	Group1	Group2	OK	12.4142	34.8416	1.48882	6.33054	5e-05	0.000525737	yes
Pde6h	Pde6h	chr6:136954522-136963483	Group1	Group2	OK	1.54946	4.33422	1.484	2.03606	0.00045	0.00373562	yes
Gbp7	Gbp7	chr3:142530335-142550151	Group1	Group2	OK	5.48845	15.3447	1.48327	6.09575	5e-05	0.000525737	yes
B2m	B2m	chr2:122120107-122186189	Group1	Group2	OK	975.862	2724.81	1.48141	4.13447	5e-05	0.000525737	yes
Sfrp2	Sfrp2	chr3:83766320-83774314	Group1	Group2	OK	11.3724	31.6835	1.4782	5.52991	5e-05	0.000525737	yes
Ptges	Ptges	chr2:30889470-30903297	Group1	Group2	OK	7.92536	21.9345	1.46865	5.8528	5e-05	0.000525737	yes
Slco4a1	Slco4a1	chr2:180460977-180474853	Group1	Group2	OK	2.36377	6.47821	1.4545	4.19587	5e-05	0.000525737	yes
C1qtnf7	C1qtnf7	chr5:43515568-43616586	Group1	Group2	OK	9.01886	24.6775	1.45218	4.78038	5e-05	0.000525737	yes
Tap1	Tap1	chr17:34187555-34197225	Group1	Group2	OK	13.0559	35.6187	1.44793	6.12426	5e-05	0.000525737	yes
Trim34a	Trim34a	chr7:104244456-104262236	Group1	Group2	OK	1.30322	3.54861	1.44518	3.23802	5e-05	0.000525737	yes
Stat1	Stat1	chr1:52119437-52161865	Group1	Group2	OK	14.7101	39.656	1.43074	6.21114	5e-05	0.000525737	yes
Tor3a	Tor3a	chr1:156653616-156674339	Group1	Group2	OK	15.6215	42.0424	1.42832	6.25738	5e-05	0.000525737	yes
Slc24a3	Slc24a3	chr2:145242610-145641939	Group1	Group2	OK	4.25546	11.4435	1.42714	5.13433	5e-05	0.000525737	yes
Tlr2	Tlr2	chr3:83836271-83841608	Group1	Group2	OK	6.45562	17.3358	1.42513	5.38351	5e-05	0.000525737	yes
Adamts7	Adamts7	chr9:90162977-90200102	Group1	Group2	OK	17.0981	45.8356	1.42263	6.3933	5e-05	0.000525737	yes
Nmi	Nmi	chr2:51948498-51973208	Group1	Group2	OK	7.1633	19.1918	1.42179	4.27549	5e-05	0.000525737	yes
Ramp3	Ramp3	chr11:6658532-6677475	Group1	Group2	OK	3.05345	8.17594	1.42095	3.18451	5e-05	0.000525737	yes
Cpeb2	Cpeb2	chr5:43233462-43289724	Group1	Group2	OK	1.95753	5.21831	1.41455	4.99899	5e-05	0.000525737	yes
Gbp2	Gbp2	chr3:142620662-142638008	Group1	Group2	OK	18.1429	48.2792	1.412	6.15909	5e-05	0.000525737	yes
Ifih1	Ifih1	chr2:62595792-62646255	Group1	Group2	OK	6.44372	17.1433	1.41168	5.99462	5e-05	0.000525737	yes
Sod3	Sod3	chr5:52363803-52369738	Group1	Group2	OK	27.3348	72.3669	1.40459	6.04418	5e-05	0.000525737	yes
Mmp2	Mmp2	chr8:92827327-92853420	Group1	Group2	OK	8.47598	22.3507	1.39887	5.79733	5e-05	0.000525737	yes
Slc7a2	Slc7a2	chr8:40862366-40922070	Group1	Group2	OK	10.1231	26.6827	1.39825	6.08983	5e-05	0.000525737	yes
Cd74	Cd74	chr18:60803848-60812652	Group1	Group2	OK	18.6423	48.8236	1.389	5.11785	5e-05	0.000525737	yes
En1	En1	chr1:120602486-120607991	Group1	Group2	OK	2.59828	6.7871	1.38524	3.85435	5e-05	0.000525737	yes
Igtp	Igtp	chr11:58199555-58207592	Group1	Group2	OK	18.3204	47.7545	1.38219	5.83447	5e-05	0.000525737	yes
Samd9l	Samd9l	chr6:3372257-3399571	Group1	Group2	OK	5.80811	15.0553	1.37413	5.73597	5e-05	0.000525737	yes
Ifi203	Ifi203	chr1:173920400-173942672	Group1	Group2	OK	7.97044	20.5272	1.36481	5.59429	5e-05	0.000525737	yes
1700112E06Rik	1700112E06Rik	chr14:22019711-23056088	Group1	Group2	OK	1.68289	4.32593	1.36207	2.32176	5e-05	0.000525737	yes
Oas1b	Oas1b	chr5:120812634-120824160	Group1	Group2	OK	9.03095	23.0928	1.35449	4.92781	5e-05	0.000525737	yes
Msx2	Msx2	chr13:53466880-53472780	Group1	Group2	OK	0.98071	2.50225	1.35132	2.63176	5e-05	0.000525737	yes
Parp9	Parp9	chr16:35926514-35972621	Group1	Group2	OK	11.9778	30.455	1.34632	4.74576	5e-05	0.000525737	yes
Prrx1	Prrx1	chr1:163245118-163313650	Group1	Group2	OK	42.8797	108.925	1.34497	5.40013	5e-05	0.000525737	yes
Ch25h	Ch25h	chr19:34473783-34475135	Group1	Group2	OK	20.1698	51.0873	1.34077	5.35896	5e-05	0.000525737	yes
P2ry2	P2ry2	chr7:100996567-101012053	Group1	Group2	OK	1.35778	3.43504	1.33907	3.1871	5e-05	0.000525737	yes
Wnt10a	Wnt10a	chr1:74792018-74804175	Group1	Group2	OK	5.15615	13.0004	1.33419	4.24251	5e-05	0.000525737	yes
Ddx4	Ddx4	chr13:112598332-112652310	Group1	Group2	OK	2.45599	6.14361	1.32278	3.67109	5e-05	0.000525737	yes
Hap1	Hap1	chr11:100347326-100356141	Group1	Group2	OK	11.3134	28.2113	1.31824	5.61061	5e-05	0.000525737	yes
Slit3	Slit3	chr11:35121455-35708507	Group1	Group2	OK	22.603	56.2709	1.31588	5.79751	5e-05	0.000525737	yes
AI607873	AI607873	chr1:173723427-173741809	Group1	Group2	OK	9.94266	24.7072	1.31323	5.49812	5e-05	0.000525737	yes
Lrig1	Lrig1	chr6:94500313-94700145	Group1	Group2	OK	35.8447	88.8958	1.31036	5.45645	5e-05	0.000525737	yes
Parm1	Parm1	chr5:91517699-91623996	Group1	Group2	OK	0.836574	2.06714	1.30507	2.19659	5e-05	0.000525737	yes
Arhgdib	Arhgdib	chr6:136923660-136941899	Group1	Group2	OK	42.9077	105.683	1.30044	5.66693	5e-05	0.000525737	yes
Rgs2	Rgs2	chr1:143999337-144004149	Group1	Group2	OK	1.80179	4.43721	1.30022	3.35685	5e-05	0.000525737	yes
Cd14	Cd14	chr18:36725063-36726815	Group1	Group2	OK	16.6179	40.8589	1.29791	5.1626	5e-05	0.000525737	yes
Ddx58	Ddx58	chr4:40203776-40239825	Group1	Group2	OK	21.1707	52.0438	1.29766	5.71333	5e-05	0.000525737	yes
Il34	Il34	chr8:110741828-110805924	Group1	Group2	OK	0.91414	2.24717	1.29762	2.32084	5e-05	0.000525737	yes
Tapbp	Tapbp	chr17:33919477-33929290	Group1	Group2	OK	48.57	119.333	1.29685	5.63813	5e-05	0.000525737	yes
Mmp10	Mmp10	chr9:7502341-7510242	Group1	Group2	OK	1.05371	2.5828	1.29346	2.37592	5e-05	0.000525737	yes
Fam46a	Fam46a	chr9:85320438-85327150	Group1	Group2	OK	4.83283	11.7888	1.28647	5.20528	5e-05	0.000525737	yes
Fst	Fst	chr13:114452261-114458951	Group1	Group2	OK	2.10145	5.11214	1.28254	3.31455	5e-05	0.000525737	yes
H2-T9	H2-T9	chr17:36038408-36042702	Group1	Group2	OK	23.2718	56.586	1.28186	4.30529	5e-05	0.000525737	yes
Twist2	Twist2	chr1:91801460-91848034	Group1	Group2	OK	43.3288	104.998	1.27696	5.64646	5e-05	0.000525737	yes
Ereg	Ereg	chr5:91074616-91093649	Group1	Group2	OK	11.7698	28.4601	1.27385	5.43408	5e-05	0.000525737	yes
Ube2l6	Ube2l6	chr2:84798827-84810003	Group1	Group2	OK	18.5354	44.447	1.2618	5.0406	5e-05	0.000525737	yes
Trim30d	Trim30d	chr7:104470013-104507849	Group1	Group2	OK	3.91382	9.36369	1.2585	4.36686	5e-05	0.000525737	yes
Stat2	Stat2	chr10:128270575-128292849	Group1	Group2	OK	30.0539	71.8394	1.25722	5.39896	5e-05	0.000525737	yes
Hopx	Hopx	chr5:77086985-77115123	Group1	Group2	OK	1.75659	4.19505	1.25591	2.30959	5e-05	0.000525737	yes
Ly6e	Ly6e	chr15:74955050-74959905	Group1	Group2	OK	146.005	347.953	1.25288	4.91606	5e-05	0.000525737	yes
Fam20c	Fam20c	chr5:138755080-138810063	Group1	Group2	OK	9.38917	22.3575	1.25169	5.24829	5e-05	0.000525737	yes
Dgat2	Dgat2	chr7:99153662-99182713	Group1	Group2	OK	14.9451	35.5749	1.25119	5.21448	5e-05	0.000525737	yes
Pcsk9	Pcsk9	chr4:106442333-106464325	Group1	Group2	OK	1.20556	2.85661	1.2446	3.00909	5e-05	0.000525737	yes
Serpinb2	Serpinb2	chr1:107511422-107525600	Group1	Group2	OK	1.57775	3.72282	1.23853	2.55783	5e-05	0.000525737	yes
Gch1	Gch1	chr14:47153894-47189402	Group1	Group2	OK	5.77528	13.5884	1.23441	4.50847	5e-05	0.000525737	yes
Erap1	Erap1	chr13:74639871-74691875	Group1	Group2	OK	5.55613	13.0536	1.23229	4.88357	5e-05	0.000525737	yes
Epas1	Epas1	chr17:86753863-86833410	Group1	Group2	OK	6.78011	15.9236	1.23179	5.11769	5e-05	0.000525737	yes
Parp12	Parp12	chr6:39086411-39118349	Group1	Group2	OK	23.0689	53.4349	1.21183	5.41153	5e-05	0.000525737	yes
Slc16a1	Slc16a1	chr3:104638663-104658462	Group1	Group2	OK	59.6689	138.056	1.2102	4.8918	5e-05	0.000525737	yes
Wnt6	Wnt6	chr1:74771891-74785319	Group1	Group2	OK	2.27175	5.23655	1.20481	2.96191	5e-05	0.000525737	yes
Trim12c	Trim12c	chr7:104338753-104353358	Group1	Group2	OK	4.64161	10.6076	1.1924	4.40919	5e-05	0.000525737	yes
Cd53	Cd53	chr3:106758860-106790149	Group1	Group2	OK	0.990775	2.26049	1.19001	2.47324	5e-05	0.000525737	yes
Retn	Retn	chr8:3655769-3659818	Group1	Group2	OK	5.51608	12.5775	1.18913	2.30985	5e-05	0.000525737	yes
Zmynd15	Zmynd15	chr11:70454233-70466199	Group1	Group2	OK	1.51445	3.4506	1.18805	1.67509	0.00165	0.011458	yes
Ccl8	Ccl8	chr11:82115184-82116799	Group1	Group2	OK	2.6893	6.10579	1.18295	1.75109	0.0012	0.00875266	yes
Has1	Has1	chr17:17843325-17855188	Group1	Group2	OK	3.10627	7.04287	1.18098	3.20689	5e-05	0.000525737	yes
Irgm2	Irgm2	chr11:58214976-58222783	Group1	Group2	OK	13.9964	31.534	1.17185	5.05489	5e-05	0.000525737	yes
Egln3	Egln3	chr12:54178980-54203874	Group1	Group2	OK	2.60795	5.85862	1.16764	3.24231	5e-05	0.000525737	yes
Iigp1	Iigp1	chr18:60376028-60392629	Group1	Group2	OK	24.8488	55.5926	1.16172	5.02976	5e-05	0.000525737	yes
H2-T10	H2-T10	chr17:36115870-36121444	Group1	Group2	OK	2.55667	5.69793	1.15617	3.30991	5e-05	0.000525737	yes
Glrx	Glrx	chr13:75839885-75850151	Group1	Group2	OK	17.9322	39.5679	1.14178	4.46218	5e-05	0.000525737	yes
Stac2	Stac2	chr11:98036623-98053462	Group1	Group2	OK	6.23961	13.7565	1.14059	4.21974	5e-05	0.000525737	yes
Pla1a	Pla1a	chr16:38396116-38433145	Group1	Group2	OK	2.33312	5.13303	1.13755	2.7406	5e-05	0.000525737	yes
Fgf10	Fgf10	chr13:118714698-118792573	Group1	Group2	OK	4.7077	10.352	1.13681	4.42703	5e-05	0.000525737	yes
Adar	Adar	chr3:89715021-89764632	Group1	Group2	OK	17.8967	39.2372	1.13253	5.09618	5e-05	0.000525737	yes
Gfra2	Gfra2	chr14:70890106-70979840	Group1	Group2	OK	1.05914	2.31481	1.128	2.56	5e-05	0.000525737	yes
Irgm1	Irgm1	chr11:48865248-48871346	Group1	Group2	OK	39.9322	87.202	1.12681	4.89942	5e-05	0.000525737	yes
Ifi205	Ifi205	chr1:174011997-174031755	Group1	Group2	OK	5.53345	12.0736	1.1256	3.30237	5e-05	0.000525737	yes
Rerg	Rerg	chr6:137054824-137170496	Group1	Group2	OK	1.16766	2.54586	1.12453	2.24765	5e-05	0.000525737	yes
Dtx3l	Dtx3l	chr16:35926514-35972621	Group1	Group2	OK	4.50662	9.77375	1.11687	2.74946	5e-05	0.000525737	yes
Lrrc8d	Lrrc8d	chr5:105699968-105815215	Group1	Group2	OK	3.64711	7.90124	1.11533	3.94511	5e-05	0.000525737	yes
Uba7	Uba7	chr9:107975566-107984056	Group1	Group2	OK	10.4553	22.6225	1.11353	4.59448	5e-05	0.000525737	yes
Lama4	Lama4	chr10:38965514-39110188	Group1	Group2	OK	13.1985	28.5484	1.11304	5.09727	5e-05	0.000525737	yes
Adamts9	Adamts9	chr6:92772698-92901441	Group1	Group2	OK	3.92797	8.44702	1.10466	4.31911	5e-05	0.000525737	yes
Sgcd	Sgcd	chr11:46978782-47379302	Group1	Group2	OK	1.2401	2.64389	1.09221	1.93607	0.00025	0.00224223	yes
St6galnac5	St6galnac5	chr3:152820709-152982207	Group1	Group2	OK	2.44834	5.21281	1.09026	2.68508	5e-05	0.000525737	yes
Helz2	Helz2	chr2:181227614-181242027	Group1	Group2	OK	15.593	33.1783	1.08934	4.76692	5e-05	0.000525737	yes
Mndal	Mndal	chr1:173857219-173880187	Group1	Group2	OK	11.0002	23.3777	1.0876	4.14216	5e-05	0.000525737	yes
Fam26f	Fam26f	chr10:34126066-34127972	Group1	Group2	OK	0.999202	2.11855	1.08423	1.63596	0.00195	0.0132132	yes
Fam110c	Fam110c	chr12:31073967-31079940	Group1	Group2	OK	7.3222	15.4532	1.07756	3.98714	5e-05	0.000525737	yes
Ctsk	Ctsk	chr3:95499209-95509387	Group1	Group2	OK	4.67999	9.80357	1.0668	2.94205	5e-05	0.000525737	yes
Gxylt2	Gxylt2	chr6:100704733-100805081	Group1	Group2	OK	8.77976	18.3817	1.06601	3.77678	5e-05	0.000525737	yes
Bdkrb2	Bdkrb2	chr12:105563171-105593071	Group1	Group2	OK	6.79304	14.21	1.06478	3.33175	5e-05	0.000525737	yes
Mfap3l	Mfap3l	chr8:60632824-60676731	Group1	Group2	OK	1.80354	3.76981	1.06366	3.46651	5e-05	0.000525737	yes
Capn6	Capn6	chrX:143802236-143827412	Group1	Group2	OK	15.9838	33.3439	1.06081	4.78423	5e-05	0.000525737	yes
Spink2	Spink2	chr5:77205105-77211471	Group1	Group2	OK	1.28234	2.67471	1.06061	1.31002	0.0057	0.0322621	yes
Sema7a	Sema7a	chr9:57940134-57962865	Group1	Group2	OK	3.63188	7.57191	1.05994	3.48029	5e-05	0.000525737	yes
Gsto1	Gsto1	chr19:47854972-47864788	Group1	Group2	OK	92.1904	191.741	1.05647	4.80869	5e-05	0.000525737	yes
Pi15	Pi15	chr1:17601900-17630939	Group1	Group2	OK	5.36053	11.1027	1.05046	4.43973	5e-05	0.000525737	yes
Nr4a2	Nr4a2	chr2:57107225-57124003	Group1	Group2	OK	3.85331	7.97379	1.04917	3.42487	5e-05	0.000525737	yes
Rgcc	Rgcc	chr14:79288749-79301635	Group1	Group2	OK	3.77364	7.8061	1.04864	2.20697	5e-05	0.000525737	yes
Ifitm3	Ifitm3	chr7:141009589-141010744	Group1	Group2	OK	1267.14	2618.5	1.04717	3.59235	5e-05	0.000525737	yes
Slc16a2	Slc16a2	chrX:103697413-103821988	Group1	Group2	OK	12.8768	26.5298	1.04284	4.748	5e-05	0.000525737	yes
Trim12a	Trim12a	chr7:104299896-104315495	Group1	Group2	OK	6.59651	13.5813	1.04185	3.16369	5e-05	0.000525737	yes
a	a	chr2:155013569-155051012	Group1	Group2	OK	7.31754	15.0105	1.03654	2.35634	5e-05	0.000525737	yes
Tlr3	Tlr3	chr8:45395664-45410539	Group1	Group2	OK	3.96512	8.12094	1.03428	3.80367	5e-05	0.000525737	yes
Herc6	Herc6	chr6:57580991-57665136	Group1	Group2	OK	7.36939	15.0367	1.02887	4.44574	5e-05	0.000525737	yes
Fgf1	Fgf1	chr18:38838672-38971274	Group1	Group2	OK	1.25363	2.55692	1.0283	2.52966	5e-05	0.000525737	yes
Ptpn5	Ptpn5	chr7:47077799-47133684	Group1	Group2	OK	4.07545	8.27593	1.02196	3.3399	5e-05	0.000525737	yes
Calcrl	Calcrl	chr2:84330626-84425266	Group1	Group2	OK	4.07852	8.27912	1.02143	3.93296	5e-05	0.000525737	yes
Trps1	Trps1	chr15:50654758-50890041	Group1	Group2	OK	5.76426	11.6456	1.01458	4.65461	5e-05	0.000525737	yes
Fgf7	Fgf7	chr2:125859108-126152004	Group1	Group2	OK	71.4813	144.165	1.01208	3.66595	5e-05	0.000525737	yes
Nmnat3	Nmnat3	chr9:98296582-98411428	Group1	Group2	OK	5.23173	10.5263	1.00864	3.25148	5e-05	0.000525737	yes
Cdo1	Cdo1	chr18:46713204-46728342	Group1	Group2	OK	11.4203	22.8825	1.00265	3.62808	5e-05	0.000525737	yes

## Sheet: ranked Group 2 vs Group 1
gene_id	log2(fold_change)
Ces1a	5.00277
Il6	4.10817
Slpi	4.04738
Oas3	4.04203
Csf2	3.93443
Cbr2	3.89481
Csf3	3.56327
Cxcl1	3.49573
Lif	3.49208
Saa2	3.47992
Penk	3.47019
Ism1	3.45121
Cxcl2	3.3876
Mx1	3.35163
Il1rl1	3.29854
Ifi44	3.22367
Lcn2	3.12287
Oas2	3.08213
Cxcl3	3.04045
Cmpk2	2.97725
Ifit3	2.96069
Sprr2h	2.95128
Ifit3b	2.90418
Saa3	2.81888
Gm12250	2.76249
Rsad2	2.76163
Slc39a4	2.73726
Batf	2.7139
Lum	2.67327
S100a8	2.65921
Apod	2.63977
Slc15a3	2.61304
Syt7	2.56891
Atp8b4	2.56453
Camp	2.55411
Irf7	2.55213
Cck	2.54973
Cfb	2.54653
Saa1	2.53828
Ptgs2	2.47439
Oas1a	2.47168
Ccl2	2.46646
Oas1g	2.46289
Upp1	2.40554
Stc1	2.39959
Ccl5	2.39604
H2-Q8	2.36759
Apol9b	2.35355
Igfbp2	2.27983
Mmp9	2.24141
H2-T23	2.22999
Cxcl5	2.21732
Gbp3	2.19205
Gbp6	2.1822
Rarres2	2.17218
Crabp1	2.16952
Cxcl10	2.14362
H2-K1	2.13746
Slc22a23	2.12076
H2-L	2.11894
Steap4	2.1023
Gdnf	2.09259
Oasl1	2.09168
Zbp1	2.08077
Apol9a	2.07965
Gpr35	2.05993
Tnfrsf9	2.05136
Oasl2	2.02988
Serpina3f	2.02757
Prr16	2.02519
Mx2	2.01978
Ifi27l2a	2.01161
Phf11d	2.01061
Il11	2.00288
Milr1	2.00105
Ifit1	1.99813
Nos2	1.98985
Rac3	1.98104
Dcn	1.96971
Tnn	1.94279
F830016B08Rik	1.93951
Trim14	1.93003
Ddx60	1.88716
Hp	1.88183
Ccl7	1.88177
Rab32	1.87329
Areg	1.86979
Nrp2	1.86009
Xaf1	1.8539
Bst2	1.84452
Rtp4	1.83655
Angpt1	1.82848
H2-D1	1.82692
Il18rap	1.82515
Phf11b	1.82501
Lvrn	1.82292
Nlrc5	1.82135
H2-Q7	1.81359
Dhx58	1.81204
Usp18	1.7844
Nr4a1	1.7697
Pla2g2e	1.76868
Cp	1.76814
Isg15	1.7595
Rnf144a	1.70108
Psmb9	1.68225
Gm4951	1.68103
C2	1.67074
Fam46c	1.6676
Parp14	1.66204
Mt3	1.66199
Slfn2	1.65471
Il13ra2	1.65123
Neurl3	1.63751
Ttc39c	1.62447
Ass1	1.60851
Il16	1.60274
Nkd2	1.59717
Lgals3	1.59706
H2-T22	1.59698
Tspan11	1.59062
Trim30a	1.59
Stc2	1.58669
Ptch1	1.57288
H2-Q4	1.57064
Htr1b	1.56266
Sp100	1.55971
Lgals3bp	1.55247
Gareml	1.54379
Il33	1.54043
Gbp5	1.52785
Mitf	1.51979
Aqp1	1.51564
C3	1.51082
Slfn8	1.50944
Zc3h12a	1.50401
Gpnmb	1.49447
Psmb8	1.49229
Ptprn	1.48882
Pde6h	1.484
Gbp7	1.48327
B2m	1.48141
Sfrp2	1.4782
Ptges	1.46865
Slco4a1	1.4545
C1qtnf7	1.45218
Tap1	1.44793
Trim34a	1.44518
Stat1	1.43074
Tor3a	1.42832
Slc24a3	1.42714
Tlr2	1.42513
Adamts7	1.42263
Nmi	1.42179
Ramp3	1.42095
Cpeb2	1.41455
Gbp2	1.412
Ifih1	1.41168
Sod3	1.40459
Mmp2	1.39887
Slc7a2	1.39825
Cd74	1.389
En1	1.38524
Igtp	1.38219
Samd9l	1.37413
Ifi203	1.36481
1700112E06Rik	1.36207
Oas1b	1.35449
Msx2	1.35132
Parp9	1.34632
Prrx1	1.34497
Ch25h	1.34077
P2ry2	1.33907
Wnt10a	1.33419
Ddx4	1.32278
Hap1	1.31824
Slit3	1.31588
AI607873	1.31323
Lrig1	1.31036
Parm1	1.30507
Arhgdib	1.30044
Rgs2	1.30022
Cd14	1.29791
Ddx58	1.29766
Il34	1.29762
Tapbp	1.29685
Mmp10	1.29346
Fam46a	1.28647
Fst	1.28254
H2-T9	1.28186
Twist2	1.27696
Ereg	1.27385
Ube2l6	1.2618
Trim30d	1.2585
Stat2	1.25722
Hopx	1.25591
Ly6e	1.25288
Fam20c	1.25169
Dgat2	1.25119
Pcsk9	1.2446
Serpinb2	1.23853
Gch1	1.23441
Erap1	1.23229
Epas1	1.23179
Parp12	1.21183
Slc16a1	1.2102
Wnt6	1.20481
Trim12c	1.1924
Cd53	1.19001
Retn	1.18913
Zmynd15	1.18805
Ccl8	1.18295
Has1	1.18098
Irgm2	1.17185
Egln3	1.16764
Ndufa4l2	1.16243
Iigp1	1.16172
H2-T10	1.15617
Glrx	1.14178
Stac2	1.14059
Pla1a	1.13755
Fgf10	1.13681
Adar	1.13253
Gfra2	1.128
Irgm1	1.12681
Ifi205	1.1256
Rerg	1.12453
Dtx3l	1.11687
Lrrc8d	1.11533
Uba7	1.11353
Lama4	1.11304
Adamts9	1.10466
Sgcd	1.09221
St6galnac5	1.09026
Helz2	1.08934
Mndal	1.0876
Fam26f	1.08423
Fam110c	1.07756
Ctsk	1.0668
Gxylt2	1.06601
Bdkrb2	1.06478
Mfap3l	1.06366
Capn6	1.06081
Spink2	1.06061
Sema7a	1.05994
Gsto1	1.05647
Pi15	1.05046
Nr4a2	1.04917
Rgcc	1.04864
Ifitm3	1.04717
Slc16a2	1.04284
Trim12a	1.04185
a	1.03654
Tlr3	1.03428
Herc6	1.02887
Fgf1	1.0283
Ptpn5	1.02196
Calcrl	1.02143
Trps1	1.01458
Fgf7	1.01208
Ugt1a6b	1.01142
Nmnat3	1.00864
Cdo1	1.00265
Thbd	0.996842
Uap1l1	0.996288
Ifitm1	0.993956
Ak4	0.984482
Ifi35	0.983306
Plpp3	0.982578
Trim21	0.981756
Ifi47	0.979784
Soat2	0.977974
Kifc3	0.977559
Angptl4	0.974236
Fosl1	0.969219
Il1rap	0.963534
Thbs2	0.959939
Npc2	0.953959
Vav3	0.952114
Cxcl16	0.948881
Parp10	0.948405
Psmb10	0.94648
Mlkl	0.942351
Pxdc1	0.936983
Slit2	0.936783
Slc4a4	0.931324
Slc2a6	0.928345
Micall2	0.926859
Irf9	0.925165
Pnp2	0.924472
Cabyr	0.923051
Olfm1	0.921605
Shisa5	0.920146
Mmp16	0.914976
Fam83f	0.909386
Eif2ak2	0.907113
Spint1	0.906386
Map2k6	0.902439
Fam162a	0.900325
Dpy19l1	0.89974
Tslp	0.897448
Dact2	0.894058
Samd5	0.892362
Sqrdl	0.88853
Lgi2	0.888141
Fam212a	0.887434
Mitd1	0.886551
Col5a3	0.886297
Murc	0.884756
Pim2	0.882255
Clmp	0.881542
H2-T24	0.88082
Trib2	0.877973
Cacna1c	0.877008
Tmem106a	0.876783
Kcne4	0.875991
Nampt	0.875411
Sprr2e	0.873111
Mmp3	0.868769
Adh7	0.865577
Isg20	0.864667
Tmem140	0.862651
Fetub	0.848383
Ctsh	0.844979
Tnc	0.842944
Slc6a17	0.840954
Slc11a2	0.838492
Trim25	0.837746
Hr	0.831668
Pdk1	0.831185
Ets2	0.830185
Tac1	0.829131
Mfsd7c	0.827658
Peli2	0.826779
Mt2	0.824218
Atp8b1	0.824167
P2rx4	0.820037
Slc16a3	0.817334
Hmga1-rs1	0.811797
Arc	0.808498
Mnda	0.806657
Srgap3	0.805455
Enpp2	0.803194
Nfkb1	0.801811
Raph1	0.801733
Uaca	0.800972
Ndrg1	0.800816
Atp6v0e2	0.800144
Dusp6	0.80013
Oaf	0.797097
Mapkapk2	0.796669
Hpse	0.796319
Gpm6b	0.792348
Repin1	0.791445
Adm2	0.791107
1110008P14Rik	0.787053
Gpr149	0.785632
Rab11fip1	0.785091
Grem1	0.785039
Kcnk2	0.784728
C1s2	0.784539
Oas1c	0.784417
Ccdc149	0.779784
Ptpn6	0.778232
Fnip2	0.777657
Dok5	0.776281
Nadk	0.774178
Ampd3	0.769595
Apobec1	0.765895
Gbe1	0.765482
Gem	0.762833
Zfpm2	0.76031
Cc2d2a	0.759385
Cd300lb	0.757483
Tmem176b	0.753121
Gla	0.752935
Antxr1	0.750566
Zc3hav1	0.750335
Cxadr	0.749526
Rbp4	0.748909
Gnai1	0.748531
Parp11	0.74553
Tm4sf1	0.743348
Ripk2	0.740918
Ptgir	0.740432
Dnmt3l	0.740285
Lgals7	0.739712
Smoc1	0.739665
Lamc2	0.73844
Cyb5a	0.736538
Arntl	0.735809
Prelid2	0.734211
Gja1	0.733235
Agrn	0.728382
Ppm1l	0.727425
Il1rn	0.726642
Lmo4	0.722457
Apol6	0.719894
Stom	0.718379
Gfod1	0.714535
Rasa1	0.713067
Ascc3	0.712857
Dpp7	0.708848
Pla2g4a	0.707193
Mov10	0.706073
Tmco4	0.705827
Hfe	0.70452
Ndst3	0.703275
Nfkbia	0.701791
Smpdl3b	0.701623
S100a4	0.700469
Acot2	0.699072
Ifi204	0.697077
Fndc3a	0.696274
Slc31a2	0.695145
Tdrd7	0.694649
Tor1aip1	0.694214
Rnf149	0.693648
Stk10	0.690593
Macrod1	0.690309
Comtd1	0.68794
Eva1b	0.6852
Mrgprf	0.682395
Nfkbiz	0.681193
Ogfr	0.676306
Trex1	0.674226
Birc3	0.670761
Bid	0.667333
Sat1	0.66512
Rhbdf2	0.664582
Plk2	0.663348
Tbc1d2b	0.660676
Krt80	0.660554
Lgals9	0.658803
Tmem176a	0.658641
Slc5a6	0.657071
Aldoc	0.65705
Znfx1	0.656856
Tnfrsf23	0.656156
Renbp	0.651252
Ezr	0.650626
Plscr1	0.650614
Gas7	0.649721
A4galt	0.646013
Anxa9	0.644018
Psmd10	0.643816
Sod2	0.643531
Mt1	0.643217
Il18bp	0.643132
Myc	0.640326
Gpc1	0.63767
Aig1	0.636909
Ier3	0.636633
Relb	0.635372
Fth1	0.631465
Zfp467	0.630489
Hmga1	0.63038
Ciart	0.630182
Shc2	0.624472
Tap2	0.624054
Slc25a37	0.623828
Slc2a1	0.623804
Bnip3	0.621279
Fbln1	0.62033
P4ha2	0.620078
Pfkp	0.619805
Zc3h12c	0.615691
AA467197	0.612032
Errfi1	0.610724
Susd6	0.610084
S100a3	0.609309
Acsl6	0.608456
Emp2	0.605155
Ptchd4	0.602724
A230050P20Rik	0.602519
Itprip	0.599448
Gnrh1	0.599371
Plin2	0.596295
Net1	0.59508
Atf3	0.593179
Tyms	0.593141
Ifitm2	0.592935
Rgs3	0.592184
Otud1	0.591584
Bdkrb1	0.591536
Nbea	0.590543
Lrp1	0.589392
Scamp1	0.588252
Itga6	0.588167
Mthfd1l	0.587934
Jam2	0.585404
Erdr1	0.58503
Rin1	0.583964
Egr2	0.583731
Irak3	0.581328
Rbm43	0.579239
Serpina3g	0.578382
Fabp3	0.577042
Arsj	0.575853
Tnfaip8	0.57554
Ldha	0.574632
Aftph	0.573576
Cystm1	0.571299
Rasl12	0.571016
Ptgfr	0.570407
Tfrc	0.569833
Rsbn1	0.568855
Nbl1	0.56598
Pgf	0.565528
Stxbp3	0.565188
Serping1	0.565134
Gdpd1	0.564619
Mif	0.562673
Prune2	0.562592
Abcc4	0.561298
Vcpkmt	0.558935
Gnb4	0.55678
Arhgap39	0.554859
Ptrh1	0.554815
Mapkapk3	0.554082
Mapk12	0.550775
Hexa	0.550258
Sp140	0.549634
Stard5	0.548586
Cebpb	0.547497
Cln3	0.547289
Ehd4	0.546742
Pcdh1	0.545872
Tnfaip6	0.545446
Grn	0.540746
Timp1	0.538029
Aldoart1	0.537865
Insig1	0.537521
Il1rl2	0.537409
Slc38a7	0.5372
Slc7a11	0.536671
Exoc6	0.534207
Cmtr1	0.531333
Ero1l	0.53102
Lss	0.530588
Tspo	0.53048
Ntn1	0.53033
Hspb7	0.526534
Sdk1	0.526188
Serp2	0.524829
Pgk1	0.52299
Htr2a	0.522763
Sco2	0.520202
Dock5	0.517797
Dram1	0.517507
Fmnl2	0.517242
Rin2	0.514819
Sorbs2	0.514622
Pdpn	0.512969
Cntnap1	0.51275
Tgfb1	0.512468
Ifit2	0.508559
Pi4k2b	0.50855
Cth	0.508395
Prdx6	0.50725
Plac8	0.50683
Dnajc22	0.506087
Secisbp2l	0.504981
Rasgrp3	0.503791
Ly6c1	0.503285
Rtkn2	0.500888
Atp6ap2	0.500857
Sc5d	0.500322
Atp10a	0.500224
Tmem74	0.499802
Slco3a1	0.498863
Aldh3b1	0.498502
Cyp51	0.496774
Lhfpl2	0.496646
Klf2	0.494726
Gpr176	0.49287
Pcyt1b	0.491813
Ddit3	0.491221
Cst3	0.490917
Cdk2ap2	0.490747
Mast4	0.490545
Tmem154	0.490092
Hsd17b7	0.490053
Cited2	0.489568
Zcchc2	0.489237
Ifngr2	0.489058
Xylt1	0.488952
Ly6a	0.488154
Cdc25b	0.487458
Btg3	0.487108
Tead4	0.486708
Stat5a	0.485229
Tuba4a	0.484325
Ctsl	0.481833
Uvrag	0.481459
Fdps	0.481448
Col18a1	0.480568
Pdxk	0.477856
Ttll7	0.475807
Tagln2	0.475321
Smim3	0.474873
Arhgap22	0.474664
Emb	0.473519
Frrs1	0.473189
Slc9a3r1	0.472921
Higd1a	0.471786
Lpgat1	0.470874
Sdc1	0.468127
Cd47	0.4675
Slfn9	0.467222
Abhd5	0.466881
Aldoa	0.466869
Perm1	0.466022
Zfp365	0.464181
Enpp4	0.463271
Fbxl5	0.463266
Crlf2	0.463188
Spn	0.463184
Nek2	0.462852
Ptpn2	0.462624
Pnp	0.459923
Trib3	0.459123
Nab1	0.458999
Serpinb9b	0.458243
Gsr	0.458241
Cdk6	0.458136
Ifnar2	0.458045
Ifrd1	0.456615
Slc12a2	0.456014
Cdkl2	0.455389
Ubald2	0.454939
Tgfbr1	0.452721
Atp6v0b	0.452177
Scg5	0.449928
Eno1	0.448057
Eif4e3	0.4476
Ikbke	0.447569
Nfkb2	0.447133
Dnajb6	0.447129
Cd34	0.44682
Thg1l	0.446298
B3gnt9	0.446227
G6pdx	0.446038
Pkm	0.445224
Gsdmd	0.44504
Btg1	0.444649
Atg12	0.443987
Spry1	0.443803
Gys1	0.443536
Dock4	0.443111
Kng1	0.44279
Daxx	0.442787
Plekhn1	0.442509
Mcur1	0.442193
Cndp2	0.441562
Lgals8	0.441195
Itpripl2	0.440117
Map2k1	0.439157
Tmem251	0.437777
Naglu	0.437179
Egr1	0.437036
Procr	0.436442
Itga7	0.435894
Slc25a5	0.434361
Fam117b	0.434166
P2rx7	0.433998
Slc10a6	0.433953
Map3k5	0.432878
Ddx24	0.431747
Hapln4	0.43116
Ppp1r3e	0.431135
Pgm2	0.430278
Slc45a4	0.429812
Icosl	0.428843
Gopc	0.427817
Nsdhl	0.427759
Nus1	0.42746
Ap3s1	0.426763
Mid1ip1	0.426612
Guca1a	0.42623
Gpr137b	0.425896
Phf19	0.425272
Mxra8	0.424119
Tnfrsf12a	0.423824
Fxyd5	0.423053
Glmp	0.422936
Rassf8	0.42257
Traf3ip2	0.42235
Rassf2	0.421546
Sh3pxd2b	0.421471
Slc7a3	0.421357
Hivep2	0.421101
Tmem119	0.420899
Gramd1b	0.419374
Hsdl1	0.418907
Tex264	0.418836
Gtf3c5	0.416899
Rragb	0.415725
Psme1	0.415705
Cap2	0.414981
Crem	0.41495
Znrf1	0.41464
Gls2	0.413453
Ptx3	0.412794
Sipa1l1	0.412743
Gpc4	0.412698
Abcc1	0.412619
BC030867	0.412564
Ecscr	0.411974
Sh3bgrl2	0.411852
Tnip1	0.411113
Ankrd37	0.41004
Nfkbib	0.410013
Aida	0.409718
Bsg	0.408679
Sgcb	0.408068
AI413582	0.407434
Srd5a3	0.407028
Lrrc61	0.405978
Lrig2	0.405623
Slc41a2	0.405509
Fgfr1	0.405491
Cebpd	0.404642
Pla2g12a	0.402342
Ankrd34a	0.402253
Tmem243	0.402236
Wbp2	0.402103
Vegfa	0.401749
Foxred2	0.401395
Idnk	0.401322
Mfsd2a	0.400658
Nfkbie	0.400446
Irf2bp2	0.400311
Ecm1	0.399584
Arl4c	0.398173
Mark1	0.397991
5730508B09Rik	0.397827
Egln1	0.397473
Tmem63a	0.39736
Sox5	0.39684
Catip	0.39678
Mina	0.395841
Foxo3	0.395263
Itpk1	0.395068
Qpct	0.394781
Pgam1	0.394589
Mesdc1	0.394586
Idi1	0.39276
Tma16	0.392241
Gnptab	0.391655
Cd274	0.39057
Tbcel	0.390457
Atp6v1c1	0.390233
Gba	0.389962
Pvr	0.389815
Lamp1	0.389649
Amdhd2	0.389262
Mafg	0.388853
Gpi1	0.388192
Slc27a1	0.387737
Spidr	0.387364
Fancc	0.387105
Ube2cbp	0.386848
Creb5	0.386826
Zfp775	0.386008
Pde4b	0.38541
Atp2b1	0.385403
Tfap4	0.385198
Depdc1b	0.385154
Tmem45a	0.384509
Oip5	0.384458
Pdgfrb	0.383348
Gng12	0.383229
Slc20a1	0.383218
Psme2	0.383215
Fam102b	0.383044
Rcl1	0.382968
Kcnab1	0.38284
Ccl27a	0.382692
Ggct	0.381522
Lyn	0.381294
St7	0.380882
Tpi1	0.380734
Fam63a	0.380526
Slc25a29	0.380147
Gstk1	0.378964
Ctsa	0.378789
Bgn	0.378339
Vma21	0.377931
Vat1	0.377818
Pigw	0.377755
Postn	0.377701
Dusp3	0.377428
Cox18	0.376564
Maff	0.376377
Tmem192	0.376221
Cr1l	0.376196
Abhd17c	0.375773
Clip2	0.375318
Il1r1	0.374505
Ttc7b	0.37408
Car13	0.373857
D430019H16Rik	0.373218
Traf5	0.372868
Cln8	0.372801
Uchl1	0.372652
Slc30a4	0.372576
S1pr2	0.37209
Hmgn3	0.371713
Serpinb1b	0.371705
Ppp4r2	0.371055
Map4k4	0.370014
Wdfy1	0.36913
Fam20a	0.369127
Cnppd1	0.368927
Ttc32	0.368836
Dtwd1	0.368507
Orc1	0.368367
Taf4b	0.367964
Cgref1	0.367953
Dab2	0.367597
Slc48a1	0.367499
Flcn	0.366989
Elovl4	0.366808
Bbc3	0.365812
Ang	0.364964
Tor1aip2	0.364667
Rsph3b	0.36451
Lonrf3	0.363839
Ucp2	0.363655
Bckdhb	0.363638
Gm20939	0.363094
Erich1	0.362915
Degs1	0.362878
Aven	0.362167
Mcoln1	0.361802
C1ra	0.361296
Abcb8	0.360848
Polm	0.360827
Rnd1	0.360697
Galk1	0.360227
N4bp1	0.359972
Sorcs1	0.359891
P2rx3	0.359832
Psme2b	0.359799
Spsb1	0.359749
Lrba	0.359601
Atp6v1h	0.359565
Trip13	0.359022
Rnf115	0.358901
Pnrc1	0.358251
Prkg2	0.358051
Rufy1	0.357848
Mmp14	0.357791
St3gal1	0.357725
Mfsd1	0.357134
Wdyhv1	0.355004
Gsap	0.354958
Slc8b1	0.354758
Adarb1	0.354315
Zhx2	0.35352
D17H6S56E-5	0.353006
Ccl11	0.352876
Dph1	0.351224
Azin1	0.350895
Gorab	0.350167
Irx2	0.349691
Pqlc2	0.349011
Utp14b	0.34897
Xdh	0.348399
Steap3	0.348204
Tob1	0.348182
Glb1	0.348032
Irf2	0.347718
Saysd1	0.347198
Tpp1	0.345967
Nub1	0.345541
E430025E21Rik	0.345215
Steap1	0.344681
B4galt5	0.344208
Zfp36l2	0.343339
Gnpda1	0.343224
Cyth3	0.343083
Nod1	0.342411
Snx8	0.341547
Ccdc91	0.341542
Hsd17b12	0.341511
Vasn	0.341104
Nudt9	0.341022
Bin1	0.3389
Gngt2	0.338879
Cers2	0.338699
Psmg4	0.338515
Vps26a	0.337922
Myo10	0.337886
Fam134b	0.337137
Coq2	0.337047
Pemt	0.336528
Acsl3	0.336492
Galk2	0.336427
Ngf	0.336306
Gpsm3	0.336299
Plekhh3	0.336274
Chac1	0.335565
Klf13	0.335095
Ogfod3	0.335073
Tmbim1	0.334861
Grina	0.334324
Ppp1cb	0.333733
Snhg11	0.333732
Tnfsf11	0.333165
Nudt19	0.333023
Igfbp3	0.332862
D16Ertd472e	0.332533
Stxbp1	0.332157
Prkar2b	0.331654
Nt5e	0.330967
Lck	0.330752
Inhba	0.330213
Parp8	0.33005
Raet1e	0.33001
Scly	0.32992
Prdx5	0.329757
Lactb2	0.329466
Vegfb	0.329466
Akr1b3	0.329414
Lancl2	0.329069
Pdxp	0.328966
Zcchc4	0.328432
D030056L22Rik	0.327614
Tnfsf9	0.32653
Nme6	0.32645
Il10rb	0.326303
Pmvk	0.326128
Tmem97	0.325902
Parp3	0.32565
Psd	0.325206
Trafd1	0.325127
Trmo	0.324772
Col4a1	0.324771
Capg	0.324468
Ldlrap1	0.324417
Sord	0.324051
Atp6v1d	0.32397
Arrb2	0.323906
Arhgap31	0.323842
Btg2	0.323589
Ccdc57	0.323471
Pcdh19	0.323414
Srxn1	0.323087
Fjx1	0.322895
Helq	0.322845
Smox	0.322326
Cpeb1	0.321978
Ttc39b	0.321974
Serpinf1	0.321856
Mxi1	0.321768
Card19	0.321605
Hif1a	0.321575
Atm	0.321401
Cox7a1	0.321205
Ap5s1	0.321121
Rcor2	0.320982
Asf1b	0.320711
Gcnt4	0.320529
Arhgap11a	0.320496
Cfap69	0.320159
Arrdc4	0.320057
Azi2	0.319933
Acot10	0.319796
Traf2	0.319447
Shmt1	0.319446
C1galt1c1	0.319365
Myo1b	0.318943
Pde10a	0.318935
Slc35g1	0.318856
Rdh11	0.318473
Layn	0.318311
Fam107b	0.318101
Rgs19	0.318002
Snx9	0.317597
Acadl	0.317394
1600002K03Rik	0.317348
Clcn3	0.317158
Diaph2	0.316867
Nudt17	0.316289
Abhd6	0.316117
Trim56	0.31592
Rpn2	0.315479
Ckap2l	0.315011
Mapre2	0.314901
Bri3	0.31487
Pabpc1	0.314584
Mtdh	0.314234
Uck2	0.313877
Rab31	0.313397
Cnbd2	0.313024
Nadk2	0.312756
Tmem199	0.31237
Ebp	0.311649
Epb41l3	0.311365
Nfe2l1	0.311272
Kif2c	0.311086
Ccnyl1	0.310964
Rnf114	0.310894
Stx3	0.310802
Pfkl	0.310206
Plk3	0.309499
Smyd3	0.309102
Mcm10	0.308532
Slc25a22	0.308239
Homer1	0.308114
Rnf217	0.307947
Ankrd12	0.307865
Acsl1	0.307577
Fgfr1op	0.307495
Fam50a	0.306893
Ctsz	0.30677
Rhog	0.306708
Rab15	0.306588
Ninj1	0.306491
Cdc42ep3	0.306147
Nuak1	0.306061
Usp6nl	0.305995
Ednra	0.305213
Col6a3	0.30516
Twistnb	0.305033
Neurl2	0.3049
Slc6a8	0.304665
Ddrgk1	0.304331
Adgrg2	0.304225
Ctsd	0.303893
Cox4i2	0.303602
Fkrp	0.302932
Cpeb3	0.302915
Mrpl38	0.302774
Fam129b	0.302727
Gas1	0.30253
Pak3	0.301793
Stx11	0.301418
Mastl	0.301293
Icam5	0.301293
Ap4s1	0.300626
Sqle	0.300589
Nceh1	0.30037
Shq1	0.299385
Hspa1a	0.29855
Psap	0.298521
Gapdh	0.298108
Bcl7a	0.297871
Hyls1	0.297621
Ctage5	0.297426
Ppp1r15b	0.297403
Tom1	0.297291
Hist1h2bc	0.29723
Col4a2	0.297115
Prss16	0.296763
Zfp281	0.296756
Slc25a13	0.296301
Timm10	0.2962
Cklf	0.296134
Nxt2	0.296013
Tmem2	0.295925
Gypc	0.295739
Phactr1	0.294703
Pex7	0.294695
Nomo1	0.294551
Tmsb15l	0.294363
Hdac5	0.294254
Tbrg1	0.294081
Per2	0.293674
Pcdhgc3	0.293532
Acsl5	0.293406
Sqstm1	0.293341
Rhbdf1	0.293288
Hspa4l	0.292821
Utp23	0.292614
Kdsr	0.292374
Utp18	0.292071
Nfe2l2	0.292027
Atp6ap1	0.292026
Chrnb1	0.291561
1190007I07Rik	0.291416
Rnaset2a	0.291257
Hipk2	0.291064
Setdb1	0.29051
Pkp4	0.290472
Dnajc2	0.290343
Slc25a33	0.29015
Ldlr	0.290133
Mfsd11	0.289751
Bcl2l1	0.289654
Alg2	0.28955
Mettl3	0.289407
Ier2	0.289094
Akap1	0.288914
Wdr81	0.288862
Scd1	0.288832
Lemd2	0.288746
Hvcn1	0.28872
Ccnh	0.287975
Hspb8	0.287732
Rbpms2	0.287661
Nhp2	0.287577
Rhoq	0.287556
Gtf2e2	0.287496
Pitpnm1	0.287455
Eef1e1	0.287389
Tnfrsf4	0.28736
Tmem181a	0.287262
Eaf1	0.287068
Dnm1	0.286927
Tmem158	0.286456
Cox17	0.286084
Map3k8	0.285655
Dusp23	0.285321
Atp6v1b2	0.285055
Trim8	0.284893
Cry1	0.284864
Sdad1	0.284817
Adamts14	0.284763
Ly96	0.284758
Noc2l	0.284391
Coprs	0.283494
Tmem62	0.283393
Tuba1c	0.283274
Dagla	0.283145
Them6	0.282945
Mthfd2l	0.282899
Max	0.28277
Ranbp9	0.282447
Cers4	0.282213
Impact	0.282202
Ubtd2	0.282042
Tmem55b	0.281635
Csrnp1	0.281574
Sec16b	0.281175
Ptges2	0.280994
Il17rc	0.280841
Prr11	0.280838
Fam129a	0.280633
Agpat5	0.280436
Cav2	0.280263
Ftsj3	0.279565
Rgs16	0.279512
Cdc45	0.279452
Qtrt1	0.279321
Dlg2	0.27923
Mnd1	0.279143
Elmod2	0.278961
Dhcr24	0.278938
Yrdc	0.278905
Lin54	0.278738
Pgd	0.278256
Gng8	0.278083
Ube2q1	0.277621
Rel	0.277614
Ndel1	0.277512
Tsc22d1	0.2774
Trim39	0.27736
Adam17	0.277304
Mtpn	0.277271
Chst2	0.277211
Lamtor1	0.277114
Brox	0.276881
Zfp764	0.276715
Sirpa	0.276072
Cdca5	0.275983
Grhpr	0.27535
Hs1bp3	0.275331
Dpy30	0.273946
Tapbpl	0.273739
Mbnl3	0.273648
Paqr7	0.273508
Foxs1	0.272672
Noa1	0.272322
Rbm47	0.272288
Nsun2	0.272187
2010111I01Rik	0.272178
Svil	0.271735
Slc10a3	0.271514
Tmed8	0.271428
Mat2b	0.271384
Ccdc92	0.271251
Nfil3	0.271138
Exosc1	0.270993
Slc16a10	0.270945
Armcx1	0.270851
Cd9	0.270789
Nabp1	0.270636
Zfp658	0.270628
Gnptg	0.270283
Mrps18a	0.270181
Stx6	0.270143
Lclat1	0.270084
Fbxo7	0.270068
Slc7a1	0.269857
2700094K13Rik	0.269592
Lipt1	0.269499
Runx1	0.26927
Abhd1	0.269259
Chst11	0.268971
Plekhf2	0.268857
Gid4	0.268841
Cav1	0.268624
Enkd1	0.268566
Car12	0.268182
Papd7	0.268164
Zfp819	0.268079
Ubxn8	0.267646
Hk2	0.267637
Rnh1	0.267211
Lrrfip2	0.267108
Rab21	0.266988
Cisd2	0.266937
Gadd45b	0.266757
Mgst2	0.26645
Cirh1a	0.266231
Gns	0.265211
Rabggta	0.265196
Gpsm2	0.265056
Vps13c	0.265042
Tbc1d15	0.264981
Hsph1	0.264862
Hccs	0.264832
Sestd1	0.264823
Abcf2	0.264241
Defb25	0.263898
Mef2d	0.263732
Scamp2	0.263324
Dusp22	0.26332
Spata13	0.262866
Tagap1	0.262791
Rhob	0.26271
Soat1	0.262524
Fam21	0.262516
Rnf126	0.262281
Agpat2	0.262118
Imp4	0.261947
Tank	0.261554
Utp14a	0.261186
Ormdl2	0.261074
Ankfy1	0.261045
Anp32b	0.261039
Dsn1	0.260674
Mvd	0.26062
Wdr62	0.260593
Vcam1	0.260426
Otud4	0.260216
Mrpl27	0.260212
Sltm	0.259973
Acot9	0.259872
Ndc80	0.259756
Agap1	0.259708
Ets1	0.259165
Zmynd19	0.259128
Troap	0.25911
Acot7	0.259062
D930015E06Rik	0.258399
Tsacc	0.258051
Pcx	0.257917
C1s1	0.257358
Dync1li1	0.257134
Rwdd2b	0.257113
Mlx	0.257042
Fyco1	0.256916
Arhgef3	0.256811
Hoxb7	0.256528
Itm2b	0.256425
Klhl21	0.256268
Dcxr	0.256025
Naa20	0.255938
Xylb	0.25578
Dusp16	0.255428
Stx4a	0.255305
Cir1	0.255289
Panx1	0.255285
Cycs	0.255059
Scd2	0.254905
Tuba8	0.254826
Etv4	0.254759
Knstrn	0.254717
BC100451	0.254312
2810428I15Rik	0.253824
Usp53	0.253462
Nagpa	0.253214
Aurka	0.252968
Osgin2	0.252527
Rabggtb	0.252498
Serpine2	0.252478
Rrp7a	0.252301
Mrps30	0.2523
Il20rb	0.252138
Rnpepl1	0.251793
Ssr4	0.251272
Gas2l3	0.251241
Mrto4	0.250996
Irx1	0.250987
Top1mt	0.250979
Ddx18	0.250298
Arid3b	0.249995
Dnaaf5	0.249933
Tcirg1	0.249638
Echdc3	0.249564
Nr2c2ap	0.249178
Aacs	0.248738
Dpagt1	0.248681
Msmo1	0.248344
Rpl36al	0.248228
Smim13	0.248152
Bri3bp	0.24809
Ndc1	0.247905
Sephs2	0.247112
Lsm11	0.246897
Ralbp1	0.246827
Stat6	0.246435
Mbtps2	0.246427
Rdh12	0.246333
Prelid1	0.246146
Dnajc21	0.245921
Ica1	0.245869
Adipor2	0.245572
Stip1	0.245389
Dnase1l1	0.24518
Trmt6	0.245039
Zfp800	0.24495
Pus1	0.244891
Aspscr1	0.244793
Dhfr	0.244764
Fancf	0.244753
Arhgef6	0.244734
D1Ertd622e	0.244713
Tbc1d10a	0.244618
Ttll5	0.244283
Fam110a	0.244187
Creld2	0.243928
Slc25a25	0.243788
Tgm4	0.243734
Uchl5	0.243614
Abr	0.243598
Nufip1	0.24355
Mrpl54	0.243525
Irak1bp1	0.243233
Ube2t	0.243185
Nsmce2	0.24315
Eml1	0.243045
Rpf1	0.242814
Lsm4	0.242808
Tbc1d13	0.24253
Foxn2	0.242468
Pcdhgc5	0.242337
Alg1	0.242291
Acly	0.242279
Slc29a1	0.242205
Rad52	0.241939
Mb21d1	0.24193
Galm	0.241887
Dtd1	0.241858
Zfp52	0.241743
Polr3e	0.241639
0610007P14Rik	0.241631
Commd10	0.241535
N6amt1	0.241412
Ero1lb	0.241238
Aunip	0.241169
1700088E04Rik	0.241053
Phf10	0.241017
Cops7a	0.240963
D10Wsu102e	0.240908
Eml2	0.240769
Whamm	0.240704
Nudt5	0.240416
Depdc1a	0.240314
Ctns	0.240229
Alg8	0.240017
Siah2	0.239979
Spire2	0.23988
Car6	0.239811
Gpn2	0.239283
Hmgcr	0.239218
Ubald1	0.239147
Xrn2	0.2391
Dock11	0.239067
Grsf1	0.238813
C2cd2l	0.238779
Vps29	0.238157
Nop14	0.237758
Arl8a	0.237757
Med11	0.237655
Hdgf	0.237609
Il6ra	0.23747
Gnl1	0.237429
Tpd52	0.237302
Prdx4	0.237174
Junb	0.237094
Fbxo47	0.236943
Imp3	0.236865
Ier5	0.236684
Mrps18c	0.236642
Tgfbr3	0.236571
Mfsd7a	0.236248
Lpin1	0.236043
Dlgap5	0.235762
AY074887	0.235696
3110001I22Rik	0.235688
Gstp1	0.235504
Nfx1	0.235332
Aimp2	0.235267
Sepw1	0.235209
Creg1	0.235011
Cept1	0.234896
Bcl10	0.234891
Klhl2	0.234703
Daglb	0.234416
Ppt1	0.234405
Dph6	0.234246
Lonrf1	0.233887
Sirt1	0.23369
Kti12	0.23345
Gtf2f1	0.233294
Znrd1as	0.233207
Cables2	0.233188
Ciz1	0.233118
Il13ra1	0.233043
Rab39b	0.232964
B3gnt2	0.232478
Timm23	0.232432
Kif23	0.232397
Klf5	0.232388
Usp31	0.232348
Pdia5	0.232051
Il3ra	0.231893
Trp53	0.231283
Npl	0.231266
Arrdc1	0.231165
Hspa9	0.231036
Mtf2	0.230951
Nubp1	0.230926
Cutc	0.230834
Zfp367	0.23082
Hps3	0.230607
Mmadhc	0.230598
Myo1h	0.230546
Maob	0.230526
Dnaja4	0.230459
Tmppe	0.230208
Aebp1	0.23019
Letm1	0.229893
Borcs7	0.229866
Naa25	0.229716
N4bp3	0.229675
Utp15	0.229521
Pcyt2	0.229412
Plekho2	0.229158
Kansl2	0.229094
Mgp	0.228945
Pbdc1	0.22861
Peak1	0.228553
Nars2	0.228522
Spns1	0.228424
Tmem189	0.228368
Shmt2	0.228251
Usp32	0.228202
Ddx28	0.228182
Ncapg2	0.228086
Ttk	0.227887
Syne3	0.227875
Lrfn4	0.227764
Ppa1	0.227705
Ercc6l	0.227665
Egfl7	0.227396
Rnd3	0.227276
Insig2	0.22715
Tmed5	0.227021
Eif5	0.226852
Mtm1	0.226328
Fam57a	0.226168
Dnph1	0.226082
Fam134a	0.226005
Gtf2a1	0.225972
Ccpg1os	0.225972
Chd1l	0.225901
Ppp1r14b	0.225509
Iffo2	0.225507
F8a	0.225377
Myadm	0.225299
Rsl1d1	0.225068
Orai2	0.225044
Cstf2	0.22486
Anxa5	0.224719
Zwint	0.224224
Pmf1	0.224171
Atp6v0c	0.224137
Wdr61	0.224135
Wdr54	0.223847
Sft2d1	0.223836
Pcna	0.223655
Scpep1	0.223444
Sgpp1	0.223356
Slc37a4	0.223319
Dus2	0.223276
Opa3	0.223177
Ubc	0.223115
Kdm3a	0.223003
Ppp1r15a	0.222911
Trim37	0.222641
Mthfsl	0.222583
Ppif	0.222534
Slmo2	0.222464
Hagh	0.222396
Gnl3	0.222346
Mafk	0.222321
Arl8b	0.222008
Cdca8	0.221993
Dnajb11	0.221852
Lsm14b	0.221825
Nubp2	0.221733
Clcn7	0.221726
Klf6	0.221717
Ahr	0.221632
Bnip1	0.221456
Zfp462	0.221362
Mapkbp1	0.221345
Bbs7	0.221269
BC022687	0.221258
Gmfb	0.22125
Slc25a20	0.221204
Plp2	0.221112
Rnf220	0.22094
Sh2b3	0.220783
Tsr3	0.220727
Ifitm5	0.220385
Pip4k2c	0.220367
Ptrhd1	0.220124
Kansl1l	0.220124
Pdpr	0.219876
Ydjc	0.219852
Kdm7a	0.219822
Mfhas1	0.219376
Tgoln2	0.219362
Wdr3	0.219051
Mnt	0.218969
Rhbdd1	0.218945
Fmn1	0.21891
Ngly1	0.218749
Coa7	0.218623
Pttg1	0.218606
Lrp8	0.218171
Acvr1b	0.218151
Lyplal1	0.218144
Ccnb1	0.218057
St7l	0.217988
Clcn6	0.217962
Ahcyl2	0.217712
Ddx55	0.217502
App	0.217499
Hgh1	0.217197
Pqlc3	0.217196
Zfp532	0.217107
Mesdc2	0.216929
Ifnar1	0.216561
Cenpv	0.21653
E2f2	0.21643
Abcb6	0.216399
Rce1	0.216236
Cdca7l	0.216136
Jmjd6	0.21566
Alcam	0.215644
Prss22	0.215633
Wdr4	0.215308
Eif2b2	0.215243
1110008F13Rik	0.214952
Trmt112	0.214925
Selk	0.21465
Fam219a	0.214495
2700062C07Rik	0.214436
Faim	0.214329
Nnmt	0.21412
Mrps2	0.214012
Gtf2h2	0.213987
Fastkd5	0.213888
Nol8	0.21378
Stk4	0.213617
Angptl6	0.21353
Hexb	0.213452
Gas2l1	0.213353
Bcl7b	0.213001
Slc35a3	0.212748
Rmi2	0.212649
Mfsd5	0.212563
Slc25a26	0.212504
Mak16	0.212095
Pin4	0.21193
Sptssa	0.21187
Atrn	0.211766
Lrrc27	0.211535
Mtcl1	0.211518
Alas1	0.211203
Dusp7	0.211112
Hmbs	0.210965
Pnpla2	0.210847
Bbs5	0.210507
Dbf4	0.210413
Ccl25	0.210222
Rbpj	0.2102
Foxp1	0.210042
Ddhd1	0.209976
Dcaf13	0.209929
2810004N23Rik	0.209698
C1qbp	0.209672
Osbpl2	0.209594
Swsap1	0.209518
Kif20b	0.209512
Dars	0.209397
Ppp3cc	0.209044
Slc6a9	0.208802
Acat2	0.208733
G6pc3	0.208474
Cox7c	0.208057
Atp6v1g2	0.208015
Arl5b	0.207964
Polr3h	0.207942
Gpx1	0.207843
Krcc1	0.207812
S1pr3	0.207652
Tmem107	0.207609
Aplp2	0.20736
Rab7	0.207327
Ebag9	0.207087
Pusl1	0.207083
Mdn1	0.206913
Ahi1	0.206871
Pmm2	0.206656
Fam120c	0.206568
Ubl3	0.2065
Chaf1b	0.206391
Sipa1l2	0.206294
Plk1	0.20622
Nqo2	0.206116
Ndufaf6	0.205992
Tnfrsf14	0.205975
Phf6	0.205896
Eif4e2	0.205508
Zbtb7b	0.205387
Sik3	0.205087
Lbr	0.204879
Tmem79	0.204855
Fnip1	0.204465
Pcdhga10	0.204429
Ube2g1	0.204328
Hilpda	0.204257
Chmp2b	0.204165
1810011O10Rik	0.20382
Pcgf1	0.203567
Oxsr1	0.203477
Txn2	0.203468
Asna1	0.203438
Setdb2	0.203229
Peg10	0.203143
Polr1a	0.203101
Jmy	0.203039
Pola2	0.202971
Oser1	0.202946
Gpatch4	0.202797
Dnaja3	0.202698
Grb14	0.202441
Sar1b	0.202326
Kpna1	0.202317
9130401M01Rik	0.202293
Mfsd7b	0.202203
Sfxn2	0.201964
Gnpnat1	0.201946
Slc27a4	0.201635
Pdcd2	0.201616
Gsg2	0.201539
Lpar2	0.201537
Rcc2	0.201387
Hk1	0.201308
Ipo4	0.201179
Lbh	0.20088
Sema4a	0.200853
Zfp292	0.200671
Recql4	0.200388
Lmcd1	0.200327
Fut8	0.200306
Afg3l2	0.200259
Nle1	0.200035
Trip6	0.199859
Tmem68	0.199734
Retsat	0.19973
Ndufa1	0.199359
Pnpla7	0.199286
Srebf1	0.199262
Wdr75	0.199158
Esf1	0.199142
Dkc1	0.199061
Ifrd2	0.198986
Ube3c	0.198772
Gcnt2	0.198575
Cep55	0.19848
Wipi2	0.198461
Dgkd	0.198026
Incenp	0.198011
Lmtk2	0.197882
Gtf2h1	0.197818
Snx2	0.197813
Phip	0.197634
Fdxacb1	0.197621
Rabif	0.197487
Hsp90ab1	0.197393
Polr2g	0.197306
Vars	0.197282
Stk24	0.197224
Lin9	0.197107
Clip1	0.197021
Pml	0.196867
Myof	0.196812
Crabp2	0.196774
Apcdd1	0.196773
Elf1	0.196736
Seh1l	0.196682
Stard4	0.196591
9030624J02Rik	0.196543
Ube2m	0.196284
Stard3	0.196108
Ccne2	0.196094
C330027C09Rik	0.196078
Rbm38	0.19604
Ppat	0.196031
Sav1	0.195955
Hat1	0.195897
Ndst2	0.195815
Lifr	0.195801
Cnot7	0.195699
Ppm1a	0.19566
Ccna2	0.195653
Uhrf1	0.19557
Slc35c1	0.195471
Trim26	0.195411
H3f3b	0.195195
Espl1	0.195172
Zbtb21	0.195088
Rsph3a	0.19497
Plpp1	0.194967
Pptc7	0.194904
Nsrp1	0.194861
Dusp28	0.194738
Nol12	0.194688
Mocs1	0.194687
Mrps6	0.194614
Wipf1	0.194589
Ybx3	0.194589
Cenpa	0.194468
Mvb12a	0.194435
Ripk3	0.194331
Exoc3l4	0.194209
Orc5	0.19408
Kif14	0.194031
Anln	0.193926
Chchd4	0.193782
Cks2	0.193765
Snapc1	0.193705
Tmem81	0.193673
Lgals1	0.193596
Rnf11	0.193542
Litaf	0.193514
Cenpn	0.193492
Nacc2	0.193354
Ostf1	0.193124
Psmc2	0.19308
Pten	0.193005
Daam1	0.192789
Ccnf	0.192748
Rnf25	0.192535
Jade3	0.192475
Nr3c1	0.19241
Man2b1	0.192196
Psmf1	0.192005
Nolc1	0.191707
Gmpr	0.191703
Hspa8	0.191525
Tex2	0.191189
Larp1	0.191137
Ing5	0.191064
Fam64a	0.190899
Eif6	0.19087
Lrrn4cl	0.190828
Adssl1	0.190827
9130011E15Rik	0.190606
Pnpt1	0.190477
Gpd2	0.190369
Ddx26b	0.190277
Kctd10	0.190161
Slc23a2	0.190143
Hmgb2	0.190111
Fam49b	0.190001
Asxl2	0.189734
Eea1	0.189687
Chka	0.189686
Cyb561d2	0.189678
Limd2	0.189637
Stxbp2	0.189484
Mkks	0.189353
Smcr8	0.18933
AK010878	0.189316
AW209491	0.189256
Vapa	0.18895
Timm8b	0.188742
Atp6v1a	0.188687
Hspa1l	0.188508
Ing1	0.188481
Clp1	0.188285
Manf	0.188265
Tmem185b	0.18799
Ddx31	0.187806
Ms4a4d	0.187718
Dcbld1	0.18766
Spata5	0.187587
Tyw5	0.187458
Adpgk	0.187358
Usf2	0.187321
Gabpb2	0.187101
Fbxl15	0.187089
Ppp4r1	0.187087
Vrk1	0.18706
Tmem38b	0.187031
Farsb	0.187014
Secisbp2	0.186767
Got1	0.18666
Kat2a	0.186649
Adrbk1	0.186555
Sertad4	0.186456
Dut	0.186449
Rtfdc1	0.186402
E2f1	0.186329
Foxm1	0.186237
Hspd1	0.186104
Stk40	0.186002
Cd151	0.185974
Psen2	0.185906
Pgs1	0.185854
Gaa	0.185817
Slc25a1	0.185783
Asb13	0.18578
Tomm20	0.185767
Tmx1	0.185739
Ddx41	0.18559
Zfp949	0.185543
Papd5	0.185424
Tmem170b	0.185415
Smg7	0.185413
2210016F16Rik	0.18523
E2f4	0.185075
Satb2	0.184977
Mns1	0.184843
Cask	0.184778
Cdv3	0.184699
L3mbtl2	0.184637
Birc5	0.184482
Btbd6	0.184448
Anapc11	0.18425
Ercc6l2	0.18422
Zcrb1	0.184163
Fads1	0.184148
Rrbp1	0.184097
Ctdp1	0.183853
Arpc5l	0.18383
Metap1	0.183815
Ino80c	0.183768
Nol9	0.183589
Htatip2	0.183458
Tbk1	0.18315
Chpf	0.183126
Hectd1	0.182994
Nat14	0.182915
Rae1	0.182804
Serpina3i	0.182793
BC048403	0.182421
Eif1ax	0.182415
Dennd6b	0.182341
Ptcd2	0.182215
Cyb5b	0.182157
Rhebl1	0.182051
Dhrs1	0.181741
Syne1	0.181636
Hacd1	0.181627
Mtrr	0.181567
Aurkb	0.181466
Cpsf2	0.18144
Zdhhc6	0.181278
Sf3b4	0.181221
Mis18bp1	0.18114
Arih2	0.181036
Sfxn3	0.18093
Zfp933	0.180869
Me2	0.180853
Adat1	0.180789
Spg7	0.180641
Syce2	0.180596
Lace1	0.180586
E2f8	0.180534
Rps19bp1	0.180366
Ly75	0.180303
Nploc4	0.180221
Gtf2ird2	0.179911
Dhrs13	0.179852
Srebf2	0.179768
Tmem221	0.179456
BC023829	0.17936
Cep57	0.179356
Rhbdd3	0.179184
Srpr	0.179122
Crnkl1	0.179096
Por	0.178926
Fasn	0.17887
Apitd1	0.178846
Fastkd2	0.17872
Ncl	0.178674
Eif2s1	0.178623
Rragc	0.178612
Cmtm3	0.178531
Hnrnph2	0.17853
Hspa12b	0.17828
Ide	0.178131
Fam195a	0.177765
Med24	0.177663
Coasy	0.177469
Nckap1	0.177439
Rffl	0.177401
Tmem237	0.177372
Nfatc2ip	0.177365
Sepsecs	0.177356
Fads2	0.177279
Xlr3b	0.177109
Camk2n2	0.176954
Exosc5	0.176908
Dnajc13	0.176752
Cep104	0.176705
Lmna	0.176459
Irf1	0.176447
Vps37c	0.176297
Cep135	0.17627
Nip7	0.176222
Epha2	0.176153
Sde2	0.176065
Grpel2	0.176044
Cd82	0.176022
Tex30	0.175958
Ddx54	0.175888
Arl4d	0.175829
Chrac1	0.17581
Zdhhc16	0.175736
Fam171b	0.175682
Emc4	0.175669
Ppan	0.175632
Pdk3	0.175603
Clptm1l	0.175499
Tmbim6	0.1754
Tmem120b	0.175377
Lef1	0.175354
A730008H23Rik	0.175311
Mrpl39	0.175302
Ehd1	0.175286
Ect2	0.175224
Ttc9c	0.175162
Rab22a	0.175108
Smg9	0.175043
Dock9	0.175028
Got2	0.175006
Eif1	0.17498
Trappc4	0.174959
Tfpi	0.174932
Dhrs7	0.1747
Eif3a	0.174585
Nkap	0.174443
Tfpi2	0.174352
Itpripl1	0.174207
Cenpi	0.174091
AW549877	0.173913
Foxf2	0.173847
Sh3d21	0.173803
Alg13	0.173772
Ak6	0.173675
Rftn1	0.173417
Sgf29	0.173414
4930402H24Rik	0.173343
Fen1	0.173323
Siah1b	0.173271
B4galnt4	0.173251
Ccdc137	0.17321
Heatr1	0.173023
Tmem60	0.172903
Zfp64	0.172802
Gusb	0.172775
Nars	0.172647
Hid1	0.172492
Amd2	0.172415
Nusap1	0.172372
Atad3a	0.172358
[truncated: 8,760 more rows]
