# Supplementary material for: Squamous trans-differentiation of pancreatic cancer cells promotes stromal inflammation
Source: eLife. 2020 Apr 24;9:e53381. doi: 10.7554/eLife.53381 (PMC7200154; doi:10.7554/eLife.53381)
Supplement: Supplementary file 2. — Tab-1 (iCAF gene signature): List of 200 mouse genes corresponding to the iCAF gene signature. Tab-2 (myCAF gene signature): List of 200 mouse genes corresponding to the myCAF gene signature. [file elife-53381-supp2.xlsx]

## Sheet: iCAF gene signature
Gene_ID
Saa3
Hp
Cxcl5
Serpina3n
Fgf23
Il13ra2
Steap4
Nos2
C3
Cxcl1
Mmp13
Lcn2
Lum
Rarres2
Dcn
Mmp3
Cp
Csf3
Serpina3i
Chl1
Il6
Serpina3f
Slpi
Cxcl2
Slc15a3
Prdm1
Enpp2
Gda
Mmp10
a
Camp
Slc16a2
Tgm1
Cxcl3
Sorbs2
Ism1
Spink5
D430019H16Rik
Nt5e
Penk
Serping1
Lgi2
Igfbp3
Il21
Ifitm1
A4galt
St6galnac5
Col24a1
Gdpd2
Slc10a6
Sod3
Csmd1
Tnn
Cyp7b1
C1qtnf7
Cadm2
Hsd11b1
2610109H07Rik
Rtn4rl2
Gpr84
Olr1
Tnfsf11
Serpine2
Cd74
Kcnk10
Stc1
Il1a
C4b
Col23a1
Serpina3g
Siglec1
S100a8
Ndufa4l2
Mmp12
Agt
Serpina3m
Ptger2
Serpina3c
Slc36a2
Ptgfr
Kcnh1
Lrg1
Saa1
Lbp
Scara5
Fam69c
Igfbp5
C1s
AI607873
3110047P20Rik
Tnfsf8
Kbtbd11
Adamts9
4933404M02Rik
Mt2
Adra2a
Cxcr7
4833403I15Rik
Pcsk5
Anxa8
Trpc3
Ccl8
Lama4
Abcb1a
Tnfrsf9
Nppc
Ccl20
Tspan11
Rgs7bp
Crispld1
Mctp2
Prr16
Il11
Opcml
Ranbp3l
Gm5077
Cck
Il33
Gngt2
Lif
Adamts7
Cfh
Gpm6b
Ces1a
Akr1c18
Slc22a23
Slco4a1
Tns4
Avpr1a
Syt7
Ptpn5
Sox5
Hr
Fam19a2
Cyp26b1
Slit3
Prg4
Fabp4
Prelp
Ptges
Lmcd1
Fgf10
Icam1
Arg2
Mcoln2
Epas1
Dll1
Bdkrb1
1700112E06Rik
Pi15
Il1rn
Ch25h
Klhl38
Rbp4
Aldh1l1
C1ra
Sned1
Cpne7
Gria4
Rspo3
Slc6a12
Angpt1
Bhlhe22
Rgs2
Kcnj15
Plek
Map3k5
Etv1
Ccbe1
Slc39a4
Map3k8
Atp1b2
Atp8b1
Cfb
Bdkrb2
Cxcl16
Cpm
Gch1
Ccl2
Cnr1
Rasgrp3
Clu
Rasl11a
Casp4
Rasl12
Enox1
Col27a1
Nkd2
Irak3
Sh2d4a
Hpse
Abi3bp
Bmf
Kcne4
Abi3
Ereg
Ednra
Clca5
Auts2
Mitf

## Sheet: myCAF gene signature
Gene_ID
Prex2
Arhgap36
Sprr2k
Esm1
Cdh3
Acta2
Gjb2
1700009N14Rik
Klhdc8a
Col2a1
Ptprq
Tmem171
Fam150a
Tagln
Nkx2-3
Sprr1a
Tll1
Actg2
Tnnt2
Msln
Bmp4
Ccnd1
Gjb3
Lingo2
Fhdc1
Myocd
Spna1
Dkk2
Prss23
Ctgf
1700024P16Rik
Myl9
Krt19
Hck
Adra1d
Sync
Hey2
Dscam
Npnt
Dlk1
Scx
Tubb2b
Adrb1
Tubb2a-ps2
Cobl
Fhl1
Fgd3
Fam65b
Irs1
Ncrna00086
F2rl1
Lmod1
Pbp2
Lrrc7
Sdpr
Ahnak
9930111J21Rik1
Itih2
Lfng
Slc1a6
Cnn1
Gm12603
Myo5b
Rprm
Ngef
Met
Plau
Lama2
Akap12
Spock3
Masp1
Sdcbp2
Nuak2
Igsf11
Dpysl3
Sox8
Coch
Adcy1
Itga3
4931408A02Rik
Kcnab1
Pkp2
Mtap1b
Pkia
Lor
Cav1
Prune2
Ankrd1
Mycl1
Entpd1
Shank2
Adra1b
D4Bwg0951e
Lancl3
Anxa3
Mirg
Fam198b
Styk1
Cnn2
Rin3
Actg1
Rian
Prr7
Adamts5
Meg3
Tgfb1i1
Cdh18
Vim
Cd34
P2rx5
Ngf
Rab3b
Rspo2
Col11a1
Ccdc80
Ctnnd2
Gadd45g
Bok
Syk
Dusp9
Lypd6
Mamld1
Scrn1
Lrp2
C1ql3
2210411K11Rik
C77370
Rras2
Mcf2l
Dusp5
Olfm2
Fhl2
Anxa2
Arhgap22
Fam46b
Klra18
Dtna
Cgref1
Rgnef
Ogn
Fbln5
Mecom
Adam12
Mertk
Sox13
C430049B03Rik
Ntn4
Ctla2a
Bdnf
Tmsb4x
Lin28b
Cd24a
Sh3bp5
Fez1
Lrrk1
C530008M17Rik
Npr3
Sema3a
Tdrkh
Siglecg
Nrp1
Prr5l
Fzd6
Capn2
Ikzf2
Foxs1
Cacna1i
Epb4.1l4a
Plin4
Slc38a4
Flnc
Myh9
Epha1
Tmcc3
Nes
Trim16
Ptprd
Anxa1
Ak5
Mum1l1
Tpm1
Pdlim1
Lrrtm2
Cpa6
Mtmr10
Pcolce2
Htra1
Postn
Mogat2
Bcar3
Bmp3
Fam176a
Timp3
Il17d
Aif1l
Vcl
Flna
Gm1673
ORF63
Lipg
