# Supplementary material for: Squamous trans-differentiation of pancreatic cancer cells promotes stromal inflammation
Source: eLife. 2020 Apr 24;9:e53381. doi: 10.7554/eLife.53381 (PMC7200154; doi:10.7554/eLife.53381)
Supplement: Supplementary file 3. — Tab-1 (Human cancer cells sig UP): List of 633 human genes significantly upregulated in the human cancer cell compartment of SUIT2-p63 xenografts versus SUIT2-empty xenografts. Tab-2 (Mouse stromal cells sig UP): List of 500 mouse genes significantly upregulated in the mouse stromal cell compartment of SUIT2-p63 xenografts versus SUIT2-empty xenografts. Tab-3 (Human ranked TP63 vs empty): Human genes ranked by their mean log2 fold change in the human cancer cell compartment of SUIT2-p63 xenografts versus SUIT2-empty xenografts. Tab-4 (Mouse ranked TP63 vs empty): Mouse genes ranked by their mean log2 fold change in the stromal cell compartment of SUIT2-p63 xenografts versus SUIT2-empty xenografts. [file elife-53381-supp3.xlsx]

## Sheet: Human cancer cells sig UP
GeneID	baseMean	log2FoldChange	lfcSE	stat	pvalue	padj
KRT6A	6723.46	9.19448	0.16251	42.0068	0	0
SPRR3	4035.63	9.11216	0.194306	21.9015	2.51526e-106	1.03452e-103
KRT14	3866.8	8.72472	0.205559	22.315	2.6428e-110	1.21873e-107
KRT17	13890.4	8.35184	0.13144	60.6073	0	0
SPRR1B	2304.53	7.8331	0.188924	30.3256	5.2644e-202	8.01137e-199
SPRR1A	1817.27	7.76338	0.208445	21.8468	8.33863e-106	3.3394e-103
C10orf99	880.938	7.38225	0.220275	12.8145	1.36028e-37	1.12504e-35
FST	971.087	7.3349	0.20729	18.1536	1.20275e-73	2.47343e-71
TP63	488.642	6.5806	0.213522	15.6103	6.19864e-55	8.98389e-53
DSG3	588.663	6.21002	0.193325	24.2649	4.60095e-130	3.50086e-127
CRCT1	514.425	6.19937	0.212891	19.8037	2.7665e-87	7.79641e-85
S100A2	21852.5	6.19316	0.107537	57.391	0	0
PKP1	339.915	6.04918	0.215957	16.0654	4.45705e-58	6.99251e-56
A2ML1	472.675	6.00802	0.195114	22.943	1.73068e-116	9.08187e-114
MIR205HG	255.438	5.95728	0.234341	11.072	1.71589e-28	1.03211e-26
SPRR4	196.776	5.66707	0.237498	10.7055	9.59316e-27	5.36723e-25
KRT5	27869.9	5.61769	0.22552	25.2266	2.04661e-140	1.73029e-137
RNASE7	501.76	5.46233	0.172331	27.5628	3.10905e-167	3.6395e-164
TRIM29	955.943	5.43183	0.156859	32.6063	3.34321e-233	7.26814e-230
FAT2	245.758	5.31329	0.225438	16.3395	5.16958e-60	8.74119e-58
ZNF750	157.539	5.20973	0.235182	11.2552	2.18421e-29	1.37922e-27
SERPINB2	168.947	5.12903	0.244216	10.2791	8.75086e-25	4.48386e-23
FEZ1	498.501	5.07951	0.172938	26.8057	2.77008e-158	2.81034e-155
AKR1C2	765.174	5.00118	0.148497	32.0437	2.68306e-225	5.10384e-222
HES2	157.055	4.82318	0.221969	15.6887	1.80758e-55	2.69683e-53
KRT16	1098.06	4.81585	0.125203	37.4373	9.68102e-307	2.94652e-303
IL1B	200.984	4.7348	0.209089	18.5044	1.9016e-76	4.31918e-74
INPP5D	311.734	4.71438	0.179177	23.6055	3.38345e-123	2.23867e-120
GGT6	93.4651	4.66989	0.247152	8.60975	7.32204e-18	2.38601e-16
MTSS1	231.01	4.6579	0.198705	20.1648	1.99667e-90	6.20107e-88
GIMAP8	87.8846	4.63002	0.253827	9.50704	1.96155e-21	8.24612e-20
SERPINE1	414.537	4.60744	0.186932	23.0579	1.2262e-117	6.91123e-115
RHCG	317.88	4.55907	0.203483	20.4855	2.89853e-93	9.18956e-91
PLA2G4E	149.785	4.48365	0.231126	15.2714	1.18553e-52	1.51609e-50
S100A9	117.152	4.46763	0.247946	11.9736	4.88701e-33	3.47526e-31
GPR153	1968.24	4.43816	0.113633	38.7054	0	0
BDKRB2	109.141	4.41299	0.238456	13.0471	6.5985e-39	5.77104e-37
KRT6B	114.133	4.38686	0.224937	14.672	9.74397e-49	1.11491e-46
SLC37A2	419.406	4.37616	0.172855	24.0715	4.97118e-128	3.60245e-125
ECM1	513.041	4.30273	0.139232	29.7396	2.36594e-194	3.27317e-191
IL36RN	79.364	4.28501	0.254341	8.9664	3.06375e-19	1.09704e-17
LCE3D	92.464	4.27508	0.240478	12.3246	6.67844e-35	5.05634e-33
CFH	176.834	4.25322	0.21764	17.1014	1.44847e-65	2.68815e-63
CASP1	168.942	4.2476	0.193714	19.1398	1.17707e-81	3.08839e-79
CSTA	269.413	4.24596	0.173058	22.7386	1.85896e-114	9.42989e-112
SLIT1	76.6525	4.18327	0.250843	10.2335	1.40342e-24	7.09541e-23
ANXA8L1	1372.25	4.17532	0.248787	16.914	3.54994e-64	6.28175e-62
MMP10	1992.16	4.15445	0.156212	26.4284	6.46996e-154	6.15374e-151
RAET1G	211.657	4.12065	0.183076	20.6042	2.51794e-94	8.51511e-92
EPHB3	165.695	4.01756	0.198079	18.2527	1.9692e-74	4.16212e-72
IL1RN	267.371	3.90255	0.174113	21.3049	1.02304e-100	3.6206e-98
IRF6	4391.91	3.89439	0.114232	34.0198	1.13459e-253	2.8777e-250
LCE3E	60.5498	3.87386	0.252748	10.1114	4.91638e-24	2.398e-22
TMEM40	140.711	3.76585	0.193122	17.7249	2.69343e-70	5.46515e-68
RDH12	75.4734	3.72693	0.232025	13.066	5.14931e-39	4.52961e-37
MACROD2	1214.99	3.70111	0.12094	30.3874	8.06921e-203	1.36441e-199
KRT13	4945.27	3.59405	0.283246	16.1944	5.52192e-59	8.93963e-57
GJA1	109.317	3.57218	0.236586	13.5918	4.48162e-42	4.34403e-40
NFASC	46.2529	3.54481	0.257552	9.41896	4.5558e-21	1.86371e-19
ADGRF4	180.86	3.50632	0.178651	18.6472	1.33054e-77	3.1151e-75
SEMA3F	134.013	3.49752	0.189052	17.1935	2.97047e-66	5.58082e-64
PXDN	46.788	3.49414	0.257203	9.68383	3.53227e-22	1.55809e-20
DQX1	54.2985	3.4876	0.24691	11.0539	2.10003e-28	1.24837e-26
NECTIN1	5926.18	3.46345	0.148004	23.3818	6.54935e-121	4.15283e-118
COL4A5	82.5414	3.44767	0.248997	12.1049	9.94837e-34	7.17509e-32
PRDM1	188.8	3.42084	0.179246	18.2678	1.49431e-74	3.20287e-72
CDH3	2743.25	3.40494	0.115229	29.4865	4.28376e-191	5.43252e-188
FAM212A	82.0318	3.39722	0.228013	13.2369	5.37211e-40	4.80898e-38
DENND2C	170.574	3.39416	0.217119	14.9522	1.50706e-50	1.77786e-48
MFAP5	42.4223	3.39252	0.267626	8.29303	1.104e-16	3.30721e-15
PPP2R2B	98.9609	3.37099	0.204569	15.058	3.05793e-51	3.72285e-49
AKR1C1	362.155	3.3679	0.139153	23.7259	1.94862e-124	1.34791e-121
OLFM4	140.51	3.35004	0.210501	15.0611	2.91921e-51	3.58262e-49
SEMA4A	144.819	3.34509	0.186447	16.9811	1.13361e-64	2.05372e-62
PGBD5	908.677	3.3293	0.144091	22.9599	1.17276e-116	6.37392e-114
NECTIN4	414.017	3.31585	0.167305	19.519	7.57057e-85	2.0573e-82
SPRR2A	43.4605	3.26499	0.268852	8.6454	5.36185e-18	1.76616e-16
SPRR2D	33.147	3.26445	0.272032	6.92954	4.22211e-12	8.35528e-11
ANKRD65	28.1999	3.26328	0.275309	7.79452	6.46531e-15	1.65638e-13
GRHL3	407.321	3.25213	0.138616	23.1105	3.63053e-118	2.12498e-115
SLC2A9	80.9608	3.22945	0.229919	12.7684	2.46129e-37	2.02464e-35
ANXA8	987.653	3.22174	0.122009	26.2701	4.21281e-152	3.77121e-149
PI3	293.602	3.2125	0.199965	15.7708	4.94107e-56	7.51932e-54
IL36G	55.102	3.2066	0.260367	10.3377	4.75833e-25	2.47987e-23
RHOV	392.698	3.16011	0.139999	22.2581	9.41581e-110	4.21441e-107
C15orf48	2408.19	3.1534	0.140464	22.4097	3.164e-111	1.50468e-108
CLEC4E	88.3298	3.14501	0.227442	12.8228	1.22159e-37	1.01643e-35
C14orf132	29.2723	3.08559	0.272585	7.13607	9.6038e-13	2.02706e-11
MUC17	40.8545	3.08199	0.254356	9.87629	5.27483e-23	2.38197e-21
PHLDA3	1024.87	3.07898	0.123377	24.852	2.46044e-136	1.97068e-133
PLEKHH2	276.137	3.07846	0.200137	15.1388	8.98919e-52	1.11218e-49
SLPI	10111.6	3.06092	0.11233	27.2394	2.21953e-163	2.41263e-160
FBLN1	37.0874	3.04477	0.265784	8.93861	3.94104e-19	1.39153e-17
S100A8	27.4567	3.04212	0.280098	7.64443	2.09866e-14	5.13463e-13
IL1A	620.503	2.98325	0.138627	21.3794	2.07997e-101	7.53642e-99
AKR1B10	1793.46	2.97841	0.246457	12.1767	4.13435e-34	3.0542e-32
MUC16	1768.2	2.97738	0.159218	18.6686	8.91092e-78	2.11885e-75
ASPRV1	40.1356	2.96047	0.26494	9.27277	1.81379e-20	7.02348e-19
RLBP1	33.7281	2.9558	0.26993	8.45943	2.68688e-17	8.37889e-16
COL4A6	24.9208	2.94943	0.281052	7.50451	6.16606e-14	1.4239e-12
STARD5	113.576	2.93774	0.192789	14.5821	3.65187e-48	4.11661e-46
CA2	207.724	2.92909	0.163563	17.5225	9.65581e-69	1.88387e-66
SHC4	25.1744	2.88634	0.27316	7.27389	3.49291e-13	7.65923e-12
BATF2	163.088	2.86667	0.182269	15.3249	5.21582e-53	7.02428e-51
LOC100505650	143.63	2.83177	0.183369	15.0048	6.82693e-51	8.11658e-49
ZNF385A	335.074	2.81737	0.140353	19.8507	1.08755e-87	3.12271e-85
GRHL1	411.214	2.8054	0.128079	21.7067	1.77377e-104	6.74829e-102
BARX2	597.565	2.78195	0.163664	16.9097	3.81642e-64	6.67567e-62
TMCC3	956.852	2.77871	0.119209	23.2329	2.11984e-119	1.29039e-116
C1orf186	124.121	2.76368	0.211367	12.7161	4.81219e-37	3.91615e-35
C1orf74	287.842	2.75603	0.13785	19.7426	9.29587e-87	2.57208e-84
HOTS	29.5197	2.72612	0.268228	8.33152	7.98115e-17	2.40987e-15
DNAJB13	71.8862	2.7147	0.229263	11.2284	2.95782e-29	1.86e-27
TMEM27	66.6929	2.70133	0.223751	11.3808	5.21208e-30	3.37521e-28
CHST2	39.5205	2.68721	0.253232	9.47468	2.67581e-21	1.10653e-19
RAB7B	35.9185	2.6799	0.257851	9.14105	6.18491e-20	2.33553e-18
PTHLH	276.411	2.67486	0.165159	16.0168	9.7589e-58	1.51542e-55
RGS16	27.4425	2.67474	0.274877	7.80036	6.17297e-15	1.58415e-13
TACR2	24.5039	2.66687	0.275004	7.50562	6.11375e-14	1.41828e-12
IL20RB	244.759	2.65836	0.160721	16.3296	6.07506e-60	1.01594e-57
ADAMTSL4	144.302	2.64892	0.172262	15.0221	5.25787e-51	6.30033e-49
LOC105373985	30.2042	2.64611	0.28094	7.4516	9.22174e-14	2.10715e-12
OVOL1	575.71	2.64452	0.115941	22.6937	5.17331e-114	2.53959e-111
HOPX	18.8211	2.64383	0.282578	6.43057	1.27128e-10	2.1496e-09
SLC40A1	195.575	2.59375	0.200874	12.7335	3.85271e-37	3.15218e-35
BDKRB1	16.6519	2.59075	0.284153	6.93012	4.20473e-12	8.33172e-11
WNT9A	76.4541	2.58593	0.240214	10.3509	4.14658e-25	2.19106e-23
SLC44A5	42.4396	2.56826	0.252226	9.35299	8.52012e-21	3.37654e-19
SH3TC1	275.184	2.56742	0.138631	18.327	5.04265e-75	1.11216e-72
FUT3	173.025	2.56041	0.170054	14.8065	1.33047e-49	1.54558e-47
HCAR2	44.9799	2.55214	0.248245	9.52205	1.69798e-21	7.17772e-20
TRAF3IP3	72.3934	2.54402	0.22623	10.8018	3.37471e-27	1.90209e-25
MMP28	61.216	2.54344	0.229678	10.5075	7.97585e-26	4.31945e-24
HCAR3	28.541	2.53288	0.266272	8.2504	1.5787e-16	4.69231e-15
CA12	2774	2.52604	0.114627	22.0201	1.84761e-107	7.81028e-105
KLK6	180.478	2.49697	0.160645	15.3141	6.15647e-53	8.14689e-51
MAOA	191.639	2.4907	0.160498	15.3036	7.22879e-53	9.48342e-51
KCTD12	27.3421	2.48905	0.265567	8.15126	3.60137e-16	1.03407e-14
SLC1A3	49.1244	2.46115	0.229739	10.068	7.65093e-24	3.63849e-22
SNCG	46.7729	2.45709	0.236792	9.72747	2.3024e-22	1.0245e-20
ACE2	93.8538	2.4436	0.217427	10.9535	6.39638e-28	3.68713e-26
KRT23	62.0264	2.3961	0.225993	10.1714	2.65964e-24	1.31411e-22
HTR7	22.4258	2.39014	0.274862	7.37083	1.69573e-13	3.82873e-12
DSE	379.162	2.38976	0.145636	16.3148	7.74847e-60	1.26792e-57
RAET1E	52.8696	2.38064	0.225584	10.033	1.09192e-23	5.12866e-22
UCP2	104.127	2.36964	0.198689	11.6659	1.90435e-31	1.28232e-29
STXBP6	44.2681	2.36501	0.237387	9.37692	6.79255e-21	2.72024e-19
GPR87	588.227	2.34602	0.127734	18.305	7.54535e-75	1.64036e-72
JAG2	383.985	2.33937	0.124158	18.7369	2.47822e-78	6.18254e-76
IL13RA2	23.4846	2.33237	0.274502	7.39741	1.3887e-13	3.15892e-12
IL33	17.2803	2.32385	0.284342	5.99036	2.09379e-09	3.02883e-08
SOX7	330.49	2.30626	0.137917	16.6195	5.03665e-62	8.6121e-60
DFNA5	365.606	2.30259	0.114474	19.9975	5.78505e-89	1.76074e-86
RSAD2	289.964	2.30029	0.147117	15.5257	2.32316e-54	3.30409e-52
SRGAP3	27.4006	2.28412	0.266969	7.76251	8.32669e-15	2.1261e-13
DHRS13	576.742	2.26869	0.123958	18.2449	2.27245e-74	4.73728e-72
TTC9	215.584	2.26465	0.143573	15.6226	5.10922e-55	7.47617e-53
LOC107987276	26.5496	2.26084	0.26929	7.62063	2.52448e-14	6.08837e-13
TGM1	98.3307	2.25305	0.234975	9.42938	4.12535e-21	1.69217e-19
AQP3	1740.28	2.24681	0.22253	10.1091	5.03258e-24	2.44683e-22
GUCA2B	14.3499	2.23076	0.285434	5.52618	3.27284e-08	4.01986e-07
IRF5	146.82	2.22823	0.165892	13.2548	4.23485e-40	3.81337e-38
KLHDC7B	38.1078	2.20952	0.251021	8.32693	8.29634e-17	2.50007e-15
SPRR2E	12.795	2.20585	0.28653	6.43558	1.23002e-10	2.08678e-09
TMEM154	424.611	2.20274	0.131629	16.6679	2.24481e-62	3.88198e-60
IHH	30.5538	2.19739	0.260904	7.84834	4.21593e-15	1.10617e-13
KLK7	141.372	2.1922	0.28658	8.50944	1.74777e-17	5.54115e-16
ABCA12	641.413	2.19053	0.139909	15.6231	5.07179e-55	7.47617e-53
VSNL1	186.081	2.19018	0.160723	13.5003	1.55754e-41	1.48142e-39
PSTPIP2	204.269	2.18762	0.15699	13.812	2.15825e-43	2.21921e-41
CEBPA	27.1058	2.18452	0.266028	7.57143	3.69136e-14	8.76366e-13
GRM5	13.6961	2.1784	0.286395	5.85447	4.78522e-09	6.69931e-08
LOC100653061	26.3868	2.16357	0.271755	7.34537	2.05188e-13	4.59199e-12
ARTN	36.6101	2.1553	0.255366	7.99667	1.27827e-15	3.54976e-14
ARL4D	965.725	2.15495	0.10797	19.9266	2.39401e-88	7.00617e-86
GPC1	1510.3	2.15275	0.101516	21.1857	1.29293e-99	4.47178e-97
FXYD3	3222.34	2.14859	0.126579	16.9676	1.42691e-64	2.55467e-62
OAS2	1914.62	2.14768	0.114706	18.7087	4.20269e-78	1.03156e-75
DUSP7	347.592	2.14688	0.13839	15.4431	8.39672e-54	1.17231e-51
LAPTM5	55.6208	2.14419	0.229129	9.0589	1.31779e-19	4.83231e-18
TYMP	1096.24	2.13738	0.0987887	21.606	1.57589e-103	5.84923e-101
PALMD	13.8655	2.13263	0.285367	5.61622	1.95182e-08	2.46292e-07
ALOX15B	15.0714	2.13171	0.285864	5.6858	1.30203e-08	1.6806e-07
KPRP	13.4488	2.12671	0.286486	5.8058	6.40606e-09	8.77474e-08
PADI1	146.663	2.12666	0.19909	10.5713	4.04938e-26	2.20873e-24
TNNT3	11.8	2.12338	0.286579	6.30569	2.86909e-10	4.69482e-09
GCNT3	2454.88	2.11972	0.229432	9.25639	2.11458e-20	8.12619e-19
UGT1A10	253.749	2.1171	0.161866	13.0001	1.22125e-38	1.05596e-36
CLDN23	349.953	2.10712	0.112824	18.587	4.09184e-77	9.43479e-75
FAM3D	45.6277	2.0968	0.224227	8.97913	2.72917e-19	9.86521e-18
RPTN	15.0572	2.09334	0.286309	6.48376	8.94659e-11	1.53667e-09
CLDN4	8986.7	2.09021	0.101624	20.5651	5.63409e-94	1.8639e-91
PTGS2	24.0291	2.08842	0.279135	6.89813	5.26908e-12	1.03732e-10
CXCL14	12.9371	2.08502	0.286449	6.35024	2.14975e-10	3.5676e-09
CMPK2	293.788	2.08441	0.148107	14.0012	1.5328e-44	1.59768e-42
MICALL1	743.849	2.08355	0.155104	13.4116	5.17149e-41	4.79877e-39
UPK2	343.421	2.08114	0.144259	14.3637	8.74685e-47	9.57623e-45
DHRS9	842.535	2.08095	0.152079	13.6648	1.6484e-42	1.62892e-40
APCDD1L	10.6935	2.07822	0.286568	6.18929	6.0434e-10	9.46178e-09
CALD1	46.6599	2.06947	0.229444	8.68619	3.74799e-18	1.25081e-16
SH3BP1	519.539	2.05815	0.111791	18.359	2.79908e-75	6.26418e-73
B3GNT7	33.1319	2.05123	0.255657	7.63289	2.29555e-14	5.57156e-13
MUC2	15.873	2.04694	0.282618	6.21983	4.97693e-10	7.93908e-09
UGT1A6	13.0037	2.0454	0.285857	5.48327	4.17543e-08	5.05101e-07
CRNN	11.3855	2.03657	0.286403	6.20717	5.39458e-10	8.56045e-09
STOM	864.289	2.03256	0.119012	17.0547	3.22541e-65	5.91377e-63
LEFTY1	22.2418	2.02959	0.28071	6.66633	2.62277e-11	4.76862e-10
ASPG	16.7556	2.02754	0.283067	6.25222	4.04666e-10	6.53045e-09
SETBP1	34.2007	2.01756	0.25836	7.47499	7.72072e-14	1.77752e-12
LAMP3	164.799	2.01269	0.182177	10.9511	6.56212e-28	3.76839e-26
GLUL	2393.87	2.01057	0.0924128	21.7453	7.65456e-105	2.98685e-102
KLK8	40.5359	2.00767	0.245736	7.88386	3.17425e-15	8.401e-14
STEAP4	37.8569	1.98575	0.248362	7.67893	1.60428e-14	3.96973e-13
ABCG1	61.5703	1.98515	0.225443	8.60915	7.36016e-18	2.39331e-16
CRABP2	378.706	1.98413	0.156282	12.6535	1.07008e-36	8.43753e-35
NUAK2	118.875	1.98046	0.164559	11.8865	1.39069e-32	9.79794e-31
MX1	2188.82	1.97287	0.128522	15.3422	3.99128e-53	5.42316e-51
ARHGAP23	203.838	1.95936	0.268174	7.34956	1.9886e-13	4.45692e-12
FGFR3	828.683	1.95905	0.098047	19.9509	1.47323e-88	4.396e-86
HR	350.722	1.95824	0.128594	15.1733	5.31245e-52	6.73707e-50
MUC20	29.2086	1.94771	0.272104	6.85394	7.18455e-12	1.39457e-10
ITM2B	6131.35	1.94212	0.102435	18.9562	3.92655e-80	1.01278e-77
GJB6	90.7192	1.93867	0.20005	9.55003	1.29655e-21	5.51142e-20
PLAT	5269.99	1.93468	0.1435	13.4798	2.05594e-41	1.94331e-39
SFN	6001.44	1.93271	0.103316	18.7034	4.64063e-78	1.12097e-75
LY6D	1884.98	1.93249	0.110446	17.4879	1.77311e-68	3.41559e-66
THEMIS2	21.1468	1.92694	0.274458	6.5431	6.02555e-11	1.05763e-09
IL36B	9.99465	1.90256	0.286495	5.386	7.20436e-08	8.38195e-07
FGD2	38.9274	1.88913	0.232959	7.82981	4.886e-15	1.27103e-13
SH3PXD2A	594.306	1.88866	0.129468	14.5627	4.85059e-48	5.38805e-46
MICALCL	63.2313	1.88694	0.226712	8.16766	3.14441e-16	9.06281e-15
DAPL1	12.2084	1.88662	0.285608	5.55118	2.83741e-08	3.51626e-07
SLC10A2	84.4826	1.88269	0.217382	8.54762	1.25651e-17	4.00873e-16
AKR1C3	2773.68	1.84988	0.129232	14.3102	1.89033e-46	2.05479e-44
HS6ST1	281.872	1.84345	0.138332	13.2767	3.16032e-40	2.87987e-38
DMBT1	21.3994	1.84236	0.279073	6.22248	4.8935e-10	7.8224e-09
NSG1	52.0349	1.84022	0.209574	8.56787	1.05418e-17	3.37737e-16
NOTCH3	133.492	1.83754	0.179877	10.1278	4.16103e-24	2.04266e-22
CTSH	1555.86	1.83195	0.0969933	18.8756	1.81172e-79	4.59512e-77
C22orf23	88.4796	1.82544	0.200941	8.97344	2.87397e-19	1.03395e-17
SRRM3	18.6891	1.82285	0.279418	6.07883	1.21065e-09	1.80095e-08
LRP4	24.8589	1.82056	0.263714	6.58888	4.43153e-11	7.87839e-10
PROM2	261.149	1.81921	0.160531	11.2906	1.46078e-29	9.30129e-28
FGFBP1	4387.99	1.81302	0.093751	19.3345	2.75509e-83	7.3556e-81
MMP14	3320.23	1.81221	0.138193	13.1104	2.87224e-39	2.54126e-37
KREMEN1	224.461	1.80944	0.133927	13.4444	3.31982e-41	3.09945e-39
LSP1	11.7329	1.80048	0.285941	5.02697	4.98279e-07	5.05858e-06
TMEM86A	164.18	1.79977	0.146716	12.1828	3.83956e-34	2.85026e-32
HAS3	2316.09	1.79942	0.0876226	20.5276	1.22062e-93	3.95221e-91
IL16	13.3764	1.79912	0.285108	5.62419	1.86381e-08	2.35773e-07
LUZP2	9.32686	1.79018	0.285782	5.23657	1.6359e-07	1.80662e-06
METRNL	51.6763	1.78939	0.216274	8.09087	5.92418e-16	1.67885e-14
NEB	2770.03	1.78391	0.143029	12.4696	1.09379e-35	8.53608e-34
PLA2G4F	17.369	1.78291	0.278685	5.96736	2.41122e-09	3.46823e-08
ADGRF2	14.4857	1.77849	0.282091	5.75164	8.83828e-09	1.17777e-07
TMPRSS4	2863.82	1.77775	0.0805815	22.0549	8.57008e-108	3.72627e-105
MMP1	101635	1.77397	0.130422	13.6019	3.90207e-42	3.80652e-40
EFNA1	1143.79	1.77396	0.119334	14.8537	6.5871e-50	7.71096e-48
ROS1	12.1702	1.75625	0.285672	5.43446	5.49612e-08	6.5191e-07
RAP2B	1724.57	1.75484	0.123164	14.2408	5.11145e-46	5.47789e-44
C12orf54	8.07734	1.75016	0.284551	5.68306	1.32309e-08	1.70489e-07
KLK10	4905.54	1.74636	0.114113	15.3013	7.49002e-53	9.74215e-51
SAMD9	2877.78	1.74049	0.135702	12.8228	1.22228e-37	1.01643e-35
NCALD	17.6445	1.73278	0.276671	5.86891	4.38656e-09	6.14684e-08
NXN	982.801	1.72894	0.109683	15.7488	6.99429e-56	1.05385e-53
RAB11FIP1	1380.05	1.72688	0.123539	13.9707	2.35293e-44	2.43585e-42
COL12A1	33.5505	1.72544	0.24844	6.7476	1.50312e-11	2.79981e-10
BTG2	118.976	1.72503	0.160317	10.667	1.45263e-26	8.0679e-25
PIM1	1082.43	1.72306	0.135593	12.697	6.14394e-37	4.92097e-35
SULT2B1	672.203	1.71992	0.141455	12.1438	6.18852e-34	4.52773e-32
LGALS7B	28.6306	1.71808	0.256352	6.48742	8.7317e-11	1.50146e-09
PPBP	44.0425	1.7172	0.260227	6.495	8.30317e-11	1.43425e-09
CCR6	23.7212	1.7159	0.266326	6.18651	6.15094e-10	9.62025e-09
THBS1	509.391	1.71555	0.127269	13.4571	2.79614e-41	2.62665e-39
MARK1	15.402	1.71115	0.284422	5.59685	2.18275e-08	2.74069e-07
HSPB1	6893.8	1.71088	0.124289	13.7639	4.20039e-43	4.26143e-41
MYO1B	1513.09	1.70441	0.0968833	17.5827	3.3432e-69	6.69431e-67
GM2A	621.129	1.70401	0.123816	13.7424	5.66076e-43	5.705e-41
SNN	302.344	1.69566	0.131746	12.8326	1.07755e-37	9.05974e-36
A4GALT	684.077	1.69344	0.109689	15.4192	1.21631e-53	1.66755e-51
MREG	883.755	1.69146	0.114467	14.7628	2.54513e-49	2.93423e-47
GJB5	901.318	1.68208	0.0964368	17.4261	5.23374e-68	9.95588e-66
IRAK3	24.8472	1.63906	0.257852	6.13386	8.57697e-10	1.31742e-08
CD200	11.4159	1.63644	0.286205	5.06417	4.10193e-07	4.22922e-06
PLEKHG5	670.384	1.62859	0.142994	11.377	5.44687e-30	3.51231e-28
GPX2	9447.68	1.62723	0.114257	14.241	5.10068e-46	5.47789e-44
LGALS7	22.2846	1.62114	0.267687	5.81832	5.94414e-09	8.17883e-08
PPL	2262.19	1.6194	0.12206	13.2633	3.77948e-40	3.42358e-38
SLC2A12	79.0898	1.61247	0.201857	7.90684	2.64009e-15	7.11096e-14
COL27A1	132.584	1.60656	0.203691	7.84726	4.25227e-15	1.11379e-13
CLDN1	7168.39	1.60346	0.0982223	16.3233	6.74284e-60	1.11535e-57
S100A14	429.534	1.60263	0.175233	9.13197	6.72646e-20	2.52126e-18
RAB38	765.048	1.59958	0.0908962	17.5799	3.51499e-69	6.9469e-67
LRP1	2132.61	1.5977	0.131682	12.1297	7.35183e-34	5.32763e-32
SPATA18	16.8396	1.59688	0.277604	5.46703	4.57637e-08	5.49237e-07
FOXC1	279.026	1.58606	0.118982	13.2918	2.58209e-40	2.36712e-38
FAM53B	215.14	1.58269	0.14433	10.9292	8.35404e-28	4.77939e-26
CACNB4	34.2738	1.58201	0.23311	6.61905	3.61519e-11	6.4791e-10
FAM25A	122.426	1.58051	0.167322	9.38425	6.33663e-21	2.54435e-19
KPNA7	73.6652	1.57654	0.184173	8.4624	2.61925e-17	8.18475e-16
TLL1	15.4861	1.57255	0.284688	5.26691	1.38737e-07	1.55243e-06
JUP	10009.4	1.57124	0.120562	13.0319	8.05731e-39	7.00664e-37
RCSD1	7.98485	1.57096	0.284712	4.50227	6.72308e-06	5.45373e-05
CTSV	230.196	1.55979	0.130263	11.9348	7.79346e-33	5.51632e-31
ZNF219	817.901	1.55695	0.0965157	16.1178	1.91353e-58	3.03335e-56
KRT78	8.70096	1.55531	0.285358	4.60227	4.17913e-06	3.56292e-05
COLCA2	25.5384	1.55093	0.264929	5.71623	1.0891e-08	1.42511e-07
LPAR3	7.61748	1.54663	0.284731	4.44152	8.93241e-06	7.06514e-05
S1PR5	46.3135	1.53918	0.219609	6.8911	5.53638e-12	1.08433e-10
KCTD15	100.604	1.53899	0.163516	9.33922	9.70443e-21	3.83556e-19
TACSTD2	9564.7	1.53531	0.101258	15.1614	6.3733e-52	8.01561e-50
LYPD3	1177.18	1.53516	0.111875	13.7144	8.3214e-43	8.33125e-41
ARHGEF37	114.566	1.53194	0.15823	9.61705	6.77451e-22	2.92882e-20
ALDH3B2	28.1388	1.53085	0.261153	5.7363	9.67677e-09	1.28053e-07
BCAS4	231.86	1.52774	0.145681	10.4581	1.34534e-25	7.2344e-24
IFI44L	1041.54	1.52672	0.130879	11.6586	2.07547e-31	1.39139e-29
COL7A1	1769.35	1.52623	0.240318	6.36053	2.01061e-10	3.34398e-09
P2RY1	19.1838	1.52454	0.279673	5.29731	1.17523e-07	1.32479e-06
SPINK1	43.4869	1.52045	0.218591	6.83317	8.30578e-12	1.59593e-10
VGLL1	79.387	1.51935	0.184244	8.17017	3.07958e-16	8.9097e-15
SOGA3	14.1921	1.51532	0.278635	5.14883	2.62115e-07	2.80906e-06
ALDH3A1	146.255	1.51497	0.148094	10.1783	2.47976e-24	1.23324e-22
CRP	9.37991	1.51044	0.286576	4.75217	2.01243e-06	1.82946e-05
TLE4	172.916	1.5098	0.14659	10.2553	1.12045e-24	5.7027e-23
PLXNA1	1122.92	1.50694	0.149485	10.0762	7.03832e-24	3.37884e-22
FUT6	34.9073	1.49705	0.236776	6.19265	5.91598e-10	9.29096e-09
KCNE3	426.955	1.49402	0.265414	5.65941	1.51896e-08	1.94249e-07
F2RL1	4813.64	1.49099	0.115525	12.9046	4.23866e-38	3.60357e-36
OR4C6	25.2285	1.48915	0.255166	5.68612	1.29955e-08	1.67882e-07
HEG1	14.903	1.48733	0.280361	5.05985	4.19593e-07	4.3232e-06
ATP10D	143.935	1.48659	0.159573	9.27126	1.83958e-20	7.10526e-19
TMEM45A	9.99628	1.48187	0.286254	4.74397	2.09573e-06	1.90064e-05
HLA-DQB1	22.607	1.47901	0.260539	5.50093	3.77796e-08	4.59577e-07
DSP	3039.26	1.47626	0.144729	10.1986	2.01164e-24	1.00701e-22
SLC6A8	513.139	1.47492	0.165536	8.89909	5.63082e-19	1.96988e-17
GSDMC	18.5322	1.47437	0.272569	5.22555	1.73643e-07	1.90498e-06
HAP1	70.8914	1.474	0.217755	6.71407	1.89275e-11	3.49562e-10
TGM3	8.6822	1.47298	0.27761	5.46033	4.75245e-08	5.67683e-07
RND1	115.089	1.47296	0.164406	8.90542	5.31852e-19	1.86491e-17
SYNPO	60.0887	1.47222	0.24711	5.91795	3.25978e-09	4.6362e-08
MXD1	809.406	1.47132	0.124535	11.8058	3.64336e-32	2.50881e-30
SYNPO2L	7.93911	1.46625	0.285779	4.48772	7.19895e-06	5.8057e-05
ANKUB1	6.24784	1.46608	0.279195	5.20152	1.9767e-07	2.15021e-06
TP53INP2	293.511	1.46399	0.117325	12.4489	1.41855e-35	1.1014e-33
NEFL	30.6649	1.46151	0.24458	5.8432	5.12063e-09	7.1426e-08
NPBWR1	7.01348	1.45125	0.280864	4.70359	2.55628e-06	2.28295e-05
SEMA5A	22.6085	1.44764	0.283185	5.08206	3.73359e-07	3.89163e-06
S100P	90.1342	1.4466	0.220735	6.51865	7.09424e-11	1.23242e-09
AREG	2437.07	1.44596	0.106435	13.5824	5.08982e-42	4.90234e-40
ST6GALNAC2	244.985	1.44588	0.131549	10.9645	5.66257e-28	3.28905e-26
ADGRF1	2644.38	1.44373	0.0892525	16.1725	7.88037e-59	1.26235e-56
KRTDAP	9.5372	1.44365	0.286581	4.64357	3.4244e-06	2.98266e-05
LRRC8A	2936.52	1.44145	0.128376	11.2265	3.02306e-29	1.89321e-27
CLCF1	1078.42	1.44054	0.111413	12.9236	3.31441e-38	2.83363e-36
EFNB1	1591.04	1.43779	0.0929717	15.4591	6.54755e-54	9.22599e-52
ZFP92	30.9504	1.42647	0.241001	5.80195	6.55465e-09	8.93805e-08
NDST1	457.893	1.42283	0.123093	11.5445	7.87031e-31	5.20741e-29
KLK12	6.5374	1.42076	0.280439	4.62073	3.824e-06	3.28963e-05
SBSN	8.22798	1.42008	0.278674	4.8042	1.55371e-06	1.44879e-05
FBXO39	17.7215	1.41751	0.275758	4.9863	6.15478e-07	6.1218e-06
TMEM253	56.501	1.41679	0.195184	7.17517	7.2216e-13	1.55663e-11
HERC6	1047.37	1.41677	0.0941053	15.0475	3.58476e-51	4.32959e-49
LIPK	8.19518	1.41661	0.285156	4.45451	8.40831e-06	6.69235e-05
SAMD9L	452.443	1.414	0.159822	8.83867	9.68644e-19	3.34259e-17
APOBEC3G	54.3872	1.41337	0.215527	6.4793	9.21474e-11	1.57916e-09
TM4SF20	23.7002	1.41269	0.273071	5.0583	4.23022e-07	4.35263e-06
PCDHGC3	227.056	1.411	0.208951	6.74035	1.58001e-11	2.93227e-10
SNX18	327.827	1.40702	0.124269	11.3022	1.279e-29	8.17806e-28
KRT15	710.286	1.40652	0.110665	12.7004	5.88212e-37	4.7362e-35
PDGFRA	7.42003	1.40497	0.278906	4.70761	2.50634e-06	2.24362e-05
GYLTL1B	42.8395	1.40496	0.238566	5.81346	6.11934e-09	8.39712e-08
PELI1	361.788	1.4011	0.145627	9.60922	7.30974e-22	3.13351e-20
INTS3	72.492	1.40097	0.219686	6.33237	2.41417e-10	3.98902e-09
KCNK15	26.5983	1.40017	0.256039	5.35328	8.63734e-08	9.95027e-07
SDC1	6129.68	1.40014	0.0987413	14.1787	1.24201e-45	1.32174e-43
GPR176	74.842	1.39665	0.2316	5.99336	2.05546e-09	2.97621e-08
LOC105369914	12.7053	1.3956	0.284446	4.688	2.75886e-06	2.44522e-05
PAOX	54.4803	1.39191	0.213229	6.45791	1.06157e-10	1.81109e-09
FRMD6	1122.6	1.3905	0.125947	11.0352	2.58401e-28	1.51244e-26
VTCN1	8.88933	1.38976	0.285983	4.48264	7.37237e-06	5.93926e-05
SLC5A1	503.179	1.38953	0.144428	9.61349	7.0132e-22	3.01488e-20
SNAI2	424.252	1.38896	0.130817	10.605	2.82565e-26	1.56366e-24
LAD1	5998.67	1.3818	0.0895077	15.4366	9.2852e-54	1.28456e-51
NIPAL4	79.5942	1.38149	0.181689	7.54711	4.45037e-14	1.05001e-12
KLK11	637.156	1.38012	0.106389	12.9618	2.01374e-38	1.73136e-36
LGALS9	642.989	1.37874	0.128749	10.6998	1.01994e-26	5.68552e-25
RNASET2	3061.97	1.37245	0.126127	10.8797	1.4404e-27	8.14868e-26
SDCBP2	580.716	1.37148	0.0968466	14.1482	1.91704e-45	2.01196e-43
AK8	47.833	1.36881	0.221829	6.10437	1.03205e-09	1.55502e-08
HCAR1	271.903	1.36624	0.178888	7.62533	2.43415e-14	5.87982e-13
TOM1L2	1076.95	1.36355	0.0962125	14.1661	1.48458e-45	1.56892e-43
MGARP	14.4865	1.36283	0.284557	4.6754	2.93384e-06	2.58524e-05
PHLDB2	385.031	1.36264	0.15044	9.04616	1.48079e-19	5.40401e-18
ABAT	31.5881	1.36186	0.236753	5.65309	1.57592e-08	2.01222e-07
MMP9	25.4185	1.36085	0.278258	4.83347	1.34171e-06	1.26429e-05
PTGES	807.39	1.36044	0.107246	12.6779	7.84455e-37	6.25018e-35
OAS3	3581.15	1.35927	0.126835	10.7154	8.61473e-27	4.8376e-25
MFSD2A	117.497	1.35828	0.162457	8.32332	8.55365e-17	2.57252e-15
CALML3	5.90015	1.35733	0.275678	5.03566	4.762e-07	4.85603e-06
MCC	232.555	1.35657	0.151011	8.96334	3.1499e-19	1.1226e-17
NUDT11	216.318	1.35622	0.135176	10.0078	1.40895e-23	6.537e-22
SOX6	7.92046	1.35565	0.285228	4.33292	1.47148e-05	0.000111076
KRT4	6.78477	1.35174	0.280724	4.15651	3.23144e-05	0.000224446
DLL4	35.7205	1.35123	0.233268	5.70316	1.17606e-08	1.52707e-07
LPAR1	340.564	1.34547	0.152482	8.81247	1.2242e-18	4.19591e-17
PTPN13	1018.8	1.34541	0.129959	10.3484	4.25643e-25	2.24133e-23
CYP4F11	454.118	1.34088	0.132037	10.144	3.52395e-24	1.73552e-22
KRT6C	6.67225	1.34033	0.274221	5.1083	3.25075e-07	3.41643e-06
DUOX1	35.6224	1.33956	0.245059	5.39764	6.75235e-08	7.87412e-07
ASS1	1453.18	1.33821	0.10398	12.8661	6.98853e-38	5.90842e-36
PLAUR	2009.55	1.33628	0.130636	10.2265	1.50903e-24	7.6041e-23
SERINC2	3120.56	1.33534	0.0979897	13.6253	2.83185e-42	2.78032e-40
COL4A1	8.04037	1.33254	0.28484	4.30612	1.66145e-05	0.000123336
HUNK	20.6864	1.33189	0.260941	4.97681	6.46408e-07	6.41267e-06
CISH	39.208	1.32208	0.225565	5.78282	7.34593e-09	9.94577e-08
TNFAIP6	27.9076	1.3192	0.256803	5.05653	4.26948e-07	4.39007e-06
GDF15	870.87	1.31135	0.14282	9.17665	4.44713e-20	1.68769e-18
FLOT2	3142.3	1.30859	0.106645	12.2688	1.33164e-34	1.00321e-32
SAA1	59.4156	1.30645	0.247661	5.23462	1.65328e-07	1.81789e-06
CHAC1	276.966	1.30336	0.149828	8.68285	3.85982e-18	1.28531e-16
NEURL1	11.7306	1.30099	0.284598	4.39669	1.09913e-05	8.49497e-05
SHF	258.795	1.30089	0.170218	7.62958	2.35513e-14	5.69799e-13
FHL1	3336.18	1.29916	0.105194	12.3483	4.97432e-35	3.82319e-33
TRABD2B	14.4334	1.29728	0.280701	4.47812	7.53043e-06	6.05059e-05
FAM83F	95.0727	1.29448	0.175966	7.31828	2.51161e-13	5.57168e-12
MYH11	19.5178	1.29082	0.277287	4.56323	5.03722e-06	4.21652e-05
PRR5L	41.6329	1.28779	0.22038	5.77492	7.69887e-09	1.03683e-07
DCUN1D3	323.984	1.28655	0.126165	10.1821	2.38337e-24	1.18918e-22
TNFSF10	812.607	1.28416	0.10865	11.813	3.34577e-32	2.31436e-30
GPR161	222.262	1.28333	0.137112	9.33896	9.72877e-21	3.83556e-19
EFEMP1	103.677	1.28259	0.180443	7.07646	1.4788e-12	3.08702e-11
SLC7A5	3339.64	1.28205	0.124547	10.2926	7.60803e-25	3.93806e-23
RIMKLB	1852.31	1.27769	0.223341	5.72331	1.04471e-08	1.3753e-07
SOWAHB	139.59	1.27677	0.161841	7.86511	3.68775e-15	9.70939e-14
KLK13	6.88764	1.27649	0.278023	4.09453	4.23028e-05	0.000286118
SULT1E1	10.7798	1.2761	0.286365	4.30767	1.64985e-05	0.000122655
INSC	6.84204	1.27453	0.283143	4.082	4.465e-05	0.000300125
PC	931.528	1.27393	0.0883354	14.4143	4.20826e-47	4.64068e-45
LMO2	78.8238	1.27335	0.185324	6.82904	8.54832e-12	1.63839e-10
CELSR2	117.549	1.27044	0.196204	6.45299	1.09662e-10	1.86879e-09
IFI6	2961.96	1.2697	0.126077	10.0694	7.54694e-24	3.60029e-22
STON2	291.98	1.26943	0.131799	9.618	6.71207e-22	2.91009e-20
LPAR6	78.3168	1.26709	0.204858	6.14964	7.76589e-10	1.19738e-08
IFI16	925.632	1.26565	0.113977	11.0992	1.26639e-28	7.67809e-27
GAS6	140.354	1.26506	0.172183	7.32829	2.33116e-13	5.18649e-12
FAM150A	9.96544	1.26421	0.286357	4.22223	2.41897e-05	0.000173478
EPS8L1	1195.55	1.26071	0.145906	8.6375	5.74556e-18	1.88846e-16
ZNF365	8.41478	1.25938	0.286093	4.1761	2.96553e-05	0.000207874
MATN2	768.364	1.25894	0.109026	11.541	8.1954e-31	5.39903e-29
LURAP1L	676.024	1.25766	0.122257	10.2808	8.59836e-25	4.4206e-23
ITPKC	528.146	1.25736	0.124819	10.0646	7.917e-24	3.74164e-22
ACER2	114.856	1.25592	0.161867	7.729	1.08395e-14	2.73559e-13
GAL3ST4	8.60151	1.25311	0.286377	4.15048	3.31774e-05	0.000229915
MCTP2	205.671	1.25295	0.152996	8.17203	3.03255e-16	8.79036e-15
FSCN1	5348.83	1.25239	0.112794	11.1025	1.21968e-28	7.45424e-27
CYP4F3	245.988	1.25232	0.152449	8.20312	2.34233e-16	6.84176e-15
KLK5	9.97834	1.24962	0.286345	4.19076	2.78026e-05	0.00019588
NCF1	14.8633	1.24799	0.27628	4.38915	1.13797e-05	8.77728e-05
UBR7	33.1055	1.24733	0.276452	4.49827	6.85087e-06	5.53966e-05
CELSR1	2243.1	1.24682	0.15299	8.14851	3.6845e-16	1.05595e-14
OASL	658.819	1.24627	0.136688	9.11221	8.07231e-20	3.01089e-18
SLC36A1	294.689	1.24323	0.163689	7.58648	3.2872e-14	7.85315e-13
SPOCK3	5.69044	1.2418	0.278566	3.90412	9.45705e-05	0.000585744
EXOC6B	501.202	1.24135	0.138342	8.96528	3.09498e-19	1.10562e-17
VWF	9.15172	1.2387	0.286554	4.12186	3.75823e-05	0.000256815
ALPK3	76.881	1.23693	0.197393	6.23002	4.66375e-10	7.4866e-09
IER5	877.441	1.2359	0.108007	11.4375	2.71589e-30	1.76626e-28
EMX1	10.2184	1.23366	0.286564	4.18766	2.81849e-05	0.000198298
LCE1F	6.15499	1.23339	0.277364	3.95631	7.61159e-05	0.00048405
GUCY1A3	27.6274	1.23221	0.259418	4.68537	2.79459e-06	2.474e-05
SRPX2	182.006	1.23159	0.147793	8.31283	9.34439e-17	2.80479e-15
MEIS3	19.5195	1.22934	0.264647	4.54021	5.61977e-06	4.65804e-05
RTP4	97.5819	1.22758	0.18031	6.77923	1.2082e-11	2.28686e-10
DNAH3	95.6897	1.22674	0.16856	7.2436	4.36915e-13	9.52576e-12
AJUBA	690.969	1.22642	0.128822	9.51583	1.80272e-21	7.59938e-20
TTC39A	393.067	1.22462	0.116288	10.5195	7.02478e-26	3.81797e-24
VANGL2	5.54225	1.22457	0.278324	3.86637	0.000110467	0.000669754
TP53AIP1	8.76809	1.22442	0.286003	4.10034	4.12541e-05	0.000279397
CYS1	9.82694	1.22172	0.284646	4.16966	3.05053e-05	0.000213243
ANXA10	741.68	1.21981	0.177124	6.88476	5.78833e-12	1.13222e-10
HLA-B	1670.39	1.21862	0.107474	11.3359	8.71552e-30	5.59632e-28
PPFIBP2	110.117	1.21397	0.159635	7.57398	3.61965e-14	8.62032e-13
LYPD5	47.4337	1.21189	0.20601	5.82737	5.63065e-09	7.78267e-08
CSTB	16974.5	1.20568	0.118079	10.2106	1.77772e-24	8.92849e-23
XYLT1	115.904	1.20171	0.158825	7.53818	4.76559e-14	1.12091e-12
RNF152	6.4764	1.20138	0.281401	3.92264	8.75851e-05	0.00054783
C3orf67	711.7	1.19855	0.106304	11.2686	1.87462e-29	1.18866e-27
RNF186	14.887	1.19795	0.2789	4.21254	2.52518e-05	0.000179992
APOBEC3A	6.2831	1.19735	0.28198	3.89383	9.8675e-05	0.000607458
ALG1L	237.429	1.19667	0.141092	8.46788	2.49901e-17	7.84124e-16
MT1X	428.57	1.19583	0.149642	7.98416	1.41487e-15	3.9077e-14
SDCCAG8	159.861	1.19345	0.212577	5.59832	2.16437e-08	2.71985e-07
MAF	6.14622	1.18599	0.275579	3.90851	9.28654e-05	0.000577062
CTSE	33.1633	1.18091	0.277633	4.24738	2.16282e-05	0.000156509
BAG3	1649.5	1.17994	0.10601	11.1282	9.14159e-29	5.60954e-27
C2orf54	69.6663	1.17697	0.224037	5.23081	1.68769e-07	1.85305e-06
EPN3	223.671	1.17609	0.168946	6.94941	3.66828e-12	7.31637e-11
EN1	105.563	1.1745	0.18946	6.17577	6.58418e-10	1.02452e-08
LSR	3506.98	1.17433	0.116438	10.0844	6.47555e-24	3.11851e-22
C1orf116	1158.63	1.17272	0.124073	9.4496	3.4013e-21	1.40274e-19
SLC26A9	9.88408	1.17141	0.286582	3.97988	6.89487e-05	0.000443475
CAPS	798.172	1.16849	0.13826	8.4483	2.95574e-17	9.17967e-16
TNFRSF21	2564.28	1.16701	0.116699	9.99893	1.54051e-23	7.10409e-22
NDRG2	565.27	1.16545	0.104657	11.1291	9.05745e-29	5.58042e-27
ATG9B	91.4432	1.16454	0.249236	4.65989	3.16376e-06	2.76384e-05
GPR157	42.7117	1.16436	0.237133	4.86815	1.12647e-06	1.07612e-05
WFDC2	184.171	1.16369	0.160343	7.2458	4.29881e-13	9.38584e-12
IFIT1	1611.96	1.16299	0.138433	8.39925	4.49354e-17	1.38989e-15
UBE2L6	315.77	1.16109	0.166953	6.94594	3.75947e-12	7.48843e-11
B3GNT8	12.1067	1.15674	0.283474	3.97345	7.08385e-05	0.000453903
CDKL5	92.3841	1.15494	0.222797	5.16818	2.3639e-07	2.54772e-06
PPARD	694.426	1.1523	0.104244	11.0476	2.25081e-28	1.3225e-26
DYSF	23.3765	1.15157	0.266375	4.26104	2.03475e-05	0.000148228
AMOTL1	1575.78	1.1515	0.149042	7.72468	1.12131e-14	2.82518e-13
SERPING1	20.1539	1.14943	0.275266	4.11656	3.84568e-05	0.000262085
AGT	27.2749	1.14863	0.246007	4.60419	4.14083e-06	3.53422e-05
P2RX6	14.4541	1.14813	0.277702	4.04244	5.2899e-05	0.000349703
PLXNA2	282.98	1.14665	0.160317	7.14514	8.99038e-13	1.90286e-11
PLLP	204.248	1.14637	0.161971	7.06828	1.56869e-12	3.27018e-11
BCAT1	87.6586	1.14622	0.21621	5.27755	1.30924e-07	1.46824e-06
THRB	430.9	1.14498	0.120629	9.48452	2.43496e-21	1.01244e-19
TMEM173	1130.8	1.14295	0.120241	9.50331	2.03329e-21	8.52415e-20
GINS3	382.199	1.14235	0.114024	10.0098	1.37992e-23	6.4416e-22
CDC42EP1	1232.52	1.14094	0.112915	10.1018	5.4249e-24	2.62918e-22
EDARADD	38.717	1.13987	0.226208	4.99639	5.84148e-07	5.84072e-06
MEF2A	799.686	1.13939	0.125126	9.10202	8.86648e-20	3.29098e-18
SRC	2233.92	1.13886	0.110524	10.3029	6.83876e-25	3.55196e-23
RNF144B	12.3017	1.13874	0.28378	3.9084	9.2909e-05	0.000577098
FAM83A	2796.65	1.13599	0.117351	9.67901	3.70282e-22	1.62391e-20
LRIG3	278.988	1.13595	0.146304	7.75483	8.84592e-15	2.24737e-13
EPAS1	1243.24	1.13368	0.107183	10.5742	3.92402e-26	2.1558e-24
NOS3	57.454	1.13038	0.239643	4.6904	2.72667e-06	2.42091e-05
PI4K2A	727.466	1.12926	0.121766	9.26963	1.86795e-20	7.19659e-19
TCN1	409.704	1.1271	0.112856	9.9785	1.89301e-23	8.62509e-22
TENM2	5.56288	1.12618	0.273597	3.7574	0.000171686	0.000991165
LHFP	62.0573	1.12461	0.196666	5.68153	1.33496e-08	1.71873e-07
GNE	1513.16	1.12235	0.119544	9.38701	6.17288e-21	2.49175e-19
CTSS	572.973	1.1209	0.119312	9.38939	6.03494e-21	2.44255e-19
C15orf62	119.96	1.12013	0.158478	7.04912	1.80059e-12	3.73824e-11
FOSL2	637.925	1.11921	0.124959	8.95174	3.49926e-19	1.2413e-17
PTPRU	1103.54	1.1177	0.122623	9.11222	8.07116e-20	3.01089e-18
SSH1	690.3	1.11731	0.130414	8.56327	1.09708e-17	3.50743e-16
CRLF2	21.5893	1.11725	0.283371	3.90371	9.47296e-05	0.000586491
FUT4	1066.35	1.1172	0.105499	10.5865	3.44359e-26	1.89871e-24
TMEM98	36.4389	1.11668	0.223015	4.95696	7.16037e-07	7.05285e-06
TMEM221	7.03491	1.1165	0.285301	3.73754	0.00018583	0.00106194
LMTK2	901.673	1.11547	0.127684	8.73309	2.47818e-18	8.36206e-17
MYCL	17.0944	1.1092	0.268081	4.06102	4.88582e-05	0.000325821
PPP1R13L	1292.9	1.1089	0.100921	10.9849	4.51535e-28	2.63275e-26
TNFSF11	11.9565	1.10861	0.283961	3.80579	0.000141353	0.000835832
MDGA1	17.923	1.10705	0.273277	4.00087	6.31094e-05	0.000408559
SLC6A14	5.18892	1.10345	0.277633	3.61133	0.000304635	0.00163698
UST	153.649	1.10006	0.14542	7.54767	4.43114e-14	1.0471e-12
TMPRSS2	29.6896	1.09693	0.248325	4.37838	1.19567e-05	9.16658e-05
HBEGF	1078.62	1.0958	0.15333	7.14471	9.0183e-13	1.90612e-11
GLI3	70.0682	1.09453	0.205145	5.31722	1.05364e-07	1.20266e-06
C20orf197	34.603	1.09437	0.251945	4.31001	1.6325e-05	0.000121543
SLC15A3	122.579	1.09328	0.177782	6.13382	8.57909e-10	1.31742e-08
CDH1	6563.75	1.09281	0.0932469	11.719	1.01825e-31	6.88701e-30
CCDC69	37.4638	1.09083	0.222274	4.86599	1.13883e-06	1.08589e-05
GJB4	1939.78	1.09029	0.079509	13.7105	8.78301e-43	8.73594e-41
RGS4	7.65447	1.08766	0.286011	3.66087	0.000251365	0.00138547
C6orf132	760.917	1.08708	0.10851	10.0143	1.31946e-23	6.1783e-22
LCE1E	32.7343	1.08654	0.272342	4.46122	8.14942e-06	6.5033e-05
TRPV4	619.573	1.08595	0.120199	9.0306	1.7074e-19	6.21609e-18
MT1F	251.079	1.08454	0.151074	7.17068	7.46274e-13	1.60634e-11
SERPINF1	37.5058	1.08354	0.239277	4.50027	6.78666e-06	5.50024e-05
SYT14	12.2345	1.08261	0.282978	3.74246	0.000182226	0.00104331
UNC5B	501.799	1.08116	0.142556	7.58024	3.44916e-14	8.22716e-13
ADRB2	83.1927	1.08085	0.182035	5.91502	3.31842e-09	4.71519e-08
RND3	742.614	1.08049	0.112339	9.61392	6.98414e-22	3.01089e-20
LCP1	13.9953	1.07977	0.282853	3.74145	0.000182962	0.00104713
TNNT2	22.4765	1.07801	0.272813	3.91267	9.12799e-05	0.000568603
PLCG2	162.913	1.0773	0.141327	7.60798	2.78413e-14	6.67228e-13
PLA2G4A	12.1657	1.07409	0.282304	3.71094	0.000206487	0.00116488
ZPLD1	5.11308	1.07405	0.276465	3.55772	0.000374093	0.00195567
HOMEZ	260.258	1.07179	0.14001	7.64645	2.06601e-14	5.06289e-13
IFIT3	559.919	1.07173	0.139368	7.68541	1.52509e-14	3.79851e-13
RRAD	30.5137	1.07081	0.237894	4.45081	8.55453e-06	6.79451e-05
ZNF185	1288.86	1.07079	0.0910476	11.7579	6.43454e-32	4.41085e-30
KRT9	6.11311	1.07039	0.280445	3.62147	0.000292933	0.00158136
ANK3	567.989	1.06973	0.131552	8.12789	4.3681e-16	1.24951e-14
CLDN16	22.0493	1.06771	0.273307	3.87002	0.000108828	0.00066246
GNA15	1641.03	1.06656	0.0927255	11.5002	1.31604e-30	8.63255e-29
ARHGAP40	6.04494	1.06493	0.281083	3.60479	0.00031241	0.0016705
HGD	66.4566	1.06409	0.197704	5.35349	8.62729e-08	9.94622e-07
PTH1R	7.33032	1.06092	0.282045	3.69369	0.000221027	0.0012348
MYO10	1089.45	1.05943	0.128895	8.21727	2.08193e-16	6.11638e-15
CBX6	427.89	1.05913	0.126147	8.39008	4.85819e-17	1.4966e-15
HOMER2	27.668	1.05902	0.254906	4.10978	3.96031e-05	0.000269294
LPCAT2	95.53	1.05695	0.181473	5.80506	6.43415e-09	8.80529e-08
ARHGAP30	17.4861	1.05571	0.267054	3.8859	0.000101951	0.000626107
PITX1	1362.53	1.05447	0.105524	9.99064	1.67496e-23	7.67758e-22
NECTIN2	1139.94	1.05119	0.111908	9.39096	5.9458e-21	2.41288e-19
RIMBP3	12.7541	1.05066	0.284311	3.64724	0.000265074	0.00145418
SLC9A1	408.966	1.05055	0.126935	8.27045	1.33455e-16	3.99002e-15
RAB3D	216.309	1.04711	0.149599	6.99053	2.73847e-12	5.54913e-11
FAM210B	1333.05	1.04704	0.0958587	10.9206	9.18796e-28	5.23679e-26
ARHGEF4	552.119	1.04689	0.145401	7.19658	6.17413e-13	1.33653e-11
TRIM22	16.8913	1.04445	0.28168	3.65341	0.000258781	0.00142273
HECW2	5.55962	1.04085	0.281776	3.49322	0.000477242	0.00242493
FBXL18	420.459	1.04068	0.126317	8.23326	1.82192e-16	5.38369e-15
CD82	1642.83	1.03795	0.114959	9.02765	1.75402e-19	6.37057e-18
LYNX1	28.9454	1.03631	0.261185	3.9367	8.26084e-05	0.000520337
KCNH8	28.2205	1.03565	0.270633	3.81374	0.000136881	0.000811856
GUCY1B3	24.8911	1.03429	0.277443	3.71496	0.000203239	0.00114977
ARRDC2	537.6	1.03394	0.101557	10.1755	2.54974e-24	1.26391e-22
IL1RAP	389.057	1.03393	0.18017	5.73423	9.7958e-09	1.29291e-07
SOD3	85.327	1.03259	0.182429	5.64017	1.69887e-08	2.16165e-07
RRBP1	1440.97	1.0316	0.105733	9.75477	1.75994e-22	7.85418e-21
PRSS8	1039.66	1.03094	0.145611	7.07814	1.46101e-12	3.05828e-11
GBP4	19.5242	1.03059	0.269244	3.7733	0.0001611	0.00093609
DHRS3	1465.57	1.02756	0.0920847	11.1569	6.62513e-29	4.09842e-27
NXPH4	18.9807	1.02639	0.264939	3.81996	0.000133472	0.000793738
MPP7	169.772	1.02481	0.14932	6.85053	7.35791e-12	1.42459e-10
PORCN	236.335	1.02435	0.138716	7.37571	1.63466e-13	3.6966e-12
USP28	620.357	1.02406	0.124353	8.23108	1.85535e-16	5.47186e-15
BLCAP	2524.58	1.02278	0.0776111	13.1769	1.19175e-39	1.06059e-37
ATP1A3	23.0887	1.02121	0.260795	3.86658	0.000110374	0.000669457
APOBEC3C	286.353	1.0191	0.121691	8.36656	5.93253e-17	1.80924e-15
KRT32	5.07435	1.01825	0.273623	3.47069	0.000519126	0.00260987
TMPRSS3	34.2774	1.01807	0.230863	4.37044	1.23995e-05	9.4727e-05
PPP1R14C	219.991	1.01578	0.14444	7.02273	2.17575e-12	4.49262e-11
ZNF362	164.825	1.01278	0.148512	6.80702	9.96399e-12	1.90015e-10
DAB2IP	946.554	1.01073	0.128937	7.83708	4.61141e-15	1.20341e-13
C3	84.6334	1.00814	0.205766	4.88125	1.05414e-06	1.01083e-05
ETS2	1072.27	1.0068	0.108248	9.29853	1.42398e-20	5.57073e-19
KLF7	880.893	1.00587	0.146401	6.86859	6.48405e-12	1.26506e-10
CXCL8	2186.75	1.00568	0.143601	7.00276	2.50977e-12	5.12667e-11
NOV	60.91	1.00471	0.196555	5.09131	3.55592e-07	3.71917e-06
HELZ2	1892.16	1.00336	0.132723	7.55867	4.07221e-14	9.65278e-13
CORO2A	2024.3	1.00331	0.0991576	10.1171	4.63896e-24	2.26996e-22
ITGA1	151.249	1.00254	0.158005	6.33384	2.39141e-10	3.96001e-09

## Sheet: Mouse stromal cells sig UP
Gene_ID	baseMean	log2FoldChange	lfcSE	stat	pvalue	padj
Cxcr2	132.333	2.78954	0.1978	13.4662	2.47e-41	8.63e-38
S100a9	850.779	2.6551	0.185008	14.3904	5.94e-47	8.3e-43
S100a8	375.486	2.62179	0.189966	13.7726	3.73e-43	2.6e-39
Retnlg	43.0206	1.99327	0.214205	8.7843	1.57e-18	1.83e-15
Asprv1	31.6149	1.96441	0.213856	7.80706	5.85e-15	4.81e-12
Chil3	78.0999	1.9623	0.21359	9.2039	3.45e-20	4.38e-17
Il1b	274.362	1.90545	0.158795	11.9382	7.48e-33	2.09e-29
Slfn4	432.927	1.89885	0.194235	9.80056	1.12e-22	2.23e-19
Sptssb	71.217	1.85045	0.212884	8.71195	2.99e-18	2.98e-15
Csf3r	366.673	1.84723	0.135598	13.5699	6.04e-42	2.81e-38
Adgrg7	23.8177	1.82903	0.212513	6.57555	4.85e-11	1.61e-08
Il1r2	95.2825	1.7831	0.187187	9.38806	6.11e-21	9.48e-18
Cxcl5	92.48	1.78196	0.210814	8.45434	2.81e-17	2.61e-14
Mxd1	156.016	1.75677	0.188174	9.28755	1.58e-20	2.2e-17
Stfa2l1	21.1627	1.72773	0.214094	7.21027	5.58e-13	3.25e-10
2310057J18Rik	23.8816	1.67898	0.211996	6.94708	3.73e-12	1.68e-09
Ugt2b34	38.7332	1.65216	0.213974	7.67879	1.61e-14	1.18e-11
Ambp	72.8794	1.62992	0.213042	7.68706	1.51e-14	1.17e-11
Pglyrp1	77.5726	1.59138	0.214128	7.63039	2.34e-14	1.63e-11
Tmprss4	47.2494	1.56487	0.209864	7.3675	1.74e-13	1.1e-10
Prom1	78.8464	1.51441	0.212722	7.16993	7.5e-13	4.03e-10
Gabrp	66.2824	1.50228	0.213003	7.04211	1.89e-12	9.12e-10
Psca	64.4801	1.49999	0.213546	7.06971	1.55e-12	7.74e-10
Hcar2	101.97	1.48065	0.207451	7.16169	7.97e-13	4.12e-10
Il1f9	18.801	1.47355	0.21321	6.49985	8.04e-11	2.44e-08
Cyp2c65	14.0626	1.46085	0.20666	6.56754	5.12e-11	1.66e-08
Olfm4	31.1855	1.46001	0.211833	7.00266	2.51e-12	1.17e-09
Sftpd	53.8422	1.42957	0.214148	6.71596	1.87e-11	7.45e-09
Cxcl2	58.5172	1.42865	0.212988	6.73867	1.6e-11	6.76e-09
Itgal	33.921	1.4034	0.206818	6.67036	2.55e-11	9.63e-09
Gcnt3	64.1573	1.37364	0.214202	6.52777	6.68e-11	2.07e-08
Gsta3	52.8162	1.3616	0.212696	6.40124	1.54e-10	4.39e-08
Tspan8	108.323	1.36017	0.201885	6.72343	1.77e-11	7.29e-09
Lcn2	947.322	1.35871	0.21416	6.5758	4.84e-11	1.61e-08
BC100530	13.2083	1.355	0.209043	5.73059	1e-08	2.1e-06
Mcemp1	28.7269	1.34218	0.20774	6.3072	2.84e-10	7.78e-08
Atp1b1	201.172	1.34173	0.205025	6.56326	5.26e-11	1.67e-08
Osgin1	67.91	1.33674	0.182769	7.25121	4.13e-13	2.51e-10
Ckmt1	44.794	1.29722	0.214136	6.15665	7.43e-10	1.96e-07
Ifit1bl1	51.1714	1.27027	0.213929	6.04727	1.47e-09	3.74e-07
Pzp	25.3547	1.26654	0.21078	5.89005	3.86e-09	8.84e-07
Trim30b	30.0918	1.25964	0.207511	5.95069	2.67e-09	6.32e-07
Gsta4	206.328	1.24677	0.208431	6.02115	1.73e-09	4.21e-07
Gm5483	16.933	1.23872	0.21177	5.75238	8.8e-09	1.89e-06
Oas3	63.892	1.23454	0.189154	6.48307	8.99e-11	2.67e-08
Hp	620.617	1.23402	0.199126	6.21404	5.16e-10	1.39e-07
Dedd2	67.2893	1.23349	0.179956	6.8082	9.88e-12	4.31e-09
Gpx2	64.1794	1.2276	0.213178	5.79753	6.73e-09	1.52e-06
Ehf	95.0057	1.22217	0.202379	6.01963	1.75e-09	4.21e-07
Wfdc21	12.47	1.22039	0.209365	5.50483	3.7e-08	6.64e-06
Lypd8	265.877	1.20974	0.203934	7.19526	6.23e-13	3.48e-10
Ltf	256.755	1.20769	0.197011	9.55134	1.28e-21	2.23e-18
Phgr1	15.1247	1.20368	0.20618	5.68712	1.29e-08	2.61e-06
Spatc1	8.97309	1.20096	0.206951	5.07159	3.95e-07	5.05e-05
Slc28a3	43.1655	1.19916	0.210894	5.64795	1.62e-08	3.19e-06
Siglecf	14.1286	1.18946	0.213186	5.43325	5.53e-08	9.42e-06
Sorl1	72.7774	1.18459	0.203278	5.79467	6.85e-09	1.52e-06
Phospho1	56.6046	1.18292	0.182889	6.41726	1.39e-10	4.04e-08
Cldn18	34.0878	1.17488	0.210292	5.77977	7.48e-09	1.63e-06
Atp2a3	38.7363	1.1703	0.208729	5.571	2.53e-08	4.84e-06
Ifitm1	133.024	1.15391	0.173804	6.61415	3.74e-11	1.34e-08
Sult1c2	27.9103	1.1536	0.212095	5.55596	2.76e-08	5.21e-06
Cxcl1	97.791	1.14626	0.206927	5.55204	2.82e-08	5.26e-06
Fgfr4	17.5014	1.1426	0.213907	5.20821	1.91e-07	2.89e-05
Erich5	14.9848	1.14072	0.205645	5.45219	4.98e-08	8.63e-06
Tenm4	17.2589	1.13198	0.210314	5.29645	1.18e-07	1.9e-05
Rsad2	111.689	1.1276	0.198812	5.66366	1.48e-08	2.96e-06
Vil1	31.3946	1.12469	0.213932	5.23864	1.62e-07	2.51e-05
Pof1b	11.7634	1.12366	0.211008	5.14376	2.69e-07	3.8e-05
Prap1	12.1516	1.11674	0.19861	5.25451	1.48e-07	2.33e-05
Tacstd2	19.7356	1.10462	0.213341	5.16469	2.41e-07	3.54e-05
Slc39a4	37.5208	1.09761	0.208858	5.20016	1.99e-07	2.99e-05
Gjb1	40.1905	1.09017	0.21334	5.11275	3.17e-07	4.3e-05
Fpr2	31.3464	1.08025	0.210527	5.08618	3.65e-07	4.86e-05
Slfn1	68.5973	1.06404	0.198152	5.35343	8.63e-08	1.42e-05
Sgpp2	18.6661	1.0634	0.212175	4.99965	5.74e-07	6.8e-05
Vsig2	47.9724	1.06233	0.210639	5.03473	4.79e-07	5.9e-05
Wwc1	36.382	1.06218	0.208889	5.03346	4.82e-07	5.9e-05
Cited4	11.2189	1.06132	0.209761	4.89318	9.92e-07	0.00011264
Pigr	323.559	1.05752	0.198869	6.60249	4.04e-11	1.41e-08
Slc37a1	89.2638	1.05502	0.204619	5.14827	2.63e-07	3.75e-05
Il1rn	163.762	1.05408	0.177309	5.93533	2.93e-09	6.82e-07
Cp	878.273	1.04981	0.15647	6.70702	1.99e-11	7.71e-09
Sh2d3c	70.8191	1.04933	0.190256	5.48948	4.03e-08	7.13e-06
Car2	172.607	1.04671	0.210505	5.26272	1.42e-07	2.25e-05
Mmp9	381.126	1.04174	0.213925	5.00662	5.54e-07	6.61e-05
Trem1	51.6321	1.03591	0.190709	5.39101	7.01e-08	1.16e-05
Tmem45b	18.37	1.0321	0.211249	4.90222	9.48e-07	0.000108463
Muc4	29.2472	1.02772	0.213793	4.7945	1.63e-06	0.000173839
Slc9a4	17.6078	1.02535	0.213331	4.75836	1.95e-06	0.000203388
Vnn1	36.3722	1.02283	0.212794	4.92751	8.33e-07	9.61e-05
Mmp7	413.928	1.01493	0.200088	5.08313	3.71e-07	4.89e-05
Entpd3	35.9244	1.00259	0.207949	4.79632	1.62e-06	0.00017362
Wfdc2	71.3982	0.999229	0.21294	4.72678	2.28e-06	0.000229158
Kcnk5	13.4104	0.998906	0.213451	4.59261	4.38e-06	0.00039952
Sell	23.1947	0.997443	0.209228	4.80805	1.52e-06	0.00016758
Clec4e	67.721	0.992915	0.191679	5.15255	2.57e-07	3.74e-05
Ttr	32.8894	0.992261	0.211887	4.8364	1.32e-06	0.000147693
2210407C18Rik	137.753	0.988789	0.207695	5.11456	3.14e-07	4.3e-05
Fgr	81.6889	0.986129	0.177207	5.53589	3.1e-08	5.69e-06
Ugt2b35	8.65299	0.980845	0.191741	5.06797	4.02e-07	5.1e-05
Lrg1	238.11	0.976884	0.170398	5.72929	1.01e-08	2.1e-06
Lyst	55.9797	0.974819	0.208891	4.641	3.47e-06	0.000333914
Tspan1	24.6179	0.973645	0.213435	4.61108	4.01e-06	0.000370451
Clca1	499.457	0.971615	0.187865	8.75393	2.06e-18	2.21e-15
Adgre5	200.09	0.968682	0.152954	6.31966	2.62e-10	7.32e-08
Slc1a1	12.4104	0.966995	0.211204	4.55175	5.32e-06	0.000470198
Muc5ac	14.4188	0.9665	0.201658	4.82221	1.42e-06	0.000157344
Ccrl2	85.5754	0.964138	0.176335	5.45118	5e-08	8.63e-06
Paqr8	22.5805	0.961555	0.212448	4.46857	7.87e-06	0.000646809
Lad1	56.2881	0.960774	0.213705	4.50012	6.79e-06	0.000574764
Oit1	14.7616	0.95538	0.204501	4.78382	1.72e-06	0.000180583
Tm4sf4	103.196	0.954492	0.20661	4.61957	3.85e-06	0.000360383
Gkn1	669.355	0.951579	0.188902	7.60056	2.95e-14	1.96e-11
Gm1966	40.3597	0.950519	0.196585	4.79629	1.62e-06	0.00017362
Nfe2	13.8859	0.950058	0.210049	4.51313	6.39e-06	0.000550609
Sort1	70.5403	0.949786	0.184787	5.11456	3.14e-07	4.3e-05
Csf3	9.79608	0.939216	0.202201	4.57242	4.82e-06	0.00042881
Epcam	205.119	0.938816	0.205181	4.58152	4.62e-06	0.000413196
Cldn7	63.2328	0.937058	0.212353	4.4098	1.03e-05	0.000804865
Mpo	11.7654	0.935996	0.202688	4.68459	2.81e-06	0.000277821
Slc26a9	11.149	0.933092	0.207703	4.3853	1.16e-05	0.000883837
Slc44a4	26.2566	0.927786	0.213785	4.36245	1.29e-05	0.000945243
Fam83e	16.0698	0.924719	0.213527	4.2979	1.72e-05	0.00121603
Tff1	680.034	0.923833	0.204139	4.97042	6.68e-07	7.84e-05
Clec4d	143.121	0.915462	0.179728	5.08095	3.76e-07	4.9e-05
Agpat9	20.3981	0.912675	0.21331	4.2325	2.31e-05	0.00152949
Gm3776	19.0121	0.912148	0.196217	4.95872	7.1e-07	8.26e-05
Gkn2	560.346	0.909171	0.18559	7.9309	2.18e-15	1.9e-12
Avil	9.97088	0.907946	0.20535	4.38389	1.17e-05	0.000884742
Coro2a	43.084	0.904184	0.206138	4.37019	1.24e-05	0.000927009
Tmem54	10.2434	0.901405	0.201612	4.49643	6.91e-06	0.000581305
Trem3	8.13162	0.89756	0.202199	4.27709	1.89e-05	0.00129615
Atp1a3	63.1141	0.897162	0.206588	4.3209	1.55e-05	0.00111277
Slc9a2	11.2277	0.891422	0.196668	4.67744	2.9e-06	0.00028365
Slc12a2	159.515	0.891018	0.173236	5.13773	2.78e-07	3.88e-05
B3gnt3	50.597	0.888854	0.200885	4.40921	1.04e-05	0.000804865
Ly6d	232.417	0.886501	0.205818	4.61985	3.84e-06	0.000360383
Acp5	542.157	0.886136	0.184936	4.79237	1.65e-06	0.000174365
Pllp	18.3	0.885349	0.207643	4.36577	1.27e-05	0.000940885
Spink6	10.1338	0.881684	0.208713	4.15193	3.3e-05	0.00210212
Hr	12.6272	0.88018	0.21336	4.07594	4.58e-05	0.00275845
Gpd1	30.3026	0.88012	0.21232	4.11899	3.81e-05	0.00238288
Pag1	43.6766	0.879681	0.202878	4.30035	1.71e-05	0.00120877
Spint2	211.506	0.878255	0.200251	4.38896	1.14e-05	0.000873846
Elf3	78.2714	0.877518	0.210737	4.17321	3e-05	0.00195065
Spink4	62.8883	0.875482	0.184647	6.63045	3.35e-11	1.23e-08
Slc44a3	24.0183	0.87331	0.213669	4.05818	4.95e-05	0.00292631
Gsta1	22.1098	0.872893	0.198402	4.71487	2.42e-06	0.000241244
Ppp1r1b	6.9961	0.872572	0.196276	4.28138	1.86e-05	0.00129105
Pram1	23.5085	0.87185	0.211794	4.08834	4.34e-05	0.00263786
Epn3	24.822	0.871293	0.213544	4.06055	4.9e-05	0.00292159
Anxa13	31.4994	0.870431	0.213335	4.12192	3.76e-05	0.00236336
Rasal1	16.4865	0.862261	0.214034	3.9877	6.67e-05	0.0036678
Mmp8	20.0447	0.855619	0.203976	4.27906	1.88e-05	0.00129105
Muc13	16.8526	0.85108	0.204678	4.27967	1.87e-05	0.00129105
Slc35c1	65.8265	0.848639	0.178427	4.7375	2.16e-06	0.000220536
Parm1	20.9033	0.847149	0.211193	4.0123	6.01e-05	0.00339947
Ccl28	8.08728	0.846161	0.185759	4.53632	5.72e-06	0.000499591
Adora1	15.5488	0.845254	0.212454	3.97028	7.18e-05	0.0038854
Tmprss2	34.5902	0.844244	0.214197	3.95365	7.7e-05	0.00413382
Scara3	387.266	0.840725	0.166154	5.05652	4.27e-07	5.32e-05
Car9	82.3159	0.839932	0.206683	4.05881	4.93e-05	0.00292631
Misp	34.2411	0.83983	0.20867	4.01565	5.93e-05	0.00336514
Ces2c	10.4781	0.838604	0.19463	4.39367	1.11e-05	0.000859841
Duoxa2	30.9671	0.838511	0.213898	3.93264	8.4e-05	0.00449512
Mansc1	16.9064	0.836233	0.214209	3.87751	0.000105532	0.00533931
Ltb	24.46	0.834628	0.213737	3.87651	0.000105965	0.00534184
Akr1b7	13.4955	0.832557	0.199747	4.33189	1.48e-05	0.00106923
Sh2d4a	25.0093	0.831533	0.214132	3.85017	0.000118037	0.00583752
Rnf128	59.6543	0.830936	0.18417	4.50443	6.66e-06	0.00057014
Rab11fip1	37.4227	0.827434	0.213601	3.84741	0.000119376	0.00584898
Cd177	13.1253	0.825056	0.206704	3.99593	6.44e-05	0.00357086
Zc3h12a	80.4303	0.82295	0.173322	4.73468	2.19e-06	0.000222012
Mtcl1	24.2739	0.818953	0.212055	3.82797	0.000129203	0.00626456
Lrp5	87.9373	0.812142	0.206099	3.928	8.57e-05	0.00456522
Il17ra	96.1145	0.811602	0.174695	4.62952	3.67e-06	0.000350551
Gsto1	295.494	0.809752	0.189248	4.28116	1.86e-05	0.00129105
Cd24a	260.238	0.808694	0.197662	4.09292	4.26e-05	0.00259751
P2ry2	43.3629	0.802818	0.204128	3.9145	9.06e-05	0.00477372
Fgfr2	55.5368	0.80219	0.20653	3.87826	0.000105206	0.00533931
Ppp1r3b	106.422	0.800993	0.198458	4.0409	5.32e-05	0.00308518
Chdh	32.1691	0.799122	0.204894	3.87808	0.000105283	0.00533931
Kcnk1	26.6571	0.796598	0.213395	3.74531	0.00018017	0.00822188
Ltb4r1	16.23	0.796082	0.213626	3.67175	0.000240896	0.0103428
Sema4a	74.0831	0.795601	0.204828	3.87272	0.000107627	0.00540614
Itih5	57.6464	0.795579	0.214204	3.72079	0.000198597	0.00888851
Bst1	86.2558	0.794454	0.190351	4.16249	3.15e-05	0.00202576
Myo1a	9.02638	0.793469	0.203387	3.86861	0.000109459	0.00547842
Sirpb1b	24.5409	0.793428	0.21084	3.73939	0.000184466	0.00836328
Nlrp12	6.66168	0.792909	0.188344	4.08479	4.41e-05	0.00266685
Clic6	20.5297	0.792209	0.211764	3.737	0.000186232	0.00839228
Cmpk2	51.5854	0.791916	0.185412	4.25316	2.11e-05	0.00141778
Adamtsl4	54.5337	0.790651	0.196671	4.00771	6.13e-05	0.00345214
Cldn3	65.2543	0.790259	0.19144	4.11765	3.83e-05	0.00238609
Slc40a1	48.3264	0.787778	0.211029	3.72082	0.000198577	0.00888851
Krt8	652.472	0.785654	0.200494	3.92407	8.71e-05	0.00462279
Rab44	11.5953	0.784903	0.211544	3.65641	0.000255774	0.0108231
Hspa1a	21.1189	0.780659	0.21221	3.65155	0.000260661	0.0109351
Dpcr1	40.1443	0.779977	0.183423	5.33938	9.33e-08	1.51e-05
Gkn3	23.8027	0.779802	0.213467	3.67115	0.000241461	0.0103428
Mefv	27.746	0.778568	0.204953	3.76706	0.000165183	0.00763779
Aadac	6.14729	0.778412	0.18076	4.48504	7.29e-06	0.000602358
Atp10b	9.12394	0.778047	0.202532	3.80274	0.000143106	0.006774
Helz2	126.018	0.777871	0.18818	4.12265	3.75e-05	0.00236336
Pamr1	32.8412	0.777379	0.213585	3.63129	0.000282006	0.0115482
Oasl1	103.107	0.776812	0.168646	4.60493	4.13e-06	0.000379052
Rab25	22.1281	0.774642	0.211143	3.70225	0.000213699	0.00938599
Myh14	30.9281	0.774238	0.213512	3.62406	0.000290012	0.0118413
C4bp	9.25161	0.770901	0.194618	4.05322	5.05e-05	0.00295156
Tc2n	17.3172	0.765988	0.214134	3.56278	0.000366942	0.0144745
Dgat2	27.6946	0.762258	0.212174	3.65144	0.00026077	0.0109351
Hpn	53.3715	0.762241	0.20193	3.76242	0.000168275	0.0077296
Tnfsf10	26.5658	0.76036	0.212542	3.55736	0.000374607	0.0147352
Serpina3g	131.087	0.760295	0.147459	5.14815	2.63e-07	3.75e-05
Atp1a1	910.527	0.758115	0.148664	5.09888	3.42e-07	4.59e-05
Dsc2	28.1215	0.756469	0.214088	3.51656	0.000437185	0.0166799
Mlph	37.1656	0.754058	0.21262	3.53421	0.000408995	0.0158205
Tesc	19.1973	0.753385	0.213881	3.50443	0.000457578	0.0172382
Cd14	963.113	0.751943	0.149751	5.02087	5.14e-07	6.25e-05
Gc	135.241	0.751554	0.197137	3.8115	0.000138127	0.00665106
Fer1l4	6.30599	0.750115	0.185558	3.98297	6.81e-05	0.00371236
Slc34a2	10.5365	0.74849	0.199004	3.78209	0.000155517	0.00728739
Acnat1	12.2516	0.748477	0.210295	3.55541	0.00037739	0.014803
0610040J01Rik	52.3797	0.747998	0.19805	3.76447	0.000166902	0.00769183
Pld1	87.8351	0.745648	0.169974	4.37831	1.2e-05	0.000902763
Sdcbp2	18.1516	0.744865	0.213933	3.44667	0.000567533	0.0204781
Rhov	18.1011	0.744556	0.209408	3.63202	0.00028121	0.0115482
Ifit1bl2	7.82748	0.744544	0.191445	4.00323	6.25e-05	0.00349009
Tff3	7.04834	0.741097	0.184037	4.05479	5.02e-05	0.0029441
Crp	27.5259	0.738632	0.213949	3.44681	0.000567238	0.0204781
Fgd3	66.7993	0.737633	0.188407	3.89853	9.68e-05	0.00502379
Clmn	33.9333	0.733526	0.213752	3.41729	0.000632482	0.0222468
Tmc4	65.4825	0.733308	0.207611	3.52188	0.0004285	0.0163934
Alcam	123.331	0.732434	0.164635	4.44196	8.91e-06	0.000719535
E2f2	25.0995	0.731041	0.213215	3.40275	0.000667108	0.0232307
Mal2	84.7718	0.731031	0.20869	3.50419	0.000457991	0.0172382
Ceacam2	33.7412	0.730977	0.213769	3.41145	0.000646175	0.0226192
Creb3l1	161.264	0.730915	0.172374	4.23648	2.27e-05	0.0015098
Cass4	12.7702	0.730045	0.213911	3.37364	0.000741809	0.0253267
Isg20	81.0211	0.729788	0.186537	3.90907	9.27e-05	0.00486394
Spint1	62.9951	0.729716	0.210747	3.4651	0.000530038	0.0192746
Kdm6b	61.5069	0.727503	0.175484	4.13467	3.55e-05	0.00225624
Trf	1265.65	0.724734	0.188367	3.84908	0.00011856	0.00583752
Nqo1	23.8018	0.724167	0.213945	3.39857	0.000677399	0.0235303
Stard10	108.944	0.723902	0.197732	3.6633	0.000248991	0.0106003
Aqp3	11.808	0.720867	0.186743	4.17527	2.98e-05	0.00194209
Cd101	21.7528	0.719833	0.212907	3.36174	0.000774541	0.0262517
Anxa10	71.3929	0.719639	0.213789	3.37384	0.000741267	0.0253267
Acox2	8.39695	0.718606	0.198762	3.69413	0.000220641	0.00962821
Mme	14.6059	0.718386	0.194447	3.80487	0.000141877	0.006774
Clca3a2	22.7441	0.71781	0.213809	3.33499	0.000853031	0.0277663
Lamc2	86.8455	0.717158	0.196531	3.63986	0.00027279	0.0112699
Ildr1	11.9476	0.717023	0.209981	3.42014	0.000625891	0.0220706
Cdk2ap2	177.475	0.717	0.161516	4.43974	9.01e-06	0.00072282
Cldn2	179.475	0.716645	0.199637	3.84875	0.000118724	0.00583752
Prok2	5.17245	0.71599	0.178429	4.26439	2e-05	0.00136543
F2rl1	20.7877	0.714942	0.214073	3.30684	0.000943541	0.0299769
2810459M11Rik	6.67518	0.714533	0.191295	3.76909	0.000163844	0.00760106
Ddx60	51.3528	0.714043	0.177634	4.00501	6.2e-05	0.00347774
Ccr1	361.808	0.713092	0.152318	4.6801	2.87e-06	0.000281967
BC021891	21.7791	0.711783	0.21201	3.3361	0.000849626	0.0277663
Tfrc	125.889	0.71129	0.186762	3.80439	0.000142157	0.006774
Rassf9	5.95199	0.711122	0.194732	3.5503	0.000384798	0.0150093
AA467197	29.1135	0.7102	0.210115	3.37748	0.000731529	0.0252224
Egln3	176.564	0.707479	0.207132	3.42155	0.000622657	0.0220643
Cep170b	74.4825	0.70674	0.199063	3.53975	0.00040051	0.0155786
Pard6b	22.2858	0.706475	0.211921	3.30654	0.00094456	0.0299769
Urah	15.2684	0.703858	0.212911	3.30284	0.000957114	0.0302379
Tstd1	20.4701	0.703688	0.214205	3.29176	0.000995612	0.0309637
Dsp	55.8123	0.703598	0.210273	3.33744	0.000845543	0.0277163
Themis2	100.646	0.697448	0.163687	4.25273	2.11e-05	0.00141778
Camp	19.0522	0.696961	0.202394	3.59333	0.00032648	0.0129903
Tmc5	18.6487	0.696413	0.214206	3.23805	0.00120349	0.0357566
Rbp2	6.81415	0.696368	0.183853	3.89891	9.66e-05	0.00502379
Bcl3	106.726	0.695826	0.16934	4.10138	4.11e-05	0.00252637
Soat2	28.7573	0.693961	0.20734	3.33768	0.00084482	0.0277163
Slc9b2	29.56	0.693831	0.212441	3.2509	0.0011504	0.0344725
Pah	26.2924	0.693745	0.21327	3.29877	0.000971097	0.0305546
2810474O19Rik	126.738	0.693298	0.177183	3.90431	9.45e-05	0.00494194
Gcnt2	203.11	0.692873	0.152258	4.5489	5.39e-06	0.000473609
Lamb3	40.2022	0.692074	0.211961	3.25559	0.00113159	0.0341284
Pfkfb3	132.721	0.691908	0.170305	4.05672	4.98e-05	0.00293219
Kcnn4	106.88	0.691648	0.198453	3.48706	0.000488368	0.0181855
F10	50.5328	0.689469	0.213215	3.27899	0.0010418	0.0319028
Tlr6	36.1122	0.689387	0.204793	3.34417	0.000825302	0.0274393
Sema6a	28.1845	0.689341	0.213352	3.20084	0.00137028	0.0396982
Il18rap	32.4388	0.688114	0.202762	3.37615	0.000735086	0.0252299
Prss32	5.46018	0.688074	0.171737	4.7529	2.01e-06	0.000207415
Ralgapa2	34.1657	0.68685	0.205677	3.32115	0.000896484	0.0289776
Hook1	15.2825	0.686076	0.214206	3.17823	0.00148178	0.0421418
Saa3	3771.12	0.684368	0.20361	3.53152	0.000413172	0.0159379
Abcc8	5.67779	0.684143	0.193099	3.48357	0.000494773	0.018289
Proser2	23.9344	0.683318	0.214115	3.19527	0.00139701	0.0403305
Hspa1b	50.8435	0.681381	0.194638	3.48804	0.000486573	0.0181671
Cdh1	226.243	0.681271	0.205308	3.32051	0.000898545	0.0289776
Sectm1b	6.30482	0.680411	0.176983	3.84416	0.000120968	0.0059063
Nfkbia	253.473	0.677592	0.152738	4.43238	9.32e-06	0.00074368
Apol9b	37.1327	0.676613	0.205812	3.28611	0.00101582	0.0313826
Slc16a2	86.5033	0.675614	0.186486	3.61244	0.000303335	0.0123133
Gm3336	9.66216	0.673541	0.19199	3.70219	0.000213746	0.00938599
Ap1m2	22.2413	0.672997	0.214057	3.13656	0.00170945	0.0464412
Samd9l	186.886	0.671272	0.137856	4.86451	1.15e-06	0.000129216
Vtcn1	36.4622	0.670926	0.211954	3.15471	0.0016066	0.044513
Ankrd33b	20.5658	0.670787	0.210932	3.16003	0.00157753	0.0440573
Cdh17	24.3445	0.669395	0.214203	3.11041	0.00186827	0.0499781
Sycp2	7.95944	0.669152	0.197735	3.38354	0.000715588	0.0247338
Gm5150	24.1392	0.667914	0.209881	3.15847	0.00158599	0.044117
Clu	5897.32	0.665845	0.21342	3.13807	0.00170062	0.0464412
Lurap1l	58.4701	0.662577	0.210645	3.14571	0.00165685	0.0454542
Calca	29.4389	0.659472	0.213607	3.07885	0.00207799	0.0542376
Zfp36	189.917	0.658784	0.130069	5.06152	4.16e-07	5.23e-05
Bdh1	11.8796	0.657742	0.212879	3.05404	0.00225781	0.0572197
Krt23	31.0728	0.657639	0.213124	3.07609	0.00209736	0.0544799
Plekha6	41.4119	0.656487	0.21083	3.10541	0.00190014	0.050606
Ifi44	103.14	0.654673	0.164002	3.99088	6.58e-05	0.0036333
Apobr	62.5651	0.65441	0.170237	3.83381	0.000126172	0.00613888
Ugt8a	4.69247	0.652229	0.179734	3.51423	0.000441028	0.0167351
Slc2a2	4.73118	0.651913	0.182097	3.47232	0.000515976	0.018911
Klra17	16.2528	0.651346	0.214167	3.04604	0.00231879	0.0582367
Pim1	119.189	0.650939	0.159806	4.06631	4.78e-05	0.00286254
Fam3b	13.0447	0.65006	0.200088	3.28829	0.00100799	0.0312098
Il1a	38.2708	0.649975	0.213327	3.06655	0.00216548	0.0557757
Sema4g	14.1185	0.648675	0.214175	3.03312	0.0024204	0.0603545
Fut2	14.5037	0.648393	0.202329	3.24004	0.00119513	0.0355838
Smim6	9.11339	0.647238	0.187928	3.61563	0.000299619	0.0121979
Mkrn2os	9.86462	0.647132	0.196336	3.3409	0.000835077	0.0275024
Dtx3l	103.021	0.647009	0.157626	4.09934	4.14e-05	0.00253757
Mrgpra2b	4.7176	0.646473	0.185404	3.44224	0.000576909	0.0207384
Marveld3	11.2075	0.645832	0.210644	3.06579	0.00217098	0.0557757
Capn13	14.2826	0.644926	0.199263	3.35398	0.00079657	0.0267164
5330417C22Rik	16.8017	0.641581	0.214197	3.01501	0.00256968	0.0634385
Cxcl17	13.7801	0.640708	0.213843	2.99919	0.00270697	0.0657395
Fam65b	26.388	0.640409	0.213838	2.97914	0.00289056	0.0687629
H2-T24	19.5065	0.639842	0.214141	2.96448	0.0030319	0.0710347
Cblc	26.8867	0.63782	0.214196	2.97964	0.00288588	0.0687629
Hpgd	15.3356	0.6378	0.205268	3.13351	0.00172727	0.0467434
Cryaa	10.9374	0.635533	0.198392	3.30872	0.000937235	0.0298802
Arhgef19	18.1734	0.635444	0.211705	2.98725	0.00281497	0.0678898
Csrnp1	64.8391	0.633648	0.182112	3.4701	0.000520257	0.0189803
Stc2	13.106	0.632903	0.208083	3.02144	0.00251572	0.062397
Paqr5	15.279	0.630198	0.20564	3.07586	0.00209898	0.0544799
Kcne3	82.1796	0.629303	0.206671	3.04934	0.00229346	0.0579129
Krt18	395.63	0.628512	0.193658	3.24697	0.00116641	0.0348029
Cfi	63.4357	0.626501	0.206531	3.02918	0.00245221	0.0610387
Ppp1r3d	26.6343	0.624833	0.210611	2.96166	0.0030599	0.0712344
Elovl7	16.6077	0.621758	0.214151	2.89507	0.00379079	0.0836249
Krt19	311.054	0.621325	0.213123	2.95168	0.0031605	0.0730683
AA986860	22.9561	0.620937	0.214042	2.88779	0.00387964	0.0849142
Ccl2	173.444	0.618936	0.167927	3.68271	0.000230768	0.0099458
Slc4a4	45.3608	0.61792	0.214179	2.88942	0.00385958	0.0846079
Zfpm1	64.6255	0.617836	0.18332	3.36053	0.000777928	0.0263026
Tnfaip3	93.3162	0.616788	0.195927	3.14374	0.00166802	0.0456711
Abi3	170.669	0.616698	0.173683	3.55177	0.00038265	0.0149673
Fxyd3	91.8606	0.615481	0.210433	2.9324	0.00336352	0.0764954
Ppif	35.2669	0.614687	0.203493	3.01539	0.0025665	0.0634385
Lgals3bp	674.134	0.613626	0.168865	3.6337	0.000279385	0.0115083
Fam234b	51.2886	0.613446	0.193669	3.1618	0.00156795	0.0438775
Tmem229a	7.92787	0.612552	0.185511	3.34962	0.000809226	0.0270336
Slc13a3	9.71542	0.612126	0.207413	2.92852	0.00340577	0.0768341
Efnb2	47.4358	0.611968	0.192011	3.17157	0.00151616	0.0426847
Hnf4a	31.8721	0.611516	0.213814	2.85798	0.00426342	0.0908553
Vsig1	9.42911	0.611239	0.200236	3.05043	0.00228516	0.0578079
Mogat2	5.61877	0.610426	0.18009	3.52282	0.000426986	0.0163803
Amer2	4.5433	0.609756	0.181174	3.28375	0.00102435	0.0315065
Slc22a23	19.8874	0.609403	0.214122	2.83007	0.00465383	0.0972846
Nos2	59.8103	0.609038	0.214149	2.853	0.00433083	0.0917689
Gja4	32.5467	0.607427	0.213136	2.86305	0.00419589	0.0899936
Shroom3	65.5052	0.606237	0.206173	2.93543	0.00333085	0.0762491
Sprr2a3	79.0125	0.605766	0.186955	3.60558	0.000311459	0.0125337
Tinagl1	90.8093	0.605224	0.191765	3.14887	0.00163905	0.0452521
Tjp3	42.1935	0.603432	0.212156	2.83339	0.00460565	0.0964218
Hnf1b	26.2629	0.602836	0.210214	2.85537	0.00429873	0.0912271
Treml4	6.91205	0.602367	0.201033	2.94535	0.00322586	0.0743331
Cyp2j5	5.92623	0.601576	0.170133	3.64785	0.000264445	0.011023
Trib1	128.262	0.600723	0.151148	3.97055	7.17e-05	0.0038854
Klf5	12.0816	0.600147	0.211313	2.82498	0.00472839	0.0984012
Cd300lf	140.67	0.599732	0.170506	3.51529	0.000439268	0.0167137
Nfam1	100.273	0.599452	0.194845	3.07033	0.00213825	0.0551914
Slc52a3	17.7419	0.599153	0.208023	2.92295	0.00346728	0.0774673
Rassf10	8.69399	0.598466	0.199612	3.01204	0.002595	0.063572
Cideb	9.69661	0.598389	0.203543	2.94922	0.00318578	0.073531
Plscr1	188.974	0.598061	0.129512	4.61462	3.94e-06	0.000366619
Npnt	36.8138	0.597288	0.200816	2.97271	0.00295187	0.0698643
Hk1	118.456	0.594968	0.171153	3.46993	0.000520586	0.0189803
Socs3	428.422	0.590323	0.13576	4.34597	1.39e-05	0.00100846
Il1rap	56.4665	0.590237	0.198925	2.95704	0.00310604	0.0719283
Tarm1	6.21053	0.586577	0.193584	3.08373	0.00204423	0.0536571
Phgdh	39.8805	0.585395	0.197531	2.96031	0.0030733	0.0712883
Cidea	4.70934	0.584975	0.178162	3.30906	0.000936114	0.0298802
Pik3ap1	101.988	0.584654	0.201094	2.9008	0.00372216	0.0823712
5730559C18Rik	54.5281	0.583884	0.180297	3.23496	0.00121661	0.0359932
Serpina1b	10.3891	0.583622	0.203707	2.89261	0.00382058	0.0840166
Serinc2	100.963	0.582197	0.202388	2.87391	0.00405426	0.0880462
St14	87.6986	0.581706	0.204474	2.83849	0.00453274	0.0951806
Abca3	140.649	0.580853	0.189331	3.06441	0.00218099	0.0558815
St3gal4	190.39	0.578622	0.144562	4.00015	6.33e-05	0.00352177
Lrrc26	8.13747	0.577811	0.183783	3.26732	0.00108573	0.0330189
Slc26a3	3.62618	0.577126	0.162336	4.19909	2.68e-05	0.00176517
Spata13	91.1256	0.574218	0.185083	3.10242	0.00191946	0.0509569
Itgam	450.19	0.573037	0.195881	2.92502	0.0034443	0.0770773
Dusp1	144.669	0.572806	0.166537	3.43983	0.00058209	0.0208418
Ccl20	4.8095	0.572067	0.171153	3.37604	0.00073536	0.0252299
Plet1	65.169	0.570404	0.183316	3.479	0.000503292	0.0184947
Sox9	41.5972	0.570338	0.198963	2.85907	0.00424883	0.0908553
Stfa2	3.23355	0.570125	0.161819	4.10241	4.09e-05	0.00252629
Cdk6	67.9391	0.569906	0.185023	3.07453	0.00210835	0.0546216
6430548M08Rik	59.7602	0.569417	0.170116	3.34115	0.000834314	0.0275024
Tnfrsf21	121.859	0.568699	0.185588	3.0627	0.00219346	0.0560981
Golm1	278.914	0.568213	0.136504	4.16117	3.17e-05	0.00202816
Trpv6	7.16289	0.567742	0.200394	2.84559	0.00443298	0.0934347
Abcc4	45.1999	0.563883	0.196418	2.86281	0.00419899	0.0899936
AI661453	42.5134	0.5614	0.195829	2.86465	0.00417464	0.0898223
Gys1	93.2149	0.560682	0.173963	3.21818	0.00129009	0.0376878
Dram1	248.312	0.559258	0.152348	3.66851	0.000243968	0.0104183
Hyou1	229.317	0.558723	0.160301	3.48214	0.000497428	0.0183274
Adgrl2	65.1363	0.549201	0.192938	2.83637	0.004563	0.0956723
Igtp	78.6495	0.54837	0.163182	3.354	0.000796537	0.0267164
1600014C10Rik	156.845	0.547159	0.155957	3.50864	0.000450398	0.0170443
Fmnl1	145.972	0.546576	0.170546	3.20232	0.00136327	0.0395774
Alas2	82.9558	0.544299	0.19523	2.93002	0.00338944	0.0768341
Znfx1	165.369	0.540744	0.146709	3.68298	0.00023052	0.0099458
Tnrc18	120.651	0.539491	0.179463	2.99994	0.0027003	0.0656916
Vsir	350.852	0.53879	0.178811	3.01151	0.00259951	0.063572
Usp18	107.094	0.538262	0.187254	2.8766	0.00401987	0.0874353
Clip2	96.2748	0.537792	0.175716	3.05451	0.0022543	0.0572197
Ly6e	905.015	0.536795	0.152032	3.53057	0.000414666	0.0159515
Ipcef1	4.20597	0.536734	0.180914	2.92219	0.00347581	0.0775338
Tnfrsf1b	196.937	0.532695	0.181737	2.92735	0.00341862	0.0768722
Lasp1	496.824	0.530109	0.139849	3.79001	0.000150643	0.00708277
Naip2	74.9999	0.528508	0.163372	3.2319	0.0012297	0.0361535
Myo6	63.9488	0.527089	0.172207	3.05728	0.00223355	0.0569996
Irgm1	248.513	0.525647	0.134891	3.89658	9.76e-05	0.00504565
F11r	291.656	0.52227	0.141393	3.69292	0.000221691	0.00964389
Col18a1	369.412	0.522188	0.155672	3.35355	0.000797819	0.0267164
Abr	233.793	0.521301	0.134822	3.8648	0.000111182	0.00554482
Selenbp1	112.034	0.52055	0.177977	2.92599	0.0034336	0.0769612
Smcr8	72.8999	0.520038	0.180588	2.87271	0.00406969	0.0881189
Npepps	152.32	0.519776	0.157623	3.29329	0.000990206	0.0309637
Csf1	276.681	0.518871	0.177048	2.92801	0.00341143	0.0768341
BC117090	2.99145	0.517271	0.15617	3.92124	8.81e-05	0.00465962
Pip5k1b	4.74274	0.51647	0.176876	2.96208	0.00305567	0.0712344
Tmem45a	283.192	0.510742	0.15436	3.30894	0.000936514	0.0298802
Sult1b1	3.62459	0.510216	0.160447	3.57477	0.000350529	0.0138663
Tm9sf4	97.5843	0.509165	0.177271	2.86676	0.00414691	0.0893633
Fcgbp	22.2023	0.507433	0.153581	5.16904	2.35e-07	3.5e-05
Junb	461.513	0.506728	0.110518	4.58503	4.54e-06	0.000408945
Slc16a3	237.483	0.503	0.171725	2.92805	0.00341092	0.0768341
Shisa5	392.439	0.502074	0.160612	3.12552	0.00177489	0.0477545
Smox	155.662	0.500735	0.160087	3.12687	0.00176681	0.0476288
Lypd6b	3.43365	0.495565	0.153446	3.96069	7.47e-05	0.00402919
Rhbdf2	136.072	0.494502	0.143939	3.43251	0.000598028	0.0213032
Csf2rb	247.665	0.493738	0.171871	2.87012	0.00410318	0.0885576
Furin	219.401	0.492493	0.163319	3.01329	0.00258429	0.0634385
Ecm1	496.849	0.488992	0.156783	3.11857	0.00181729	0.0488012
Parp14	215.748	0.488179	0.131966	3.69827	0.000217072	0.00950219
Rbm24	5.03672	0.487495	0.164105	3.22972	0.00123913	0.0363512
Ptprh	3.82074	0.48735	0.16531	2.93785	0.00330498	0.0757813
Lair1	136.536	0.484007	0.167733	2.88521	0.00391152	0.0854781
Diaph1	170.13	0.48224	0.130619	3.68992	0.000224329	0.00972835
Aph1a	142.109	0.481987	0.157539	3.05683	0.00223688	0.0569996
Tubb4b	388.828	0.481661	0.119531	4.02969	5.58e-05	0.00320939
Ano7	5.89404	0.479941	0.171042	3.008	0.00262975	0.0641989
Cd44	663.868	0.479442	0.160186	2.99233	0.00276856	0.067002
Oasl2	341.995	0.479006	0.136775	3.50219	0.000461451	0.0172819
Hsph1	121.887	0.477912	0.163806	2.91722	0.00353169	0.0786537
Pfkl	288.876	0.474911	0.149456	3.17678	0.00148918	0.0422662
Plxnb2	542.803	0.474191	0.167914	2.82309	0.00475626	0.0986871
Col5a1	1327.73	0.473167	0.162205	2.91672	0.00353728	0.0786537
Agr2	7.87789	0.472299	0.178911	2.85763	0.0042682	0.0908553
Agt	8.56111	0.471936	0.176626	2.87976	0.00397975	0.0868332
Gpa33	4.27852	0.471306	0.163351	3.0379	0.00238232	0.0596177
Akr1c19	3.25893	0.469287	0.164126	2.83932	0.00452103	0.0950779
Il4ra	788.96	0.469262	0.153913	3.04806	0.00230324	0.0579503
Tmbim6	812.178	0.468064	0.141999	3.2959	0.000981078	0.030786
Psen1	124.695	0.467309	0.157685	2.96086	0.00306785	0.0712803
Ccdc88b	108.05	0.465034	0.145556	3.19401	0.0014031	0.0403976
S100g	2.87727	0.460241	0.149362	3.74246	0.000182228	0.00828872
Ddx58	118.726	0.456505	0.155794	2.92925	0.00339776	0.0768341
Hspa8	3368.71	0.44922	0.111251	4.03791	5.39e-05	0.00311185
Shh	2.81752	0.448498	0.156397	2.93833	0.00329984	0.0757813
Btg2	160.189	0.447846	0.137092	3.26506	0.00109441	0.0331022
Mgat4a	156.076	0.446662	0.150451	2.96651	0.00301205	0.0708086
Cyp2d10	2.88876	0.445296	0.147437	3.70363	0.000212533	0.00938599
Cdkn1a	316.716	0.435819	0.148959	2.92662	0.0034267	0.0769301
Midn	151.146	0.433853	0.148038	2.9287	0.00340384	0.0768341
Ifitm3	952.616	0.423694	0.117615	3.60221	0.000315526	0.012661
Teddm3	3.56873	0.419696	0.143824	3.78032	0.000156628	0.0072905
Gsta2	3.52849	0.412392	0.154289	2.93904	0.0032923	0.0757393
Xbp1	670.814	0.408733	0.118925	3.43684	0.000588534	0.0210186
Tgfbi	1184.42	0.403478	0.141534	2.85074	0.00436178	0.0922335
Mcpt4	3.09459	0.401415	0.14461	3.20737	0.00133954	0.0390398
Gfpt1	177.433	0.390761	0.13477	2.89842	0.00375045	0.0828659
Rcc2	226.384	0.388907	0.13085	2.97128	0.00296561	0.0700706
Alpi	3.27367	0.380593	0.138415	3.59329	0.000326525	0.0129903
Ces2b	2.1483	0.365311	0.136482	3.2483	0.00116096	0.0347143
Psapl1	3.08316	0.349318	0.133737	3.44187	0.000577718	0.0207384
Ern2	2.84224	0.342003	0.132623	3.36259	0.000772141	0.026234
Ngp	27.8404	0.326147	0.132247	4.01891	5.85e-05	0.00334602
Ms4a3	2.03299	0.298629	0.12549	2.98173	0.00286621	0.0685338

## Sheet: Human ranked TP63 vs empty
Gene_ID	LOG2FC
SPRR3	11.5051
KRT14	11.3545
C10orf99	10.7837
KRT6A	10.2165
SPRR1A	9.76072
FST	9.36905
SPRR1B	9.31355
MIR205HG	8.99965
KRT17	8.85496
SPRR4	8.62407
TP63	8.51592
KRT13	8.15159
PKP1	7.82268
CRCT1	7.78765
SERPINB2	7.66638
GIMAP8	7.46572
ZNF750	7.33297
DSG3	7.24268
KRT5	7.05944
GGT6	7.02174
A2ML1	7.01443
FAT2	6.89505
IL36RN	6.57859
S100A9	6.49192
S100A2	6.4275
RNASE7	6.16681
SLIT1	6.12194
HES2	6.11756
BDKRB2	5.9867
TRIM29	5.88618
ANKRD65	5.84298
PLA2G4E	5.83341
S100A8	5.80512
LCE3D	5.77328
ANXA8L1	5.71359
FEZ1	5.68108
COL4A6	5.66794
IL1B	5.66197
LCE3E	5.58628
KRT6B	5.47316
MTSS1	5.42188
RHCG	5.38283
AKR1C2	5.3667
INPP5D	5.35997
SPRR2D	5.35945
MFAP5	5.35772
SERPINE1	5.25316
CFH	5.1825
BDKRB1	5.1003
NFASC	5.09264
KRT16	5.0797
KLK7	5.0647
PXDN	5.03842
C14orf132	5.00958
SPRR2A	4.97496
HOPX	4.97483
RPTN	4.95951
SLC37A2	4.92054
CASP1	4.89379
RDH12	4.81142
CXCL14	4.74815
COL4A5	4.74344
SPRR2E	4.73281
CSTA	4.72906
LOC105373985	4.70046
DQX1	4.67058
EPHB3	4.64651
IL36G	4.64571
RLBP1	4.62292
TNNT3	4.62059
GPR153	4.61996
SHC4	4.60432
GJA1	4.59693
RAET1G	4.59353
CRNN	4.57113
ECM1	4.56957
FBLN1	4.53189
GRM5	4.52758
MMP10	4.52465
APCDD1L	4.48458
ASPRV1	4.41417
IL33	4.3895
TACR2	4.34154
TMEM40	4.32858
GUCA2B	4.31802
KPRP	4.31793
RGS16	4.30896
IL1RN	4.29846
FAM212A	4.20641
TGM3	4.19884
ALOX15B	4.19453
MUC17	4.1318
C12orf54	4.10053
SLC2A9	4.09673
DENND2C	4.07258
IRF6	4.06352
LSP1	4.0567
PALMD	4.03452
LUZP2	3.99183
OLFM4	3.981
AKR1B10	3.97834
HOTS	3.96561
SEMA3F	3.94912
IL36B	3.90087
PPP2R2B	3.8827
CLEC4E	3.87505
MACROD2	3.87478
PRDM1	3.87419
ADGRF4	3.85277
UGT1A6	3.8441
KRT6C	3.84243
SBSN	3.81823
SEMA4A	3.80484
RAB7B	3.78511
ANKUB1	3.75443
PI3	3.74543
HTR7	3.73846
NECTIN1	3.73212
HCAR3	3.72536
NECTIN4	3.6851
CALML3	3.67811
PDGFRA	3.6762
NPBWR1	3.59951
PGBD5	3.57307
CDH3	3.55671
PLEKHH2	3.55502
KCTD12	3.55488
AKR1C1	3.55352
KRT20	3.53305
LCE1E	3.5262
RCSD1	3.51708
IL13RA2	3.51497
CHST2	3.51453
MUC2	3.50464
KLK12	3.50316
DAPL1	3.49407
CDC42EP5	3.47139
GRHL3	3.4603
SLC44A5	3.45951
LOC105375809	3.41245
LPAR3	3.4031
ASPG	3.40126
KRT78	3.3917
STARD5	3.37759
C15orf48	3.37166
PTGS2	3.36735
ANXA8	3.36533
RHOV	3.36196
HCAR2	3.36138
CD200	3.36064
LEFTY1	3.3481
SRGAP3	3.33999
DNAJB13	3.31425
WNT9A	3.31383
TMEM27	3.29671
KRT4	3.29068
KLK13	3.28736
MUC16	3.24374
LOC107987276	3.23316
BATF2	3.22919
PHLDA3	3.22293
C1orf186	3.20418
CA2	3.19778
MMP28	3.19766
SLPI	3.1886
IL1A	3.17221
LOC100653061	3.17144
LOC100505650	3.16225
LCE1F	3.15594
IL16	3.14947
SNCG	3.11943
MAF	3.10466
ADAMTS8	3.07939
SLC1A3	3.07539
SYNPO2L	3.06453
TMEM45A	3.06114
BARX2	3.05701
ROS1	3.05657
SPOCK3	3.0482
CEBPA	3.03363
SLC40A1	3.02885
TRAF3IP3	3.02657
STXBP6	3.02601
TENM2	3.01703
MARK1	3.0118
DMBT1	3.00965
SRRM3	2.99351
ZNF385A	2.99106
VANGL2	2.98645
IHH	2.98107
ARTN	2.97314
LIPK	2.96362
GRHL1	2.95652
CRP	2.95261
KLHDC7B	2.9479
PTHLH	2.9377
RAET1E	2.9295
KRT23	2.92554
ARHGAP23	2.91563
C1orf74	2.90599
TMCC3	2.90499
ADAMTSL4	2.9044
IL20RB	2.90289
ACE2	2.89868
TRIM63	2.89025
MUC20	2.88474
SOX6	2.88291
VTCN1	2.87301
COL4A1	2.8695
THEMIS2	2.86778
ADGRF2	2.86601
INSC	2.8516
TGM1	2.83648
FUT3	2.82308
RNF152	2.79188
SDR9C7	2.78554
KRT34	2.77728
PLA2G4F	2.76468
KRTDAP	2.76121
AQP3	2.75783
CXCR2	2.75259
OVOL1	2.75057
B3GNT7	2.74354
NCALD	2.73899
TLL1	2.7248
UCP2	2.72117
SETBP1	2.72098
MAOA	2.71252
SH3TC1	2.71076
APOBEC3A	2.70914
KLK6	2.69329
WFDC5	2.68836
CHCHD10	2.67804
UGT1A1	2.67634
SLC6A14	2.66307
CYS1	2.66217
GCNT3	2.65445
STEAP4	2.65117
LAPTM5	2.64404
ZPLD1	2.6428
CA12	2.63452
KRT32	2.63181
CLCA4	2.61416
KIAA1324	2.60912
B3GALT2	2.608
CALD1	2.60355
ATP6V0A4	2.59596
SCGB1A1	2.59585
CWH43	2.58506
DSE	2.57281
FAM3D	2.56005
MME	2.5599
KLK8	2.54304
SLC39A2	2.54199
FER1L6	2.51347
KRT79	2.50892
SPTSSB	2.50643
KRT9	2.48759
RSAD2	2.48602
SPATA18	2.48153
PLCB1	2.48118
SLC7A8	2.4727
GPR87	2.47142
IL1F10	2.46978
LRP4	2.46272
PADI1	2.46064
SOX7	2.45999
JAG2	2.45982
ZNF365	2.43709
TTC9	2.43403
GAL3ST4	2.4335
IRF5	2.4248
ABCG1	2.42162
USH1G	2.42119
TP53AIP1	2.41263
DMRT2	2.40344
CFB	2.40019
DFNA5	2.39399
LOC105369914	2.38809
CCR6	2.3867
HEG1	2.38619
PSTPIP2	2.38438
DHRS13	2.3837
LGALS7	2.37635
ARHGAP40	2.36617
VSNL1	2.35972
PPBP	2.35901
FGD2	2.35511
SEMA5A	2.35359
AGMO	2.34954
SOGA3	2.34474
P2RY1	2.34156
CXCL17	2.33969
TMEM154	2.32367
ABCA12	2.32111
MICALCL	2.31652
UGT1A10	2.31447
FAM150A	2.29653
LAMP3	2.29247
CNTNAP2	2.28673
VWF	2.28074
PTH1R	2.27731
SLC2A5	2.27658
SLC24A3	2.27574
DUSP7	2.27559
COL5A3	2.26648
FXYD3	2.26422
SPINK7	2.25976
MICALL1	2.2584
ASB2	2.25779
GJB6	2.2562
SLC10A2	2.24987
CMPK2	2.24775
DHRS9	2.24498
OAS2	2.24439
HECW2	2.24261
ARL4D	2.24039
LCE1A	2.24026
LGALS7B	2.23812
UPK2	2.23789
C16orf54	2.23439
SULT1E1	2.23096
MGARP	2.22643
GPC1	2.22168
KLK5	2.21555
COL12A1	2.21479
POU3F1	2.20588
TYMP	2.20528
TMEM221	2.20288
CLDN23	2.18814
IRAK3	2.17773
KLK9	2.17354
NEURL1	2.17279
EMX1	2.17204
KCNE3	2.17078
ITIH5	2.16816
NSG1	2.16483
CRABP2	2.16371
CLDN4	2.16086
CERS3	2.1585
NUAK2	2.15671
LCE1C	2.15018
PGLYRP3	2.14706
METRNL	2.14492
SH3BP1	2.1431
MMP9	2.13053
TM4SF20	2.13005
RGS4	2.1293
GSDMC	2.12921
RDH13	2.12818
LY6G5C	2.12754
AICDA	2.12123
SLC26A9	2.12057
STOM	2.11931
ADAD2	2.11511
SERPINB3	2.11511
C22orf23	2.10885
CRYAB	2.10616
SMOC1	2.09611
CAPN6	2.09557
DSC3	2.09511
FBXO39	2.09178
MUC4	2.08762
MX1	2.0859
COLCA2	2.0849
NOTCH3	2.07642
PLAT	2.07487
TRABD2B	2.07258
C3orf70	2.06979
LOC101928635	2.06907
GLUL	2.06609
NELFE	2.0626
ALDH3B2	2.06007
HR	2.05952
HLA-DQB1	2.05311
C1orf68	2.05079
S100A12	2.04412
MMP12	2.02774
FGFR3	2.01734
ITM2B	2.00892
LY6D	2.00673
FGL2	2.00271
SFN	2.00044
AQP10	1.99052
LOC101060389	1.98794
MYH11	1.98785
SH3PXD2A	1.98692
CAMK2B	1.98476
GABBR1	1.98438
COL7A1	1.97868
FRMPD2	1.97746
PROM2	1.97567
NWD2	1.97167
SLFN12L	1.9703
CACNB4	1.96165
MAGED4	1.95979
BMPER	1.95859
AKR1C3	1.95315
HS6ST1	1.94629
RASD2	1.9418
SPRR2G	1.93824
MMP14	1.93204
TMEM86A	1.92927
LOC102725009	1.92923
OR4C6	1.92811
GIMAP7	1.92522
KRT1	1.92274
POU2AF1	1.92274
CRLF2	1.92196
CPQ	1.92111
UBR7	1.91812
RNF144B	1.91602
NEB	1.90876
KREMEN1	1.90768
SYNPO	1.9051
NEFL	1.90278
EHMT2	1.90014
B3GNT8	1.89537
FUT6	1.89347
ARHGAP25	1.88953
CTSH	1.8872
BTG2	1.87762
MMP1	1.87687
KCNK15	1.87295
NCF1	1.8688
IFI27L2	1.86871
SLC2A12	1.86533
COL27A1	1.86511
FGFBP1	1.86509
EFNA1	1.85899
S1PR5	1.85685
ASB12	1.85619
NMRAL1	1.85367
TNFSF11	1.85358
SHROOM4	1.85125
SAMD9	1.84895
KIAA1324L	1.84813
RAP2B	1.84481
HAS3	1.84423
CCL5	1.8421
SOWAHD	1.84095
SULT2B1	1.84078
PIM1	1.83671
CTSE	1.82344
SPINK1	1.82269
KLK10	1.82171
SPARC	1.81643
RAB11FIP1	1.81242
TMPRSS4	1.81198
TREH	1.80566
THBS1	1.8045
BAAT	1.80354
NXN	1.80076
HSPB1	1.80014
RNF225	1.79985
GM2A	1.79955
HUNK	1.79803
LCP1	1.79096
WFDC12	1.78964
SNN	1.78944
S100A14	1.78821
PRAP1	1.78407
GYLTL1B	1.78258
ADGRG7	1.77976
LOC107984208	1.77677
C17orf50	1.77672
ZFP92	1.77571
DKK4	1.77391
CAPN11	1.77198
KPNA7	1.76815
MREG	1.76606
A4GALT	1.76205
RNF186	1.75742
WNT5A	1.75622
MYO1B	1.75594
PLA2G4A	1.75571
CCSER1	1.75448
VARS	1.75293
CEACAM18	1.75289
SYT14	1.75001
HAP1	1.7486
SAA1	1.74815
TNFAIP6	1.74715
PLEKHG5	1.74275
S100P	1.74024
SERPING1	1.73909
GPR176	1.73634
FAM25A	1.73469
GJB5	1.7331
MRGPRX3	1.73096
CXorf49B	1.72828
CLEC17A	1.72427
MEIS3	1.7219
LOC107986217	1.72065
RNF222	1.7195
KCNV2	1.71921
APOBEC3G	1.71729
TRIM22	1.71681
GAS2L2	1.71483
P2RX6	1.71373
RIMBP3	1.70738
PPL	1.70008
VGLL1	1.69924
CUX2	1.69715
GPX2	1.69708
INTS3	1.69209
LRP1	1.69026
CCDC3	1.6879
DUOX1	1.68641
NDE1	1.68508
GUCY1A3	1.67736
DLL4	1.67624
KLHL13	1.67535
FAM53B	1.67359
PCDHGC3	1.66971
FAM84A	1.66272
ABAT	1.66248
CPE	1.66237
KCTD15	1.65854
ATP23	1.65801
FOXC1	1.65532
CLDN1	1.65363
ARHGEF37	1.65312
GUCY2D	1.65147
JUP	1.64803
IFI27L1	1.64757
PAOX	1.64531
RAB38	1.64373
GPR27	1.64195
MGP	1.64148
DYSF	1.64122
CTSV	1.63694
C22orf15	1.6341
BST1	1.63359
TLE4	1.6286
SLC6A8	1.6283
PLXNA1	1.62396
ALDH3A1	1.62385
BCAS4	1.62354
AK8	1.61969
KRT222	1.61927
ATP10D	1.61693
TEX35	1.61587
RND1	1.61333
IFI44L	1.6131
NKD2	1.61017
SKIV2L	1.60795
LY6K	1.60739
TMEM253	1.60613
DLL1	1.60592
ZNF219	1.60331
LYPD3	1.60022
LRRC32	1.59399
UCN2	1.5932
LMO7DN	1.59096
CISH	1.58901
TACSTD2	1.58686
DSP	1.58443
LOC105376714	1.58293
TNNT2	1.57124
RIMKLB	1.57112
GUCY1B3	1.56991
IPCEF1	1.56872
DUOXA1	1.56271
CLDN16	1.56118
F2RL1	1.55756
NPY4R	1.55337
MDGA1	1.55056
ATG9B	1.54855
MXD1	1.54819
NIPAL4	1.54407
FGF1	1.54406
MYCL	1.53891
SLC39A7	1.5384
GRID1	1.5379
TP53INP2	1.53686
IL7R	1.53574
SAMD9L	1.53562
NMUR2	1.53471
HMGCS2	1.5345
PRR5L	1.52813
HCAR1	1.52442
TMPRSS11D	1.52289
LRRC8A	1.52185
SNCAIP	1.51525
SLC52A1	1.51304
ST6GALNAC2	1.51288
ARSI	1.50945
DACH1	1.50878
NHSL2	1.50674
HSD11B1	1.50454
AREG	1.49946
CLCF1	1.49593
UGT1A8	1.49536
NDST1	1.49445
GPR78	1.49237
AGT	1.49177
PELI1	1.48942
GBP4	1.48717
TUBAL3	1.48657
ADAM28	1.4854
ATP13A4	1.48407
ARHGAP30	1.48109
EFNB1	1.47975
ADGRF1	1.47938
SLC5A1	1.47762
SNX18	1.47573
LPAR6	1.47235
COL14A1	1.47169
FAM25C	1.46838
NOMO3	1.46832
PLA2G4D	1.46771
PHLDB2	1.4673
GPR157	1.46611
FRMD6	1.4652
KCNH8	1.46165
SNAI2	1.46113
LGALS9	1.45996
MCC	1.45874
KRT15	1.45742
IL1RAPL2	1.45564
MFSD2A	1.45447
CELSR2	1.45383
HERC6	1.45383
RASGEF1B	1.44975
HABP2	1.44974
RNASET2	1.44715
LPAR1	1.44629
SDC1	1.44514
LOC105378230	1.44434
NOS3	1.44394
ITGAM	1.44385
ABCG8	1.44375
SHF	1.44296
SDCCAG8	1.44198
FAM83F	1.43792
EVI2B	1.43721
OAS3	1.43369
LMO2	1.43141
C20orf197	1.43088
SOCS1	1.43029
NUDT11	1.43029
KLK11	1.42812
LYNX1	1.4263
EFEMP1	1.4262
ALPK3	1.42392
C2orf54	1.42256
ATP1A3	1.42168
NXPH4	1.42161
CYP4F11	1.42099
HOMER2	1.42084
PTPN13	1.41911
LAD1	1.41729
CHAC1	1.41619
PLAUR	1.41608
SDCBP2	1.40869
GDF15	1.4086
PTGES	1.40832
MIP	1.40324
MN1	1.40094
LYPD5	1.40046
TMEM50B	1.40026
COLCA1	1.40008
TOM1L2	1.39935
CDKL5	1.39895
GSDMD	1.395
BCAT1	1.39239
OTUB2	1.39061
PSCA	1.38533
ASS1	1.38324
SLC16A9	1.38048
SEMG1	1.37913
SERINC2	1.37759
MT1H	1.37501
DUSP9	1.37405
TMPRSS2	1.37314
GAS6	1.36962
SOWAHB	1.36897
GPR161	1.36757
LHX9	1.36393
PAEP	1.36261
ANXA10	1.36076
RTP4	1.36021
FLOT2	1.35727
RRAD	1.3572
EPS8L1	1.35654
DCUN1D3	1.35521
SLC36A1	1.35368
CELSR1	1.35075
PSMB9	1.34969
SLC7A5	1.349
GJC3	1.34813
MCTP2	1.34797
FHL1	1.34778
ACER2	1.3466
EN1	1.34593
EDARADD	1.34362
TMEM98	1.34321
IFI6	1.33915
CITED1	1.3381
APOM	1.33688
DNAH3	1.33646
CYP4F3	1.33319
TNFSF10	1.33051
ITPKC	1.32861
STON2	1.32754
LOC107987042	1.32732
CCL15	1.32637
OASL	1.32574
EXOC6B	1.32568
IFI16	1.32148
HLA-E	1.32066
SRPX2	1.32056
SERPINF1	1.31885
LURAP1L	1.31861
VAMP7	1.31366
PPFIBP2	1.30937
PARM1	1.30921
PC	1.30899
EPN3	1.30631
FSCN1	1.30571
LHFP	1.30443
MATN2	1.30435
XYLT1	1.30192
HTR3C	1.29881
C2orf88	1.29786
LRFN1	1.29671
MT1X	1.29295
AJUBA	1.28859
UBE2L6	1.28717
HAS1	1.2838
IER5	1.28377
S1PR4	1.28218
TTC39A	1.27751
CCDC69	1.27711
SEC14L5	1.27576
ALG1L	1.27251
SYT7	1.2702
PCYT1B	1.26999
TMPRSS3	1.26876
HLA-B	1.26698
IGFL1	1.26488
FGF12	1.26299
CSTB	1.26197
PCDHB11	1.26069
PCDHGA9	1.26013
FAM124A	1.25393
WFDC2	1.25227
PCDH10	1.24878
NKX2-8	1.24824
CAPS	1.24405
HGD	1.24313
RAB42	1.2431
PLXNA2	1.24273
AMOTL1	1.24117
IFIT1	1.24084
C3orf67	1.24028
PLLP	1.23848
GLI3	1.23819
SVEP1	1.23672
EVPLL	1.23095
C1orf116	1.23006
LSR	1.22816
LRAT	1.22562
BAG3	1.22245
SLC15A3	1.22243
KLF8	1.22096
TNFRSF21	1.21953
PCDHGA1	1.21719
LRIG3	1.21646
RAET1L	1.21355
RAG1	1.20892
HLA-G	1.20802
KCNS1	1.20745
C3	1.20159
XKRX	1.20151
NDRG2	1.19994
MEF2A	1.19892
PPARD	1.19703
OR1J2	1.19524
TMEM173	1.19474
GGT2	1.19384
ADRB2	1.1938
SLC35D3	1.19276
THRB	1.19246
MMP13	1.19153
KCNG1	1.19048
ANO3	1.19011
CDC42EP1	1.18971
FAM83A	1.18907
HBEGF	1.18844
TIGD5	1.18803
PI4K2A	1.18673
C15orf62	1.18669
SIRPB1	1.18479
PDE6A	1.18414
MT1M	1.18392
SRC	1.18345
SSH1	1.1816
LPCAT2	1.18006
GINS3	1.17968
FOSL2	1.17946
CX3CL1	1.17796
EPAS1	1.17661
LMTK2	1.1762
PTPRU	1.17483
SERPINB7	1.173
GNE	1.17297
TCN1	1.17263
PPP4R4	1.17162
CTSS	1.1712
UST	1.17024
MT1F	1.16888
PANK4	1.16793
ABCF1	1.16731
UGT2B7	1.16572
S1PR2	1.16518
IL1RAP	1.16479
LIN28B	1.16212
SOD3	1.16083
FAM222A	1.15971
FUT4	1.15728
PGC	1.15677
UNC5B	1.15276
TEX15	1.15081
PPP1R13L	1.14848
IFIT3	1.1459
RBBP8NL	1.14348
RAB9B	1.14268
APLN	1.14084
HOMEZ	1.13992
TRPV4	1.13492
PLCG2	1.13364
C6orf132	1.1282
ANK3	1.12762
RAB3D	1.12682
RND3	1.12559
CDH1	1.12348
TMEM255A	1.12224
ARHGEF4	1.12147
DOCK10	1.12136
TRIM15	1.12127
MYO10	1.11853
CBX6	1.1183
GGNBP2	1.1153
MED12L	1.1144
LOC105372412	1.11409
GJB4	1.11317
NHLRC1	1.11209
NOV	1.11059
PRSS8	1.1103
KLF12	1.11001
CATSPERB	1.10862
SLC9A1	1.10653
COL23A1	1.10574
INHBA	1.10433
MPP7	1.10343
ZNF185	1.10107
MAPK8IP2	1.10099
GNA15	1.0974
RNF165	1.09737
THSD1	1.09669
NECTIN2	1.09623
PPP1R14C	1.09388
PITX1	1.09388
FBXL18	1.09361
ANKK1	1.09284
ZNF362	1.09283
C1QL4	1.09205
SLC7A4	1.09012
PORCN	1.08811
NDRG4	1.08651
DUOX2	1.08151
KLF7	1.08123
CD82	1.0812
USP28	1.07969
ITGA1	1.07852
CSGALNACT1	1.07752
LOC107984638	1.07721
CXCL8	1.07671
KLHL6	1.07577
FAM210B	1.07533
IFNLR1	1.0746
ABCG5	1.07444
MAP7D2	1.07153
MAP3K9	1.07105
RRBP1	1.07056
ERC1	1.06853
DLK2	1.06746
PDE10A	1.06715
WNK2	1.06597
DAB2IP	1.06584
HELZ2	1.06465
ARRDC2	1.06388
PLAC4	1.06314
ZNF704	1.06116
ANPEP	1.05952
NCCRP1	1.05951
APOBEC3C	1.05929
TM4SF19	1.05862
IFFO2	1.05537
DHRS3	1.05445
CACHD1	1.05409
C6orf222	1.05248
TMEM171	1.05191
LOC107984355	1.05145
TICAM1	1.04634
ETS2	1.04528
PRR3	1.04399
FAM25G	1.04276
RCBTB2	1.04204
BLCAP	1.0413
PCDHGA4	1.03957
PCDH1	1.03887
ACKR4	1.03759
ICOSLG	1.03632
STAT4	1.03564
CORO2A	1.03439
USP18	1.0342
CLN8	1.03254
CKMT1B	1.03162
TANC2	1.03005
SLC17A4	1.0293
ITPR2	1.02902
TTBK2	1.02733
HEY2	1.0271
MT2A	1.02595
FXYD1	1.02551
CARD10	1.02421
HSPB8	1.02319
LIN7A	1.02311
GNG11	1.02211
FAM60A	1.02113
CELA2B	1.01983
DDI2	1.01962
SLC47A2	1.01957
TRIM26	1.01944
CLDN7	1.01904
MAST4	1.01899
APLP2	1.01822
TLR2	1.01765
ABHD4	1.0169
FAM171B	1.01597
RFX5	1.01417
NUDT10	1.01241
C10orf55	1.01203
FAM160A1	1.0094
MESP2	1.00906
FXYD7	1.00884
ABO	1.00809
CTSC	1.0075
AKR1C4	1.0074
MRAS	1.00591
DTX1	1.0056
XDH	1.00547
IFITM3	1.00545
GAREM2	1.00459
OAS1	1.00377
CDK5R2	1.00366
TYRO3	1.00343
SPATS2	1.00288
USP6NL	1.00288
CEACAM1	1.00136
PHEX	1.00121
PPARGC1B	1.00067
LSM14A	1.00045
NPL	0.998884
AVPR1B	0.9987
PXDNL	0.998362
SCN4B	0.997609
WBSCR28	0.997089
TBL1X	0.996914
KCTD11	0.99681
TSKU	0.996122
ZBTB42	0.994374
GPR68	0.993655
ABCC5	0.993583
ADAM19	0.993373
WNT7A	0.99311
TECTA	0.992882
PACSIN3	0.992094
C1QTNF9B	0.990806
LOC390877	0.990074
TUBB6	0.988107
CD79A	0.987535
WNT10B	0.986771
CDR2L	0.985819
DDT	0.984564
LNPEP	0.983491
MR1	0.983348
SLC27A4	0.982944
LOC107986762	0.982704
DUSP16	0.982475
SLC26A7	0.981072
PRKCH	0.980344
EGR4	0.978993
FXYD5	0.977715
LOC107985184	0.976794
HIST1H2BE	0.975733
ADAMTS9	0.974712
ARHGEF40	0.974563
SDPR	0.974382
CTSL	0.973308
SYNPO2	0.972568
NGFR	0.972555
CSRP2	0.971282
KCNN3	0.970672
TSPAN9	0.970365
PALM	0.970344
AIM1L	0.968484
VSIG10L	0.967929
EXT1	0.967369
TMPRSS13	0.967136
GPER1	0.965391
RAB33A	0.962395
DOK7	0.962174
IFITM1	0.961335
SUSD6	0.960435
FEM1B	0.96036
CYP4F2	0.960164
PLXNB3	0.960055
SYPL2	0.959523
SPHK1	0.9579
ELF4	0.957138
RRN3	0.955202
PCDHB15	0.952656
SIRPB2	0.951498
RAB15	0.950444
RILPL1	0.948587
CDKN1A	0.948145
AP5B1	0.946965
DUSP5	0.944315
ANXA2R	0.943937
HMOX1	0.940882
SLC20A2	0.939661
TNIP3	0.937981
KLC3	0.937203
TNFRSF19	0.936612
F11R	0.935436
WISP3	0.934654
APBA1	0.933469
HIGD1B	0.932367
USP11	0.931894
LRRC31	0.931636
LOC105378577	0.929765
PTAFR	0.929426
UPK3A	0.927481
ERMARD	0.925582
LITAF	0.925014
APOBEC3D	0.923981
MDM2	0.923837
IL4R	0.923773
TTLL11	0.922726
KCNG3	0.922364
STX6	0.921011
HAL	0.919965
LRFN3	0.919254
GXYLT2	0.918456
GTPBP6	0.917904
ENPP1	0.917104
LOC283278	0.91699
TCF7L1	0.916253
C1orf21	0.91589
CARD16	0.913194
PCDHGA10	0.912727
BCL7A	0.911565
UNC5A	0.911548
LAMA4	0.91154
MOB3B	0.911304
LYPD6	0.91121
PLAU	0.909407
TINAGL1	0.908165
ODF3L1	0.907474
ACTA2	0.906309
IFI35	0.906276
DDX60	0.90582
MPP2	0.905212
ZAK	0.904156
TBC1D3	0.902899
APOBEC3B	0.902843
TP73	0.902678
CHST6	0.901724
C11orf96	0.901554
GANC	0.901296
LOC105378148	0.897771
KBTBD7	0.897671
ISG20	0.89761
PLEKHN1	0.897498
RARG	0.897477
NTN1	0.89744
LANCL3	0.897117
PPP1R3C	0.896802
TGFA	0.896408
LOC102723996	0.896374
TTYH1	0.895255
ZMIZ1	0.894743
HPGD	0.894499
WDR46	0.894497
SPINT1	0.892903
KBTBD6	0.891297
OLFM2	0.890959
LIPH	0.889721
CLDN3	0.888205
ABCA1	0.886341
EGLN3	0.885614
ABCB4	0.885461
NEO1	0.885364
P2RY2	0.88535
KIAA0930	0.885307
FAM213A	0.884311
MLIP	0.883608
MPZL2	0.882735
SCPEP1	0.882541
LUZP1	0.882501
CD109	0.881999
ANGPTL4	0.881339
LOC107985246	0.880896
AMER1	0.880802
TP53INP1	0.880563
PCDHGB6	0.880137
MYRIP	0.879438
VMAC	0.878764
FAM69A	0.877895
TBC1D2	0.876964
CHRM3	0.876799
LOC105370378	0.874445
SH3RF2	0.87392
NATD1	0.873694
IGSF3	0.872692
AMIGO1	0.872053
BHLHE40	0.872036
KRTAP5-9	0.870326
GATSL2	0.869448
RHOBTB1	0.869013
PHF11	0.868321
TTPA	0.868317
FZD7	0.866289
AKIRIN2	0.865325
NCOA3	0.865155
PLEKHA7	0.864865
NAALADL1	0.863949
IRF2	0.863886
LOC100505549	0.863439
REP15	0.863375
STEAP1B	0.862324
CMIP	0.861603
SIGLEC15	0.861291
IGSF22	0.860968
ERCC1	0.860167
CRK	0.859034
IFI44	0.858834
IFIH1	0.85656
TEAD3	0.855632
SCNM1	0.854652
PRPF8	0.854286
LOC101928917	0.852998
LOC107984124	0.852053
SPP1	0.851059
GNAI1	0.850524
SNX9	0.850338
KIAA0430	0.849592
TOLLIP	0.849267
HRASLS2	0.848613
RGAG4	0.847103
TCAF2	0.846896
SHROOM2	0.846052
CAPN1	0.845284
PPME1	0.844804
GGT1	0.844689
MKX	0.843335
GPR83	0.843135
XAF1	0.842824
MGAT5	0.841242
FNTB	0.839328
ZNF770	0.83766
CES2	0.837472
ST14	0.835656
RGS12	0.834325
FHDC1	0.833979
ZDHHC18	0.833746
CPNE2	0.832718
N4BP1	0.832456
UNC13D	0.83245
CGN	0.831324
KANK1	0.829774
PAQR9	0.829499
NET1	0.829258
MYO1E	0.829231
BAMBI	0.828851
CKAP4	0.828611
PRSS22	0.827792
SPINK5	0.827218
FAM155B	0.826489
UBE2H	0.823507
SYNGR1	0.823256
MATN3	0.822519
TAP1	0.821773
RAPGEFL1	0.821402
JARID2	0.821141
CXCL11	0.821033
FAM131B	0.821019
KAT2B	0.819301
NKX3-1	0.819247
TMEM189	0.81878
ALDH1A3	0.818745
ADPRH	0.818532
FRMD8	0.81853
LOC102724422	0.816074
TRIM38	0.815974
GPC3	0.815672
CDH2	0.815302
MDFI	0.814997
TBC1D30	0.813304
RBFOX2	0.812127
HERC5	0.809148
S100A11	0.809115
ARID5B	0.809011
C6orf106	0.808961
GAMT	0.80714
GALNT5	0.806807
IGF1R	0.806784
PRRX2	0.806567
LRRK1	0.806136
GIMAP2	0.805501
MTMR8	0.804473
GPR132	0.803918
NAPRT	0.803824
DIP2B	0.802657
FOXO3	0.801643
FRMD4A	0.800857
CLSTN1	0.800753
ATP1B3	0.799802
GALNT14	0.799672
STK32A	0.799539
LOC105369728	0.799146
DERL3	0.79903
TUBA4A	0.798611
SLFN5	0.798189
RYR2	0.798093
PLEKHM1	0.797969
IL12A	0.797713
LIPG	0.797546
GAL	0.797156
CSRP1	0.797086
HES1	0.796758
KSR1	0.796175
TRANK1	0.7955
ACADL	0.795191
PDE4D	0.794867
EDAR	0.794553
TMEM63B	0.794101
CYP1B1	0.794018
PKNOX2	0.793815
AKT3	0.793064
CNTF	0.792318
SAA2	0.791264
FJX1	0.791094
CSK	0.789267
RIMBP3B	0.789065
IL18R1	0.788904
LRRC41	0.788635
PPP1R10	0.787605
SPSB1	0.787249
DEF6	0.787075
TCP11L1	0.787061
BACE2	0.786709
TPST2	0.785385
LOC102724334	0.785088
MITF	0.784416
P4HA3	0.784366
LMO7	0.78323
SFXN5	0.783048
AKAP3	0.782998
HSD17B2	0.782979
LIPT2	0.782903
CLIC5	0.782557
SH3BGRL3	0.781774
SLC1A5	0.780472
RASGRP2	0.779773
LOC102724985	0.77919
VDR	0.777004
ALDH1L2	0.776612
GMIP	0.776174
KIZ	0.776068
CROT	0.7758
ATP8B2	0.775505
ACTN1	0.77495
MAD1L1	0.773678
LDHAL6B	0.772688
VAV3	0.772301
SELL	0.771399
C1orf198	0.771212
JMJD7	0.770856
TRIM9	0.770554
ISG15	0.769668
ADGRL2	0.769085
HOGA1	0.767982
DDIT4	0.767435
ITPRIP	0.76695
EGF	0.766711
RHBDL2	0.766617
ARHGAP32	0.766135
GJD3	0.765977
HNF4G	0.765053
DUOXA2	0.764226
C8orf74	0.763796
FURIN	0.763689
CXCL10	0.763099
KIF13A	0.762236
EPDR1	0.762141
SLC8A2	0.761779
RNF212B	0.761464
EPB41L5	0.761354
SLC22A23	0.760082
DGKG	0.759729
DPYSL3	0.759614
LRP10	0.759521
GRK3	0.759251
CLCN1	0.758323
ANXA11	0.758203
CXCL6	0.757786
ITPKB	0.75772
CRTAM	0.757545
FRRS1	0.756873
PSD2	0.75598
ARHGAP11B	0.75582
RASGRF1	0.755678
TMEM132A	0.755487
PDGFA	0.755361
SH3KBP1	0.755159
TGFB1	0.755014
SOCS3	0.754024
XK	0.753157
ATP1B2	0.752968
ERBB3	0.752262
EXTL3	0.752106
NF1	0.751427
MED13L	0.751251
TIMP3	0.750995
DYNC1I1	0.75096
FAIM	0.750928
APOL1	0.750633
ARHGAP10	0.750441
BCL2	0.750054
SLC9A3	0.749593
ADA	0.749194
EDA	0.749172
KYNU	0.747848
SH3PXD2B	0.747316
SNX33	0.746392
KRT19	0.746211
PARP9	0.745829
GPRC5A	0.745418
PCDHGA6	0.744311
BHLHA15	0.743739
ZBED2	0.742352
ADORA2B	0.742065
FLG	0.741418
IL22RA1	0.741142
CST3	0.739856
EPSTI1	0.739142
CHST15	0.739065
TBC1D2B	0.73843
ISPD	0.738259
LYRM1	0.73726
GLCCI1	0.736912
TMEM246	0.736629
FAM129B	0.735704
TSHZ3	0.735456
CARD6	0.734691
ZBTB9	0.734523
PPP1R3G	0.734476
CAMSAP1	0.734301
TMEM117	0.734041
DUSP6	0.732886
ACMSD	0.732166
ITSN2	0.732108
SLC9A3R1	0.730709
FAM212B	0.73052
ASAP3	0.729639
SLC27A1	0.728783
CAPN3	0.728711
MYD88	0.728671
CHST12	0.728015
MARVELD3	0.727857
ZNF609	0.727855
TRIM16	0.726622
SULT1A4	0.726321
SLC35D1	0.724968
F3	0.724781
MYH14	0.724654
PTK7	0.72336
IRF2BPL	0.722618
CPO	0.722231
DHX8	0.722105
DNAJC5	0.72107
PTPRK	0.720863
SOCS2	0.720116
ZBTB43	0.720083
GRK5	0.720062
PCDHGC4	0.71982
TNFRSF25	0.719425
C15orf41	0.71935
OSMR	0.719002
LLGL1	0.718653
CYP4X1	0.717792
APOBEC3F	0.716115
MMP3	0.715323
SWAP70	0.713611
LIPJ	0.713329
ALG3	0.710978
DEPDC7	0.710833
BCORL1	0.7108
CDC42SE1	0.709338
FKBPL	0.709132
HTRA1	0.709032
GSTP1	0.708044
SLC19A3	0.707875
IFNL2	0.70685
TLR3	0.704392
NBPF14	0.703571
CDK6	0.70338
RAB43	0.701092
ALDH4A1	0.700298
FGD1	0.699983
SIX1	0.699577
DSC2	0.699351
MFSD12	0.699342
TYRP1	0.697685
MLANA	0.697595
OVOS2	0.697217
LIMK2	0.696117
RASSF10	0.694985
RYR1	0.694921
FRAT1	0.694784
REEP4	0.694419
KIFAP3	0.694031
ABCG2	0.693958
GADD45A	0.693804
ABCC11	0.693575
ITGA5	0.692383
SERPINB1	0.691899
HS3ST5	0.69141
CCRL2	0.69127
MESDC1	0.691041
SERPINA6	0.690691
HOXA5	0.690338
ITGBL1	0.690236
SLC17A2	0.689828
PPP1R18	0.689311
DAPP1	0.689247
DTX3L	0.68917
ID3	0.687204
ASCC3	0.686694
PLS3	0.686614
ERVMER34-1	0.686504
LYST	0.686459
NXPE3	0.6862
RB1	0.686094
SMPD1	0.685635
LIMS4	0.685108
GPSM3	0.685005
EMP2	0.684747
ZFPM1	0.684697
CNN2	0.684664
SLC26A2	0.684601
MB21D2	0.683971
PYCR2	0.683592
LOC107984799	0.68335
MLLT4	0.682926
ARL9	0.680669
EN2	0.680232
SSH3	0.680209
SH3RF3	0.680143
LOC107986755	0.680051
SMO	0.679934
INPP4A	0.679527
BNIPL	0.67921
ADAR	0.679153
FAM110A	0.678546
C15orf39	0.678122
PALLD	0.678105
DDX58	0.677591
TMC8	0.676694
LOC102724642	0.675734
PPIF	0.675437
ACOX2	0.674873
HK1	0.674665
PPP2R3A	0.673754
MYLK4	0.673628
KBTBD8	0.673388
TRIM16L	0.673291
40787	0.673239
GYPE	0.672415
MKNK2	0.672403
CD3EAP	0.672297
MOB3A	0.672027
TMEM229B	0.671555
FGD3	0.671464
NID1	0.670379
MARK4	0.670368
ADGRG1	0.669932
FRMD3	0.669691
LOC101927685	0.669033
LYSMD4	0.667442
ZNF697	0.666792
PKP2	0.666247
EBF4	0.665913
MARVELD2	0.66583
RIMS3	0.665593
GALNT18	0.665462
NTAN1	0.665322
CERS6	0.665246
BTRC	0.665034
CTDSP2	0.664003
FAM83H	0.663715
UBALD2	0.66369
CSNK1G1	0.662791
C4orf36	0.66279
BAIAP2	0.662307
LIPM	0.661968
STK10	0.661056
MIA2	0.660378
RAB40B	0.66033
TMBIM1	0.660241
WDR91	0.659993
RTN1	0.6597
EPHA1	0.659693
PIK3CB	0.659425
THBS2	0.659256
SLC30A3	0.657752
KLHL10	0.657276
STK38L	0.656868
PI16	0.656776
TLL2	0.656645
RAB6B	0.656495
ZNF488	0.655621
BANP	0.653996
EHHADH	0.653037
LOC107986531	0.652842
RPRD2	0.651993
EHD2	0.650757
MAPRE2	0.650084
HNF1B	0.649379
SERPINB9	0.649296
GNA12	0.649116
SERPINH1	0.648679
VIPR1	0.648452
EGR1	0.648245
C14orf178	0.647611
NFKB1	0.647428
MIXL1	0.647127
FAH	0.646593
MARK2	0.646359
CST1	0.646015
RGS2	0.645472
CXCL16	0.645049
ABLIM3	0.644881
SERPINA4	0.644702
CRKL	0.643757
SLC39A10	0.642878
PTPRE	0.642381
ITGB3	0.642055
CYBB	0.641379
HLA-C	0.641311
LDB3	0.640185
ZNF710	0.640181
TPST1	0.6398
ZC3H7B	0.639737
CD14	0.638157
LOC107984314	0.637924
RHOB	0.637678
DOCK8	0.637601
TBX15	0.637457
FSTL1	0.637438
TMCC2	0.637398
IFIT5	0.635841
DYNC2LI1	0.635766
NCOA6	0.635759
PHGDH	0.635659
ITPRIPL2	0.63535
PRKCQ	0.635288
EHD4	0.634227
FPR1	0.634178
LBH	0.634037
LOC100287896	0.633909
SLC29A3	0.633653
CCDC97	0.63363
MX2	0.632364
PLAC1	0.632183
FAM189B	0.631395
CEACAM3	0.629225
PLPPR2	0.628855
IFIT2	0.628241
RFX7	0.628087
NCOA1	0.627605
PCK2	0.627588
BLMH	0.62739
LOC105372798	0.626494
ELK3	0.624969
TMEM104	0.624383
PERM1	0.624214
BCAP31	0.624047
IGF2R	0.62343
NOTCH1	0.622617
NSD1	0.622055
SP9	0.621496
PRKCD	0.621295
RNASEL	0.620613
CIC	0.619038
SLC2A1	0.618375
KLHL21	0.618271
TCF7	0.617539
LOC105375355	0.617346
MOB3C	0.617311
MYO1D	0.617137
APOL3	0.617101
ARHGAP9	0.617033
SORBS1	0.616998
ROBO4	0.616858
CCNJL	0.616814
FBXL19	0.616501
CADPS2	0.616422
KIAA1456	0.616215
RDM1	0.615258
LRP12	0.615226
SERPINB5	0.615059
PHF2	0.615002
SLC6A9	0.614955
ALOX12B	0.614456
PIK3IP1	0.614314
MYO1H	0.614095
FOXA1	0.613943
RNF213	0.612869
PRRG4	0.612644
VPS18	0.611549
SP110	0.610988
RAC2	0.610977
KDM6B	0.610909
TMEM30B	0.609611
PCYT1A	0.6095
MALL	0.609435
PPP4R1	0.609199
FAAP24	0.609066
SLC9A2	0.608317
DTX4	0.607864
PPP1R14D	0.607786
CEBPD	0.607738
FRYL	0.607609
VPS13D	0.606874
SLC30A10	0.606271
GFRA3	0.605805
G6PD	0.605782
BRPF3	0.605104
TBXA2R	0.604894
FBN1	0.604617
KAZN	0.603954
TTC39B	0.603773
TAF3	0.603769
STOX2	0.603662
ARHGAP8	0.603526
ADM	0.60326
ITPK1	0.603114
HOXC13	0.602251
GRM2	0.60173
GRAMD3	0.601439
UPK3B	0.601294
MAGEE1	0.601239
GBA	0.601141
AGMAT	0.601124
FAM222B	0.600516
MORC3	0.599653
SLC25A6	0.599482
BARX1	0.598314
SOSTDC1	0.598133
WDR72	0.597702
SUFU	0.597581
RTN4RL1	0.596492
BLNK	0.596121
GLTP	0.595752
ZFAND3	0.595165
TAOK3	0.595019
FAM105A	0.594802
FAM126A	0.594626
DDB2	0.593985
FLOT1	0.592672
TMEM217	0.592169
PLEKHM3	0.591425
PPFIA3	0.590703
WNT3	0.590287
ZNF790	0.590245
PJA1	0.590039
SIRPA	0.589817
TBXAS1	0.58973
CHSY3	0.589375
CCDC149	0.589341
ARHGAP31	0.589215
PACS1	0.588778
VILL	0.588545
EIF4G1	0.588411
LFNG	0.588214
STK24	0.587966
LOC102724428	0.587836
ATAD3C	0.58762
UPK1B	0.587297
LOC100996763	0.586899
LOC107986554	0.586439
MROH8	0.586213
DBNDD1	0.585725
MIA	0.585352
ENOX2	0.585198
PRDX5	0.584909
MAPKBP1	0.584128
MANSC1	0.584047
STIM1	0.583958
C19orf66	0.583772
CD6	0.583674
RASL11B	0.583642
DPP4	0.58346
CLINT1	0.582953
ABHD11	0.582796
LIPA	0.582673
BAK1	0.582572
TMEM127	0.582494
TMC4	0.582248
JUNB	0.580761
MT1E	0.580633
FOXQ1	0.580585
ZFYVE9	0.580475
ZNF551	0.580311
TRIM21	0.580304
FAM169A	0.580288
PCDHGB4	0.580215
EGR2	0.580026
LPCAT4	0.579722
RANGAP1	0.579595
CTTNBP2	0.579513
PPP2R5B	0.579418
DHX58	0.579401
STAT1	0.57934
ARHGEF5	0.579177
PCDHGB7	0.579048
SLC35E3	0.578395
FEM1A	0.578307
PRRT4	0.577675
NLRC5	0.577431
FXYD6	0.576966
C10orf2	0.576318
SIK1	0.576189
ZNF282	0.576077
CTSD	0.575962
GP1BB	0.575724
LOC107987428	0.575529
ATP2A2	0.574921
SDHA	0.573201
RIN2	0.573019
LOC101930420	0.57284
OAF	0.572519
ARL10	0.572131
WBSCR27	0.571826
TCOF1	0.571649
TESK2	0.570863
ZNF628	0.570684
CPEB4	0.570331
CASP7	0.569513
MAP4K4	0.569496
GUCA2A	0.568791
MRC2	0.568759
ECE2	0.56839
PLSCR2	0.568111
ANKRD2	0.566682
SLC1A4	0.566655
PSME4	0.566593
MYO5B	0.566369
MERTK	0.566251
DEDD2	0.566132
RAVER2	0.565666
CPS1	0.565613
SERPINF2	0.565183
PADI3	0.56517
IKBIP	0.565084
GRHL2	0.564982
HCN2	0.564605
RASA4	0.564366
ATP6V0C	0.564034
TMEM79	0.563915
PPP2R1B	0.563611
SAP30L	0.56269
RAB19	0.562201
CHRNB4	0.56102
NEURL3	0.560744
RHOD	0.560264
CLDN14	0.560007
ARID3A	0.559394
IL17RA	0.559338
FZD8	0.559278
SLC28A1	0.558475
TMIE	0.558031
DCT	0.557239
ASH1L	0.557206
CEMIP	0.556636
SLC35A4	0.556358
SLC48A1	0.555869
NUP188	0.555801
TXNDC17	0.555263
VAV2	0.554956
MTA2	0.554651
TOMM40L	0.554283
MAPK6	0.553947
DZIP1L	0.553214
PLCE1	0.55281
ARG2	0.552491
POLR3D	0.550669
MT1A	0.550653
UBAP1	0.550555
SHD	0.550379
ATP1A1	0.549911
NHSL1	0.549755
ITGB4	0.549695
WDTC1	0.549622
MICB	0.549481
COPZ2	0.549446
TMOD2	0.549241
SLC3A2	0.54908
MFN2	0.548713
TRIM14	0.548641
DSEL	0.548341
MAFK	0.548307
LOC107985381	0.548186
ZHX1	0.547396
CHTF8	0.547038
SHANK3	0.547007
NAT8L	0.546685
DGCR2	0.546236
VWA2	0.545774
PTRF	0.545702
GRPEL2	0.545441
ADARB1	0.545285
HS3ST1	0.54521
ATP11B	0.545178
GAST	0.544927
TFEB	0.544568
ZNF649	0.544552
NOTCH2NL	0.544428
TJP2	0.544189
GAREM1	0.544123
ZNF132	0.543548
SMARCD1	0.543372
KLF11	0.543179
HSD17B6	0.542791
MKL1	0.542791
ENHO	0.54235
RNF187	0.541971
LPAR2	0.54191
SUV39H1	0.541528
LPAR5	0.541141
C19orf57	0.541139
LAP3	0.540628
GBGT1	0.540569
KCTD21	0.540381
PCTP	0.540287
MBD2	0.540121
SYTL2	0.53945
ANKS1A	0.539317
WASF2	0.538754
FAM118A	0.53848
ATL2	0.537386
TMEM41A	0.537315
PLEKHA2	0.537015
SSBP3	0.536994
ARL5B	0.536703
DUSP11	0.53595
MIDN	0.535907
SLCO2B1	0.535368
DGKA	0.534039
UBN1	0.53382
SCD5	0.533661
FSIP1	0.533636
PSME3	0.533521
C1QTNF9B-AS1	0.533398
IGSF8	0.533276
C3orf52	0.532968
PPIC	0.532913
LOC105377135	0.532749
GEMIN5	0.532488
SQRDL	0.53247
C16orf74	0.532179
PLB1	0.531827
SIK3	0.531685
TNFRSF8	0.531598
ZNF777	0.53159
APEX2	0.531329
NOL6	0.531227
CKMT1A	0.531181
REXO4	0.530601
B4GALT5	0.530531
ZNF251	0.529765
UGDH	0.529721
EDEM1	0.5296
TBX6	0.529046
PRKX	0.528361
TSPAN18	0.52785
NCOA2	0.527814
NKIRAS2	0.527548
MED30	0.526756
EIF4EBP2	0.526595
NPC1L1	0.526407
MYEOV	0.525906
CREB3L2	0.525191
PLSCR1	0.524942
NOMO2	0.524941
TSSK2	0.524758
CYP2B6	0.524556
PFKFB2	0.524533
PRAME	0.524521
BST2	0.52444
FANCE	0.523765
MAP7D1	0.523765
KBTBD11	0.523326
OSBP	0.52316
PTPN1	0.522592
NBPF10	0.522045
DYNLL2	0.522001
TDRD7	0.520867
SCAMP2	0.520503
DDO	0.520134
PLEKHG1	0.520057
ISM2	0.520016
WARS	0.519861
ZBTB44	0.519578
HIST1H2BJ	0.519463
PRUNE	0.519046
APOL6	0.518803
ATG9A	0.518387
LEO1	0.518031
ANKRD22	0.518005
ZNF324B	0.517346
SNTA1	0.516834
DDR1	0.516392
PPP1R9B	0.516117
KIRREL2	0.515655
KDM2A	0.515281
FAM213B	0.515265
SPECC1L	0.515263
C17orf96	0.51523
PTER	0.515185
SH3GL1	0.515173
EIF5AL1	0.514865
IGSF11	0.514804
SEC24D	0.51469
GPATCH3	0.514668
HK2	0.51451
EIF3C	0.51439
SPTLC3	0.514154
APAF1	0.513942
SYT3	0.513887
TTYH3	0.513828
RHOBTB2	0.513595
IL17D	0.513407
SUSD2	0.513135
ARNT2	0.51299
TMEM185A	0.512665
YOD1	0.512466
HIVEP2	0.51246
TSPAN10	0.512407
HSPA8	0.512212
ARHGAP1	0.511333
CD68	0.511323
IFI30	0.511131
GPT2	0.510899
BTBD9	0.510603
GRK7	0.510066
C1QTNF6	0.509806
GEMIN4	0.509535
GLUD2	0.509505
SIK2	0.509476
VANGL1	0.508203
AMDHD1	0.508164
AKR1B1	0.508039
SCAF1	0.50803
RPAP1	0.507636
SEC14L1	0.507445
PRDM6	0.507347
COA7	0.507253
AIF1L	0.507186
SPC25	0.507036
PML	0.506707
BRMS1L	0.506455
NOD2	0.505925
HDAC5	0.505903
ZNF641	0.505479
KANSL1	0.50523
KIAA1217	0.5052
PDLIM1	0.505106
EIF2AK2	0.504762
AP1B1	0.504529
NAPA	0.504363
NUDT8	0.504362
BPTF	0.504228
[truncated: 12,506 more rows]

## Sheet: Mouse ranked TP63 vs empty
Gene_ID	LOG2FC
Ltf	6.67997
Clca1	6.48811
Gkn2	5.96464
Gkn1	5.4738
Fcgbp	5.29523
Spink4	5.26284
Adgrg7	5.23829
Asprv1	5.04472
Cyp2c65	4.8138
Ngp	4.65323
2310057J18Rik	4.63694
Retnlg	4.51602
Lypd8	4.27017
Pigr	4.2044
Cxcr2	4.19706
Dpcr1	4.12654
Prap1	4.07401
Ugt2b35	3.92926
Chil3	3.92675
Olfm4	3.78171
Ugt2b34	3.77988
Stfa2l1	3.7703
Ceacam12	3.69125
Ccl28	3.66479
BC100530	3.64785
S100a8	3.61354
Phgr1	3.60503
S100a9	3.55344
Il1f9	3.50034
Sptssb	3.47728
Erich5	3.46006
Prss32	3.44895
Aadac	3.43164
Gm3776	3.41696
Spatc1	3.24331
Pglyrp1	3.23226
Wfdc21	3.18437
Sectm1b	3.14438
Muc5ac	3.14148
Cxcl5	3.10857
Cldn18	3.10748
Ambp	3.06543
Cyp2j5	3.05215
Slc9a2	3.02791
Gsta1	3.02496
Tff3	2.96994
Ces2c	2.96836
Nlrp12	2.95765
Prok2	2.94519
Tenm4	2.93891
Gm5483	2.93165
Tff1	2.9125
Aqp3	2.91204
Sftpd	2.90649
Psca	2.86229
Slc26a3	2.85845
Teddm3	2.83541
Gcnt3	2.82099
Gabrp	2.81694
2210407C18Rik	2.80951
Fer1l4	2.78767
Prom1	2.78133
Lypd6b	2.77974
Ifit1bl1	2.77911
Oit1	2.76391
Lcn2	2.76001
Sult1c2	2.7377
Ckmt1	2.73249
Csf3	2.73211
Duox2	2.73207
Car2	2.72555
Mpo	2.71602
Alpi	2.71091
Stfa2	2.69312
Rbp2	2.6928
Slfn4	2.68641
Ppp1r1b	2.6675
Gypa	2.6631
Tmem54	2.65176
Sell	2.63864
Pof1b	2.62996
Ly6d	2.62831
Psapl1	2.62441
Tmprss4	2.62236
Akr1b7	2.62123
Cited4	2.61986
Plet1	2.60222
Sprr2a3	2.5979
Trem3	2.59765
Ccl20	2.59733
Cxcl2	2.59403
BC117090	2.58085
C4bp	2.56649
Mmp8	2.54585
Cyp2d10	2.53045
S100g	2.5247
Mme	2.52189
Ugt8a	2.51559
Siglecf	2.51122
Ern2	2.50703
Ifit1bl2	2.50086
Sult1b1	2.48433
Tmem45b	2.48051
Sgpp2	2.47339
Gsta3	2.47058
Slc26a9	2.45814
Fgfr4	2.44129
Slc2a2	2.43427
Mcpt4	2.42643
Muc13	2.42337
Smim6	2.41412
Avil	2.41078
Il1r2	2.40999
Cldn2	2.40777
Tacstd2	2.40301
Tmem229a	2.39406
Mxd1	2.36776
2810459M11Rik	2.3614
Hcar2	2.3586
Slc34a2	2.3528
Pllp	2.35107
Slc4a1	2.33764
Ttr	2.33537
Rbm24	2.33488
Vnn1	2.32331
Nfe2	2.29254
Gm3336	2.28036
Lrrc26	2.28033
Il1b	2.27188
Mogat2	2.26391
Mmp9	2.26266
Gpx2	2.2575
Slc9a4	2.24422
Amer2	2.24107
Gpa33	2.24084
Ptprh	2.23918
Muc4	2.22802
Cidea	2.19954
Myo1a	2.19238
Rassf9	2.18965
Atp10b	2.18093
Slc1a1	2.16894
Itgal	2.16445
Spink6	2.15872
Vil1	2.14571
Ano7	2.13048
Cd177	2.12937
Mrgpra2b	2.11293
Ces2b	2.1032
Shh	2.09964
Atp1b1	2.09863
Mcemp1	2.09742
Tspan1	2.09577
Kcnk5	2.08747
Abcc8	2.08598
Saa3	2.08531
Pzp	2.08134
Gsta2	2.07983
Csf3r	2.07248
Mkrn2os	2.06568
Slc28a3	2.05566
Parm1	2.05092
Tspan8	2.04803
Trim10	2.0451
Cma1	2.04445
Acox2	2.04391
Gsta4	2.04057
Car1	2.03552
Ms4a3	2.0236
Agt	2.00706
Gjb1	2.00477
Akr1c19	1.99723
Pip5k1b	1.98217
Fam3b	1.97237
Slc44a4	1.9691
Camp	1.96834
Trim30b	1.95595
Sycp2	1.95275
Fam83e	1.94423
Capn13	1.93809
Anxa13	1.91492
Alas2	1.91442
Nags	1.90645
Fut2	1.9036
Ankrd22	1.89621
Gm11545	1.89428
Cryaa	1.89344
Ocstamp	1.88902
Atp2a3	1.88599
Ipcef1	1.87909
Clic6	1.85918
Pdx1	1.85518
Pla2g10	1.8541
Ehf	1.85245
Rab25	1.85098
Adora1	1.84873
Lad1	1.82405
Agr2	1.822
Hp	1.81075
Slc39a4	1.81015
2010109I03Rik	1.80938
Sorl1	1.80359
Tpsb2	1.79864
Wfdc2	1.79852
Vsig2	1.79617
Fbp2	1.79558
Vsig1	1.7918
Cxcl1	1.78812
Hr	1.77616
Fpr2	1.77141
Duoxa2	1.75977
Rhov	1.75951
Kcnk1	1.75019
Wwc1	1.74253
Rab44	1.73033
Paqr5	1.72548
Fa2h	1.72233
Osgin1	1.7216
Acnat1	1.72038
Rasal1	1.71635
Glb1l2	1.71217
Tmprss2	1.70778
Rassf10	1.7047
Myh14	1.70201
Cpa3	1.70138
Dgat2	1.70127
Ctsg	1.69592
Cyp4f40	1.69253
Paqr8	1.67542
Cldn7	1.67448
Hpgd	1.67196
Tarm1	1.67004
Ildr1	1.66633
Syt16	1.66437
Gkn3	1.66176
Sowahb	1.6593
Rufy4	1.65513
Snca	1.64826
Oas3	1.64724
Slc25a48	1.64668
Ltb4r1	1.6462
Prrg4	1.64485
Pklr	1.64386
Sidt1	1.63914
Slc37a1	1.63844
1700066B19Rik	1.63755
Rsad2	1.63271
Themis3	1.62682
Slc6a20a	1.62231
Vnn3	1.61899
Sh2d4a	1.61522
Otop3	1.61458
Mt3	1.61221
Cideb	1.60711
Plin4	1.60308
Treml4	1.60088
Slc44a3	1.59011
Epn3	1.58906
Dmbt1	1.58852
Lyst	1.58837
Mansc1	1.58545
Ceacam2	1.57156
Krt5	1.57093
Dsc2	1.56546
Itih5	1.56322
Capn8	1.5619
Crp	1.56166
Ltb	1.56056
Entpd3	1.55704
2610528J11Rik	1.55516
Ces1f	1.55226
Dedd2	1.54966
Agpat9	1.54827
Gpd1	1.54513
Rab11fip1	1.53896
Cdhr2	1.53571
Mrgpra2a	1.5344
Prox1	1.52513
Stc2	1.52088
Urah	1.51749
Tm4sf4	1.51723
Pla2g2d	1.5163
Slc52a3	1.51365
Kcnk10	1.50807
Rep15	1.50222
Slc5a9	1.50074
Slfn1	1.50069
Mmp7	1.49894
Phospho1	1.49292
Tspan33	1.49091
Tlr12	1.49009
Serpina1b	1.48973
Elf3	1.48895
Nqo1	1.47556
F10	1.47209
Pah	1.46789
Clca3a2	1.46773
Epcam	1.46637
Ccdc103	1.45839
Slc28a2	1.45785
Oscar	1.45729
Liph	1.45684
Trpv6	1.45637
Gal3st1	1.45635
Mia2	1.4551
Ifitm1	1.45214
Serpinb2	1.44934
Slc13a3	1.44652
Pamr1	1.43813
Chrm3	1.43733
Cfd	1.43655
Hnf4g	1.43615
Grhl3	1.43612
Pcsk9	1.42735
Acpp	1.42682
Mtcl1	1.41594
Cass4	1.4146
Marveld3	1.41119
Sh2d3c	1.41079
Coro2a	1.40721
Cldn1	1.40544
Atp1a3	1.40366
Adgrl3	1.40247
Pram1	1.39834
Tc2n	1.39574
Krt19	1.39547
Muc1	1.39363
Aldh1a7	1.39335
Trem1	1.3931
Sel1l3	1.39222
Bdh1	1.38718
Defb1	1.38558
Cidec	1.38557
Hmgcs2	1.38499
Sdcbp2	1.37986
Proser2	1.37901
Hemgn	1.37894
Tesc	1.37419
Tmem30b	1.37129
Clmn	1.36999
Dnajc22	1.36873
4921507P07Rik	1.36617
Irx3	1.36532
Nipal2	1.36436
Anxa10	1.35693
F2rl1	1.35642
Clec4e	1.35248
Tstd1	1.35062
Scin	1.34929
Il1rn	1.34858
Gprc5c	1.34574
Tox3	1.34525
Tmem116	1.34492
Slc40a1	1.3449
Tmc5	1.34444
Gm1045	1.344
Mlph	1.34374
Igsf9	1.34186
Mgam	1.33559
Misp	1.33397
Eps8l1	1.33395
Cdh17	1.33335
Chil1	1.33093
A230065H16Rik	1.33032
Klf5	1.32988
Pkp1	1.32937
Olfr111	1.32808
Pag1	1.32738
Ttc22	1.32493
Hook1	1.32122
Car9	1.31938
E2f2	1.31882
Tff2	1.31784
B3gnt3	1.31671
Gm15816	1.31637
Paqr9	1.31606
Car3	1.31525
Cyp2b10	1.31366
Mfi2	1.31341
Ctse	1.30996
1700020L24Rik	1.30305
Spint2	1.30024
Slc15a2	1.3
Tnfsf10	1.29961
Ces2a	1.29487
Gm1966	1.29472
Celsr2	1.2927
Bche	1.29129
Adipoq	1.29106
Igf2	1.29092
Lrp5	1.28959
Eps8l3	1.28909
Arl14	1.28291
Pcdh15	1.28155
Cblc	1.28076
Foxq1	1.28041
Cdcp1	1.28026
Tmem132e	1.27705
Hspa1a	1.27548
Sirpb1b	1.274
H2-T24	1.26928
Nr1i2	1.26751
Susd4	1.2669
Sort1	1.26666
Akr1c14	1.26641
Pkhd1	1.26588
Sult1d1	1.2636
Trim40	1.26214
Fgr	1.25801
Unc5cl	1.25795
Ap1m2	1.25754
Gng4	1.255
Cp	1.24943
Marco	1.24646
Itgad	1.24372
Tm4sf20	1.24342
Tead4	1.241
Grhl2	1.2407
Spint1	1.23392
Clu	1.23363
Cd101	1.2333
Fgfr2	1.2329
Slc4a4	1.23074
9530053A07Rik	1.23069
Pik3c2g	1.23043
Ceacam1	1.22935
Styk1	1.22698
Chdh	1.22572
Sema6a	1.22455
Sema4a	1.22453
Slc9b2	1.22427
Glp1r	1.21843
Acta1	1.21729
Nos2	1.21724
Tmem125	1.21573
Klhdc7a	1.21387
Lrg1	1.21364
Cxcl17	1.21151
Igsf23	1.20995
P2ry2	1.20858
Fetub	1.20748
Lamb3	1.2073
Klra17	1.20588
Pard6b	1.20491
F830016B08Rik	1.20479
Ccrl2	1.20064
Elfn1	1.19947
Plch1	1.19662
BC021891	1.1964
Hdc	1.19608
Sowaha	1.19558
Mal2	1.1955
Hsd17b2	1.19321
Cldn23	1.1921
Mgst2	1.19129
Tmem184a	1.19037
Tmc4	1.18638
Lilra6	1.18589
Orm2	1.18429
Dsp	1.18184
Acp5	1.18155
Clec4d	1.17599
Sema4g	1.17504
Fsd1	1.17384
Casz1	1.1735
Sema3g	1.17159
Igsf5	1.16984
Rab11fip4	1.168
Cd24a	1.16792
Anks4b	1.16714
Retn	1.16583
Krt8	1.1653
Krt23	1.16474
Lgals12	1.16237
AA986860	1.16225
Ptprt	1.15944
Fam83g	1.15933
Tspan15	1.15887
Slc22a23	1.15751
Mefv	1.1573
Adam28	1.15307
Fam65b	1.15259
Acsm3	1.15057
Elovl7	1.1501
Hpn	1.14668
Vtcn1	1.14448
Fam71f2	1.14339
Slfn14	1.14188
Kel	1.14137
Il1a	1.13686
Adgre5	1.13603
Hnf4a	1.1342
Ccnjl	1.13159
Dcdc2a	1.13093
Itpka	1.13006
Calca	1.12957
Ppp1r3b	1.1288
Cdh2	1.12865
2310007B03Rik	1.12818
5330417C22Rik	1.12807
AA467197	1.12708
Olr1	1.12572
Usp43	1.12421
Fermt1	1.12331
Slc12a2	1.12157
Plekha6	1.12021
Lurap1l	1.11617
Cxcl12	1.11553
Plek2	1.11417
E330009J07Rik	1.11316
Adamtsl4	1.11153
Zfp750	1.10959
Egln3	1.10821
Ptprr	1.1074
Mal	1.10699
Onecut3	1.10615
H2-Q2	1.10532
Gsto1	1.10257
Chac1	1.10083
Hmga2	1.09916
Ihh	1.0986
Hunk	1.098
Kcnq1	1.09715
Slc35c1	1.0952
Smpd3	1.0952
Gipc2	1.09482
Ovol1	1.09436
Hpdl	1.09365
Stfa3	1.09358
Trim29	1.09175
Slc12a8	1.09026
Ces2g	1.08914
Car12	1.08827
Art4	1.08797
Celsr1	1.08668
Trim9	1.08627
Flrt2	1.08617
Gapdhs	1.08381
Gc	1.08217
Atp2c2	1.08174
Dact2	1.07985
Adcy8	1.07975
Cftr	1.07971
Cldn3	1.07942
Tprg	1.07827
Hsh2d	1.07547
0610040J01Rik	1.07476
Ripply3	1.07269
Fcrlb	1.07157
Ocln	1.06985
Gm5150	1.06581
Ralgapa2	1.06444
Cdh1	1.06429
Gja4	1.06395
Ank1	1.06214
Tjp3	1.06029
Fam46b	1.05837
Rnf186	1.05567
Epb42	1.05349
Bst1	1.05179
Rnf128	1.05173
Helz2	1.05126
Tmem102	1.05036
Hif3a	1.05001
Sdk1	1.04927
Mcpt2	1.0487
Tlr6	1.04553
Elane	1.04373
Stard10	1.04
Cep170b	1.03915
Ankrd33b	1.03767
Pparg	1.0371
Mab21l3	1.03613
F7	1.03466
Scara3	1.03383
Hkdc1	1.03332
Slc7a11	1.03328
Lamc2	1.03319
Sox21	1.03295
Fxyd3	1.03105
Rassf7	1.03076
Fam83b	1.02991
Capsl	1.02939
Serpinb5	1.02801
Erbb3	1.028
Il17ra	1.02788
Adgrf1	1.0233
Sorcs1	1.0229
Rassf6	1.02281
Flrt3	1.02205
Ppp1r3d	1.0215
Spta1	1.02027
Fpr1	1.01977
Pglyrp4	1.01862
Zdhhc15	1.01841
Cmpk2	1.01738
Cpz	1.01657
Aldh1l2	1.01581
Tnfsf14	1.01195
Fam107a	1.0117
Soat2	1.01043
Zc3h12a	1.00958
Sema3a	1.00955
Btc	1.00604
2610528A11Rik	1.00526
Syt14	1.00057
Nod2	1.00049
Sfn	0.999671
Elovl6	0.99951
Kcnn4	0.998506
Arhgef16	0.99809
Fgd3	0.997033
1700029F12Rik	0.996074
Fam229a	0.996074
Fmo3	0.996074
Fut9	0.996074
Gdf2	0.996074
Kcna7	0.996074
Krt1	0.996074
L3mbtl4	0.996074
Myoz2	0.996074
Nipsnap3a	0.996074
Rxfp1	0.996074
Tcp10c	0.996074
Tex38	0.996074
Trp73	0.996074
Vwc2	0.996074
Zcchc5	0.996074
Atp6v0d2	0.991738
Cldn10	0.991719
Apol9b	0.991701
Hnf1b	0.990745
Cfi	0.990547
Mall	0.988279
Pdzk1ip1	0.984639
Kcne3	0.984126
Spire2	0.983812
Prdm16	0.98358
Tbc1d2	0.983446
Agrp	0.983116
Ankmy1	0.983116
Btbd8	0.983116
Clec4a4	0.983116
Grm8	0.983116
Klra3	0.983116
Ldhal6b	0.983116
Mesp1	0.983116
Nanog	0.983116
Rgs6	0.983116
Trf	0.983061
Il18rap	0.98179
Wbscr17	0.981303
Macc1	0.979589
Cd244	0.978247
Cutal	0.9781
Epha4	0.977768
Myo5c	0.974745
Abcg3	0.974399
Asz1	0.97389
Tpsab1	0.973336
Arhgef19	0.971395
Siglece	0.970852
Cd2	0.970274
Hist1h4d	0.970274
Mchr1	0.970274
Muc20	0.968935
Wfdc3	0.965395
Cd300lg	0.965213
Gpr55	0.963267
Cystm1	0.960108
Shroom3	0.958913
Mmp28	0.958747
Fam167a	0.95868
Adamdec1	0.956851
Lmbrd2	0.954783
Tfrc	0.952508
Aspa	0.952191
Tmem238	0.951352
Hivep3	0.949843
Nlrp3	0.948803
Cdsn	0.947667
Rab38	0.946339
Ccdc92	0.945762
Fam83h	0.944376
Isg20	0.943566
Rnf43	0.943566
Steap4	0.94227
1700024P16Rik	0.940943
Nmnat2	0.939759
Stk32b	0.935946
Pcdhb15	0.935511
Noxo1	0.934886
Cyb561	0.932951
Wnt7b	0.932254
Samd10	0.931609
Stx19	0.931185
Oasl1	0.93032
Pilrb2	0.927819
Chmp4c	0.927681
Kcnk12	0.926689
Padi1	0.924336
Hspa1b	0.922792
Ciart	0.920748
C77370	0.920215
Hgfac	0.918476
Krt20	0.91744
Lipg	0.915534
S100a14	0.914573
Efnb3	0.913188
Pld1	0.911033
Cxcl3	0.910447
Ppif	0.9102
Creb3l1	0.908819
Arg1	0.907555
Bnipl	0.907369
St14	0.907136
Ttc39a	0.906881
Pkp2	0.906649
Mep1b	0.902845
Apol9a	0.902606
Ccdc88c	0.902204
Foxa2	0.899813
Cxcl10	0.898927
Kdm6b	0.89725
Adra2a	0.896786
Tmc7	0.895385
BC021614	0.895153
Cdh6	0.894248
Alcam	0.89236
Llgl2	0.888619
Rhpn2	0.887435
Serinc2	0.886704
Itga2	0.886199
Fam184b	0.885647
Hoxb1	0.885647
Hoxd9	0.885647
Kcnk16	0.885647
Klhl41	0.885647
Sv2c	0.885647
Tnni1	0.885647
Yipf7	0.885647
Slc16a2	0.884096
Atp1a1	0.88338
Ddx60	0.883369
Ak4	0.8822
Sbspon	0.881965
Krt18	0.881955
Ces1g	0.881835
Notch3	0.881808
Ugt2b5	0.881061
1700011H14Rik	0.880828
2810474O19Rik	0.880432
Gm5535	0.88018
Ly6k	0.879373
C77080	0.878934
Slc5a2	0.878657
Serpina3g	0.878135
Clcn2	0.877812
Slc5a1	0.877342
Serpinb11	0.876071
Pik3ap1	0.875832
Fstl4	0.875673
Cd14	0.87511
Msi1	0.874967
Dsg2	0.874888
Dmrta2	0.87364
Pla2g4e	0.87364
Slitrk5	0.87364
Card6	0.87302
Zfp831	0.872066
Efna5	0.872018
Esrp1	0.871574
Fam187b	0.870842
Samd5	0.867315
Wfdc18	0.866676
Add2	0.866205
Lpar2	0.863633
Tnfaip3	0.86041
Fam234b	0.859168
Ccdc64b	0.85911
Cdk2ap2	0.85635
Lrrc75b	0.856328
Scn8a	0.856061
Bspry	0.854283
Cd274	0.851411
Angptl1	0.850922
Cst6	0.850922
Klk1b24	0.850922
Qrfp	0.850922
Tmc2	0.850922
Ubap1l	0.850922
Ybx2	0.850922
Ank3	0.850789
Itpr3	0.848729
Nfam1	0.848404
Themis2	0.84787
Vamp1	0.846395
Celsr3	0.846355
Lama3	0.846124
Vipr1	0.846004
Prkcz	0.845672
Pfkfb3	0.845434
Bcl3	0.845203
Tinagl1	0.843686
Pla2g12b	0.842652
Inadl	0.842442
Trim34b	0.84156
Mmp15	0.841441
Cadps2	0.841064
Npnt	0.839537
Igdcc3	0.8392
Nptxr	0.8392
Rhag	0.838059
Sptb	0.83531
Efnb2	0.834713
Mboat1	0.833801
Onecut2	0.83369
Ccr1	0.833688
Ppargc1a	0.833197
Camk4	0.83269
Zbtb42	0.83183
Sox9	0.830576
Ces2e	0.829214
Six2	0.827424
Il1rap	0.82466
Gpr182	0.824337
Nr1h4	0.82319
Sim1	0.82251
Il17re	0.822043
Sdsl	0.820832
Spn	0.817544
Itgam	0.813315
Ptgfr	0.812985
Calb2	0.811889
Abcc4	0.810506
Pclo	0.810083
Trpm2	0.808776
Foxo3	0.807032
Gcnt2	0.805157
Fam185a	0.804174
S1pr4	0.804102
Pacrg	0.803211
Apobr	0.80092
Abca3	0.796473
Csrnp1	0.795945
Egr3	0.795748
Lmtk2	0.79536
Phgdh	0.793623
Cxadr	0.792866
Srd5a2	0.7926
Zfpm1	0.792482
Plekhs1	0.791908
Cyp2a5	0.791459
Ccdc141	0.788442
Spsb4	0.787962
Epb41l4b	0.787643
Gfod1	0.787445
Klra2	0.78665
Rasgrp1	0.786567
Klf1	0.786414
Epha1	0.786371
Cldn13	0.786132
Syt8	0.785436
Nfkbia	0.785311
Wnt5b	0.783185
Cd27	0.783074
Gpr21	0.783074
Lrrtm2	0.783074
Mansc4	0.783074
Ntng1	0.783074
Oprl1	0.783074
Wdr95	0.783074
Pcdh1	0.783023
Naip1	0.782649
Sgms2	0.781772
Htr2a	0.780847
Tox	0.780195
Ifit3b	0.777736
Adgrl2	0.775191
Itga3	0.77492
Bcl2l14	0.774728
Kif12	0.772654
Tmem253	0.772219
Iyd	0.77055
Wisp2	0.77009
Abi3	0.769708
Rnf208	0.768889
Dll1	0.768669
Serpina3c	0.76788
AI661453	0.76716
Pim1	0.766848
Lzts3	0.766152
Cdkl5	0.765263
Esrp2	0.763771
Dcbld1	0.762896
Ifi44	0.762713
Lgals3bp	0.761425
Bdkrb2	0.761274
Brinp1	0.761119
Dtx3l	0.761107
Tmem56	0.758332
Vsig10	0.756337
Tnfrsf21	0.756241
Smoc1	0.753261
Ptprv	0.75267
Capn5	0.752603
Klk1b3	0.750706
Myh2	0.750706
Otc	0.750706
Hk1	0.750562
Rhd	0.74941
Spata13	0.749346
Slain1	0.749119
Areg	0.748796
Samd9l	0.74683
Tcf23	0.746482
Pcx	0.74609
Cap2	0.745708
Lrrc16a	0.745118
Nhlrc1	0.743651
Ly6g	0.743613
Zfp239	0.743335
Ccl2	0.742204
Cdh24	0.742143
Hilpda	0.741861
Gpr84	0.741622
4933428G20Rik	0.741036
Gpr4	0.740957
Slc22a18	0.740297
Itgb4	0.739027
Adamts9	0.738422
Ldhd	0.737564
Ifi27l2b	0.736558
Hoga1	0.735748
Stox2	0.735626
Olfml2a	0.733413
BC048403	0.73332
Crb3	0.730975
5730559C18Rik	0.73082
Rab27a	0.730583
Ifit1	0.730338
Zfp418	0.730212
Papss2	0.730156
Rhbdl2	0.729274
Cers6	0.729123
Zfp36	0.728638
Angptl4	0.728537
Slc5a8	0.726843
Cd300lf	0.725935
Cdk6	0.725482
Fam110c	0.722839
Shank2	0.722796
Fgb	0.722134
Map7	0.721791
Fn3krp	0.720112
Faah	0.719991
Hip1r	0.719938
Selenbp2	0.719271
Ncald	0.719254
Abra	0.719049
Fshr	0.719049
Ghrh	0.719049
Glyat	0.719049
Gm4861	0.719049
Grin2a	0.719049
H2-T3	0.719049
Ibsp	0.719049
Itih1	0.719049
Serpina1d	0.719049
Slc22a7	0.719049
Sult2a8	0.719049
Sult3a1	0.719049
Slc26a1	0.718804
Ankrd29	0.717287
Tmem121	0.716099
Cyp4f18	0.715914
Hoxa9	0.714818
Emilin2	0.713646
Zfp668	0.713084
Dhcr24	0.712702
Carns1	0.712187
Shroom1	0.711512
Fam57a	0.711084
Usp18	0.709994
Galnt10	0.709132
Slc37a3	0.708801
Met	0.708434
Adh1	0.708193
Rbm4b	0.708097
Sst	0.707179
Hnf1a	0.705958
Gimap1	0.705352
Ctsk	0.704362
Sipa1l3	0.703066
Myrf	0.702689
Aqp9	0.702228
Gata3	0.701505
Trib1	0.701422
Rtn4rl1	0.701234
Arhgap26	0.700119
Cyyr1	0.699764
Nfkbid	0.69933
Acss2	0.699255
Vsir	0.698445
Polq	0.697831
Rtp3	0.697804
Lrrc15	0.697561
Pck1	0.697337
Prr5l	0.696842
Atp10a	0.69666
Prr15l	0.693948
Slpi	0.693671
Itgax	0.692805
Tnfsf9	0.692679
Tnrc18	0.692658
C130050O18Rik	0.691982
Tnfrsf1b	0.691839
Col11a1	0.691338
Pkp3	0.69021
Cyp2s1	0.690099
Lsr	0.689777
Dusp9	0.688184
Pilrb1	0.687923
Aim1	0.687449
Arhgap32	0.68683
Gys1	0.686684
Gpd2	0.686482
Clip2	0.686348
Onecut1	0.686267
Slc26a2	0.686039
Mboat2	0.685974
6430548M08Rik	0.685765
Dpysl4	0.685729
Wdr31	0.685593
Gja5	0.685383
Ccdc3	0.684521
Trim56	0.683808
Slc45a3	0.683776
Shf	0.68307
Gpr35	0.683046
Smcr8	0.682117
Plpp2	0.681814
Lgr5	0.681532
Adm2	0.681151
Gm15056	0.680833
Gpr155	0.680082
Slc6a19	0.678861
Dusp1	0.676838
Perp	0.675479
Ms4a8a	0.675419
Mettl24	0.674496
Pdgfra	0.674423
Fam174b	0.674329
Hyou1	0.673884
Vangl1	0.671994
St3gal4	0.671969
Arsi	0.671946
BC024978	0.671775
Fmnl1	0.671305
Krt79	0.670797
1110017D15Rik	0.670428
Mvd	0.669509
Palmd	0.669475
Mcm10	0.669089
1700001J03Rik	0.668949
Gm5796	0.668949
Grid2ip	0.668949
Icam5	0.668949
Rimklb	0.668949
Slc7a13	0.668949
Usp51	0.668949
Pdzk1	0.66833
Krt86	0.667721
Bend4	0.667598
Rtn1	0.667282
Socs3	0.667127
Csf1	0.667049
Rasgrf2	0.666666
Plscr1	0.666336
Ndst1	0.666059
Arl10	0.66598
Jakmip1	0.665626
Mcf2l	0.665397
Kbtbd13	0.663802
Pcyox1l	0.663643
Hcar1	0.663572
Dot1l	0.662501
Abcg4	0.662315
Cmah	0.66115
Tm9sf4	0.660823
Reep1	0.66064
Exo1	0.660429
Lnx1	0.660294
Prss22	0.65903
Acsl6	0.658611
Lect1	0.658611
Mbnl3	0.658337
Erbb2	0.658112
Fgfr3	0.657658
Fgg	0.657573
Ceacam16	0.657224
Rpp25	0.655631
Cubn	0.65414
Kcnh2	0.653812
Zhx2	0.653442
Plxna1	0.653128
Slc22a15	0.65307
Igtp	0.652896
Cited1	0.65204
Pcdh17	0.651835
Pgm5	0.65114
Rasef	0.650746
Selenbp1	0.650485
Lrig1	0.649805
Tmcc2	0.648473
Fam102a	0.648036
Alg3	0.647992
Dram1	0.647829
Golm1	0.647734
Rhof	0.647549
Rap1gap	0.647323
Klhl38	0.646897
Clca3a1	0.646652
Kalrn	0.646348
Alox15	0.645588
Spred2	0.645173
Grtp1	0.644166
Igfbp2	0.643464
Upp1	0.643319
Gpatch3	0.642429
Zkscan6	0.641856
AU040320	0.639828
Gclc	0.639788
A530032D15Rik	0.639483
Dctd	0.639407
Crebbp	0.638756
Pilra	0.638667
Ccl24	0.638309
Grb7	0.637526
Serpina3i	0.637179
Samsn1	0.636905
Kbtbd7	0.635943
D630045J12Rik	0.63587
Itprip	0.635329
Myo6	0.635321
Igsf11	0.634352
Ccnt1	0.63433
Zfyve9	0.633638
Cacna1h	0.633342
Ankrd1	0.633023
Plk1	0.631616
Zfp507	0.631567
Tmem94	0.631393
Ly6e	0.630883
Cdc42ep1	0.630802
Steap1	0.629947
1600014C10Rik	0.629385
Marveld2	0.629329
Stard4	0.628427
D930015E06Rik	0.628342
Tom1l1	0.628334
Krt80	0.627604
Naip2	0.627101
Amacr	0.626883
Mfsd6	0.626506
Trib3	0.626185
Trex2	0.624936
Tfr2	0.624832
9030617O03Rik	0.624149
Csf2rb	0.623527
Taf15	0.623056
Znfx1	0.622635
Cers3	0.6218
Mecom	0.621381
Epha2	0.621176
Adamts14	0.621078
Chst8	0.621034
Dgkg	0.620942
Col18a1	0.619968
Ramp2	0.619946
Ttll11	0.619563
Vwa1	0.618881
Il18bp	0.618808
Calcb	0.618091
Slc16a3	0.61668
Kmt2d	0.615176
B3galt5	0.615158
Plvap	0.615107
Gprc5b	0.614593
Slc16a12	0.614349
Npepps	0.613089
Mtus2	0.61294
Prtn3	0.612091
Rest	0.611483
Gm7609	0.611468
Zfp366	0.610865
Zdhhc24	0.610832
Gtse1	0.610737
Habp2	0.60935
Ddit4	0.609287
Gatad2b	0.608116
Gm6086	0.608023
Acot1	0.607795
Aldoc	0.607651
Zfp341	0.607503
Lasp1	0.607472
Shisa5	0.606565
Akap6	0.605882
Slc25a30	0.605735
Rgs8	0.605363
Nbeal2	0.604866
Atg9a	0.603167
Wiz	0.60309
Tnfrsf14	0.602277
Pls1	0.601877
Furin	0.601703
Tmem45a	0.601146
Slc36a2	0.601034
Ehd3	0.600579
Mfhas1	0.600477
Tmem51	0.599841
Nynrin	0.599614
Abtb2	0.599422
Slc2a8	0.599049
Tie1	0.598326
Nap1l3	0.59776
Grin1	0.59736
F11r	0.59715
Cldn4	0.597134
Kntc1	0.597017
Hspa12b	0.596373
Rab27b	0.595698
Hmox1	0.595246
Grap2	0.594675
Slc39a11	0.594481
Clec14a	0.593557
Klf3	0.592911
Ifitm6	0.592292
Gpld1	0.591402
Itga4	0.590769
Spata2	0.590188
Chga	0.589967
Gdpd2	0.588978
Lair1	0.588531
Nlrc5	0.588437
Isg15	0.587686
Ulk3	0.587576
Ppard	0.58738
Cdh3	0.586978
Plxnb2	0.586661
Aldh3b2	0.586312
Ghdc	0.586108
Smox	0.585629
Galnt4	0.585623
Cdh13	0.585578
Hrh2	0.585089
Mdc1	0.585027
Serpina3n	0.584588
Scel	0.584424
Acvr1b	0.584253
Irf6	0.58377
Slc16a1	0.583454
Aph1a	0.583157
Abr	0.582971
Ahcyl2	0.582721
Pak4	0.581987
Optn	0.581479
Irgm1	0.580932
Kcng4	0.58051
Efcc1	0.580252
Jazf1	0.580117
Tef	0.579635
Opa3	0.579623
Elf4	0.578414
Tph1	0.578136
Galnt14	0.577787
Sema4d	0.577422
D17H6S56E-5	0.576672
Fancm	0.576391
Adgrg6	0.57605
Scnn1a	0.575812
Igf1r	0.575727
Cd44	0.575613
Gtf3c1	0.575602
Igf2r	0.575565
Arhgef17	0.575434
Plekhm1	0.575175
Ecm1	0.573885
Col5a1	0.573343
Glis3	0.573328
Tmem158	0.57326
Lypd3	0.572826
Dagla	0.57255
Stra6l	0.572519
Lag3	0.572267
Gcnt1	0.571304
Bcdin3d	0.57122
Serpind1	0.570959
Ppip5k1	0.570497
Arhgap27	0.570183
Tgfb2	0.56989
Trim58	0.569149
Tcfl5	0.568902
Zfp689	0.568663
Itgb2	0.567633
Plekhh1	0.567416
H6pd	0.567284
Hsph1	0.566215
Ptprf	0.56587
Garem	0.565009
Il1r1	0.564906
Gm15800	0.564816
Ubr4	0.563906
Col1a1	0.563861
Stmn4	0.563719
Zfp395	0.563398
Ero1l	0.562533
Tspan14	0.561819
Selp	0.561521
Nphp4	0.561369
Spaca7	0.561324
Fat4	0.561141
Gm9733	0.560986
Ppp1r16b	0.560829
Clpb	0.560576
Ttc17	0.560433
Ppfia4	0.559911
Dclk1	0.559687
Omp	0.559652
Tfcp2l1	0.559585
Smim24	0.559226
Ret	0.558623
Ttc7	0.558009
Suox	0.55735
Psen1	0.557139
Rhbdf2	0.556862
Tacr1	0.556291
Il4ra	0.555834
Art2a-ps	0.555623
Hook2	0.555564
Pcdhgc3	0.555327
P2rx2	0.554878
Emb	0.554814
Slc12a7	0.55462
Hs3st1	0.554032
Cad	0.553732
Tlr13	0.552933
Srgn	0.552711
Tbx6	0.552442
Chchd10	0.55242
Nt5e	0.552374
Ccer2	0.552088
Pcdhb8	0.552088
Phex	0.552088
Madcam1	0.551927
Orc5	0.551896
Ddr1	0.551298
Col4a2	0.550948
Abcc3	0.550222
Ptgr1	0.550025
Krt7	0.550017
Ptpn22	0.549913
Mreg	0.549264
Fam101b	0.548801
Pgap1	0.548392
Abcg1	0.548225
Fras1	0.547954
Traf4	0.547907
Foxd4	0.547894
Abhd2	0.547823
Zfp526	0.547811
Tril	0.547775
Ano1	0.547204
Clip1	0.547069
Pfkl	0.545663
Cd82	0.545658
Tmem79	0.545625
Lgr4	0.545492
Ssh2	0.545211
Runx3	0.544822
Npy	0.544264
Icam4	0.544155
Tubb4a	0.543096
Ifrd2	0.542975
Tmem150b	0.542849
Lrrc8d	0.542743
Alg2	0.542644
Trank1	0.542551
Ms4a4a	0.542187
Inf2	0.541723
Polr1a	0.541489
Junb	0.541178
Erc1	0.540523
Eefsec	0.540235
Kif24	0.540215
Slc25a27	0.540126
Pxdn	0.539594
Sdc4	0.539514
Them6	0.539415
Ttll3	0.539109
Phf8	0.53907
Tprn	0.538443
Ticrr	0.538179
Sec14l2	0.537861
Trim72	0.537806
Tmbim6	0.537581
Mybph	0.53707
Lmo7	0.536889
Nsun3	0.536745
Xk	0.536254
Brwd3	0.536091
Cptp	0.535952
Col5a3	0.535612
Enpp5	0.535564
Strbp	0.535427
Gltscr1	0.535222
Oasl2	0.53474
Fzd5	0.53452
Zfp292	0.534414
Zdhhc18	0.533929
Tmem154	0.53276
Klf7	0.532688
Cyp2j6	0.532603
L1cam	0.531708
Parp14	0.531417
Slc43a2	0.530845
Btbd11	0.530825
Diaph1	0.53037
Serpine1	0.530112
Ddx58	0.529586
Frk	0.52935
Shisa2	0.529128
Hectd1	0.528374
Mgat4a	0.528127
Slc25a44	0.527394
Slc25a10	0.527006
Zc3hav1	0.526403
Rtl1	0.525923
Gm7030	0.525892
Thada	0.525406
Vmn1r53	0.525026
Slc6a17	0.524992
Cenpw	0.524512
Zfp319	0.524469
Tubb4b	0.523907
Krt4	0.523412
Pml	0.523219
Selplg	0.52315
Slc2a1	0.523036
Aplnr	0.522769
Wasf1	0.522636
Sntg1	0.52262
Iars	0.522552
Ptpn3	0.522408
Notch1	0.521674
Slfn9	0.521626
Gata4	0.521472
Efnb1	0.521299
Ccdc88b	0.521081
Ppp1r14a	0.520673
Hoxc6	0.52016
Fam171a2	0.519859
Mest	0.519417
Kcnrg	0.519304
Ccl3	0.519193
Qsox2	0.518387
C530008M17Rik	0.51838
Arhgap35	0.518306
Tmem180	0.518237
Shroom4	0.517933
Fat1	0.517863
Tigar	0.517582
Pnpla2	0.517175
Irgm2	0.515921
Foxp4	0.515821
Mlec	0.515763
Zfp516	0.515498
Kdm5c	0.515226
Vegfc	0.514999
Gjb3	0.514439
Prrc2a	0.514134
Tmem171	0.51403
Igsf6	0.513797
Neto2	0.513676
Arhgap5	0.513632
Epb41	0.51272
Stil	0.512234
Nr1d1	0.512129
Flrt1	0.512113
Bin2	0.512064
Mrgprf	0.511953
Zfp599	0.511807
Bcl9	0.511783
Cdh4	0.511555
Ptafr	0.510639
Gjb5	0.510258
Mcu	0.510217
Impg2	0.509877
Phf6	0.509586
Stxbp5l	0.509537
Afap1l2	0.509319
Scimp	0.508626
Sigirr	0.508032
Rin3	0.507929
Tigd3	0.507886
Cdc6	0.507503
B4galt5	0.506557
Ern1	0.506231
Atp7b	0.506064
Lgi4	0.505319
Orai1	0.504974
Dgcr2	0.504409
Dusp16	0.503729
Pabpc4l	0.503381
Ttll10	0.503148
Plk3	0.50294
Ccdc94	0.50284
Cdkn1a	0.502669
Galnt18	0.502514
Gch1	0.502328
Echdc3	0.502217
Tnfrsf23	0.501582
Btg2	0.501579
Mapk13	0.500875
Ctu1	0.500567
Mgst1	0.500552
Susd6	0.500213
Gstcd	0.499536
Zfp646	0.499394
Crispld2	0.499296
D8Ertd82e	0.499278
Mocs3	0.498199
Sbk1	0.498009
Fkbp4	0.497927
Plekhg6	0.497901
Gdpgp1	0.497589
Bcor	0.497576
Ikzf2	0.496766
Fam132b	0.496693
Catsper4	0.496693
Daw1	0.496693
Hist1h2bm	0.496693
Il4i1	0.496693
Zfp109	0.496341
Tlr9	0.496039
Znrf3	0.495859
Tmem41b	0.495752
Midn	0.49555
Adam8	0.495521
St3gal2	0.494961
Cpox	0.494663
E130012A19Rik	0.494641
Ambra1	0.494433
Hsd11b2	0.494364
Arhgap23	0.492983
Rhobtb2	0.492325
Tnfrsf9	0.492208
Vps13b	0.49219
Lurap1	0.491776
Hist1h2be	0.491565
Bcl11a	0.491254
Ifit3	0.490938
Eif6	0.490929
Klhdc1	0.490351
Prune	0.489449
Eva1c	0.48909
Asb11	0.488577
Cit	0.488391
Il6ra	0.48817
Exph5	0.487993
Tet3	0.487914
Gm10778	0.487722
Lgi2	0.4855
Syt11	0.485428
Car8	0.485217
Tmem245	0.48468
Oas2	0.484644
Ppp2r3a	0.484623
Hspa8	0.484322
Taf4b	0.48423
Slc9a8	0.484004
Nup133	0.483867
Dip2b	0.483602
Rlf	0.483524
Cdk19	0.483147
Dnaaf5	0.482997
Per1	0.482987
Gbp7	0.482659
Malt1	0.482521
Pcdhb5	0.482277
Jag2	0.482225
Tmem63a	0.481829
Mettl7a1	0.480719
Itga5	0.479982
Tor4a	0.479945
Fam73b	0.479855
Atp9a	0.47983
Cbr3	0.47921
Kifc1	0.479139
Plekha5	0.479109
Lpp	0.479051
Icmt	0.478631
Zc3h12d	0.478552
Cdc42ep5	0.477942
Suclg2	0.477933
Kctd7	0.477693
Mtss1l	0.477595
Hk2	0.477563
Zfp428	0.477537
Padi4	0.47736
Scn2b	0.47728
Tal1	0.477079
B4galt6	0.47685
Ncmap	0.47665
Gsr	0.476542
Ccnb1	0.476448
Unc13d	0.47644
Cxcl13	0.475681
Sesn2	0.475487
Wdr34	0.475471
Tapbpl	0.475379
Rictor	0.475134
Srd5a1	0.474878
Cep55	0.474868
Fam180a	0.47478
Iqsec1	0.474593
Fbxl7	0.474061
Gdap1l1	0.473968
G0s2	0.473637
Nlgn3	0.473084
Larp1	0.472999
Mospd3	0.472866
Flt4	0.472804
Tnfsf11	0.472501
Acaa2	0.472309
Col9a3	0.471949
Shmt1	0.471808
Papln	0.471622
N4bp1	0.471411
Myo18a	0.470825
Nktr	0.470807
Psat1	0.469853
Bcl2l13	0.469784
Slc27a4	0.469246
Pabpc1l	0.46833
Zbtb38	0.467773
Lgi3	0.467705
Pex26	0.4677
Aldh1l1	0.466917
Rorc	0.466635
Kctd11	0.466492
Srrm2	0.466361
Fnbp1l	0.465987
Glb1l3	0.465956
Gm12942	0.465806
Rasgef1b	0.465787
Slc7a4	0.465076
Cd300a	0.46471
Atp6v0a1	0.464701
Sox12	0.463868
Atg2b	0.463654
Gbp9	0.463638
Clec7a	0.463254
Eif4g1	0.463169
Zfyve26	0.462953
Ms4a4b	0.462738
Sema4b	0.462582
Sft2d2	0.462552
Hmmr	0.462414
Gse1	0.461999
Reln	0.46129
Gstm1	0.461136
Ephb4	0.461094
Myo1d	0.460956
Tgfbi	0.460843
Gareml	0.460738
Cntfr	0.460614
Pde4b	0.460605
Soga1	0.460504
Tmem63b	0.460396
Hcn2	0.460193
Fgd6	0.459926
Mllt3	0.459832
Ifitm3	0.459756
Efna4	0.459608
Cyp2d34	0.459599
Prkab1	0.459074
Psrc1	0.458327
Ovol2	0.458316
Card11	0.458232
Galm	0.45799
Cbl	0.457808
Tmem41a	0.457709
Tlr1	0.457257
Il16	0.456729
Sema4c	0.45642
Pqlc2	0.456355
Tet2	0.456119
Wisp1	0.456115
Acap1	0.456063
Adamts16	0.455827
Prkch	0.455371
Dok7	0.455231
Pcsk1n	0.455074
Cdca8	0.454965
Wasf2	0.454655
Dchs1	0.454512
Mavs	0.454363
Cdc25b	0.454307
Sh3bp4	0.454271
Pigu	0.454231
Pcid2	0.4533
Ubox5	0.453239
Zswim1	0.452955
Higd1b	0.452951
Crabp2	0.452915
Ctps	0.452751
Atp11b	0.452718
Ptprj	0.452524
Ltk	0.452424
Nat8l	0.452347
Cnnm3	0.452238
Satb2	0.452115
Cbfa2t3	0.451733
Galnt5	0.451678
Mysm1	0.451347
Rab20	0.451277
Pask	0.45102
Mki67	0.450994
Grina	0.450649
Vcam1	0.450448
Snd1	0.450078
Ripk4	0.449826
BC016579	0.449686
Fhdc1	0.449548
Bhlhe40	0.449188
Adi1	0.448794
Tor3a	0.448207
Spen	0.448088
Sqle	0.448026
Gadd45b	0.448006
Nup210	0.447918
Cyp7b1	0.447814
Ptpn4	0.447713
Stmn2	0.447618
Tagap	0.447579
Cyb561d1	0.447406
Mboat7	0.447202
Vstm5	0.447182
Xbp1	0.447052
Dsn1	0.446874
Ermp1	0.446762
Chrna1	0.446492
Irf7	0.446478
Dab2ip	0.446332
1700017B05Rik	0.446271
Lipk	0.446233
Casp7	0.446062
Krt17	0.446008
Fosl2	0.446
Hyal3	0.445795
Gfi1b	0.445773
Amot	0.445444
Errfi1	0.44536
Atf3	0.44532
Pex11g	0.445286
Dido1	0.445034
Eml4	0.444955
Ssbp3	0.444564
Adrb3	0.444536
Heyl	0.444481
Lama5	0.444383
Fut4	0.444377
Scn4a	0.443987
Uroc1	0.443987
Gbp3	0.443791
Ccdc97	0.443569
Ppp1r15a	0.443466
C5ar2	0.443262
Prrc2b	0.443045
Atp8b1	0.442758
Guca1a	0.442755
Odf2l	0.442659
Mkl2	0.442605
Hcfc1	0.442412
Tap1	0.442259
Dbp	0.442103
Mthfd1	0.441828
Dnajc16	0.441014
Arel1	0.440841
Rab17	0.44074
Atf7ip	0.440678
Adar	0.44055
Tctn2	0.44043
Dclk3	0.440248
Tpgs2	0.440034
Cdkn2a	0.439904
Eno1b	0.439895
Pira6	0.439868
Abcb4	0.439695
Zc3hav1l	0.43964
Scarb1	0.439533
Hyal2	0.438989
Narf	0.438777
Mpl	0.438385
9930111J21Rik1	0.4381
Igsf8	0.437521
Gtf2h3	0.437455
Mrvi1	0.437184
Fabp4	0.43688
Adipor2	0.436636
Slc35a2	0.436603
Gtf2h4	0.436588
Rcc2	0.436519
Gata6	0.435504
Gfpt1	0.434769
Sorbs2	0.434704
Ptprk	0.433353
Dnmbp	0.433199
Cpt1a	0.433091
Napsa	0.432875
Tmem184b	0.432359
Gprc5a	0.432322
Paqr4	0.432179
AI182371	0.432046
Dll4	0.431552
Gsdma2	0.431365
Nkx1-1	0.431365
Dopey2	0.431334
Glg1	0.430829
Ccl7	0.430503
Mpp2	0.43003
Fam171a1	0.430009
Rsph3b	0.429898
Hmgcll1	0.429557
Serpinb1a	0.428853
Scd2	0.428682
Mtus1	0.428392
Cyp2j9	0.428273
Prr12	0.42785
Smad3	0.426579
Prr11	0.426482
Adora2b	0.426341
Caskin2	0.425817
Sh3yl1	0.425695
Plxna3	0.425632
Nedd4l	0.425521
Lrp10	0.425509
Enpp4	0.425215
Smyd3	0.42502
Cd180	0.42454
Ppp1r10	0.424204
Tmem164	0.424182
Cdc42ep2	0.423982
Mgst3	0.423943
Syt12	0.42382
Tmem173	0.423278
Tufm	0.423203
Bzw2	0.422837
Zfp36l2	0.422715
C1rb	0.422169
Nfkbie	0.421926
Rnd1	0.421787
Tmem181a	0.421589
Ipp	0.421254
Pdyn	0.421228
Stk24	0.420899
Entpd6	0.420576
Tmem194	0.419871
Birc6	0.419487
2510039O18Rik	0.419413
Pigt	0.419308
Fbxo46	0.418831
Vars2	0.418761
Fos	0.418337
Slc7a5	0.418289
C8g	0.418279
Zfp691	0.417915
Bbx	0.417716
Sf3a2	0.417625
Trim30a	0.41747
Zbtb20	0.417364
Mctp2	0.417309
Slc16a10	0.417082
Ccnf	0.416957
Mrs2	0.416887
C2cd2	0.416437
Atp2a2	0.415657
Src	0.415514
Dync1h1	0.415303
Sema3b	0.41525
Epb41l4a	0.414344
Tmem201	0.41424
Ap1s3	0.413979
Zbtb21	0.413965
Tmem186	0.413625
Cd93	0.413622
Col17a1	0.413496
Farsb	0.413201
Arid3a	0.413113
Btbd17	0.413086
Muc6	0.412888
Alg9	0.412387
Cryab	0.41235
Foxc2	0.412268
Kat6a	0.41218
Ets1	0.412037
Kif15	0.411769
Patz1	0.411171
Akap3	0.411112
Cfap57	0.411112
Hspb3	0.411112
Il19	0.411112
Slc17a3	0.411112
Cds2	0.411004
Ckap4	0.410988
Grin1os	0.410531
Slc9a1	0.41037
Iglon5	0.410352
Ctnnd1	0.410352
Rpia	0.410295
Zbtb39	0.410223
Apcdd1	0.410187
Oas1a	0.410149
Dhx8	0.410033
Mmp13	0.410017
Myc	0.409311
Lmnb1	0.409108
Mocs1	0.408402
Jun	0.408265
Tuba4a	0.40808
Adgra2	0.408073
Ptprn2	0.407987
Lrrc24	0.407801
Gas1	0.407418
Atad5	0.406889
Cxx1a	0.406475
Rasgrf1	0.405814
Csf2ra	0.405441
Noct	0.405315
Fcgr4	0.405252
Pgap3	0.405185
Letm1	0.405089
Rnf113a2	0.404941
Vkorc1l1	0.40486
Rybp	0.404449
Kdm3a	0.404378
Zfp251	0.404236
Wnt7a	0.404106
Greb1l	0.403872
Aacs	0.403699
Tgtp1	0.402925
Synrg	0.40268
Ccdc166	0.402654
Diras2	0.40246
Acer2	0.402447
Chtf8	0.402403
Cadm4	0.402353
Fbxl14	0.40226
Uhrf1bp1	0.40226
Meis2	0.401928
Parp11	0.401312
Khnyn	0.401046
Rapgef2	0.400597
Tsku	0.400336
Dlgap5	0.400239
Fry	0.400051
Shtn1	0.399862
Ptprb	0.39976
Cdc42ep4	0.398986
Ppp1r3c	0.398919
Tbl2	0.398533
Slc16a6	0.398421
Atp11a	0.39828
Lpcat4	0.398205
Tjp2	0.397985
Rasl12	0.397943
Stk40	0.397911
Clca2	0.397541
Dock1	0.397514
Wdr72	0.397399
Cebpb	0.397389
Slco3a1	0.396905
Lrrc8c	0.39677
Cgnl1	0.396568
Hic1	0.396322
Bbc3	0.395919
Rhog	0.39556
Fasn	0.39544
Kif1b	0.395421
LOC100038947	0.395361
Mia	0.395359
Heatr6	0.395226
Oas1g	0.394937
Bcl2l1	0.394897
Ephx1	0.39477
Esm1	0.394546
Ecscr	0.394428
Enpep	0.39423
[truncated: 13,303 more rows]
