# Supplementary material for: Squamous trans-differentiation of pancreatic cancer cells promotes stromal inflammation
Source: eLife. 2020 Apr 24;9:e53381. doi: 10.7554/eLife.53381 (PMC7200154; doi:10.7554/eLife.53381)
Supplement: Supplementary file 4. — Tab-1 (cancer cell sort sig DOWN): List of 459 human genes significantly down regulated in the FACS-purified human cancer cell compartment of p63 knockout versus p63 positive KLM1 xenografts. Tab-2 (fibroblast sort sig DOWN): List of 396 mouse genes significantly down regulated in the FACS-purified mouse fibroblast compartment of p63 knockout versus p63 positive KLM1 xenografts. Tab-3 (immune sort sig DOWN): List of 463 mouse genes significantly down regulated in the FACS-purified mouse immune cell compartment of p63 knockout versus p63 positive KLM1 xenografts. Tab-4 (ranked cancer sgNEG vs sgTP63): Human genes ranked by their mean log2 fold change in the FACS-purified human cancer cell compartment of p63 knockout versus p63 positive KLM1 xenografts. Tab-5 (ranked CAFs sgNEG vs sgTP63): Mouse genes ranked by their mean log2 fold change in the FACS-purified mouse fibroblast compartment of p63 knockout versus p63 positive KLM1 xenografts. [file elife-53381-supp4.xlsx]

## Sheet: cancer cell sort sig DOWN
gene_id	locus	sample_1	sample_2	status	value_1	value_2	log2(fold_change)	test_stat	p_value	q_value	significant
SCGB1A1	chr11:62419034-62423206	sgNEG_sort1	sgTP63_sort1	OK	2255.28	83.7108	-4.75175	-10.1317	5e-05	0.00107673	yes
KRT4	chr12:52806542-52814116	sgNEG_sort1	sgTP63_sort1	OK	158.597	20.7679	-2.93294	-7.56535	5e-05	0.00107673	yes
PTPRZ1	chr7:121873104-122062036	sgNEG_sort1	sgTP63_sort1	OK	14.3767	1.65301	-3.12056	-6.67424	5e-05	0.00107673	yes
UPK1B	chr3:119173577-119205153	sgNEG_sort1	sgTP63_sort1	OK	36.8181	4.50829	-3.02976	-6.36505	5e-05	0.00107673	yes
MSMB	chr10:46033304-46046269	sgNEG_sort1	sgTP63_sort1	OK	190.777	17.4894	-3.44733	-6.24189	5e-05	0.00107673	yes
TIMP3	chr22:32508021-33058391	sgNEG_sort1	sgTP63_sort1	OK	11.9406	1.58104	-2.91693	-6.19528	5e-05	0.00107673	yes
KRT13	chr17:41500980-41505613	sgNEG_sort1	sgTP63_sort1	OK	163.318	33.7519	-2.27464	-5.95474	5e-05	0.00107673	yes
AQP3	chr9:33441153-33447633	sgNEG_sort1	sgTP63_sort1	OK	278.896	62.364	-2.16094	-5.4044	5e-05	0.00107673	yes
MMP10	chr11:102770501-102780628	sgNEG_sort1	sgTP63_sort1	OK	48.0647	10.7069	-2.16644	-5.23795	5e-05	0.00107673	yes
CEL	chr9:133061977-133071863	sgNEG_sort1	sgTP63_sort1	OK	41.3756	10.6801	-1.95385	-4.82476	5e-05	0.00107673	yes
HES2	chr1:6415231-6419919	sgNEG_sort1	sgTP63_sort1	OK	10.7208	2.33334	-2.19995	-4.67999	5e-05	0.00107673	yes
SOX2	chr3:181711923-181714436	sgNEG_sort1	sgTP63_sort1	OK	21.8716	5.32119	-2.03924	-4.64368	5e-05	0.00107673	yes
PIGR	chr1:206928521-206946466	sgNEG_sort1	sgTP63_sort1	OK	22.202	5.78491	-1.94032	-4.63387	5e-05	0.00107673	yes
KRT5	chr12:52514574-52520459	sgNEG_sort1	sgTP63_sort1	OK	441.213	109.574	-2.00957	-4.60519	5e-05	0.00107673	yes
CSTA	chr3:122325163-122341969	sgNEG_sort1	sgTP63_sort1	OK	63.9622	15.0482	-2.08763	-4.49108	5e-05	0.00107673	yes
CHP2	chr16:23754626-23758951	sgNEG_sort1	sgTP63_sort1	OK	5.49049	0.288093	-4.25233	-4.446	5e-05	0.00107673	yes
ROBO1	chr3:78597237-79767998	sgNEG_sort1	sgTP63_sort1	OK	7.91902	1.97696	-2.00203	-4.40011	5e-05	0.00107673	yes
SEMA3F	chr3:50154669-50189075	sgNEG_sort1	sgTP63_sort1	OK	22.8511	6.09686	-1.90612	-4.35345	5e-05	0.00107673	yes
KRT14	chr17:41582278-41586895	sgNEG_sort1	sgTP63_sort1	OK	39.5875	9.1948	-2.10615	-4.35273	5e-05	0.00107673	yes
SOSTDC1	chr7:16461480-16496513	sgNEG_sort1	sgTP63_sort1	OK	72.9368	23.3438	-1.64361	-4.31287	5e-05	0.00107673	yes
MIR205HG	chr1:209428819-209432552	sgNEG_sort1	sgTP63_sort1	OK	159.435	51.4347	-1.63216	-4.26951	5e-05	0.00107673	yes
LRP4	chr11:46854714-46918622	sgNEG_sort1	sgTP63_sort1	OK	4.95046	1.26587	-1.96743	-4.24071	5e-05	0.00107673	yes
MAOA	chrX:43654906-43746824	sgNEG_sort1	sgTP63_sort1	OK	10.6218	3.02891	-1.81016	-4.20109	5e-05	0.00107673	yes
S100A2	chr1:153561107-153565830	sgNEG_sort1	sgTP63_sort1	OK	154.956	52.4675	-1.56236	-4.17489	5e-05	0.00107673	yes
TFF3	chr21:42311666-42315596	sgNEG_sort1	sgTP63_sort1	OK	17.6283	2.352	-2.90593	-4.12556	5e-05	0.00107673	yes
TP63	chr3:189597114-189897279	sgNEG_sort1	sgTP63_sort1	OK	17.874	4.75752	-1.90958	-4.11289	5e-05	0.00107673	yes
DSC3	chr18:30989364-31042815	sgNEG_sort1	sgTP63_sort1	OK	5.4464	1.57394	-1.79092	-4.07206	5e-05	0.00107673	yes
FGFR3	chr4:1793298-1808872	sgNEG_sort1	sgTP63_sort1	OK	49.154	16.4838	-1.57626	-4.06251	5e-05	0.00107673	yes
MTSS1	chr8:124550769-124728507	sgNEG_sort1	sgTP63_sort1	OK	6.97732	1.75862	-1.98823	-4.04698	5e-05	0.00107673	yes
PNCK	chrX:153669722-153687568	sgNEG_sort1	sgTP63_sort1	OK	43.7143	10.8626	-2.00873	-4.0346	5e-05	0.00107673	yes
FAT2	chr5:151411343-151594822	sgNEG_sort1	sgTP63_sort1	OK	5.58798	0.816548	-2.77472	-4.00998	5e-05	0.00107673	yes
MMP14	chr14:22836532-22847600	sgNEG_sort1	sgTP63_sort1	OK	25.2522	8.72605	-1.53301	-3.98612	5e-05	0.00107673	yes
CXCL17	chr19:42428537-42443048	sgNEG_sort1	sgTP63_sort1	OK	258.708	97.4748	-1.40822	-3.84455	5e-05	0.00107673	yes
LRIG1	chr3:66133609-66501124	sgNEG_sort1	sgTP63_sort1	OK	20.5375	4.08442	-2.33006	-3.8055	5e-05	0.00107673	yes
NXPH4	chr12:57216794-57226449	sgNEG_sort1	sgTP63_sort1	OK	59.895	19.5314	-1.61664	-3.80289	5e-05	0.00107673	yes
KLHL13	chrX:117897812-118117340	sgNEG_sort1	sgTP63_sort1	OK	3.98532	0.481723	-3.04842	-3.80135	5e-05	0.00107673	yes
WNK2	chr9:93184155-93346414	sgNEG_sort1	sgTP63_sort1	OK	22.4115	8.32118	-1.42938	-3.79426	5e-05	0.00107673	yes
PTN	chr7:137227340-137343865	sgNEG_sort1	sgTP63_sort1	OK	6.7012	0.634448	-3.40085	-3.7884	5e-05	0.00107673	yes
SLC1A3	chr5:36606354-36688334	sgNEG_sort1	sgTP63_sort1	OK	11.7232	3.69385	-1.66617	-3.75329	5e-05	0.00107673	yes
NUPR1	chr16:28537340-28539174	sgNEG_sort1	sgTP63_sort1	OK	82.9885	28.2311	-1.55562	-3.72484	5e-05	0.00107673	yes
NUAK1	chr12:106063346-106140033	sgNEG_sort1	sgTP63_sort1	OK	3.76154	1.02036	-1.88225	-3.6882	5e-05	0.00107673	yes
SLC6A8	chrX:153688296-153696593	sgNEG_sort1	sgTP63_sort1	OK	39.7635	15.5084	-1.3584	-3.66399	5e-05	0.00107673	yes
GSTA1	chr6:52791379-52803967	sgNEG_sort1	sgTP63_sort1	OK	17.6623	4.50445	-1.97125	-3.61909	5e-05	0.00107673	yes
RAPGEFL1	chr17:40177009-40195656	sgNEG_sort1	sgTP63_sort1	OK	22.6588	7.78971	-1.54043	-3.61103	5e-05	0.00107673	yes
TMEM246	chr9:101473157-101487221	sgNEG_sort1	sgTP63_sort1	OK	3.67799	0.81887	-2.16721	-3.58314	5e-05	0.00107673	yes
SPINK5	chr5:148063971-148137362	sgNEG_sort1	sgTP63_sort1	OK	12.9203	4.35525	-1.56882	-3.56522	5e-05	0.00107673	yes
RAB38	chr11:87809489-88175505	sgNEG_sort1	sgTP63_sort1	OK	35.3467	12.0248	-1.55556	-3.54286	5e-05	0.00107673	yes
BMP7	chr20:57168752-57266651	sgNEG_sort1	sgTP63_sort1	OK	5.9794	1.74395	-1.77764	-3.46744	5e-05	0.00107673	yes
PTPN13	chr4:86594306-86815179	sgNEG_sort1	sgTP63_sort1	OK	13.8445	5.67938	-1.2855	-3.46121	5e-05	0.00107673	yes
ACKR3	chr2:236537130-236582358	sgNEG_sort1	sgTP63_sort1	OK	7.47897	1.65267	-2.17804	-3.45451	5e-05	0.00107673	yes
PLS3	chrX:115560849-115650861	sgNEG_sort1	sgTP63_sort1	OK	74.7866	31.4233	-1.25094	-3.44353	5e-05	0.00107673	yes
AGR2	chr7:16791810-16805114	sgNEG_sort1	sgTP63_sort1	OK	1441.73	495.462	-1.54096	-3.42298	5e-05	0.00107673	yes
SDC1	chr2:20200796-20225433	sgNEG_sort1	sgTP63_sort1	OK	155.066	62.2908	-1.31579	-3.40543	5e-05	0.00107673	yes
SOX21	chr13:94709621-94712543	sgNEG_sort1	sgTP63_sort1	OK	13.6127	4.87967	-1.4801	-3.38496	5e-05	0.00107673	yes
SNAI2	chr8:48917676-48921440	sgNEG_sort1	sgTP63_sort1	OK	5.65933	1.13585	-2.31685	-3.38163	5e-05	0.00107673	yes
KIAA1324	chr1:109113962-109206781	sgNEG_sort1	sgTP63_sort1	OK	24.0456	8.88688	-1.43603	-3.34839	5e-05	0.00107673	yes
CLCA2	chr1:86424085-86456558	sgNEG_sort1	sgTP63_sort1	OK	3.43753	0.613943	-2.4852	-3.34665	5e-05	0.00107673	yes
WLS	chr1:68098458-68233000	sgNEG_sort1	sgTP63_sort1	OK	14.8169	4.94038	-1.58455	-3.31748	5e-05	0.00107673	yes
WNT5B	chr12:1617055-1647212	sgNEG_sort1	sgTP63_sort1	OK	14.5542	4.99441	-1.54304	-3.30769	5e-05	0.00107673	yes
ADH1C	chr4:99336491-99353045	sgNEG_sort1	sgTP63_sort1	OK	7.08679	1.40156	-2.3381	-3.30686	5e-05	0.00107673	yes
FGFR2	chr10:121478329-121598656	sgNEG_sort1	sgTP63_sort1	OK	6.30376	1.94609	-1.69564	-3.29108	5e-05	0.00107673	yes
DUOX1	chr15:45129993-45165578	sgNEG_sort1	sgTP63_sort1	OK	5.69276	1.81784	-1.6469	-3.28806	5e-05	0.00107673	yes
SLITRK6	chr13:85792786-85799348	sgNEG_sort1	sgTP63_sort1	OK	27.7482	11.632	-1.2543	-3.28323	5e-05	0.00107673	yes
BMPR1B	chr4:94757976-95158453	sgNEG_sort1	sgTP63_sort1	OK	3.91706	1.20557	-1.70006	-3.25134	5e-05	0.00107673	yes
CLEC2B	chr12:9852368-9869859	sgNEG_sort1	sgTP63_sort1	OK	14.3161	4.5106	-1.66624	-3.25022	5e-05	0.00107673	yes
MARK1	chr1:220528182-220664457	sgNEG_sort1	sgTP63_sort1	OK	3.89291	1.04609	-1.89584	-3.24697	5e-05	0.00107673	yes
COL27A1	chr9:114154270-114312516	sgNEG_sort1	sgTP63_sort1	OK	7.48413	2.78319	-1.4271	-3.24681	5e-05	0.00107673	yes
MMP12	chr11:102862728-102875034	sgNEG_sort1	sgTP63_sort1	OK	5.28541	0.894428	-2.56298	-3.2466	5e-05	0.00107673	yes
ST6GALNAC1	chr17:76617768-76643838	sgNEG_sort1	sgTP63_sort1	OK	39.6558	16.1924	-1.29221	-3.20921	5e-05	0.00107673	yes
GJA1	chr6:121435576-121449744	sgNEG_sort1	sgTP63_sort1	OK	12.7068	4.71301	-1.43089	-3.20032	5e-05	0.00107673	yes
NGFR	chr17:49495292-49515020	sgNEG_sort1	sgTP63_sort1	OK	6.34851	1.98714	-1.67572	-3.18521	5e-05	0.00107673	yes
NECTIN1	chr11:119638097-119728725	sgNEG_sort1	sgTP63_sort1	OK	55.559	22.7574	-1.28769	-3.14389	5e-05	0.00107673	yes
JPH1	chr8:74234699-74321545	sgNEG_sort1	sgTP63_sort1	OK	4.15716	1.26688	-1.71432	-3.09907	5e-05	0.00107673	yes
GPC3	chrX:133535744-133985646	sgNEG_sort1	sgTP63_sort1	OK	7.34357	1.76089	-2.06018	-3.09622	5e-05	0.00107673	yes
PCSK9	chr1:55039475-55064853	sgNEG_sort1	sgTP63_sort1	OK	6.08311	2.04916	-1.56978	-3.08994	5e-05	0.00107673	yes
VWF	chr12:5948873-6124675	sgNEG_sort1	sgTP63_sort1	OK	2.60609	0.912671	-1.51372	-3.0671	5e-05	0.00107673	yes
IL1A	chr2:112773914-112785398	sgNEG_sort1	sgTP63_sort1	OK	2.43504	0.378512	-2.68553	-3.0333	5e-05	0.00107673	yes
ANKRD35	chr1:145866559-145885866	sgNEG_sort1	sgTP63_sort1	OK	5.01739	1.54736	-1.69713	-3.03276	5e-05	0.00107673	yes
CA8	chr8:60185419-60281423	sgNEG_sort1	sgTP63_sort1	OK	4.47319	0.860317	-2.37837	-3.0127	5e-05	0.00107673	yes
BCL11A	chr2:60451166-60553498	sgNEG_sort1	sgTP63_sort1	OK	3.42641	0.609647	-2.49065	-3.00708	5e-05	0.00107673	yes
TNNT3	chr11:1919550-1938706	sgNEG_sort1	sgTP63_sort1	OK	9.32261	1.01686	-3.19661	-3.00689	5e-05	0.00107673	yes
DEGS2	chr14:100146415-100166886	sgNEG_sort1	sgTP63_sort1	OK	20.3348	7.35243	-1.46766	-3.00132	5e-05	0.00107673	yes
F5	chr1:169511953-169586632	sgNEG_sort1	sgTP63_sort1	OK	2.75792	0.985064	-1.48529	-2.99429	5e-05	0.00107673	yes
SCD5	chr4:82629536-82798857	sgNEG_sort1	sgTP63_sort1	OK	5.04107	1.54902	-1.70238	-2.96624	5e-05	0.00107673	yes
AJUBA	chr14:22971173-22982642	sgNEG_sort1	sgTP63_sort1	OK	6.26545	2.19363	-1.51409	-2.95962	5e-05	0.00107673	yes
UPK3BL	chr7:102636747-102671729	sgNEG_sort1	sgTP63_sort1	OK	84.9984	36.2916	-1.2278	-2.95933	5e-05	0.00107673	yes
ATP1B3	chr3:141876627-141926540	sgNEG_sort1	sgTP63_sort1	OK	88.8045	42.3455	-1.06842	-2.95823	5e-05	0.00107673	yes
PRKX	chrX:3604342-3713634	sgNEG_sort1	sgTP63_sort1	OK	3.7197	1.38738	-1.42282	-2.91928	5e-05	0.00107673	yes
CEBPA	chr19:33299933-33302564	sgNEG_sort1	sgTP63_sort1	OK	15.4453	6.59598	-1.22751	-2.89949	5e-05	0.00107673	yes
UST	chr6:148745890-149076990	sgNEG_sort1	sgTP63_sort1	OK	4.38725	1.50277	-1.5457	-2.89947	5e-05	0.00107673	yes
GYLTL1B	chr11:45921620-45929096	sgNEG_sort1	sgTP63_sort1	OK	9.77311	3.09872	-1.65715	-2.86898	5e-05	0.00107673	yes
LEFTY1	chr1:225886281-225889146	sgNEG_sort1	sgTP63_sort1	OK	6.30235	1.52658	-2.04559	-2.85755	5e-05	0.00107673	yes
DAPL1	chr2:158795316-158815985	sgNEG_sort1	sgTP63_sort1	OK	17.0069	2.95153	-2.52659	-2.85638	5e-05	0.00107673	yes
MID1	chrX:10445309-11111264	sgNEG_sort1	sgTP63_sort1	OK	9.6551	4.34804	-1.15093	-2.8495	5e-05	0.00107673	yes
KIT	chr4:54657927-54740715	sgNEG_sort1	sgTP63_sort1	OK	2.59335	0.759879	-1.77097	-2.84886	5e-05	0.00107673	yes
CROT	chr7:87345634-87475864	sgNEG_sort1	sgTP63_sort1	OK	13.7342	5.36973	-1.35485	-2.83734	5e-05	0.00107673	yes
HCAR3	chr12:122714755-122716892	sgNEG_sort1	sgTP63_sort1	OK	17.8634	7.57689	-1.23733	-2.83396	5e-05	0.00107673	yes
FAM13A	chr4:88725953-89111398	sgNEG_sort1	sgTP63_sort1	OK	17.4525	7.99365	-1.1265	-2.83078	5e-05	0.00107673	yes
CYP2J2	chr1:59893307-59926798	sgNEG_sort1	sgTP63_sort1	OK	5.24764	1.37183	-1.93557	-2.81854	5e-05	0.00107673	yes
GPNMB	chr7:23246205-23275110	sgNEG_sort1	sgTP63_sort1	OK	235.787	109.282	-1.10944	-2.80963	5e-05	0.00107673	yes
TSPAN5	chr4:98470366-98658661	sgNEG_sort1	sgTP63_sort1	OK	10.8106	4.6763	-1.20901	-2.8081	5e-05	0.00107673	yes
COL4A5	chrX:108439843-108697545	sgNEG_sort1	sgTP63_sort1	OK	10.5272	4.91744	-1.09815	-2.78815	5e-05	0.00107673	yes
MCTP2	chr15:94231183-94483952	sgNEG_sort1	sgTP63_sort1	OK	5.33058	1.59673	-1.73917	-2.77424	5e-05	0.00107673	yes
INTS6L	chrX:135520629-135582535	sgNEG_sort1	sgTP63_sort1	OK	10.4918	4.62895	-1.18051	-2.76921	5e-05	0.00107673	yes
BPIFB1	chr20:33283134-33309878	sgNEG_sort1	sgTP63_sort1	OK	9.19875	3.13343	-1.5537	-2.76543	5e-05	0.00107673	yes
METTL7A	chr12:50923810-50932517	sgNEG_sort1	sgTP63_sort1	OK	25.3721	12.503	-1.02097	-2.74042	5e-05	0.00107673	yes
ADAMTS1	chr21:26836286-26845409	sgNEG_sort1	sgTP63_sort1	OK	2.82686	0.861509	-1.71426	-2.73485	5e-05	0.00107673	yes
EFS	chr14:23356399-23365633	sgNEG_sort1	sgTP63_sort1	OK	9.42646	3.8573	-1.28913	-2.7257	5e-05	0.00107673	yes
SOX7	chr8:10723767-10730574	sgNEG_sort1	sgTP63_sort1	OK	8.31016	3.473	-1.25869	-2.72083	5e-05	0.00107673	yes
GNAI1	chr7:80134823-80219409	sgNEG_sort1	sgTP63_sort1	OK	12.001	5.37923	-1.15769	-2.71822	5e-05	0.00107673	yes
PTGS2	chr1:186671811-186680427	sgNEG_sort1	sgTP63_sort1	OK	10.7647	5.04376	-1.09373	-2.70088	5e-05	0.00107673	yes
TMEM168	chr7:112762381-112790713	sgNEG_sort1	sgTP63_sort1	OK	14.3227	6.89125	-1.05547	-2.69457	5e-05	0.00107673	yes
EGFR	chr7:55019031-55207338	sgNEG_sort1	sgTP63_sort1	OK	23.5194	11.7474	-1.00151	-2.69224	5e-05	0.00107673	yes
BAALC	chr8:103140692-103230305	sgNEG_sort1	sgTP63_sort1	OK	3.01826	0.767037	-1.97635	-2.67077	5e-05	0.00107673	yes
SUSD4	chr1:223220818-223364240	sgNEG_sort1	sgTP63_sort1	OK	16.6559	5.96363	-1.48177	-2.66703	5e-05	0.00107673	yes
SALL4	chr20:51782716-51802523	sgNEG_sort1	sgTP63_sort1	OK	9.51813	4.27812	-1.1537	-2.66534	5e-05	0.00107673	yes
CX3CL1	chr16:57372460-57385048	sgNEG_sort1	sgTP63_sort1	OK	62.642	31.157	-1.00757	-2.65676	5e-05	0.00107673	yes
OLR1	chr12:10158299-10191804	sgNEG_sort1	sgTP63_sort1	OK	3.96222	0.761932	-2.37858	-2.65153	5e-05	0.00107673	yes
EFNB1	chrX:68828996-68842164	sgNEG_sort1	sgTP63_sort1	OK	8.73436	3.81588	-1.19469	-2.63633	5e-05	0.00107673	yes
RASSF9	chr12:85800702-85836540	sgNEG_sort1	sgTP63_sort1	OK	14.4636	5.86518	-1.30218	-2.62928	5e-05	0.00107673	yes
FERMT1	chr20:6074844-6123544	sgNEG_sort1	sgTP63_sort1	OK	8.44756	4.00051	-1.07835	-2.62321	5e-05	0.00107673	yes
CXCL1	chr4:73869391-73871302	sgNEG_sort1	sgTP63_sort1	OK	24.7107	10.3849	-1.25065	-2.60859	5e-05	0.00107673	yes
GCNT3	chr15:59611782-59620011	sgNEG_sort1	sgTP63_sort1	OK	24.6075	11.8494	-1.05428	-2.6054	5e-05	0.00107673	yes
CLDN1	chr3:190305700-190322446	sgNEG_sort1	sgTP63_sort1	OK	28.031	14.2492	-0.976146	-2.59853	5e-05	0.00107673	yes
LRMP	chr12:25052100-25195177	sgNEG_sort1	sgTP63_sort1	OK	14.4352	3.37359	-2.09724	-2.59125	5e-05	0.00107673	yes
SERPINF1	chr17:1761964-1777565	sgNEG_sort1	sgTP63_sort1	OK	25.2267	11.4678	-1.13736	-2.58165	5e-05	0.00107673	yes
S1PR5	chr19:10512741-10517992	sgNEG_sort1	sgTP63_sort1	OK	6.68859	2.52174	-1.40728	-2.57896	5e-05	0.00107673	yes
ETS2	chr21:38805306-38824955	sgNEG_sort1	sgTP63_sort1	OK	34.6003	17.7307	-0.964537	-2.56987	5e-05	0.00107673	yes
PKP1	chr1:201283451-201332993	sgNEG_sort1	sgTP63_sort1	OK	22.4763	11.5033	-0.966352	-2.56252	5e-05	0.00107673	yes
GPRC5B	chr16:19858970-19886045	sgNEG_sort1	sgTP63_sort1	OK	19.985	10.0837	-0.986888	-2.55292	5e-05	0.00107673	yes
PRSS12	chr4:118280037-118353042	sgNEG_sort1	sgTP63_sort1	OK	2.98253	0.951491	-1.64827	-2.54987	5e-05	0.00107673	yes
VEGFA	chr6:43770208-43786487	sgNEG_sort1	sgTP63_sort1	OK	134.158	63.6308	-1.07613	-2.54491	5e-05	0.00107673	yes
TSPAN9	chr12:3077354-3286564	sgNEG_sort1	sgTP63_sort1	OK	45.4317	20.7601	-1.12988	-2.53717	5e-05	0.00107673	yes
GGT6	chr17:4556926-4560596	sgNEG_sort1	sgTP63_sort1	OK	27.0374	13.5424	-0.997476	-2.52934	5e-05	0.00107673	yes
ANKRD65	chr1:1418419-1422561	sgNEG_sort1	sgTP63_sort1	OK	19.2824	8.52815	-1.17698	-2.51571	5e-05	0.00107673	yes
AUTS2	chr7:69598474-70793068	sgNEG_sort1	sgTP63_sort1	OK	3.44671	1.3082	-1.39763	-2.51474	5e-05	0.00107673	yes
GPR161	chr1:168079541-168137667	sgNEG_sort1	sgTP63_sort1	OK	3.02736	1.31037	-1.20809	-2.51328	5e-05	0.00107673	yes
RERG	chr12:15107781-15221803	sgNEG_sort1	sgTP63_sort1	OK	21.5905	10.7296	-1.0088	-2.48017	5e-05	0.00107673	yes
CNKSR3	chr6:154405298-154510619	sgNEG_sort1	sgTP63_sort1	OK	5.24408	2.11084	-1.31287	-2.47891	5e-05	0.00107673	yes
HCAR2	chr12:122701292-122703357	sgNEG_sort1	sgTP63_sort1	OK	60.773	32.3006	-0.91187	-2.47872	5e-05	0.00107673	yes
COL7A1	chr3:48564072-48595302	sgNEG_sort1	sgTP63_sort1	OK	53.1782	26.8583	-0.985467	-2.46744	5e-05	0.00107673	yes
BCAM	chr19:44809058-44821421	sgNEG_sort1	sgTP63_sort1	OK	47.5721	25.4388	-0.903086	-2.46425	5e-05	0.00107673	yes
MPPED2	chr11:30384492-30586713	sgNEG_sort1	sgTP63_sort1	OK	2.04994	0.31102	-2.7205	-2.455	5e-05	0.00107673	yes
SCPEP1	chr17:56978106-57006768	sgNEG_sort1	sgTP63_sort1	OK	91.7902	49.6135	-0.887607	-2.45169	5e-05	0.00107673	yes
COLCA1	chr11:111293388-111308735	sgNEG_sort1	sgTP63_sort1	OK	3.56553	1.12343	-1.66621	-2.44943	5e-05	0.00107673	yes
FEZ1	chr11:125445744-125499526	sgNEG_sort1	sgTP63_sort1	OK	9.41064	3.7222	-1.33814	-2.42813	5e-05	0.00107673	yes
CERS3	chr15:100400394-100544982	sgNEG_sort1	sgTP63_sort1	OK	3.53995	1.39068	-1.34794	-2.41251	5e-05	0.00107673	yes
PLXNA2	chr1:208022241-208244384	sgNEG_sort1	sgTP63_sort1	OK	10.2955	5.4933	-0.906271	-2.38411	5e-05	0.00107673	yes
PADI3	chr1:17249078-17284233	sgNEG_sort1	sgTP63_sort1	OK	83.9637	45.8484	-0.872893	-2.38191	5e-05	0.00107673	yes
PAX7	chr1:18631005-18748866	sgNEG_sort1	sgTP63_sort1	OK	3.36514	1.34625	-1.32171	-2.37236	5e-05	0.00107673	yes
CFI	chr4:109731220-109802225	sgNEG_sort1	sgTP63_sort1	OK	12.5494	5.63945	-1.15399	-2.37197	5e-05	0.00107673	yes
MERTK	chr2:111898478-112039946	sgNEG_sort1	sgTP63_sort1	OK	5.02832	2.07884	-1.2743	-2.37128	5e-05	0.00107673	yes
LPAR1	chr9:110873251-111039259	sgNEG_sort1	sgTP63_sort1	OK	5.52707	2.38571	-1.2121	-2.37027	5e-05	0.00107673	yes
RGS16	chr1:182598622-182604413	sgNEG_sort1	sgTP63_sort1	OK	13.8099	6.7405	-1.03478	-2.36949	5e-05	0.00107673	yes
GALNT7	chr4:173168752-173323967	sgNEG_sort1	sgTP63_sort1	OK	29.9831	16.57	-0.855579	-2.35878	5e-05	0.00107673	yes
SELENBP1	chr1:151364301-151372734	sgNEG_sort1	sgTP63_sort1	OK	39.4333	20.6968	-0.930002	-2.35579	5e-05	0.00107673	yes
CALML3	chr10:5524888-5526268	sgNEG_sort1	sgTP63_sort1	OK	2.60712	0.48728	-2.41963	-2.35389	0.0003	0.00507835	yes
COL9A2	chr1:40300486-40317653	sgNEG_sort1	sgTP63_sort1	OK	21.3967	11.4396	-0.903349	-2.35172	5e-05	0.00107673	yes
SOD3	chr4:24795462-24800845	sgNEG_sort1	sgTP63_sort1	OK	5.35426	1.73677	-1.62429	-2.33184	5e-05	0.00107673	yes
IGFBP4	chr17:40443423-40457730	sgNEG_sort1	sgTP63_sort1	OK	105.055	58.433	-0.84629	-2.331	5e-05	0.00107673	yes
UGT1A6	chr2:233617644-233773305	sgNEG_sort1	sgTP63_sort1	OK	29.3562	9.73384	-1.59258	-2.30489	0.00055	0.00829216	yes
HSD17B2	chr16:82035252-82098534	sgNEG_sort1	sgTP63_sort1	OK	2.53141	0.343988	-2.87951	-2.29998	0.00115	0.0154252	yes
BBOX1	chr11:27040704-27127807	sgNEG_sort1	sgTP63_sort1	OK	5.46708	1.97505	-1.46888	-2.28491	5e-05	0.00107673	yes
CLU	chr8:27596916-27616717	sgNEG_sort1	sgTP63_sort1	OK	80.8362	44.0185	-0.876892	-2.26345	5e-05	0.00107673	yes
CA9	chr9:35673917-35681159	sgNEG_sort1	sgTP63_sort1	OK	6.09503	2.1464	-1.50571	-2.25582	5e-05	0.00107673	yes
C2orf72	chr2:231037565-231049714	sgNEG_sort1	sgTP63_sort1	OK	6.57787	3.15814	-1.05854	-2.25322	5e-05	0.00107673	yes
SAGE1	chrX:135893606-135913061	sgNEG_sort1	sgTP63_sort1	OK	28.3875	15.3455	-0.88744	-2.24639	5e-05	0.00107673	yes
DHCR24	chr1:54849626-54887248	sgNEG_sort1	sgTP63_sort1	OK	150.85	81.2328	-0.892978	-2.24529	5e-05	0.00107673	yes
SLPI	chr20:45252238-45254564	sgNEG_sort1	sgTP63_sort1	OK	1111.68	614.41	-0.855474	-2.23795	5e-05	0.00107673	yes
GRIK2	chr6:101393707-102070083	sgNEG_sort1	sgTP63_sort1	OK	5.65971	2.65613	-1.0914	-2.23625	0.0001	0.00200796	yes
PDIA4	chr7:149003053-149028690	sgNEG_sort1	sgTP63_sort1	OK	241.171	128.641	-0.906711	-2.2325	5e-05	0.00107673	yes
SLC16A2	chrX:74421492-74533929	sgNEG_sort1	sgTP63_sort1	OK	5.884	2.88543	-1.02801	-2.22337	5e-05	0.00107673	yes
OLFML2A	chr9:124777157-124814891	sgNEG_sort1	sgTP63_sort1	OK	5.80786	2.99453	-0.955676	-2.22201	5e-05	0.00107673	yes
TTYH3	chr7:2631968-2664802	sgNEG_sort1	sgTP63_sort1	OK	38.6721	21.8563	-0.823241	-2.22023	5e-05	0.00107673	yes
KCTD15	chr19:33795539-33815761	sgNEG_sort1	sgTP63_sort1	OK	10.8261	5.60109	-0.950729	-2.21935	5e-05	0.00107673	yes
OXGR1	chr13:96985718-96995842	sgNEG_sort1	sgTP63_sort1	OK	2.24907	0.616317	-1.86759	-2.2144	0.0001	0.00200796	yes
PIK3C2G	chr12:18242945-18738059	sgNEG_sort1	sgTP63_sort1	OK	2.65234	0.986155	-1.42738	-2.20688	5e-05	0.00107673	yes
FAM3D	chr3:58633942-58666843	sgNEG_sort1	sgTP63_sort1	OK	4.46966	1.2195	-1.87387	-2.20609	5e-05	0.00107673	yes
PTK7	chr6:43076267-43161720	sgNEG_sort1	sgTP63_sort1	OK	16.5426	9.25194	-0.838363	-2.20414	5e-05	0.00107673	yes
TAGLN	chr11:117199323-117204792	sgNEG_sort1	sgTP63_sort1	OK	70.4733	38.2653	-0.88104	-2.20023	5e-05	0.00107673	yes
MYCL	chr1:39895423-39902015	sgNEG_sort1	sgTP63_sort1	OK	6.27491	2.87476	-1.12615	-2.19942	0.00015	0.00283727	yes
MYBPC1	chr12:101594848-101695841	sgNEG_sort1	sgTP63_sort1	OK	3.35734	1.38407	-1.2784	-2.1928	5e-05	0.00107673	yes
VTCN1	chr1:117143586-117210992	sgNEG_sort1	sgTP63_sort1	OK	33.111	18.6916	-0.824917	-2.1902	5e-05	0.00107673	yes
EDARADD	chr1:236394379-236484708	sgNEG_sort1	sgTP63_sort1	OK	8.31637	4.08434	-1.02585	-2.18242	5e-05	0.00107673	yes
SH3RF2	chr5:145936562-146081773	sgNEG_sort1	sgTP63_sort1	OK	7.07903	3.54245	-0.998803	-2.17196	5e-05	0.00107673	yes
SLC39A2	chr14:20999254-21001875	sgNEG_sort1	sgTP63_sort1	OK	13.6855	6.261	-1.12818	-2.16304	0.0001	0.00200796	yes
CRISP3	chr6:49727375-49744455	sgNEG_sort1	sgTP63_sort1	OK	6.10857	2.62859	-1.21655	-2.15477	0.0001	0.00200796	yes
TIPARP	chr3:156674415-156706770	sgNEG_sort1	sgTP63_sort1	OK	23.8547	13.5723	-0.813612	-2.15435	5e-05	0.00107673	yes
WNT3A	chr1:228007021-228067113	sgNEG_sort1	sgTP63_sort1	OK	2.345	0.809377	-1.53471	-2.15144	0.0002	0.00364387	yes
COBLL1	chr2:164680184-164842168	sgNEG_sort1	sgTP63_sort1	OK	2.94953	1.5201	-0.956315	-2.14847	5e-05	0.00107673	yes
COLCA2	chr11:111293388-111308735	sgNEG_sort1	sgTP63_sort1	OK	16.0478	5.5535	-1.53091	-2.14143	5e-05	0.00107673	yes
DEPTOR	chr8:119873654-120056202	sgNEG_sort1	sgTP63_sort1	OK	3.26207	1.19521	-1.44853	-2.13863	5e-05	0.00107673	yes
AASS	chr7:122073543-122144290	sgNEG_sort1	sgTP63_sort1	OK	2.51416	1.12928	-1.15467	-2.1337	5e-05	0.00107673	yes
CD302	chr2:159768627-159904756	sgNEG_sort1	sgTP63_sort1	OK	4.28849	1.72448	-1.31431	-2.13194	0.0004	0.00640623	yes
CLDND1	chr3:98515472-98523066	sgNEG_sort1	sgTP63_sort1	OK	30.8028	17.6716	-0.801627	-2.12653	5e-05	0.00107673	yes
SLC15A2	chr3:121894323-121944187	sgNEG_sort1	sgTP63_sort1	OK	7.53639	3.84869	-0.969505	-2.11868	0.0001	0.00200796	yes
SPOCK3	chr4:166733383-167234869	sgNEG_sort1	sgTP63_sort1	OK	4.02694	1.25885	-1.67758	-2.11744	5e-05	0.00107673	yes
PIK3R1	chr5:68215736-68301821	sgNEG_sort1	sgTP63_sort1	OK	6.68188	3.62295	-0.88309	-2.11573	0.0003	0.00507835	yes
GM2A	chr5:151253051-151270394	sgNEG_sort1	sgTP63_sort1	OK	32.7971	18.7887	-0.803708	-2.109	5e-05	0.00107673	yes
RNF144B	chr6:18387328-18468874	sgNEG_sort1	sgTP63_sort1	OK	6.35094	3.36584	-0.916002	-2.10834	5e-05	0.00107673	yes
RNF128	chrX:106693837-106797016	sgNEG_sort1	sgTP63_sort1	OK	3.17949	1.17722	-1.43342	-2.10538	0.0002	0.00364387	yes
STON2	chr14:81260649-81427404	sgNEG_sort1	sgTP63_sort1	OK	2.59189	1.07231	-1.27328	-2.10343	0.00015	0.00283727	yes
VIT	chr2:36696684-36814794	sgNEG_sort1	sgTP63_sort1	OK	2.55134	0.687622	-1.89157	-2.10257	0.00055	0.00829216	yes
TMEM52B	chr12:10158299-10191804	sgNEG_sort1	sgTP63_sort1	OK	2.52411	0.541157	-2.22166	-2.10183	5e-05	0.00107673	yes
MARC1	chr1:220786696-220814399	sgNEG_sort1	sgTP63_sort1	OK	6.83678	2.95036	-1.21243	-2.09628	5e-05	0.00107673	yes
CSF1	chr1:109910505-109930994	sgNEG_sort1	sgTP63_sort1	OK	8.15726	4.26207	-0.936529	-2.09168	5e-05	0.00107673	yes
POF1B	chrX:85277388-85379743	sgNEG_sort1	sgTP63_sort1	OK	11.1042	5.37971	-1.0455	-2.09026	5e-05	0.00107673	yes
HPGD	chr4:174490176-174522898	sgNEG_sort1	sgTP63_sort1	OK	4.26756	1.81992	-1.22954	-2.08796	0.00015	0.00283727	yes
HSPA4L	chr4:127781820-127834073	sgNEG_sort1	sgTP63_sort1	OK	3.90143	1.76265	-1.14626	-2.08548	0.00035	0.0057856	yes
TCF7L1	chr2:85133459-85310388	sgNEG_sort1	sgTP63_sort1	OK	6.86835	3.30156	-1.05682	-2.08291	0.0001	0.00200796	yes
ARL4D	chr17:43398984-43401136	sgNEG_sort1	sgTP63_sort1	OK	19.4942	10.3764	-0.909739	-2.06808	5e-05	0.00107673	yes
SLCO4C1	chr5:102233985-102296549	sgNEG_sort1	sgTP63_sort1	OK	2.31172	0.994997	-1.21621	-2.0665	0.00025	0.00439323	yes
ADGRF5	chr6:46852504-46954954	sgNEG_sort1	sgTP63_sort1	OK	3.19087	1.50253	-1.08656	-2.06532	0.0001	0.00200796	yes
CYP4X1	chr1:46961363-47055432	sgNEG_sort1	sgTP63_sort1	OK	11.8566	5.97314	-0.989126	-2.05957	5e-05	0.00107673	yes
SESN3	chr11:95165512-95232541	sgNEG_sort1	sgTP63_sort1	OK	6.13865	3.5369	-0.795435	-2.05412	0.0001	0.00200796	yes
HS6ST1	chr2:128265479-128318597	sgNEG_sort1	sgTP63_sort1	OK	9.43131	5.21524	-0.854724	-2.05173	5e-05	0.00107673	yes
LRP1	chr12:57128400-57213377	sgNEG_sort1	sgTP63_sort1	OK	13.0665	7.80005	-0.744319	-2.05122	5e-05	0.00107673	yes
NTF4	chr19:49061065-49065076	sgNEG_sort1	sgTP63_sort1	OK	16.2123	7.05871	-1.19961	-2.04986	0.00015	0.00283727	yes
KLK11	chr19:51022230-51028034	sgNEG_sort1	sgTP63_sort1	OK	11.2361	4.68742	-1.26127	-2.04632	0.00015	0.00283727	yes
FRMD6	chr14:51489099-51730727	sgNEG_sort1	sgTP63_sort1	OK	16.0151	7.98326	-1.00438	-2.0432	5e-05	0.00107673	yes
PYCR2	chr1:225919876-225924340	sgNEG_sort1	sgTP63_sort1	OK	63.4785	38.0807	-0.737208	-2.03799	0.0002	0.00364387	yes
KANK1	chr9:470293-746106	sgNEG_sort1	sgTP63_sort1	OK	4.23053	2.17265	-0.96138	-2.02839	5e-05	0.00107673	yes
PLBD1	chr12:14503662-14567857	sgNEG_sort1	sgTP63_sort1	OK	21.485	12.0751	-0.831294	-2.02721	0.0001	0.00200796	yes
SORBS3	chr8:22544989-22575495	sgNEG_sort1	sgTP63_sort1	OK	14.9414	8.03059	-0.895739	-2.02602	0.0001	0.00200796	yes
RAB40C	chr16:589356-629273	sgNEG_sort1	sgTP63_sort1	OK	19.6459	11.2803	-0.800426	-2.0258	5e-05	0.00107673	yes
GSTA4	chr6:52977947-52995380	sgNEG_sort1	sgTP63_sort1	OK	5.63184	2.06412	-1.44808	-2.02375	0.00025	0.00439323	yes
KREMEN1	chr22:29058671-29168333	sgNEG_sort1	sgTP63_sort1	OK	6.96764	3.89291	-0.83982	-2.01986	5e-05	0.00107673	yes
MATN2	chr8:97869020-98036720	sgNEG_sort1	sgTP63_sort1	OK	36.2056	21.7222	-0.737045	-2.0077	5e-05	0.00107673	yes
VILL	chr3:37987973-38007188	sgNEG_sort1	sgTP63_sort1	OK	16.6554	9.36257	-0.831014	-2.00479	5e-05	0.00107673	yes
SMARCA1	chrX:129446500-129523564	sgNEG_sort1	sgTP63_sort1	OK	25.2753	15.2094	-0.732765	-1.99709	5e-05	0.00107673	yes
KSR1	chr17:27456440-27626438	sgNEG_sort1	sgTP63_sort1	OK	9.22762	5.26999	-0.80816	-1.98433	5e-05	0.00107673	yes
CPNE8	chr12:38652199-38908593	sgNEG_sort1	sgTP63_sort1	OK	3.91858	1.86088	-1.07434	-1.98286	0.00045	0.00704666	yes
RAB7B	chr1:205976739-206003466	sgNEG_sort1	sgTP63_sort1	OK	2.63908	0.905162	-1.54379	-1.97488	0.00055	0.00829216	yes
GPCPD1	chr20:5544433-5611026	sgNEG_sort1	sgTP63_sort1	OK	22.2693	13.4303	-0.729567	-1.97338	5e-05	0.00107673	yes
BEX3	chrX:103376322-103378164	sgNEG_sort1	sgTP63_sort1	OK	192.264	114.866	-0.743135	-1.97084	5e-05	0.00107673	yes
ERO1B	chr1:236215121-236282039	sgNEG_sort1	sgTP63_sort1	OK	4.13308	2.07257	-0.995795	-1.96723	0.0001	0.00200796	yes
TET2	chr4:105145874-105279803	sgNEG_sort1	sgTP63_sort1	OK	6.02294	3.53622	-0.768262	-1.95962	5e-05	0.00107673	yes
DEF6	chr6:35297817-35321771	sgNEG_sort1	sgTP63_sort1	OK	8.88034	4.62229	-0.942005	-1.95392	0.00045	0.00704666	yes
LURAP1L	chr9:12774989-12823060	sgNEG_sort1	sgTP63_sort1	OK	25.7307	14.4025	-0.837168	-1.95204	0.0003	0.00507835	yes
ATP8B1	chr18:57630301-57803828	sgNEG_sort1	sgTP63_sort1	OK	11.1383	6.67065	-0.739628	-1.94508	0.00015	0.00283727	yes
BLCAP	chr20:37517416-37527931	sgNEG_sort1	sgTP63_sort1	OK	108.118	66.3511	-0.704413	-1.94358	0.0002	0.00364387	yes
EYA2	chr20:46894623-47188844	sgNEG_sort1	sgTP63_sort1	OK	30.6707	18.3741	-0.739187	-1.94265	5e-05	0.00107673	yes
SYK	chr9:90801679-90898560	sgNEG_sort1	sgTP63_sort1	OK	10.5171	6.06168	-0.794948	-1.94264	0.00035	0.0057856	yes
SIPA1L2	chr1:232397964-232630491	sgNEG_sort1	sgTP63_sort1	OK	3.45606	1.881	-0.877631	-1.93708	5e-05	0.00107673	yes
FKBP11	chr12:48921958-48925547	sgNEG_sort1	sgTP63_sort1	OK	38.3651	19.2335	-0.996176	-1.93457	0.0006	0.00892525	yes
ZNF395	chr8:28345584-28386460	sgNEG_sort1	sgTP63_sort1	OK	10.4722	6.19411	-0.757603	-1.9341	0.0002	0.00364387	yes
QSOX1	chr1:180154832-180198034	sgNEG_sort1	sgTP63_sort1	OK	75.9964	46.4763	-0.709437	-1.9297	0.0002	0.00364387	yes
MLLT3	chr9:20341664-20622543	sgNEG_sort1	sgTP63_sort1	OK	2.8855	1.49947	-0.944372	-1.92387	0.00025	0.00439323	yes
SALL2	chr14:21521079-21537216	sgNEG_sort1	sgTP63_sort1	OK	2.7385	1.26477	-1.11451	-1.92223	0.0006	0.00892525	yes
ALDH7A1	chr5:126541840-126595390	sgNEG_sort1	sgTP63_sort1	OK	28.0435	17.0565	-0.717342	-1.91566	0.00015	0.00283727	yes
ALDH2	chr12:111766886-111809985	sgNEG_sort1	sgTP63_sort1	OK	10.7848	5.70461	-0.918801	-1.91546	0.00025	0.00439323	yes
HOXD9	chr2:176122684-176124917	sgNEG_sort1	sgTP63_sort1	OK	2.43313	0.800772	-1.60335	-1.91062	0.00085	0.0120541	yes
PHACTR2	chr6:143608179-143831185	sgNEG_sort1	sgTP63_sort1	OK	2.02804	1.07477	-0.916055	-1.91019	0.00025	0.00439323	yes
SYNGR1	chr22:39349948-39385588	sgNEG_sort1	sgTP63_sort1	OK	14.2352	6.42077	-1.14864	-1.90393	0.00015	0.00283727	yes
NEK6	chr9:124257605-124352442	sgNEG_sort1	sgTP63_sort1	OK	23.0701	14.0069	-0.719886	-1.89474	0.0002	0.00364387	yes
MAMDC4	chr9:136852366-136860799	sgNEG_sort1	sgTP63_sort1	OK	5.87214	3.18092	-0.884442	-1.89468	0.0001	0.00200796	yes
FGF1	chr5:142592177-142698070	sgNEG_sort1	sgTP63_sort1	OK	3.74768	1.82681	-1.03667	-1.89257	0.00025	0.00439323	yes
MORC4	chrX:106940299-107000244	sgNEG_sort1	sgTP63_sort1	OK	8.28977	4.74912	-0.803672	-1.8922	0.00015	0.00283727	yes
KRT17	chr17:41619439-41624630	sgNEG_sort1	sgTP63_sort1	OK	612.016	346.992	-0.818667	-1.8917	0.00015	0.00283727	yes
JAG1	chr20:10637683-10674046	sgNEG_sort1	sgTP63_sort1	OK	51.0178	31.5163	-0.694905	-1.88945	0.0003	0.00507835	yes
ZNF618	chr9:113876281-114056595	sgNEG_sort1	sgTP63_sort1	OK	3.23499	1.73754	-0.896714	-1.88671	0.0001	0.00200796	yes
SCGB2A1	chr11:62208667-62213939	sgNEG_sort1	sgTP63_sort1	OK	7.77453	2.24958	-1.7891	-1.8867	0.0038	0.0405566	yes
CCDC80	chr3:112604385-112641143	sgNEG_sort1	sgTP63_sort1	OK	20.6145	12.7583	-0.69222	-1.88514	0.00025	0.00439323	yes
C9orf152	chr9:110199560-110208133	sgNEG_sort1	sgTP63_sort1	OK	7.72097	4.06179	-0.926668	-1.88384	0.00025	0.00439323	yes
AKR1C1	chr10:4963261-4979967	sgNEG_sort1	sgTP63_sort1	OK	5.24096	2.07672	-1.33553	-1.87908	0.00065	0.00956265	yes
NOTCH3	chr19:15159632-15200981	sgNEG_sort1	sgTP63_sort1	OK	20.826	12.9671	-0.683527	-1.87425	0.00035	0.0057856	yes
TMEM98	chr17:32927909-32941649	sgNEG_sort1	sgTP63_sort1	OK	17.0843	9.76361	-0.807182	-1.86401	0.00025	0.00439323	yes
CEACAM5	chr19:41708584-41730433	sgNEG_sort1	sgTP63_sort1	OK	280.868	156.565	-0.843129	-1.86228	0.0003	0.00507835	yes
CEACAM7	chr19_KI270867v1_alt:4497-8694	sgNEG_sort1	sgTP63_sort1	OK	2.03971	0.690308	-1.56305	-1.86182	0.0014	0.0181241	yes
TBC1D8B	chrX:106802688-106876150	sgNEG_sort1	sgTP63_sort1	OK	4.00201	1.99248	-1.00616	-1.85934	0.00025	0.00439323	yes
DGKH	chr13:42040035-42242897	sgNEG_sort1	sgTP63_sort1	OK	2.61068	1.56394	-0.739238	-1.85894	0.0002	0.00364387	yes
SH3BGRL	chrX:81113700-81298547	sgNEG_sort1	sgTP63_sort1	OK	16.3987	9.21798	-0.831055	-1.85786	0.0005	0.00765922	yes
IGFBP7	chr4:56978639-57110385	sgNEG_sort1	sgTP63_sort1	OK	151.72	73.3161	-1.04921	-1.85447	0.0003	0.00507835	yes
C1orf115	chr1:220690285-220699157	sgNEG_sort1	sgTP63_sort1	OK	9.18955	5.2116	-0.818266	-1.85048	0.0003	0.00507835	yes
ARHGAP25	chr2:68710504-68826833	sgNEG_sort1	sgTP63_sort1	OK	3.05709	1.14517	-1.41659	-1.8462	0.0003	0.00507835	yes
SIX2	chr2:45005184-45009645	sgNEG_sort1	sgTP63_sort1	OK	4.82782	2.27353	-1.08644	-1.84459	0.00045	0.00704666	yes
TRIP6	chr7:100867327-100873454	sgNEG_sort1	sgTP63_sort1	OK	32.2628	19.7278	-0.709644	-1.84012	5e-05	0.00107673	yes
C3orf58	chr3:143971797-143992368	sgNEG_sort1	sgTP63_sort1	OK	4.54726	2.23801	-1.02278	-1.83459	0.00065	0.00956265	yes
SCNN1B	chr16:23278230-23381299	sgNEG_sort1	sgTP63_sort1	OK	2.81907	1.19329	-1.24028	-1.83362	0.0009	0.0125896	yes
FAM84A	chr2:14632685-14650819	sgNEG_sort1	sgTP63_sort1	OK	6.98201	3.87835	-0.848198	-1.83044	0.0001	0.00200796	yes
SLC7A11	chr4:138164093-138242418	sgNEG_sort1	sgTP63_sort1	OK	3.31758	1.29403	-1.35826	-1.83002	0.00095	0.0132199	yes
FAT1	chr4:186587782-186726915	sgNEG_sort1	sgTP63_sort1	OK	18.4437	11.5538	-0.67476	-1.82472	0.0005	0.00765922	yes
PRSS16	chr6:27247700-27256620	sgNEG_sort1	sgTP63_sort1	OK	8.09226	4.25949	-0.925863	-1.82299	0.00025	0.00439323	yes
SNCAIP	chr5:122311353-122464219	sgNEG_sort1	sgTP63_sort1	OK	4.70362	2.24778	-1.06527	-1.82283	0.00015	0.00283727	yes
GOLIM4	chr3:168008671-168095925	sgNEG_sort1	sgTP63_sort1	OK	5.62594	3.11114	-0.85465	-1.81789	0.00035	0.0057856	yes
HPSE	chr4:83292460-83335153	sgNEG_sort1	sgTP63_sort1	OK	2.66066	1.31331	-1.01858	-1.81541	0.0009	0.0125896	yes
ELOVL6	chr4:110049072-110199199	sgNEG_sort1	sgTP63_sort1	OK	3.22684	1.49941	-1.10573	-1.81393	0.00065	0.00956265	yes
ACSL4	chrX:109641329-109734332	sgNEG_sort1	sgTP63_sort1	OK	11.4496	6.7626	-0.759647	-1.81284	0.0007	0.0101973	yes
SEMA4A	chr1:156149672-156177751	sgNEG_sort1	sgTP63_sort1	OK	14.555	8.79265	-0.727149	-1.8128	0.00045	0.00704666	yes
SLC6A2	chr16:55655603-55706192	sgNEG_sort1	sgTP63_sort1	OK	2.82972	1.1763	-1.2664	-1.81168	0.0005	0.00765922	yes
PCCA	chr13:100089014-100588792	sgNEG_sort1	sgTP63_sort1	OK	10.9712	5.43861	-1.01241	-1.80938	0.0011	0.0148739	yes
CCDC88C	chr14:91271322-91418498	sgNEG_sort1	sgTP63_sort1	OK	7.38955	4.36341	-0.760031	-1.80125	0.00045	0.00704666	yes
ABCA12	chr2:214931541-215138591	sgNEG_sort1	sgTP63_sort1	OK	7.00085	4.32381	-0.695225	-1.79854	0.00045	0.00704666	yes
AQP5	chr12:49961495-49965682	sgNEG_sort1	sgTP63_sort1	OK	2.9209	1.05712	-1.46627	-1.79267	0.00065	0.00956265	yes
IKBIP	chr12:98613403-98645051	sgNEG_sort1	sgTP63_sort1	OK	6.99208	3.29859	-1.08387	-1.78916	0.0026	0.0299998	yes
B3GALT5	chr21:39612939-39662889	sgNEG_sort1	sgTP63_sort1	OK	5.07969	2.37766	-1.0952	-1.78518	0.0005	0.00765922	yes
ADRB2	chr5:148826592-148828634	sgNEG_sort1	sgTP63_sort1	OK	3.36077	1.45697	-1.20582	-1.77609	0.0009	0.0125896	yes
METAP1D	chr2:171999896-172082430	sgNEG_sort1	sgTP63_sort1	OK	4.9877	2.63843	-0.918694	-1.77471	0.00075	0.0108313	yes
MYO1B	chr2:191245380-191425389	sgNEG_sort1	sgTP63_sort1	OK	25.2506	16.1104	-0.648319	-1.76951	0.0004	0.00640623	yes
SEMA4B	chr15:90184919-90229660	sgNEG_sort1	sgTP63_sort1	OK	41.628	26.815	-0.634516	-1.76227	0.0006	0.00892525	yes
CKAP4	chr12:106237880-106247935	sgNEG_sort1	sgTP63_sort1	OK	57.6318	37.1945	-0.631777	-1.76092	0.00035	0.0057856	yes
SLC1A4	chr2:64988444-65023865	sgNEG_sort1	sgTP63_sort1	OK	6.83534	4.03781	-0.759441	-1.76012	0.0005	0.00765922	yes
CCDC88B	chr11:64340203-64357534	sgNEG_sort1	sgTP63_sort1	OK	9.4836	5.47421	-0.792786	-1.75876	0.00085	0.0120541	yes
NDRG2	chr14:21016762-21104704	sgNEG_sort1	sgTP63_sort1	OK	36.3039	16.2898	-1.15616	-1.75551	0.00105	0.014299	yes
FMOD	chr1:203340620-203351429	sgNEG_sort1	sgTP63_sort1	OK	2.01682	0.867711	-1.2168	-1.75253	0.0007	0.0101973	yes
CRYM	chr16:21258517-21303136	sgNEG_sort1	sgTP63_sort1	OK	3.10865	1.17778	-1.40022	-1.75219	0.00075	0.0108313	yes
PDIA6	chr2:10721104-10837977	sgNEG_sort1	sgTP63_sort1	OK	243.899	147.156	-0.728934	-1.7511	0.0004	0.00640623	yes
ABLIM1	chr10:114431109-114821643	sgNEG_sort1	sgTP63_sort1	OK	34.1088	21.7461	-0.649385	-1.74944	0.0004	0.00640623	yes
PLA2G4B	chr15:41828084-41894077	sgNEG_sort1	sgTP63_sort1	OK	18.7477	9.89761	-0.921559	-1.74798	0.00045	0.00704666	yes
HOXD10	chr2:176116763-176119942	sgNEG_sort1	sgTP63_sort1	OK	5.2151	2.46901	-1.07876	-1.74168	0.0005	0.00765922	yes
ZNF704	chr8:80628450-80884416	sgNEG_sort1	sgTP63_sort1	OK	5.92075	3.7438	-0.661274	-1.74147	0.0005	0.00765922	yes
PLEKHH3	chr17:42667913-42677030	sgNEG_sort1	sgTP63_sort1	OK	18.7628	11.7664	-0.673202	-1.74014	0.00075	0.0108313	yes
NEURL3	chr2:96497642-96508157	sgNEG_sort1	sgTP63_sort1	OK	4.75899	2.07514	-1.19745	-1.73909	0.00115	0.0154252	yes
RGS12	chr4:3292977-3439913	sgNEG_sort1	sgTP63_sort1	OK	13.7247	8.42461	-0.704091	-1.73853	0.0003	0.00507835	yes
NIPAL4	chr5:157460018-157474722	sgNEG_sort1	sgTP63_sort1	OK	3.90577	1.98228	-0.978449	-1.73764	0.00075	0.0108313	yes
ZNF385A	chr12:54369128-54391609	sgNEG_sort1	sgTP63_sort1	OK	31.6271	19.9506	-0.664727	-1.73686	0.0006	0.00892525	yes
CREG1	chr1:167541012-167553819	sgNEG_sort1	sgTP63_sort1	OK	63.2296	40.9898	-0.625336	-1.7358	0.0006	0.00892525	yes
PLA2G4A	chr1:186828899-186989896	sgNEG_sort1	sgTP63_sort1	OK	3.47975	1.70287	-1.03101	-1.73559	0.00125	0.016518	yes
EMID1	chr22:29205911-29259597	sgNEG_sort1	sgTP63_sort1	OK	4.21827	1.95839	-1.10698	-1.72754	0.00105	0.014299	yes
ARMCX6	chrX:101615117-101618001	sgNEG_sort1	sgTP63_sort1	OK	12.5495	7.22284	-0.796996	-1.72674	0.0004	0.00640623	yes
LDLRAP1	chr1:25543579-25590400	sgNEG_sort1	sgTP63_sort1	OK	31.5794	20.0355	-0.656427	-1.72297	0.0003	0.00507835	yes
CBFA2T3	chr16:88874854-88977198	sgNEG_sort1	sgTP63_sort1	OK	3.15092	1.61952	-0.960211	-1.71973	0.00105	0.014299	yes
HES1	chr3:194136141-194138612	sgNEG_sort1	sgTP63_sort1	OK	153.743	98.5413	-0.641723	-1.71829	0.0006	0.00892525	yes
MAGT1	chrX:77826363-77895568	sgNEG_sort1	sgTP63_sort1	OK	46.1222	30.0382	-0.618664	-1.71793	0.0004	0.00640623	yes
EEF2K	chr16:22206263-22288745	sgNEG_sort1	sgTP63_sort1	OK	8.46342	5.42389	-0.641915	-1.70848	0.00045	0.00704666	yes
CYB5A	chr18:74253291-74292016	sgNEG_sort1	sgTP63_sort1	OK	39.8178	23.2848	-0.774023	-1.70455	0.00105	0.014299	yes
DTNB	chr2:25377242-25673647	sgNEG_sort1	sgTP63_sort1	OK	12.4622	7.12555	-0.80648	-1.6996	0.00075	0.0108313	yes
KCNG1	chr20:51003655-51023176	sgNEG_sort1	sgTP63_sort1	OK	6.92247	3.75389	-0.8829	-1.69885	0.00145	0.0185204	yes
SERPINB13	chr18:63587205-63599199	sgNEG_sort1	sgTP63_sort1	OK	2.11773	0.861577	-1.29747	-1.69486	0.0016	0.0200532	yes
USP28	chr11:113797874-113875580	sgNEG_sort1	sgTP63_sort1	OK	14.1621	9.03482	-0.648472	-1.68837	0.0008	0.0114421	yes
ANKRD22	chr10:88802729-88851975	sgNEG_sort1	sgTP63_sort1	OK	8.44306	5.14675	-0.714104	-1.68811	0.0009	0.0125896	yes
XKRX	chrX:100886923-100957401	sgNEG_sort1	sgTP63_sort1	OK	5.65602	2.97932	-0.924802	-1.68681	0.00145	0.0185204	yes
RNASE4	chr14:20684176-20700602	sgNEG_sort1	sgTP63_sort1	OK	19.6577	10.7524	-0.870433	-1.68632	0.00115	0.0154252	yes
DUOXA1	chr15:45114320-45129938	sgNEG_sort1	sgTP63_sort1	OK	3.9864	1.54566	-1.36686	-1.68209	0.00035	0.0057856	yes
GABRP	chr5:170783718-170814047	sgNEG_sort1	sgTP63_sort1	OK	128.252	81.7684	-0.649369	-1.68209	0.001	0.0137582	yes
HSPG2	chr1:21812208-21937297	sgNEG_sort1	sgTP63_sort1	OK	6.72352	4.38175	-0.61771	-1.68099	0.00105	0.014299	yes
LOC107983993	chr7:102537918-102572660	sgNEG_sort1	sgTP63_sort1	OK	23.6837	11.1423	-1.08785	-1.6789	0.002	0.0244256	yes
HADH	chr4:107989713-108035175	sgNEG_sort1	sgTP63_sort1	OK	24.101	15.2981	-0.655742	-1.66995	0.0012	0.0159519	yes
DSG3	chr18:31447768-31478702	sgNEG_sort1	sgTP63_sort1	OK	3.81407	2.0457	-0.898741	-1.6674	0.00105	0.014299	yes
MTSS1L	chr16:70661203-70686207	sgNEG_sort1	sgTP63_sort1	OK	41.5193	26.5087	-0.647317	-1.66458	0.00055	0.00829216	yes
SLC35D1	chr1:66999331-67054397	sgNEG_sort1	sgTP63_sort1	OK	5.11968	3.17241	-0.690475	-1.65994	0.00115	0.0154252	yes
ARHGEF25	chr12:57610179-57617245	sgNEG_sort1	sgTP63_sort1	OK	4.71898	2.42123	-0.962736	-1.65441	0.0025	0.0291732	yes
MAGI3	chr1:113390473-113685923	sgNEG_sort1	sgTP63_sort1	OK	5.74019	3.57052	-0.684964	-1.65424	0.00145	0.0185204	yes
KRT6A	chr12:52487173-52493397	sgNEG_sort1	sgTP63_sort1	OK	20.9306	12.7506	-0.715053	-1.65364	0.00105	0.014299	yes
PRDM11	chr11:45146808-45235124	sgNEG_sort1	sgTP63_sort1	OK	10.1776	5.6273	-0.854889	-1.65326	0.001	0.0137582	yes
ST6GALNAC2	chr17:76565378-76586066	sgNEG_sort1	sgTP63_sort1	OK	23.358	14.8862	-0.649939	-1.65126	0.0012	0.0159519	yes
PRCP	chr11:82822939-82934659	sgNEG_sort1	sgTP63_sort1	OK	29.5601	17.2539	-0.776723	-1.64977	0.003	0.0336005	yes
PSTPIP2	chr18:45983535-46072327	sgNEG_sort1	sgTP63_sort1	OK	4.64992	2.54797	-0.867859	-1.64946	0.0014	0.0181241	yes
TMEM47	chrX:34627063-34657288	sgNEG_sort1	sgTP63_sort1	OK	4.60414	2.59039	-0.829763	-1.64753	0.0021	0.0253003	yes
THBS2	chr6:169215779-169254114	sgNEG_sort1	sgTP63_sort1	OK	7.26936	4.59443	-0.661944	-1.64656	0.001	0.0137582	yes
FRRS1	chr1:99708698-99766630	sgNEG_sort1	sgTP63_sort1	OK	6.30339	3.40289	-0.889369	-1.64355	0.0018	0.0221856	yes
MMP1	chr11:102789909-102798235	sgNEG_sort1	sgTP63_sort1	OK	23.2368	14.4041	-0.68993	-1.63579	0.0012	0.0159519	yes
SLC2A9	chr4:9771124-10040248	sgNEG_sort1	sgTP63_sort1	OK	6.6288	2.57022	-1.36685	-1.63415	0.00155	0.019518	yes
SEC24D	chr4:118722822-118838683	sgNEG_sort1	sgTP63_sort1	OK	10.6328	6.7976	-0.645431	-1.63286	0.00145	0.0185204	yes
SYT8	chr11:1827483-1837521	sgNEG_sort1	sgTP63_sort1	OK	42.1711	27.1919	-0.633077	-1.63016	0.00145	0.0185204	yes
GADD45B	chr19:2476124-2478259	sgNEG_sort1	sgTP63_sort1	OK	41.0391	26.5047	-0.630748	-1.62994	0.00125	0.016518	yes
PLA2G6	chr22:38111494-38192099	sgNEG_sort1	sgTP63_sort1	OK	17.382	10.8094	-0.685307	-1.62691	0.00145	0.0185204	yes
FLRT2	chr14:85530066-85628696	sgNEG_sort1	sgTP63_sort1	OK	2.60557	1.4954	-0.801066	-1.62492	0.0019	0.0233107	yes
PLCG1	chr20:41137518-41175721	sgNEG_sort1	sgTP63_sort1	OK	14.0168	9.13812	-0.617191	-1.62048	0.00165	0.0206027	yes
TSPAN33	chr7:129144715-129169694	sgNEG_sort1	sgTP63_sort1	OK	4.38212	2.18039	-1.00704	-1.61866	0.0018	0.0221856	yes
JAG2	chr14:105140980-105168824	sgNEG_sort1	sgTP63_sort1	OK	8.07723	5.21342	-0.631632	-1.61825	0.00105	0.014299	yes
SLC12A2	chr5:128083790-128189688	sgNEG_sort1	sgTP63_sort1	OK	84.0382	53.1585	-0.660746	-1.61456	0.0012	0.0159519	yes
HSPA5	chr9:125234847-125241387	sgNEG_sort1	sgTP63_sort1	OK	390.884	231.602	-0.755091	-1.60989	0.00145	0.0185204	yes
GPX8	chr5:55112970-55173177	sgNEG_sort1	sgTP63_sort1	OK	4.12548	2.20337	-0.904849	-1.60816	0.00235	0.027762	yes
ALDH1A1	chr9:72900661-72953317	sgNEG_sort1	sgTP63_sort1	OK	14.9466	8.89161	-0.749303	-1.60645	0.00155	0.019518	yes
IRF6	chr1:209785622-209806175	sgNEG_sort1	sgTP63_sort1	OK	56.7115	37.7081	-0.588767	-1.60474	0.0012	0.0159519	yes
TPST2	chr22:26524081-26590125	sgNEG_sort1	sgTP63_sort1	OK	12.2251	7.366	-0.730889	-1.60224	0.0011	0.0148739	yes
HOXD11	chr2:176107355-176109588	sgNEG_sort1	sgTP63_sort1	OK	3.98876	1.79052	-1.15556	-1.60161	0.0024	0.0282032	yes
PLXNA1	chr3:126982118-127037392	sgNEG_sort1	sgTP63_sort1	OK	17.4562	11.5298	-0.598367	-1.6015	0.001	0.0137582	yes
TSPAN6	chrX:100627107-100637104	sgNEG_sort1	sgTP63_sort1	OK	100.579	65.7496	-0.613276	-1.60075	0.0013	0.0170607	yes
AKR1C2	chr10:4987774-5018033	sgNEG_sort1	sgTP63_sort1	OK	3.90979	1.47771	-1.40373	-1.60024	0.0042	0.0436754	yes
SCARA3	chr8:27633664-27808510	sgNEG_sort1	sgTP63_sort1	OK	9.45388	3.74911	-1.33436	-1.59951	0.0041	0.0428689	yes
KLF5	chr13:73054975-73077542	sgNEG_sort1	sgTP63_sort1	OK	61.5781	40.8394	-0.592454	-1.59704	0.00105	0.014299	yes
PLLP	chr16:57256096-57284672	sgNEG_sort1	sgTP63_sort1	OK	34.9352	22.5215	-0.633377	-1.59614	0.0013	0.0170607	yes
CALML5	chr10:5498694-5499570	sgNEG_sort1	sgTP63_sort1	OK	72.1189	46.594	-0.630232	-1.59558	0.0015	0.0190499	yes
LPAR3	chr1:84813402-84893213	sgNEG_sort1	sgTP63_sort1	OK	10.5359	6.11878	-0.784002	-1.59418	0.0021	0.0253003	yes
PIR	chrX:15384798-15493588	sgNEG_sort1	sgTP63_sort1	OK	30.6916	19.6469	-0.643542	-1.59384	0.0013	0.0170607	yes
COPZ2	chr17:48026166-48037806	sgNEG_sort1	sgTP63_sort1	OK	9.50258	4.64336	-1.03315	-1.59244	0.0016	0.0200532	yes
C5orf30	chr5:103258701-103278660	sgNEG_sort1	sgTP63_sort1	OK	2.0721	0.975425	-1.08699	-1.58551	0.00265	0.0304454	yes
HMGN3	chr6:79201244-79234738	sgNEG_sort1	sgTP63_sort1	OK	89.4807	57.8502	-0.629256	-1.58458	0.0015	0.0190499	yes
PCP4L1	chr1:161258726-161285450	sgNEG_sort1	sgTP63_sort1	OK	2.40062	0.849429	-1.49884	-1.58342	0.00475	0.0480134	yes
ALCAM	chr3:105366712-105576913	sgNEG_sort1	sgTP63_sort1	OK	101.996	65.7745	-0.632914	-1.58275	0.00155	0.019518	yes
ERP29	chr12:112013339-112023220	sgNEG_sort1	sgTP63_sort1	OK	207.44	138.191	-0.586033	-1.58218	0.00155	0.019518	yes
PALLD	chr4:168497038-169010317	sgNEG_sort1	sgTP63_sort1	OK	19.5084	12.2974	-0.66575	-1.58091	0.0032	0.0352791	yes
FJX1	chr11:35618186-35620873	sgNEG_sort1	sgTP63_sort1	OK	3.54316	1.81468	-0.96532	-1.57742	0.0031	0.0344608	yes
C11orf53	chr11:111245719-111286406	sgNEG_sort1	sgTP63_sort1	OK	5.10042	2.17141	-1.23198	-1.57716	0.0029	0.0327272	yes
CDC42BPA	chr1:226989864-227318492	sgNEG_sort1	sgTP63_sort1	OK	6.23866	4.06245	-0.618885	-1.57625	0.00195	0.0238585	yes
ISPD	chr7:16087526-16422562	sgNEG_sort1	sgTP63_sort1	OK	6.03725	3.08034	-0.970803	-1.57611	0.0032	0.0352791	yes
FAM46C	chr1:117605981-117628389	sgNEG_sort1	sgTP63_sort1	OK	19.8286	13.3038	-0.575741	-1.57602	0.00145	0.0185204	yes
LGR4	chr11:27365960-27472787	sgNEG_sort1	sgTP63_sort1	OK	4.66088	2.86966	-0.699724	-1.57439	0.00095	0.0132199	yes
TYSND1	chr10:70137980-70146740	sgNEG_sort1	sgTP63_sort1	OK	17.039	11.3518	-0.585923	-1.56689	0.00205	0.0249224	yes
PPFIBP2	chr11:7513764-7678568	sgNEG_sort1	sgTP63_sort1	OK	12.2269	6.67342	-0.873564	-1.56144	0.005	0.0498249	yes
MGST2	chr4:139665755-140154079	sgNEG_sort1	sgTP63_sort1	OK	119.401	73.8477	-0.693187	-1.56016	0.0024	0.0282032	yes
AKR1B10	chr7:134527591-134541414	sgNEG_sort1	sgTP63_sort1	OK	6.93925	3.67311	-0.917777	-1.552	0.0032	0.0352791	yes
PLEKHH2	chr2:43637299-43767987	sgNEG_sort1	sgTP63_sort1	OK	3.93955	2.35614	-0.741604	-1.55149	0.0029	0.0327272	yes
MAP6D1	chr3:183815875-183825605	sgNEG_sort1	sgTP63_sort1	OK	2.69791	1.24202	-1.11916	-1.55044	0.0024	0.0282032	yes
MTUS1	chr8:17643793-17801579	sgNEG_sort1	sgTP63_sort1	OK	16.3933	10.5236	-0.639474	-1.55002	0.0027	0.0308872	yes
SP4	chr7:21428070-21514761	sgNEG_sort1	sgTP63_sort1	OK	5.4811	3.07118	-0.835671	-1.54759	0.0021	0.0253003	yes
NOTCH1	chr9:136494432-136545786	sgNEG_sort1	sgTP63_sort1	OK	12.5026	8.45994	-0.563512	-1.53322	0.0022	0.0263389	yes
FAM129A	chr1:184791024-184975132	sgNEG_sort1	sgTP63_sort1	OK	5.30305	3.43985	-0.624477	-1.52543	0.00245	0.0286397	yes
TSHZ1	chr18:75210754-75289950	sgNEG_sort1	sgTP63_sort1	OK	3.48786	2.07897	-0.746474	-1.52295	0.00295	0.0331237	yes
BEX2	chrX:103309345-103311046	sgNEG_sort1	sgTP63_sort1	OK	42.2429	26.782	-0.657445	-1.51996	0.003	0.0336005	yes
RNF43	chr17:58352499-58418895	sgNEG_sort1	sgTP63_sort1	OK	2.08723	1.12334	-0.893802	-1.51401	0.0036	0.0388248	yes
EMP2	chr16:10528421-10580716	sgNEG_sort1	sgTP63_sort1	OK	46.7275	31.8584	-0.552597	-1.51177	0.00235	0.027762	yes
ERVMER34-1	chr4:52743516-52751640	sgNEG_sort1	sgTP63_sort1	OK	3.68324	2.01048	-0.873432	-1.50953	0.00255	0.029679	yes
TANC1	chr2:158968599-159232659	sgNEG_sort1	sgTP63_sort1	OK	6.1621	4.00717	-0.620839	-1.50901	0.00225	0.0268414	yes
ALDH1A3	chr15:100879691-100916626	sgNEG_sort1	sgTP63_sort1	OK	20.629	14.005	-0.558732	-1.50762	0.0032	0.0352791	yes
MT1X	chr16:56682469-56684196	sgNEG_sort1	sgTP63_sort1	OK	729.398	495.902	-0.556651	-1.5066	0.00235	0.027762	yes
TNNI2	chr11:1839002-1841680	sgNEG_sort1	sgTP63_sort1	OK	19.3568	10.4796	-0.885251	-1.50619	0.0037	0.0397112	yes
WFIKKN1	chr16:631011-634116	sgNEG_sort1	sgTP63_sort1	OK	2.88489	1.37563	-1.06843	-1.50016	0.0027	0.0308872	yes
EPAS1	chr2:46297401-46386703	sgNEG_sort1	sgTP63_sort1	OK	26.0727	17.9194	-0.541016	-1.50008	0.0026	0.0299998	yes
FGFBP1	chr4:15935568-15938740	sgNEG_sort1	sgTP63_sort1	OK	42.5148	27.1289	-0.648135	-1.4996	0.0039	0.0411964	yes
ALDH3A1	chr17:19737983-19748433	sgNEG_sort1	sgTP63_sort1	OK	6.1245	3.27788	-0.90183	-1.49956	0.00345	0.0373578	yes
ADGRF1	chr6:46997702-47042363	sgNEG_sort1	sgTP63_sort1	OK	22.3889	14.0169	-0.675615	-1.49872	0.00275	0.0313519	yes
SAMD13	chr1:84298365-84350798	sgNEG_sort1	sgTP63_sort1	OK	5.18594	2.60616	-0.99268	-1.49481	0.00445	0.0454621	yes
DUSP9	chrX:153642442-153651326	sgNEG_sort1	sgTP63_sort1	OK	2.80025	1.32439	-1.08023	-1.49079	0.00425	0.0440925	yes
SLC6A14	chrX:116436578-116461458	sgNEG_sort1	sgTP63_sort1	OK	10.7986	7.17859	-0.589073	-1.49	0.00325	0.0357714	yes
FCGRT	chr19:49512278-49526428	sgNEG_sort1	sgTP63_sort1	OK	46.7462	31.5051	-0.569263	-1.48574	0.0038	0.0405566	yes
SPDEF	chr6:34537801-34556333	sgNEG_sort1	sgTP63_sort1	OK	6.16859	3.39434	-0.861809	-1.48211	0.00375	0.0401511	yes
DHRS3	chr1:12567909-12618361	sgNEG_sort1	sgTP63_sort1	OK	106.765	72.016	-0.568054	-1.48124	0.0022	0.0263389	yes
PKIB	chr6:122471916-122726373	sgNEG_sort1	sgTP63_sort1	OK	4.72805	1.9825	-1.25393	-1.48001	0.0039	0.0411964	yes
FDFT1	chr8:11795572-11839309	sgNEG_sort1	sgTP63_sort1	OK	87.2491	60.1336	-0.536969	-1.47623	0.0044	0.0451929	yes
SSH1	chr12:108782689-108857606	sgNEG_sort1	sgTP63_sort1	OK	14.6691	9.94669	-0.560496	-1.47383	0.0029	0.0327272	yes
KCNK2	chr1:215002919-215237093	sgNEG_sort1	sgTP63_sort1	OK	15.1169	10.1641	-0.572683	-1.47209	0.0038	0.0405566	yes
FKBP14	chr7:30010582-30026801	sgNEG_sort1	sgTP63_sort1	OK	2.18697	1.24563	-0.81206	-1.47007	0.0033	0.0360841	yes
CEACAM6	chr19:41755420-41772211	sgNEG_sort1	sgTP63_sort1	OK	516.33	324.82	-0.668656	-1.46814	0.0033	0.0360841	yes
LMO4	chr1:87328467-87348923	sgNEG_sort1	sgTP63_sort1	OK	9.39409	6.35213	-0.564514	-1.46726	0.0039	0.0411964	yes
PAPLN	chr14:73235841-73274640	sgNEG_sort1	sgTP63_sort1	OK	3.31352	2.0355	-0.702983	-1.46648	0.00445	0.0454621	yes
BAZ1A	chr14:34752730-34875647	sgNEG_sort1	sgTP63_sort1	OK	14.5389	9.97424	-0.543637	-1.46338	0.0039	0.0411964	yes
MAFB	chr20:40685847-40689240	sgNEG_sort1	sgTP63_sort1	OK	4.82107	2.91092	-0.727879	-1.46324	0.00375	0.0401511	yes
PHLDB2	chr3:111674675-111976517	sgNEG_sort1	sgTP63_sort1	OK	10.4123	7.05894	-0.56077	-1.46278	0.00355	0.0383475	yes
CYFIP2	chr5:157266079-157395598	sgNEG_sort1	sgTP63_sort1	OK	3.89663	2.34729	-0.731227	-1.45959	0.0049	0.0492689	yes
SLC9A2	chr2:102619688-102711350	sgNEG_sort1	sgTP63_sort1	OK	2.62854	1.55631	-0.756131	-1.45943	0.0041	0.0428689	yes
LTBP1	chr2:32947128-33399509	sgNEG_sort1	sgTP63_sort1	OK	3.62288	2.20393	-0.717061	-1.45773	0.0033	0.0360841	yes
SLC7A8	chr14:23125294-23183660	sgNEG_sort1	sgTP63_sort1	OK	4.09046	2.32825	-0.813017	-1.45566	0.00405	0.0424789	yes
LFNG	chr7:2512528-2529177	sgNEG_sort1	sgTP63_sort1	OK	34.9865	23.8065	-0.555441	-1.45344	0.0043	0.0444389	yes
PCOLCE2	chr3:142817859-142889203	sgNEG_sort1	sgTP63_sort1	OK	2.26682	1.03568	-1.13009	-1.45324	0.0045	0.0459378	yes
ARHGAP33	chr19:35775514-35788822	sgNEG_sort1	sgTP63_sort1	OK	2.51613	1.4005	-0.845262	-1.4506	0.00445	0.0454621	yes
ELF5	chr11:34478790-34513800	sgNEG_sort1	sgTP63_sort1	OK	15.3118	10.0345	-0.609671	-1.44851	0.00415	0.0432564	yes
OSTC	chr4:108650584-108667822	sgNEG_sort1	sgTP63_sort1	OK	83.741	57.9788	-0.530408	-1.443	0.0036	0.0388248	yes
MID2	chrX:107820960-107931637	sgNEG_sort1	sgTP63_sort1	OK	3.27715	2.10331	-0.639782	-1.44221	0.0048	0.048409	yes
MANEA	chr6:95577496-95609452	sgNEG_sort1	sgTP63_sort1	OK	2.3642	1.36129	-0.796374	-1.44218	0.00455	0.0462716	yes
TSEN15	chr1:183929661-184095846	sgNEG_sort1	sgTP63_sort1	OK	18.0613	11.6655	-0.630657	-1.43992	0.00495	0.0496225	yes
MAPK10	chr4:86012295-86594117	sgNEG_sort1	sgTP63_sort1	OK	3.15061	1.67586	-0.910727	-1.43922	0.00305	0.0340181	yes
CLGN	chr4:140388452-140427661	sgNEG_sort1	sgTP63_sort1	OK	2.00669	0.963404	-1.05861	-1.43722	0.0031	0.0344608	yes
NT5DC2	chr3:52495337-52535077	sgNEG_sort1	sgTP63_sort1	OK	23.9313	15.7679	-0.601903	-1.43636	0.00455	0.0462716	yes
CRIM1	chr2_GL383521v1_alt:6692-7089	sgNEG_sort1	sgTP63_sort1	OK	11.2339	7.69968	-0.54499	-1.43585	0.0039	0.0411964	yes
DST	chr6:56457986-56954671	sgNEG_sort1	sgTP63_sort1	OK	44.0062	28.745	-0.614398	-1.43543	0.00475	0.0480134	yes
IGSF11	chr3:118900629-119146068	sgNEG_sort1	sgTP63_sort1	OK	2.01389	1.03306	-0.963058	-1.42823	0.0025	0.0291732	yes
PILRB	chr7:100358002-100367831	sgNEG_sort1	sgTP63_sort1	OK	57.8906	40.3068	-0.522306	-1.42173	0.0046	0.046709	yes
EHF	chr11:34621040-34663288	sgNEG_sort1	sgTP63_sort1	OK	50.9304	35.163	-0.534467	-1.41487	0.00465	0.0471094	yes
HYOU1	chr11:119044184-119057246	sgNEG_sort1	sgTP63_sort1	OK	101.004	68.571	-0.558748	-1.41432	0.00495	0.0496225	yes
ZNF703	chr8:37695750-37700021	sgNEG_sort1	sgTP63_sort1	OK	25.6086	17.863	-0.519652	-1.40881	0.004	0.0420535	yes
METAP1	chr4:98995636-99062809	sgNEG_sort1	sgTP63_sort1	OK	29.326	20.552	-0.512904	-1.40512	0.00475	0.0480134	yes
MYCBP2	chr13:77044656-77327066	sgNEG_sort1	sgTP63_sort1	OK	8.51928	5.9277	-0.523259	-1.39596	0.005	0.0498249	yes
FMO3	chr1:171090872-171117819	sgNEG_sort1	sgTP63_sort1	OK	4.8089	2.60208	-0.886041	-1.38379	0.005	0.0498249	yes
PIAS3	chr1:145844984-145859081	sgNEG_sort1	sgTP63_sort1	OK	25.4026	17.7473	-0.517375	-1.37442	0.005	0.0498249	yes
MAST4	chr5:66596347-67169595	sgNEG_sort1	sgTP63_sort1	OK	10.243	6.07904	-0.752727	-1.31134	0.0032	0.0352791	yes
ARHGAP22	chr10:48306638-48656265	sgNEG_sort1	sgTP63_sort1	OK	3.00399	0.465593	-2.68974	-1.27139	5e-05	0.00107673	yes

## Sheet: fibroblast sort sig DOWN
gene_id	locus	sample_1	sample_2	status	value_1	value_2	log2(fold_change)	test_stat	p_value	q_value	significant
Angptl1	chr1:156804165-156939626	sgNEG-sort2	sgTP63-sort2	OK	6.93375	0.717591	-3.2724	-2.27711	0.0073	0.0160689	yes
Saa3	chr7:46711997-46715676	sgNEG-sort2	sgTP63-sort2	OK	2004.68	591.766	-1.76027	-5.51252	5e-05	0.000143687	yes
Spink2	chr5:77205105-77211471	sgNEG-sort2	sgTP63-sort2	OK	3.25015	1.1432	-1.50743	-1.44402	0.0029	0.00678158	yes
Ccl5	chr11:83525778-83530518	sgNEG-sort2	sgTP63-sort2	OK	4.85273	1.77627	-1.44995	-1.62765	0.00275	0.00645019	yes
Nt5e	chr9:88327608-88372089	sgNEG-sort2	sgTP63-sort2	OK	8.59903	3.30304	-1.38038	-4.03041	5e-05	0.000143687	yes
Per2	chr1:91415981-91459328	sgNEG-sort2	sgTP63-sort2	OK	5.56271	2.33479	-1.25249	-3.86809	5e-05	0.000143687	yes
Glp1r	chr17:30901866-30936510	sgNEG-sort2	sgTP63-sort2	OK	11.0273	4.6585	-1.24314	-3.075	5e-05	0.000143687	yes
Enpp2	chr15:54838900-54920146	sgNEG-sort2	sgTP63-sort2	OK	36.661	15.5962	-1.23305	-4.58944	5e-05	0.000143687	yes
Prl2c2	chr13:12996123-13005330	sgNEG-sort2	sgTP63-sort2	OK	2.22232	0.96681	-1.20076	-1.31248	0.0164	0.0338821	yes
Slc6a4	chr11:76998596-77032343	sgNEG-sort2	sgTP63-sort2	OK	2.53744	1.11042	-1.19227	-2.28732	5e-05	0.000143687	yes
Calcb	chr7:114718642-114723365	sgNEG-sort2	sgTP63-sort2	OK	15.5292	6.87336	-1.1759	-2.74865	5e-05	0.000143687	yes
Tmem108	chr9:103482935-103761837	sgNEG-sort2	sgTP63-sort2	OK	2.52047	1.13611	-1.1496	-2.46153	5e-05	0.000143687	yes
Dhrs9	chr2:69380461-69403086	sgNEG-sort2	sgTP63-sort2	OK	5.24219	2.3653	-1.14815	-2.85342	5e-05	0.000143687	yes
Adamts19	chr18:58836763-59053678	sgNEG-sort2	sgTP63-sort2	OK	5.30514	2.49019	-1.09114	-3.23166	5e-05	0.000143687	yes
Aplp1	chr7:30434979-30445582	sgNEG-sort2	sgTP63-sort2	OK	14.0918	6.75678	-1.06045	-3.35503	5e-05	0.000143687	yes
Cryaa	chr17:31677930-31681730	sgNEG-sort2	sgTP63-sort2	OK	4.8399	2.32823	-1.05574	-1.82257	0.0007	0.0017835	yes
Serpinb2	chr1:107511422-107525600	sgNEG-sort2	sgTP63-sort2	OK	60.4873	29.2537	-1.04802	-3.87023	5e-05	0.000143687	yes
Ereg	chr5:91074616-91093649	sgNEG-sort2	sgTP63-sort2	OK	58.6726	28.5938	-1.03698	-3.93328	5e-05	0.000143687	yes
Lcn2	chr2:32384636-32387739	sgNEG-sort2	sgTP63-sort2	OK	71.5451	35.0191	-1.03071	-3.46236	5e-05	0.000143687	yes
Sytl1	chr4:133253089-133263087	sgNEG-sort2	sgTP63-sort2	OK	5.87959	2.88651	-1.02639	-2.36152	5e-05	0.000143687	yes
Cdh2	chr18:16588876-16809246	sgNEG-sort2	sgTP63-sort2	OK	6.02073	2.95799	-1.02532	-3.20598	5e-05	0.000143687	yes
Adamts17	chr7:66839734-67152625	sgNEG-sort2	sgTP63-sort2	OK	4.07634	2.02901	-1.0065	-2.9802	5e-05	0.000143687	yes
Cxcl2	chr5:90903898-90905938	sgNEG-sort2	sgTP63-sort2	OK	59.757	30.1864	-0.985211	-3.57904	5e-05	0.000143687	yes
Stmn2	chr3:8509526-8561604	sgNEG-sort2	sgTP63-sort2	OK	28.8626	14.6225	-0.981014	-3.4892	5e-05	0.000143687	yes
Clu	chr14:65968482-65981548	sgNEG-sort2	sgTP63-sort2	OK	287.52	148.072	-0.957366	-3.38985	5e-05	0.000143687	yes
Aass	chr6:23072172-23132986	sgNEG-sort2	sgTP63-sort2	OK	14.2651	7.36772	-0.953198	-3.39442	5e-05	0.000143687	yes
Ccl24	chr5:135569936-135573043	sgNEG-sort2	sgTP63-sort2	OK	13.2976	6.88666	-0.949286	-2.46894	5e-05	0.000143687	yes
Vit	chr17:78508062-78627409	sgNEG-sort2	sgTP63-sort2	OK	13.7808	7.16788	-0.94304	-3.07641	5e-05	0.000143687	yes
H2-DMb1	chr17:34153190-34160229	sgNEG-sort2	sgTP63-sort2	OK	2.3583	1.23785	-0.929914	-1.34368	0.00965	0.0207925	yes
Ceacam19	chr7:19875741-19887965	sgNEG-sort2	sgTP63-sort2	OK	5.52623	2.90402	-0.928247	-2.53247	5e-05	0.000143687	yes
Adgrf4	chr17:42656886-42692284	sgNEG-sort2	sgTP63-sort2	OK	5.41916	2.8597	-0.922203	-2.43735	5e-05	0.000143687	yes
Pxmp2	chr5:110274285-110286168	sgNEG-sort2	sgTP63-sort2	OK	2.32096	1.23138	-0.914444	-1.20515	0.0205	0.0415387	yes
Nppc	chr1:86666292-86670573	sgNEG-sort2	sgTP63-sort2	OK	12.6187	6.79438	-0.893143	-2.09943	5e-05	0.000143687	yes
Col24a1	chr3:145292471-145552011	sgNEG-sort2	sgTP63-sort2	OK	13.9444	7.55045	-0.885054	-3.46375	5e-05	0.000143687	yes
Gap43	chr16:42248560-42340651	sgNEG-sort2	sgTP63-sort2	OK	19.5724	10.6132	-0.882967	-2.60151	5e-05	0.000143687	yes
Tspan13	chr12:36014554-36042478	sgNEG-sort2	sgTP63-sort2	OK	6.09697	3.30778	-0.882227	-2.09362	5e-05	0.000143687	yes
Sema3e	chr5:14025275-14256689	sgNEG-sort2	sgTP63-sort2	OK	2.44296	1.34966	-0.856026	-2.3173	5e-05	0.000143687	yes
3010026O09Rik	chr11:50174850-50200115	sgNEG-sort2	sgTP63-sort2	OK	4.05575	2.26048	-0.843341	-1.40946	0.00635	0.014111	yes
Capn6	chrX:143802236-143827412	sgNEG-sort2	sgTP63-sort2	OK	10.2831	5.75545	-0.837272	-2.78314	5e-05	0.000143687	yes
Ptgfr	chr3:151798609-151837528	sgNEG-sort2	sgTP63-sort2	OK	2.59858	1.45524	-0.836464	-2.03923	5e-05	0.000143687	yes
Pik3r5	chr11:68432124-68497846	sgNEG-sort2	sgTP63-sort2	OK	5.72412	3.22166	-0.82925	-2.53093	5e-05	0.000143687	yes
Xpnpep2	chrX:48108724-48136981	sgNEG-sort2	sgTP63-sort2	OK	44.2822	24.9271	-0.829009	-3.20145	5e-05	0.000143687	yes
Akr1c18	chr13:4132626-4150631	sgNEG-sort2	sgTP63-sort2	OK	7.92163	4.47781	-0.823003	-1.75675	0.0007	0.0017835	yes
Pde1c	chr6:56069803-56369634	sgNEG-sort2	sgTP63-sort2	OK	2.37708	1.34434	-0.822293	-1.85104	0.00025	0.000672292	yes
Myrf	chr19:10208270-10240748	sgNEG-sort2	sgTP63-sort2	OK	34.5492	19.6233	-0.816082	-3.19191	5e-05	0.000143687	yes
Cd80	chr16:38458932-38486932	sgNEG-sort2	sgTP63-sort2	OK	2.0553	1.16753	-0.815885	-1.28542	0.01165	0.0247222	yes
Hdc	chr2:126593659-126618678	sgNEG-sort2	sgTP63-sort2	OK	17.6304	10.0405	-0.812239	-2.74211	5e-05	0.000143687	yes
Brinp3	chr1:146495665-146902472	sgNEG-sort2	sgTP63-sort2	OK	9.45557	5.40275	-0.807471	-2.38121	5e-05	0.000143687	yes
Rfx2	chr17:56775896-56831008	sgNEG-sort2	sgTP63-sort2	OK	7.51651	4.32049	-0.798867	-2.4385	5e-05	0.000143687	yes
Sdsl	chr5:120458201-120472763	sgNEG-sort2	sgTP63-sort2	OK	4.72411	2.72421	-0.794206	-1.47878	0.00335	0.00775772	yes
Nfatc2	chr2:168476409-168601657	sgNEG-sort2	sgTP63-sort2	OK	2.85051	1.64569	-0.792524	-2.0877	5e-05	0.000143687	yes
Ablim3	chr18:61799392-61911852	sgNEG-sort2	sgTP63-sort2	OK	3.6497	2.1241	-0.780927	-2.09211	0.0001	0.000280029	yes
Adamts3	chr5:89673840-89883334	sgNEG-sort2	sgTP63-sort2	OK	12.8689	7.49055	-0.780746	-3.07698	5e-05	0.000143687	yes
Fam110c	chr12:31073967-31079940	sgNEG-sort2	sgTP63-sort2	OK	26.1495	15.2691	-0.776167	-2.82952	5e-05	0.000143687	yes
Rasgef1b	chr5:99217419-99252927	sgNEG-sort2	sgTP63-sort2	OK	2.16019	1.27868	-0.756502	-1.52506	0.00305	0.00710681	yes
Csf3	chr11:98701312-98703629	sgNEG-sort2	sgTP63-sort2	OK	3.59292	2.12713	-0.756246	-1.34195	0.0083	0.0180981	yes
Vsig8	chr1:172555937-172563717	sgNEG-sort2	sgTP63-sort2	OK	6.26707	3.71297	-0.755218	-1.76256	0.00065	0.00166194	yes
Ndnf	chr6:65671610-65706930	sgNEG-sort2	sgTP63-sort2	OK	9.49484	5.63793	-0.751979	-2.65081	5e-05	0.000143687	yes
Hp	chr8:109575127-109579172	sgNEG-sort2	sgTP63-sort2	OK	704.582	418.909	-0.750132	-2.30599	5e-05	0.000143687	yes
Cldn10	chr14:118787870-118874525	sgNEG-sort2	sgTP63-sort2	OK	21.1439	12.5941	-0.747491	-2.03131	0.00015	0.000413012	yes
Sgk1	chr10:21882183-21999902	sgNEG-sort2	sgTP63-sort2	OK	182.46	108.803	-0.745863	-2.79515	5e-05	0.000143687	yes
Tppp	chr13:74009418-74035753	sgNEG-sort2	sgTP63-sort2	OK	8.28644	4.94496	-0.744793	-2.62137	5e-05	0.000143687	yes
Fgf23	chr6:127072901-127082296	sgNEG-sort2	sgTP63-sort2	OK	24.6304	14.7487	-0.739849	-2.67157	5e-05	0.000143687	yes
Bmp2	chr2:133552158-133562896	sgNEG-sort2	sgTP63-sort2	OK	3.1354	1.87924	-0.738494	-1.80341	0.00045	0.00117468	yes
1810041L15Rik	chr15:84379202-84447097	sgNEG-sort2	sgTP63-sort2	OK	3.32181	1.99176	-0.737924	-2.14602	5e-05	0.000143687	yes
Amhr2	chr15:102445366-102454639	sgNEG-sort2	sgTP63-sort2	OK	2.92764	1.76503	-0.730042	-1.40003	0.00605	0.0134813	yes
Fam26f	chr10:34126066-34127972	sgNEG-sort2	sgTP63-sort2	OK	3.42175	2.07069	-0.72462	-1.16089	0.02465	0.0492107	yes
Sfrp4	chr13:19623174-19632823	sgNEG-sort2	sgTP63-sort2	OK	945.594	574.072	-0.719989	-1.99443	5e-05	0.000143687	yes
Rbm38	chr2:173021901-173034731	sgNEG-sort2	sgTP63-sort2	OK	2.56702	1.56413	-0.714737	-1.25634	0.01485	0.0309039	yes
Noct	chr3:51224446-51251654	sgNEG-sort2	sgTP63-sort2	OK	19.5887	11.961	-0.711678	-2.66152	5e-05	0.000143687	yes
Epb41l4a	chr18:33796326-34007206	sgNEG-sort2	sgTP63-sort2	OK	4.001	2.45871	-0.702458	-1.90947	0.00015	0.000413012	yes
Wnt2	chr6:17988939-18030445	sgNEG-sort2	sgTP63-sort2	OK	53.7626	33.0687	-0.701138	-2.72024	5e-05	0.000143687	yes
Adgrg2	chrX:160390689-160498076	sgNEG-sort2	sgTP63-sort2	OK	4.82041	2.97447	-0.696526	-2.10368	0.0001	0.000280029	yes
Cxcl13	chr5:95956938-95961068	sgNEG-sort2	sgTP63-sort2	OK	85.4591	52.7945	-0.694847	-2.44785	5e-05	0.000143687	yes
Fam46b	chr4:133480132-133487940	sgNEG-sort2	sgTP63-sort2	OK	8.16653	5.05546	-0.691882	-1.9602	0.0002	0.000543624	yes
Star	chr8:25808512-25815982	sgNEG-sort2	sgTP63-sort2	OK	17.0554	10.5916	-0.687307	-2.55757	5e-05	0.000143687	yes
Celf4	chr18:25477619-25753983	sgNEG-sort2	sgTP63-sort2	OK	2.45513	1.53084	-0.681474	-1.58688	0.0017	0.00410919	yes
Apln	chrX:48025145-48034852	sgNEG-sort2	sgTP63-sort2	OK	17.2294	10.7613	-0.679021	-2.45615	5e-05	0.000143687	yes
Stac2	chr11:98036623-98053462	sgNEG-sort2	sgTP63-sort2	OK	50.8128	31.7532	-0.67829	-2.72136	5e-05	0.000143687	yes
Rtn1	chr12:72211748-72409054	sgNEG-sort2	sgTP63-sort2	OK	2.25632	1.41499	-0.673181	-1.14321	0.02	0.0406007	yes
Mapkapk3	chr9:107254926-107289877	sgNEG-sort2	sgTP63-sort2	OK	8.88309	5.58667	-0.669075	-2.02717	0.0001	0.000280029	yes
Adgrb2	chr4:129984869-130022633	sgNEG-sort2	sgTP63-sort2	OK	3.18623	2.00464	-0.668508	-1.85912	0.0005	0.00129842	yes
Barx2	chr9:31846043-31913285	sgNEG-sort2	sgTP63-sort2	OK	8.31582	5.23199	-0.668498	-1.76369	0.0008	0.00202265	yes
Tmem35	chrX:134295224-134305969	sgNEG-sort2	sgTP63-sort2	OK	8.69543	5.47224	-0.668127	-1.82564	0.00045	0.00117468	yes
Nr4a3	chr4:48045304-48086446	sgNEG-sort2	sgTP63-sort2	OK	102.428	64.5039	-0.667146	-2.28681	5e-05	0.000143687	yes
Npy2r	chr3:82538382-82548085	sgNEG-sort2	sgTP63-sort2	OK	2.35102	1.48328	-0.664497	-1.43209	0.0043	0.00980458	yes
Il1rl1	chr1:40429569-40465414	sgNEG-sort2	sgTP63-sort2	OK	2.49642	1.57684	-0.662827	-1.4107	0.0064	0.0142109	yes
Ezr	chr17:6738130-6782780	sgNEG-sort2	sgTP63-sort2	OK	43.4837	27.6407	-0.65368	-2.5835	5e-05	0.000143687	yes
Gjb4	chr4:127351085-127354081	sgNEG-sort2	sgTP63-sort2	OK	6.91191	4.39727	-0.652477	-1.49582	0.0038	0.00873416	yes
Cxcl5	chr5:90759297-90761625	sgNEG-sort2	sgTP63-sort2	OK	26.5022	16.8859	-0.650293	-2.23734	5e-05	0.000143687	yes
Chil1	chr1:134182403-134190031	sgNEG-sort2	sgTP63-sort2	OK	105.007	66.9844	-0.648588	-2.50227	5e-05	0.000143687	yes
Arl4a	chr12:40033290-40037987	sgNEG-sort2	sgTP63-sort2	OK	19.5938	12.5068	-0.647678	-2.48042	5e-05	0.000143687	yes
Gjb3	chr4:127325234-127330836	sgNEG-sort2	sgTP63-sort2	OK	9.33135	5.96924	-0.644538	-1.65769	0.00115	0.00284441	yes
Pamr1	chr2:102550020-102643040	sgNEG-sort2	sgTP63-sort2	OK	14.9985	9.60032	-0.643667	-2.27347	5e-05	0.000143687	yes
Morc4	chrX:139821634-139871654	sgNEG-sort2	sgTP63-sort2	OK	6.43372	4.12966	-0.639629	-2.05627	5e-05	0.000143687	yes
Mpp2	chr11:102057016-102088515	sgNEG-sort2	sgTP63-sort2	OK	2.09904	1.34761	-0.639326	-1.44246	0.00445	0.0101234	yes
Rel	chr11:23741728-23770970	sgNEG-sort2	sgTP63-sort2	OK	3.14086	2.01785	-0.638338	-1.40954	0.00515	0.0116008	yes
Trib1	chr15:59648653-59657099	sgNEG-sort2	sgTP63-sort2	OK	79.569	51.6055	-0.624682	-2.3515	5e-05	0.000143687	yes
Gng4	chr13:13784058-13827895	sgNEG-sort2	sgTP63-sort2	OK	3.3797	2.19471	-0.622862	-1.47987	0.00395	0.00905714	yes
Calca	chr7:114631477-114636357	sgNEG-sort2	sgTP63-sort2	OK	20.2717	13.1741	-0.621759	-1.71944	0.00045	0.00117468	yes
Ifitm1	chr7:140967428-140969827	sgNEG-sort2	sgTP63-sort2	OK	21.1003	13.7343	-0.619484	-1.46533	0.0051	0.0114954	yes
Smad7	chr18:75367364-75395934	sgNEG-sort2	sgTP63-sort2	OK	27.5278	17.9879	-0.613864	-2.45515	5e-05	0.000143687	yes
Cd109	chr9:78615545-78716260	sgNEG-sort2	sgTP63-sort2	OK	6.37843	4.17926	-0.609954	-2.123	5e-05	0.000143687	yes
Galnt11	chr5:25222892-25265918	sgNEG-sort2	sgTP63-sort2	OK	35.3279	23.1684	-0.608648	-2.39554	5e-05	0.000143687	yes
Tlr5	chr1:182954787-182976044	sgNEG-sort2	sgTP63-sort2	OK	4.41119	2.89374	-0.608235	-1.60897	0.0015	0.00365194	yes
Nxnl2	chr13:51171024-51175187	sgNEG-sort2	sgTP63-sort2	OK	7.70411	5.05579	-0.607693	-1.33618	0.00855	0.018604	yes
Cav1	chr6:17306334-17341328	sgNEG-sort2	sgTP63-sort2	OK	137.636	90.3885	-0.606648	-2.29928	5e-05	0.000143687	yes
Hmgn5	chrX:109004536-109013380	sgNEG-sort2	sgTP63-sort2	OK	20.2544	13.3128	-0.605424	-2.08418	5e-05	0.000143687	yes
Mtrf1	chr14:79397771-79423650	sgNEG-sort2	sgTP63-sort2	OK	2.62478	1.72662	-0.604246	-1.12044	0.02265	0.0455068	yes
Stxbp6	chr12:44852485-45074483	sgNEG-sort2	sgTP63-sort2	OK	4.14153	2.7298	-0.601371	-1.73596	0.00105	0.00261247	yes
Ccrl2	chr9:111054833-111057518	sgNEG-sort2	sgTP63-sort2	OK	16.4226	10.8345	-0.600054	-1.93686	0.0002	0.000543624	yes
Edn1	chr13:42301269-42307989	sgNEG-sort2	sgTP63-sort2	OK	2.35037	1.55176	-0.598983	-1.15552	0.0186	0.0379957	yes
Hopx	chr5:77086985-77115123	sgNEG-sort2	sgTP63-sort2	OK	7.59081	5.03315	-0.592793	-1.27417	0.01145	0.0243375	yes
Tnfaip3	chr10:19000909-19015410	sgNEG-sort2	sgTP63-sort2	OK	203.363	135.066	-0.590393	-1.8814	0.00025	0.000672292	yes
Sfrp2	chr3:83766320-83774314	sgNEG-sort2	sgTP63-sort2	OK	678.056	451.401	-0.586995	-1.69307	0.0008	0.00202265	yes
Adamts9	chr6:92772698-92901441	sgNEG-sort2	sgTP63-sort2	OK	14.2461	9.486	-0.586691	-2.32083	5e-05	0.000143687	yes
Ak5	chr3:152396002-152668140	sgNEG-sort2	sgTP63-sort2	OK	15.1572	10.1263	-0.581894	-1.24061	0.0156	0.0323559	yes
Iglon5	chr7:43472906-43490023	sgNEG-sort2	sgTP63-sort2	OK	6.50527	4.34951	-0.580756	-1.62568	0.0012	0.00296109	yes
Chst1	chr2:92599706-92615252	sgNEG-sort2	sgTP63-sort2	OK	2.78076	1.85972	-0.580393	-1.25959	0.0111	0.0236502	yes
Hebp2	chr10:18540122-18546076	sgNEG-sort2	sgTP63-sort2	OK	4.24752	2.84828	-0.57653	-1.25558	0.01245	0.0262781	yes
Nr4a2	chr2:57107225-57124003	sgNEG-sort2	sgTP63-sort2	OK	63.2347	42.4675	-0.574357	-2.30122	5e-05	0.000143687	yes
Parvb	chr15:84232042-84315609	sgNEG-sort2	sgTP63-sort2	OK	3.12865	2.10337	-0.572834	-1.4428	0.00565	0.0126463	yes
Klf9	chr19:23141225-23166911	sgNEG-sort2	sgTP63-sort2	OK	45.7854	30.8697	-0.5687	-2.24973	5e-05	0.000143687	yes
Ppl	chr16:5086290-5132481	sgNEG-sort2	sgTP63-sort2	OK	6.01976	4.0618	-0.567586	-1.97489	5e-05	0.000143687	yes
Emb	chr13:117220572-117274415	sgNEG-sort2	sgTP63-sort2	OK	259.462	175.321	-0.565521	-1.86505	0.0001	0.000280029	yes
Col4a5	chrX:141475418-141689235	sgNEG-sort2	sgTP63-sort2	OK	30.4588	20.5891	-0.564976	-2.2602	5e-05	0.000143687	yes
Ccl9	chr11:83572916-83578636	sgNEG-sort2	sgTP63-sort2	OK	23.6171	15.9649	-0.56493	-2.15052	5e-05	0.000143687	yes
Cxcl12	chr6:117168534-117181368	sgNEG-sort2	sgTP63-sort2	OK	469.927	317.878	-0.563962	-1.65548	0.0008	0.00202265	yes
Cobll1	chr2:65088338-65238626	sgNEG-sort2	sgTP63-sort2	OK	2.54253	1.72017	-0.563713	-1.43871	0.0048	0.0108613	yes
1700017B05Rik	chr9:57252321-57262599	sgNEG-sort2	sgTP63-sort2	OK	22.7595	15.4002	-0.563518	-2.25895	5e-05	0.000143687	yes
Cxcl1	chr5:90891244-90893115	sgNEG-sort2	sgTP63-sort2	OK	1646.36	1114.5	-0.562884	-1.61561	0.00125	0.00307813	yes
Steap4	chr5:7960471-7982213	sgNEG-sort2	sgTP63-sort2	OK	150.827	102.365	-0.559171	-1.98543	5e-05	0.000143687	yes
Kif21a	chr15:90933274-91049951	sgNEG-sort2	sgTP63-sort2	OK	2.59355	1.76059	-0.558868	-1.58147	0.00165	0.00399511	yes
Nfatc1	chr18:80606204-80713071	sgNEG-sort2	sgTP63-sort2	OK	17.3103	11.7713	-0.556359	-2.14409	5e-05	0.000143687	yes
Slco5a1	chr1:12866549-12991135	sgNEG-sort2	sgTP63-sort2	OK	2.18163	1.48379	-0.55612	-1.64149	0.00095	0.00237754	yes
Gjb5	chr4:127354808-127358164	sgNEG-sort2	sgTP63-sort2	OK	46.6476	31.7373	-0.555621	-2.16094	5e-05	0.000143687	yes
Cxadr	chr16:78301670-78359785	sgNEG-sort2	sgTP63-sort2	OK	7.02491	4.78944	-0.552621	-1.27056	0.00855	0.018604	yes
Pde3b	chr7:114415253-114537937	sgNEG-sort2	sgTP63-sort2	OK	4.40915	3.00931	-0.55107	-1.72429	0.00055	0.00141977	yes
Tuba4a	chr1:75210828-75219294	sgNEG-sort2	sgTP63-sort2	OK	12.9986	8.90311	-0.545977	-1.16418	0.0244	0.0487503	yes
Tnfsf11	chr14:78277445-78308043	sgNEG-sort2	sgTP63-sort2	OK	25.3854	17.397	-0.545161	-1.9747	5e-05	0.000143687	yes
Irak3	chr10:120141653-120201537	sgNEG-sort2	sgTP63-sort2	OK	25.3285	17.4783	-0.535202	-2.0505	5e-05	0.000143687	yes
Dusp14	chr11:84048044-84068357	sgNEG-sort2	sgTP63-sort2	OK	9.22775	6.37123	-0.534406	-1.3638	0.00705	0.0155476	yes
Cry1	chr10:85131699-85185054	sgNEG-sort2	sgTP63-sort2	OK	4.06168	2.81207	-0.530445	-1.34855	0.0073	0.0160689	yes
Ptpn5	chr7:47077799-47133684	sgNEG-sort2	sgTP63-sort2	OK	3.77644	2.61703	-0.529095	-1.20889	0.0148	0.0308135	yes
Pde7b	chr10:20398003-20725068	sgNEG-sort2	sgTP63-sort2	OK	6.08045	4.21482	-0.528708	-1.65804	0.0011	0.00272905	yes
Sdc4	chr2:164424246-164443188	sgNEG-sort2	sgTP63-sort2	OK	186.497	129.566	-0.525465	-1.91003	0.0001	0.000280029	yes
Arap2	chr5:62602445-62766177	sgNEG-sort2	sgTP63-sort2	OK	2.10281	1.46124	-0.525124	-1.46636	0.00335	0.00775772	yes
Enpp3	chr10:24773813-24836195	sgNEG-sort2	sgTP63-sort2	OK	55.6627	38.7164	-0.523768	-2.09086	0.00015	0.000413012	yes
Gabrb1	chr5:71700015-72137244	sgNEG-sort2	sgTP63-sort2	OK	4.58845	3.20506	-0.517657	-1.15825	0.0235	0.0470742	yes
Sh3bp4	chr1:89070461-89153793	sgNEG-sort2	sgTP63-sort2	OK	10.6338	7.43034	-0.51715	-1.82783	0.0003	0.000799291	yes
Iqgap2	chr13:95627176-95891922	sgNEG-sort2	sgTP63-sort2	OK	6.80078	4.76087	-0.514474	-1.77447	0.00055	0.00141977	yes
Arid5b	chr10:68095592-68278726	sgNEG-sort2	sgTP63-sort2	OK	24.0447	16.8471	-0.513219	-2.05142	0.0001	0.000280029	yes
Atf3	chr1:191170296-191183333	sgNEG-sort2	sgTP63-sort2	OK	353.731	248.288	-0.510641	-1.73421	0.00025	0.000672292	yes
Dnajb9	chr12:44205896-44210068	sgNEG-sort2	sgTP63-sort2	OK	46.5581	32.68	-0.510623	-2.00528	5e-05	0.000143687	yes
Akap2	chr4:57568247-57896984	sgNEG-sort2	sgTP63-sort2	OK	39.129	27.5056	-0.508515	-1.91896	0.0001	0.000280029	yes
Siah2	chr3:58674948-58692388	sgNEG-sort2	sgTP63-sort2	OK	6.37775	4.4839	-0.508294	-1.41575	0.0055	0.0123281	yes
Tnfaip6	chr2:52038112-52056681	sgNEG-sort2	sgTP63-sort2	OK	465.14	327.718	-0.505208	-1.69254	0.00075	0.00190255	yes
Usp53	chr3:122933600-122984447	sgNEG-sort2	sgTP63-sort2	OK	15.358	10.8219	-0.50503	-1.92399	0.0002	0.000543624	yes
Lrrc8c	chr5:105519470-105608954	sgNEG-sort2	sgTP63-sort2	OK	11.0777	7.80613	-0.504984	-1.6871	0.00075	0.00190255	yes
Fam46c	chr3:100471535-100489192	sgNEG-sort2	sgTP63-sort2	OK	5.64989	3.98565	-0.50341	-1.25997	0.0118	0.0250173	yes
Dusp10	chr1:184034460-184075636	sgNEG-sort2	sgTP63-sort2	OK	9.07149	6.41731	-0.499372	-1.5717	0.0022	0.00523546	yes
Dmkn	chr7:30763755-30781066	sgNEG-sort2	sgTP63-sort2	OK	22.2923	15.7852	-0.497976	-1.23871	0.013	0.0273472	yes
Ugt1a7c	chr1:88055410-88220002	sgNEG-sort2	sgTP63-sort2	OK	94.9141	67.2472	-0.497149	-1.276	0.0107	0.022865	yes
Paqr7	chr4:134496760-134510237	sgNEG-sort2	sgTP63-sort2	OK	7.25845	5.15109	-0.494783	-1.61162	0.0018	0.00433591	yes
Ptger3	chr3:157566891-157644758	sgNEG-sort2	sgTP63-sort2	OK	136.978	97.2158	-0.494681	-1.93192	0.00015	0.000413012	yes
Ccnd2	chr6:127125708-127151048	sgNEG-sort2	sgTP63-sort2	OK	20.3087	14.4265	-0.49337	-1.96791	0.0001	0.000280029	yes
Ptger2	chr14:44988110-45003820	sgNEG-sort2	sgTP63-sort2	OK	2.2885	1.62672	-0.492437	-1.12544	0.02355	0.0471681	yes
Spsb1	chr4:149896283-149955006	sgNEG-sort2	sgTP63-sort2	OK	94.4023	67.112	-0.492251	-1.92298	5e-05	0.000143687	yes
Apbb1ip	chr2:22774326-22875653	sgNEG-sort2	sgTP63-sort2	OK	37.4846	26.658	-0.491727	-1.9422	0.0001	0.000280029	yes
Kcnk5	chr14:20140057-20181782	sgNEG-sort2	sgTP63-sort2	OK	3.52864	2.51163	-0.490487	-1.25989	0.01125	0.023942	yes
Car5b	chrX:163976821-164028010	sgNEG-sort2	sgTP63-sort2	OK	2.85856	2.035	-0.490259	-1.18583	0.01875	0.0382742	yes
Tob1	chr11:94211453-94215492	sgNEG-sort2	sgTP63-sort2	OK	32.1402	22.9041	-0.488773	-1.89806	0.0002	0.000543624	yes
Fst	chr13:114452261-114458951	sgNEG-sort2	sgTP63-sort2	OK	37.7934	26.9546	-0.487602	-1.91703	5e-05	0.000143687	yes
Por	chr5:135689144-135735326	sgNEG-sort2	sgTP63-sort2	OK	87.6006	62.487	-0.487385	-1.92912	0.0001	0.000280029	yes
Spon2	chr5:33213517-33218238	sgNEG-sort2	sgTP63-sort2	OK	374.588	267.363	-0.486505	-1.57008	0.00155	0.0037676	yes
Fndc1	chr17:7738567-7804974	sgNEG-sort2	sgTP63-sort2	OK	202.933	144.911	-0.485832	-1.37117	0.0058	0.0129602	yes
Cp	chr3:19957053-20035310	sgNEG-sort2	sgTP63-sort2	OK	92.3565	65.9685	-0.485437	-1.69934	0.0005	0.00129842	yes
Atp2b4	chr1:133702673-133753747	sgNEG-sort2	sgTP63-sort2	OK	24.7224	17.6645	-0.484968	-1.94726	0.00015	0.000413012	yes
Ptx3	chr3:66053557-66296837	sgNEG-sort2	sgTP63-sort2	OK	686.64	490.887	-0.484161	-1.27505	0.0093	0.0200986	yes
Jam2	chr16:84774122-84826375	sgNEG-sort2	sgTP63-sort2	OK	19.8783	14.2283	-0.482435	-1.9129	5e-05	0.000143687	yes
Grem2	chr1:174833784-174921819	sgNEG-sort2	sgTP63-sort2	OK	29.7462	21.3003	-0.481835	-1.88431	0.0002	0.000543624	yes
Fbxo33	chr12:59200654-59219483	sgNEG-sort2	sgTP63-sort2	OK	12.5865	9.02931	-0.479194	-1.73859	0.00075	0.00190255	yes
Eml1	chr12:108371152-108539564	sgNEG-sort2	sgTP63-sort2	OK	45.0483	32.337	-0.478288	-1.91816	0.00015	0.000413012	yes
Stk35	chr2:129800516-129832285	sgNEG-sort2	sgTP63-sort2	OK	8.6906	6.24506	-0.476739	-1.79718	0.0004	0.00105048	yes
Aff2	chrX:69360330-69868037	sgNEG-sort2	sgTP63-sort2	OK	2.1179	1.52312	-0.475602	-1.14395	0.02255	0.0453227	yes
Enc1	chr13:97241104-97253040	sgNEG-sort2	sgTP63-sort2	OK	122.814	88.3589	-0.475031	-1.62137	0.00145	0.00353797	yes
Zbtb7c	chr18:75820177-76148564	sgNEG-sort2	sgTP63-sort2	OK	6.14178	4.42266	-0.473742	-1.55953	0.0016	0.00388126	yes
Syne1	chr10:5336948-5550692	sgNEG-sort2	sgTP63-sort2	OK	23.2646	16.755	-0.473545	-1.73999	0.00055	0.00141977	yes
Lrg1	chr17:56119677-56121946	sgNEG-sort2	sgTP63-sort2	OK	57.7358	41.5999	-0.472889	-1.75322	0.00055	0.00141977	yes
Tsc22d3	chrX:140539528-140600522	sgNEG-sort2	sgTP63-sort2	OK	28.8925	20.8274	-0.472213	-1.74465	0.0004	0.00105048	yes
Wee1	chr7:110122058-110143299	sgNEG-sort2	sgTP63-sort2	OK	6.00482	4.32913	-0.472046	-1.42899	0.0032	0.00743179	yes
Tgfb2	chr1:186623185-186705992	sgNEG-sort2	sgTP63-sort2	OK	22.4992	16.2269	-0.471487	-1.8515	0.00025	0.000672292	yes
Gnptab	chr10:88379411-88447329	sgNEG-sort2	sgTP63-sort2	OK	39.7539	28.7103	-0.46953	-1.86956	0.0002	0.000543624	yes
Lacc1	chr14:77024200-77036617	sgNEG-sort2	sgTP63-sort2	OK	16.1383	11.6567	-0.469326	-1.64884	0.00105	0.00261247	yes
Fth1	chr19:9980599-9985111	sgNEG-sort2	sgTP63-sort2	OK	2970.1	2146	-0.468862	-1.10709	0.02505	0.0499445	yes
Rasal2	chr1:157135182-157412595	sgNEG-sort2	sgTP63-sort2	OK	5.94227	4.30404	-0.465324	-1.77722	0.00045	0.00117468	yes
Prss35	chr9:86743632-86757506	sgNEG-sort2	sgTP63-sort2	OK	4.11694	2.9846	-0.464036	-1.13692	0.0213	0.0430108	yes
Gprc5b	chr7:118842217-118995211	sgNEG-sort2	sgTP63-sort2	OK	45.6822	33.1493	-0.462653	-1.64149	0.0006	0.00154109	yes
Srgap1	chr10:121780990-122047315	sgNEG-sort2	sgTP63-sort2	OK	8.01526	5.8163	-0.462648	-1.75632	0.0003	0.000799291	yes
Il6ra	chr3:89869323-89913196	sgNEG-sort2	sgTP63-sort2	OK	5.15848	3.74673	-0.461313	-1.33673	0.00765	0.0167811	yes
Sema5a	chr15:32244812-32696341	sgNEG-sort2	sgTP63-sort2	OK	18.9319	13.7671	-0.459594	-1.79754	0.00015	0.000413012	yes
Acp5	chr9:22126726-22135746	sgNEG-sort2	sgTP63-sort2	OK	67.8367	49.5138	-0.454236	-1.77673	0.0003	0.000799291	yes
Mme	chr3:63295434-63383713	sgNEG-sort2	sgTP63-sort2	OK	8.04811	5.87573	-0.453883	-1.62186	0.001	0.00249506	yes
Plcb4	chr2:135741829-136013068	sgNEG-sort2	sgTP63-sort2	OK	5.11451	3.73914	-0.451891	-1.34408	0.00635	0.014111	yes
Epha2	chr4:141301220-141329384	sgNEG-sort2	sgTP63-sort2	OK	4.70657	3.4413	-0.451721	-1.30532	0.00945	0.0203988	yes
Auts2	chr5:131437681-132542343	sgNEG-sort2	sgTP63-sort2	OK	2.88284	2.11233	-0.448661	-1.31215	0.00905	0.0195999	yes
Rasl12	chr9:65398487-65422773	sgNEG-sort2	sgTP63-sort2	OK	8.17366	5.99656	-0.446847	-1.33634	0.00765	0.0167811	yes
Ackr3	chr1:90203979-90215722	sgNEG-sort2	sgTP63-sort2	OK	270.189	198.236	-0.446748	-1.58809	0.0015	0.00365194	yes
Elovl6	chr3:129532385-129638493	sgNEG-sort2	sgTP63-sort2	OK	3.08326	2.26573	-0.444482	-1.31268	0.0089	0.0192982	yes
Itgb8	chr12:119162802-119238276	sgNEG-sort2	sgTP63-sort2	OK	4.01483	2.95056	-0.444351	-1.15582	0.0205	0.0415387	yes
Chka	chr19:3851772-3894369	sgNEG-sort2	sgTP63-sort2	OK	11.4189	8.39324	-0.444121	-1.46247	0.0035	0.00808598	yes
Naaa	chr5:92257659-92278181	sgNEG-sort2	sgTP63-sort2	OK	39.1185	28.7563	-0.443973	-1.7595	0.00035	0.000925354	yes
Greb1l	chr18:10325178-10562941	sgNEG-sort2	sgTP63-sort2	OK	2.56746	1.88747	-0.44389	-1.38508	0.00625	0.0139023	yes
Bcl2l11	chr2:128126037-128162547	sgNEG-sort2	sgTP63-sort2	OK	5.67603	4.17762	-0.442202	-1.33866	0.00655	0.0145209	yes
Prkd1	chr12:50341231-50649223	sgNEG-sort2	sgTP63-sort2	OK	8.59565	6.3273	-0.442018	-1.50033	0.0032	0.00743179	yes
Kdr	chr5:75933269-75978428	sgNEG-sort2	sgTP63-sort2	OK	5.62945	4.14586	-0.441323	-1.4454	0.00425	0.00969673	yes
St7	chr6:17693993-17943023	sgNEG-sort2	sgTP63-sort2	OK	23.8352	17.5631	-0.440543	-1.58982	0.00105	0.00261247	yes
Abhd5	chr9:122351615-122381523	sgNEG-sort2	sgTP63-sort2	OK	26.5523	19.5748	-0.439841	-1.7106	0.0008	0.00202265	yes
Ackr1	chr1:173331885-173333503	sgNEG-sort2	sgTP63-sort2	OK	25.8748	19.0999	-0.437983	-1.41957	0.0039	0.00894956	yes
Nabp1	chr1:51469487-51478399	sgNEG-sort2	sgTP63-sort2	OK	8.53301	6.31375	-0.434558	-1.34043	0.00825	0.0179969	yes
Shb	chr4:45423275-45530828	sgNEG-sort2	sgTP63-sort2	OK	16.173	11.9855	-0.432298	-1.57294	0.0016	0.00388126	yes
Serpinb9b	chr13:33027413-33040558	sgNEG-sort2	sgTP63-sort2	OK	8.33394	6.18115	-0.431123	-1.19548	0.017	0.035001	yes
Cth	chr3:157894247-157925063	sgNEG-sort2	sgTP63-sort2	OK	11.8317	8.7761	-0.431007	-1.30871	0.0074	0.0162734	yes
Zbtb2	chr10:4367073-4388108	sgNEG-sort2	sgTP63-sort2	OK	5.90514	4.38241	-0.430246	-1.28457	0.01115	0.0237507	yes
Stk26	chrX:50841370-50942710	sgNEG-sort2	sgTP63-sort2	OK	7.21326	5.35474	-0.429835	-1.28927	0.01115	0.0237507	yes
Sod2	chr17:13007838-13018119	sgNEG-sort2	sgTP63-sort2	OK	26.994	20.0446	-0.429425	-1.70313	0.0005	0.00129842	yes
Gda	chr19:21391306-21472661	sgNEG-sort2	sgTP63-sort2	OK	104.675	77.8549	-0.427058	-1.49143	0.00275	0.00645019	yes
Slc12a2	chr18:57878677-57946821	sgNEG-sort2	sgTP63-sort2	OK	3.80419	2.83404	-0.424731	-1.37205	0.0057	0.0127518	yes
Col6a5	chr9:105856069-105960643	sgNEG-sort2	sgTP63-sort2	OK	32.5876	24.2915	-0.423872	-1.55725	0.0023	0.00545487	yes
Gata6	chr18:11052509-11085635	sgNEG-sort2	sgTP63-sort2	OK	30.2904	22.5903	-0.423156	-1.67965	0.0004	0.00105048	yes
Mxd1	chr6:86647044-86669159	sgNEG-sort2	sgTP63-sort2	OK	4.9813	3.71887	-0.421659	-1.32614	0.0075	0.0164813	yes
Auh	chr13:52835109-52929677	sgNEG-sort2	sgTP63-sort2	OK	22.0055	16.44	-0.420651	-1.37339	0.0056	0.0125389	yes
Exoc6b	chr6:84618485-85069513	sgNEG-sort2	sgTP63-sort2	OK	15.8869	11.8708	-0.420418	-1.66044	0.001	0.00249506	yes
Pde5a	chr3:122729157-122859374	sgNEG-sort2	sgTP63-sort2	OK	3.95604	2.95752	-0.419667	-1.3829	0.0054	0.0121238	yes
Gfpt2	chr11:49794154-49838620	sgNEG-sort2	sgTP63-sort2	OK	251.852	188.566	-0.417504	-1.36464	0.0062	0.0137972	yes
Nfkbia	chr12:55489408-55492647	sgNEG-sort2	sgTP63-sort2	OK	446.382	334.218	-0.417489	-1.44114	0.0036	0.00830455	yes
Rcan1	chr16:92391950-92466169	sgNEG-sort2	sgTP63-sort2	OK	172.561	129.278	-0.416632	-1.59408	0.0016	0.00388126	yes
Dusp8	chr7:142079486-142095284	sgNEG-sort2	sgTP63-sort2	OK	6.17252	4.62508	-0.416383	-1.4067	0.00375	0.00862633	yes
Uap1	chr1:170141222-170174964	sgNEG-sort2	sgTP63-sort2	OK	136.236	102.143	-0.415517	-1.5009	0.00295	0.00688975	yes
Ssh3	chr19:4261668-4269172	sgNEG-sort2	sgTP63-sort2	OK	14.5853	10.9369	-0.415311	-1.48091	0.0031	0.0072153	yes
1500015O10Rik	chr1:43730601-43742564	sgNEG-sort2	sgTP63-sort2	OK	71.406	53.5596	-0.414898	-1.48633	0.00295	0.00688975	yes
Slc7a8	chr14:54722214-54781886	sgNEG-sort2	sgTP63-sort2	OK	51.3636	38.5323	-0.414678	-1.6255	0.00095	0.00237754	yes
Tmem120a	chr5:135735489-135744172	sgNEG-sort2	sgTP63-sort2	OK	37.7125	28.3804	-0.410147	-1.48782	0.003	0.00700046	yes
Adamts1	chr16:85793827-85803113	sgNEG-sort2	sgTP63-sort2	OK	208.705	157.086	-0.409913	-1.24885	0.01215	0.025693	yes
Casp1	chr9:5298516-5307281	sgNEG-sort2	sgTP63-sort2	OK	12.4766	9.39525	-0.409219	-1.18624	0.0167	0.0344472	yes
Ociad2	chr5:73322197-73338947	sgNEG-sort2	sgTP63-sort2	OK	8.27197	6.24891	-0.404628	-1.23148	0.01255	0.0264758	yes
Cpz	chr5:35502217-35525626	sgNEG-sort2	sgTP63-sort2	OK	49.7287	37.5941	-0.403571	-1.57318	0.0019	0.00456238	yes
Rassf2	chr2:131992849-132029988	sgNEG-sort2	sgTP63-sort2	OK	43.1069	32.5915	-0.403424	-1.58888	0.00195	0.00467605	yes
Usp54	chr14:20548911-20618354	sgNEG-sort2	sgTP63-sort2	OK	4.18913	3.16939	-0.402443	-1.33679	0.0081	0.0177019	yes
Sgms2	chr3:131318985-131344923	sgNEG-sort2	sgTP63-sort2	OK	4.23933	3.20893	-0.401743	-1.2933	0.00905	0.0195999	yes
Hspb1	chr5:135887918-135889563	sgNEG-sort2	sgTP63-sort2	OK	125.876	95.4277	-0.399525	-1.5697	0.002	0.00478849	yes
Gnai1	chr5:18265134-18360413	sgNEG-sort2	sgTP63-sort2	OK	7.2816	5.52077	-0.399385	-1.25611	0.01165	0.0247222	yes
Ncald	chr15:37366174-37792428	sgNEG-sort2	sgTP63-sort2	OK	9.31297	7.06322	-0.398916	-1.34591	0.00675	0.0149287	yes
Isyna1	chr8:70594480-70597290	sgNEG-sort2	sgTP63-sort2	OK	54.9482	41.6857	-0.39852	-1.55779	0.00165	0.00399511	yes
Srgn	chr10:62494427-62507755	sgNEG-sort2	sgTP63-sort2	OK	71.7241	54.4235	-0.39823	-1.48079	0.00265	0.00622977	yes
C1rl	chr6:124493112-124510643	sgNEG-sort2	sgTP63-sort2	OK	5.42781	4.11891	-0.398107	-1.14056	0.02125	0.0429247	yes
Lgi2	chr5:52533516-52566306	sgNEG-sort2	sgTP63-sort2	OK	110.562	84.1131	-0.394455	-1.32968	0.00755	0.0165829	yes
Dnajb5	chr4:42953093-42958732	sgNEG-sort2	sgTP63-sort2	OK	7.40197	5.63328	-0.393934	-1.13539	0.02275	0.0456858	yes
Arhgap28	chr17:67842707-68004108	sgNEG-sort2	sgTP63-sort2	OK	8.15313	6.20957	-0.392862	-1.4408	0.00465	0.0105475	yes
Mt2	chr8:94172617-94173567	sgNEG-sort2	sgTP63-sort2	OK	1547.1	1178.4	-0.392743	-1.34958	0.00675	0.0149287	yes
Atp10a	chr7:58658201-58829426	sgNEG-sort2	sgTP63-sort2	OK	15.3962	11.7411	-0.390999	-1.55259	0.0017	0.00410919	yes
Pom121	chr5:135369952-135394546	sgNEG-sort2	sgTP63-sort2	OK	17.6672	13.4817	-0.390071	-1.48477	0.00265	0.00622977	yes
Sorbs3	chr14:70180467-70207671	sgNEG-sort2	sgTP63-sort2	OK	53.8092	41.0662	-0.389902	-1.48492	0.0026	0.00612099	yes
Lgi3	chr14:70530820-70538324	sgNEG-sort2	sgTP63-sort2	OK	9.69651	7.40218	-0.389514	-1.32158	0.00665	0.0147248	yes
Appbp2	chr11:85191309-85235120	sgNEG-sort2	sgTP63-sort2	OK	26.5981	20.3226	-0.388239	-1.49111	0.00245	0.00578898	yes
Ubc	chr5:125385964-125390017	sgNEG-sort2	sgTP63-sort2	OK	63.9279	48.8654	-0.387632	-1.55734	0.00185	0.00445025	yes
Hs3st1	chr5:39613934-39644631	sgNEG-sort2	sgTP63-sort2	OK	13.841	10.5819	-0.387342	-1.19768	0.0143	0.0298581	yes
Zfpm1	chr8:122282140-122337247	sgNEG-sort2	sgTP63-sort2	OK	14.5034	11.0898	-0.387155	-1.42726	0.0044	0.0100166	yes
Tmem100	chr11:90030347-90036505	sgNEG-sort2	sgTP63-sort2	OK	82.9239	63.4159	-0.386944	-1.52209	0.0023	0.00545487	yes
Slc9a3r1	chr11:115163340-115181178	sgNEG-sort2	sgTP63-sort2	OK	19.6037	15.0027	-0.385905	-1.33959	0.00765	0.0167811	yes
Creb3l1	chr2:91982327-92024170	sgNEG-sort2	sgTP63-sort2	OK	154.497	118.282	-0.38535	-1.45753	0.004	0.00916316	yes
Ccl2	chr11:82035576-82037452	sgNEG-sort2	sgTP63-sort2	OK	708.199	542.331	-0.384982	-1.41276	0.0053	0.0119156	yes
Dpysl2	chr14:66802863-66868600	sgNEG-sort2	sgTP63-sort2	OK	7.58584	5.81726	-0.382968	-1.33354	0.0079	0.0172928	yes
Adarb1	chr10:77290726-77418273	sgNEG-sort2	sgTP63-sort2	OK	7.15869	5.49016	-0.382846	-1.41168	0.0046	0.0104404	yes
Abat	chr16:8513428-8621567	sgNEG-sort2	sgTP63-sort2	OK	24.3551	18.6837	-0.382442	-1.5404	0.00255	0.00600965	yes
Ctbp2	chr7:132987010-133123483	sgNEG-sort2	sgTP63-sort2	OK	16.5601	12.7206	-0.380539	-1.4208	0.00455	0.0103353	yes
Pkhd1l1	chr15:44457552-44597135	sgNEG-sort2	sgTP63-sort2	OK	8.09418	6.21912	-0.380175	-1.34037	0.00675	0.0149287	yes
Lgals3	chr14:47373859-47386167	sgNEG-sort2	sgTP63-sort2	OK	48.4312	37.2136	-0.380108	-1.44098	0.00365	0.00841116	yes
Cited2	chr10:17723227-17725674	sgNEG-sort2	sgTP63-sort2	OK	20.8062	15.9884	-0.37999	-1.34759	0.0079	0.0172928	yes
Nfkbib	chr7:28756173-28766644	sgNEG-sort2	sgTP63-sort2	OK	17.1232	13.1706	-0.378634	-1.17867	0.0187	0.0381783	yes
Gem	chr4:11704446-11714993	sgNEG-sort2	sgTP63-sort2	OK	163.33	125.672	-0.378131	-1.40733	0.0048	0.0108613	yes
Ifi205	chr1:174011997-174031755	sgNEG-sort2	sgTP63-sort2	OK	124.587	95.9	-0.377556	-1.40746	0.00495	0.011181	yes
Adgrd1	chr5:129096749-129204599	sgNEG-sort2	sgTP63-sort2	OK	173.089	133.248	-0.377403	-1.20368	0.01465	0.0305281	yes
Ccdc149	chr5:52374650-52471543	sgNEG-sort2	sgTP63-sort2	OK	6.18221	4.76173	-0.376635	-1.15561	0.01775	0.0364002	yes
C1s2	chr6:124624624-124636085	sgNEG-sort2	sgTP63-sort2	OK	124.932	96.2514	-0.376263	-1.40378	0.0044	0.0100166	yes
Cryab	chr9:50751071-50756635	sgNEG-sort2	sgTP63-sort2	OK	64.1811	49.4883	-0.375059	-1.3503	0.00705	0.0155476	yes
Zfpm2	chr15:40655041-41104592	sgNEG-sort2	sgTP63-sort2	OK	16.6142	12.8222	-0.373773	-1.48268	0.0033	0.00764944	yes
Trak1	chr9:121366957-121474918	sgNEG-sort2	sgTP63-sort2	OK	19.7417	15.2656	-0.370956	-1.48583	0.0032	0.00743179	yes
Nnmt	chr9:48591876-48605123	sgNEG-sort2	sgTP63-sort2	OK	79.5058	61.4964	-0.370558	-1.43276	0.00385	0.00884208	yes
Camkk1	chr11:73019007-73042065	sgNEG-sort2	sgTP63-sort2	OK	7.66974	5.94127	-0.368406	-1.2066	0.01485	0.0309039	yes
Tmem38b	chr4:53826044-53862018	sgNEG-sort2	sgTP63-sort2	OK	7.2172	5.59254	-0.367936	-1.12801	0.02175	0.0438456	yes
Kdm6b	chr11:69398517-69413675	sgNEG-sort2	sgTP63-sort2	OK	34.5972	26.8237	-0.367147	-1.44444	0.00325	0.00753932	yes
S100a10	chr3:93555116-93564645	sgNEG-sort2	sgTP63-sort2	OK	704.362	546.335	-0.366532	-1.4046	0.00505	0.0113908	yes
Tyro3	chr2:119797739-119818103	sgNEG-sort2	sgTP63-sort2	OK	11.1061	8.62734	-0.364363	-1.3351	0.0068	0.015031	yes
Gdpd2	chrX:100729846-100738901	sgNEG-sort2	sgTP63-sort2	OK	28.8818	22.4415	-0.363994	-1.38156	0.00595	0.013271	yes
Tmem119	chr5:113793728-113800352	sgNEG-sort2	sgTP63-sort2	OK	100.266	78.0894	-0.360634	-1.44832	0.00385	0.00884208	yes
Uhrf1bp1l	chr10:89744990-89819869	sgNEG-sort2	sgTP63-sort2	OK	10.9511	8.53291	-0.359961	-1.41008	0.0049	0.0110757	yes
Hspb8	chr5:116408490-116422864	sgNEG-sort2	sgTP63-sort2	OK	181.859	141.87	-0.358256	-1.37502	0.0056	0.0125389	yes
Mras	chr9:99385419-99436712	sgNEG-sort2	sgTP63-sort2	OK	8.73307	6.81943	-0.356838	-1.25175	0.01295	0.0272481	yes
Kank4	chr4:98754891-98817537	sgNEG-sort2	sgTP63-sort2	OK	4.82494	3.77259	-0.354955	-1.12551	0.0233	0.0467095	yes
Ier3	chr17:35821712-35822911	sgNEG-sort2	sgTP63-sort2	OK	575.854	450.693	-0.353558	-1.25344	0.0106	0.0226667	yes
Tspan5	chr3:138742207-138904433	sgNEG-sort2	sgTP63-sort2	OK	9.03412	7.07528	-0.352596	-1.17373	0.0188	0.038369	yes
Fam213a	chr14:40993734-41013833	sgNEG-sort2	sgTP63-sort2	OK	23.1589	18.1384	-0.352522	-1.20708	0.0151	0.0313905	yes
Gm2a	chr11:55097984-55113028	sgNEG-sort2	sgTP63-sort2	OK	49.9186	39.1001	-0.352407	-1.39654	0.0054	0.0121238	yes
Fam107b	chr2:3713457-3782134	sgNEG-sort2	sgTP63-sort2	OK	10.6341	8.33565	-0.351331	-1.21563	0.0163	0.0336948	yes
Gla	chrX:134588168-134601005	sgNEG-sort2	sgTP63-sort2	OK	10.9889	8.61842	-0.350553	-1.21521	0.01445	0.0301463	yes
Adamtsl4	chr3:95676200-95687917	sgNEG-sort2	sgTP63-sort2	OK	15.8845	12.4833	-0.34762	-1.32311	0.00775	0.0169832	yes
Add3	chr19:53140442-53247326	sgNEG-sort2	sgTP63-sort2	OK	77.0561	60.573	-0.347235	-1.32085	0.0081	0.0177019	yes
Epb41l3	chr17:69156809-69289987	sgNEG-sort2	sgTP63-sort2	OK	15.5498	12.2251	-0.347051	-1.33697	0.00845	0.0184012	yes
Slc9a9	chr9:94669891-95230452	sgNEG-sort2	sgTP63-sort2	OK	7.13501	5.61315	-0.346106	-1.12209	0.02245	0.0451362	yes
Foxo3	chr10:42185785-42276742	sgNEG-sort2	sgTP63-sort2	OK	11.0602	8.71664	-0.343535	-1.17769	0.01985	0.0403244	yes
Ddr1	chr17:35681566-35704139	sgNEG-sort2	sgTP63-sort2	OK	28.2042	22.2698	-0.340821	-1.36038	0.0062	0.0137972	yes
Col18a1	chr10:77052178-77166530	sgNEG-sort2	sgTP63-sort2	OK	71.4426	56.4278	-0.340378	-1.25891	0.0102	0.0218771	yes
Pnrc1	chr4:33245422-33248787	sgNEG-sort2	sgTP63-sort2	OK	114.093	90.1503	-0.339805	-1.34535	0.0063	0.0140065	yes
Ap4e1	chr2:127008710-127069814	sgNEG-sort2	sgTP63-sort2	OK	6.3711	5.03615	-0.339221	-1.23746	0.01285	0.0270543	yes
Dram1	chr10:88322803-88357075	sgNEG-sort2	sgTP63-sort2	OK	118.028	93.3401	-0.338559	-1.28075	0.00985	0.021189	yes
Tmeff2	chr1:50927522-51187270	sgNEG-sort2	sgTP63-sort2	OK	20.4687	16.1884	-0.338457	-1.30586	0.0089	0.0192982	yes
Tgif1	chr17:70844204-70853532	sgNEG-sort2	sgTP63-sort2	OK	31.791	25.1472	-0.338222	-1.24715	0.0127	0.0267668	yes
Wt1	chr2:105126528-105173614	sgNEG-sort2	sgTP63-sort2	OK	81.1848	64.2197	-0.338195	-1.33135	0.00805	0.0176002	yes
Aldh1a1	chr19:20601981-20643462	sgNEG-sort2	sgTP63-sort2	OK	18.5394	14.6708	-0.337649	-1.18913	0.0167	0.0344472	yes
Pappa	chr4:65124173-65357509	sgNEG-sort2	sgTP63-sort2	OK	16.6877	13.2065	-0.337534	-1.32201	0.00815	0.0177967	yes
Mt1	chr8:94179088-94180327	sgNEG-sort2	sgTP63-sort2	OK	964.363	763.779	-0.336421	-1.25156	0.01185	0.0251149	yes
Traf3ip2	chr10:39612933-39655307	sgNEG-sort2	sgTP63-sort2	OK	11.6304	9.21606	-0.335684	-1.16087	0.0195	0.03967	yes
Ptprj	chr2:90429755-90580647	sgNEG-sort2	sgTP63-sort2	OK	12.8423	10.1777	-0.335494	-1.22122	0.0142	0.0296682	yes
Fhl1	chrX:56731760-56793346	sgNEG-sort2	sgTP63-sort2	OK	47.2718	37.4826	-0.334758	-1.32875	0.0072	0.0158613	yes
Rab32	chr10:10545038-10558207	sgNEG-sort2	sgTP63-sort2	OK	37.8467	30.0347	-0.333536	-1.3114	0.00835	0.0181992	yes
Mast4	chr13:102732488-103334492	sgNEG-sort2	sgTP63-sort2	OK	12.5624	9.96989	-0.333462	-1.34623	0.00655	0.0145209	yes
Tnip1	chr11:54910786-54962940	sgNEG-sort2	sgTP63-sort2	OK	27.0207	21.4447	-0.33344	-1.30083	0.00955	0.0205994	yes
Stat5a	chr11:100859350-100885169	sgNEG-sort2	sgTP63-sort2	OK	8.28529	6.57586	-0.333372	-1.1349	0.02345	0.0469828	yes
Agpat4	chr17:12119283-12219640	sgNEG-sort2	sgTP63-sort2	OK	18.506	14.696	-0.332571	-1.16024	0.0211	0.0426468	yes
Plagl1	chr10:13090787-13131695	sgNEG-sort2	sgTP63-sort2	OK	13.0727	10.3837	-0.332235	-1.27108	0.0112	0.0238457	yes
Clip3	chr7:30291752-30308367	sgNEG-sort2	sgTP63-sort2	OK	29.4122	23.3664	-0.331981	-1.3255	0.0073	0.0160689	yes
Cyp7b1	chr3:18071949-18243338	sgNEG-sort2	sgTP63-sort2	OK	60.8646	48.3543	-0.331959	-1.32322	0.0081	0.0177019	yes
Pam	chr1:97821093-98095632	sgNEG-sort2	sgTP63-sort2	OK	102.398	81.3662	-0.331692	-1.22397	0.0148	0.0308135	yes
Pde10a	chr17:8526800-8986648	sgNEG-sort2	sgTP63-sort2	OK	4.96288	3.94395	-0.331539	-1.19496	0.0185	0.0378047	yes
Serpinb6b	chr13:32965512-32979037	sgNEG-sort2	sgTP63-sort2	OK	35.7826	28.4405	-0.331309	-1.27565	0.0093	0.0200986	yes
Afap1l2	chr19:56912353-57008575	sgNEG-sort2	sgTP63-sort2	OK	9.17975	7.29766	-0.33102	-1.17123	0.0179	0.0366859	yes
Flnc	chr6:29433152-29461888	sgNEG-sort2	sgTP63-sort2	OK	38.6245	30.7626	-0.32834	-1.22841	0.0141	0.0294723	yes
Irs2	chr8:10986963-11008430	sgNEG-sort2	sgTP63-sort2	OK	52.1246	41.5304	-0.327795	-1.30028	0.0077	0.0168834	yes
Sft2d2	chr1:165174340-165194433	sgNEG-sort2	sgTP63-sort2	OK	6.46089	5.14813	-0.327683	-1.15903	0.0195	0.03967	yes
C1rb	chr6:124570429-124581044	sgNEG-sort2	sgTP63-sort2	OK	34.305	27.3639	-0.326146	-1.24474	0.01275	0.0268625	yes
Ism1	chr2:139678177-139758581	sgNEG-sort2	sgTP63-sort2	OK	21.3154	17.0138	-0.325194	-1.23196	0.01365	0.0285958	yes
Flcn	chr11:59791407-59810039	sgNEG-sort2	sgTP63-sort2	OK	11.3292	9.04561	-0.324759	-1.13397	0.02415	0.0482891	yes
Sat1	chrX:155213125-155216449	sgNEG-sort2	sgTP63-sort2	OK	114.736	91.6401	-0.324271	-1.28873	0.0084	0.0182992	yes
Sel1l3	chr5:53107082-53213452	sgNEG-sort2	sgTP63-sort2	OK	9.14985	7.31134	-0.323612	-1.12691	0.025	0.0498541	yes
Tgfbr3	chr5:107106569-107289595	sgNEG-sort2	sgTP63-sort2	OK	86.85	69.4161	-0.323256	-1.13539	0.0217	0.0437506	yes
Adcy5	chr16:35155635-35304549	sgNEG-sort2	sgTP63-sort2	OK	25.6694	20.5336	-0.322064	-1.29239	0.0087	0.0189069	yes
Heatr1	chr13:12395374-12438893	sgNEG-sort2	sgTP63-sort2	OK	4.89716	3.91977	-0.321177	-1.11723	0.0235	0.0470742	yes
Fam234a	chr17:26212691-26244242	sgNEG-sort2	sgTP63-sort2	OK	37.9882	30.4164	-0.320702	-1.27983	0.00975	0.0209912	yes
Nab1	chr1:52455848-52500448	sgNEG-sort2	sgTP63-sort2	OK	23.0999	18.5029	-0.320135	-1.29431	0.00975	0.0209912	yes
Birc3	chr9:7848700-7873170	sgNEG-sort2	sgTP63-sort2	OK	37.2726	29.8664	-0.319592	-1.26062	0.0117	0.0248172	yes
Trps1	chr15:50654758-50890041	sgNEG-sort2	sgTP63-sort2	OK	4.2224	3.38423	-0.319237	-1.16064	0.0195	0.03967	yes
Igfbp6	chr15:102144185-102149512	sgNEG-sort2	sgTP63-sort2	OK	423.018	339.078	-0.319099	-1.14427	0.02285	0.045872	yes
Tm4sf1	chr3:57287063-57301919	sgNEG-sort2	sgTP63-sort2	OK	54.1374	43.4194	-0.318288	-1.26869	0.01125	0.023942	yes
Adamts14	chr10:61197111-61273438	sgNEG-sort2	sgTP63-sort2	OK	11.6024	9.30675	-0.318069	-1.21706	0.01485	0.0309039	yes
Ptgs1	chr2:36230425-36252271	sgNEG-sort2	sgTP63-sort2	OK	47.5811	38.1845	-0.317402	-1.27954	0.011	0.0234563	yes
Slc25a25	chr2:32414486-32455476	sgNEG-sort2	sgTP63-sort2	OK	33.0383	26.5427	-0.315827	-1.24889	0.01355	0.0284013	yes
C4a	chr17:34809091-34823454	sgNEG-sort2	sgTP63-sort2	OK	49.4372	39.7627	-0.31418	-1.17283	0.0196	0.0398616	yes
Ccdc50	chr16:27388955-27452218	sgNEG-sort2	sgTP63-sort2	OK	22.6336	18.2213	-0.312835	-1.26181	0.01215	0.025693	yes
Mapk6	chr9:75386781-75410016	sgNEG-sort2	sgTP63-sort2	OK	28.4755	22.9309	-0.312428	-1.25493	0.01115	0.0237507	yes
Hk2	chr6:82725026-82774454	sgNEG-sort2	sgTP63-sort2	OK	26.6112	21.4378	-0.311879	-1.25206	0.0114	0.0242435	yes
Glul	chr1:153899928-153909723	sgNEG-sort2	sgTP63-sort2	OK	68.0892	54.8531	-0.311854	-1.2284	0.01155	0.0245335	yes
St3gal1	chr15:67102874-67176882	sgNEG-sort2	sgTP63-sort2	OK	43.4302	34.9939	-0.311596	-1.20256	0.0148	0.0308135	yes
Ephx1	chr1:180989555-181017569	sgNEG-sort2	sgTP63-sort2	OK	36.8345	29.6818	-0.311478	-1.19525	0.015	0.0311998	yes
Ctps	chr4:120539867-120570276	sgNEG-sort2	sgTP63-sort2	OK	45.249	36.4934	-0.31025	-1.24846	0.01235	0.0260779	yes
Abi1	chr2:22895521-23040241	sgNEG-sort2	sgTP63-sort2	OK	36.9116	29.77	-0.310214	-1.23319	0.01355	0.0284013	yes
Agap1	chr1:89454810-89895282	sgNEG-sort2	sgTP63-sort2	OK	8.0452	6.49144	-0.30959	-1.19255	0.0164	0.0338821	yes
Tnfrsf1b	chr4:145212367-145246870	sgNEG-sort2	sgTP63-sort2	OK	21.8736	17.6607	-0.308643	-1.21882	0.01585	0.0328311	yes
Cdkn1a	chr17:29090978-29100722	sgNEG-sort2	sgTP63-sort2	OK	44.9682	36.3103	-0.308528	-1.21842	0.01355	0.0284013	yes
Ces2g	chr8:104961717-104969537	sgNEG-sort2	sgTP63-sort2	OK	33.6086	27.1503	-0.307866	-1.22392	0.01425	0.0297636	yes
Kank1	chr19:25237201-25434496	sgNEG-sort2	sgTP63-sort2	OK	18.4291	14.8899	-0.307652	-1.23156	0.0132	0.0277347	yes
Manba	chr3:135485610-135571403	sgNEG-sort2	sgTP63-sort2	OK	17.2663	13.9516	-0.307533	-1.19247	0.016	0.0331173	yes
Il1rl2	chr1:40324626-40365471	sgNEG-sort2	sgTP63-sort2	OK	41.5871	33.6577	-0.305199	-1.20427	0.01665	0.0343563	yes
Sema3b	chr9:107597673-107609241	sgNEG-sort2	sgTP63-sort2	OK	22.4979	18.2103	-0.305035	-1.20292	0.01425	0.0297636	yes
Pdlim1	chr19:40222238-40271616	sgNEG-sort2	sgTP63-sort2	OK	36.2789	29.3736	-0.304611	-1.14293	0.02225	0.0447686	yes
Inhbb	chr1:119415464-119422248	sgNEG-sort2	sgTP63-sort2	OK	10.758	8.71298	-0.304167	-1.11963	0.0246	0.0491213	yes
Fam102b	chr3:108970996-109027607	sgNEG-sort2	sgTP63-sort2	OK	39.7631	32.2052	-0.304134	-1.1972	0.0154	0.031971	yes
Nkd1	chr8:88521343-88594887	sgNEG-sort2	sgTP63-sort2	OK	17.5332	14.204	-0.303791	-1.18298	0.0169	0.0348122	yes
Csrnp1	chr9:119971165-119984658	sgNEG-sort2	sgTP63-sort2	OK	145.951	118.28	-0.303279	-1.12281	0.02445	0.0488424	yes
Slc16a1	chr3:104638663-104658462	sgNEG-sort2	sgTP63-sort2	OK	32.4756	26.3489	-0.301614	-1.2057	0.0166	0.0342615	yes
Ier5	chr1:155096366-155099636	sgNEG-sort2	sgTP63-sort2	OK	84.2351	68.3754	-0.300944	-1.13741	0.02085	0.0421822	yes
Pelp1	chr11:70392880-70410031	sgNEG-sort2	sgTP63-sort2	OK	18.4918	15.0255	-0.299467	-1.15625	0.0197	0.040051	yes
Pcyox1	chr6:86386005-86397150	sgNEG-sort2	sgTP63-sort2	OK	61.8083	50.2512	-0.298641	-1.1622	0.0208	0.0420923	yes
Cd55	chr1:130439025-130462744	sgNEG-sort2	sgTP63-sort2	OK	52.5583	42.7659	-0.297458	-1.17903	0.0177	0.0363056	yes
Serpinb1a	chr13:32842091-32851185	sgNEG-sort2	sgTP63-sort2	OK	31.6902	25.8029	-0.296505	-1.13518	0.0234	0.0468876	yes
Ifrd1	chr12:40203128-40223189	sgNEG-sort2	sgTP63-sort2	OK	143.524	116.893	-0.2961	-1.15866	0.0178	0.0364938	yes
Ccnl1	chr3:65946150-65958225	sgNEG-sort2	sgTP63-sort2	OK	112.36	91.5692	-0.295193	-1.16185	0.01985	0.0403244	yes
Abl2	chr1:156558786-156649619	sgNEG-sort2	sgTP63-sort2	OK	10.3485	8.43683	-0.294652	-1.18166	0.017	0.035001	yes
Hivep2	chr10:13966378-14151378	sgNEG-sort2	sgTP63-sort2	OK	11.0749	9.02994	-0.294511	-1.18299	0.01615	0.0334086	yes
Sdpr	chr1:51289125-51302960	sgNEG-sort2	sgTP63-sort2	OK	30.8628	25.1945	-0.292763	-1.17021	0.0185	0.0378047	yes
Tpp1	chr7:105744815-105752235	sgNEG-sort2	sgTP63-sort2	OK	24.3906	19.9117	-0.292707	-1.15115	0.0212	0.0428318	yes
Crip1	chr12:113152011-113153879	sgNEG-sort2	sgTP63-sort2	OK	1059.73	866.204	-0.290915	-1.13286	0.0212	0.0428318	yes
Sdk1	chr5:141241533-142213791	sgNEG-sort2	sgTP63-sort2	OK	9.2475	7.56775	-0.2892	-1.12557	0.0227	0.0455902	yes
Frmd6	chr12:70825513-70902234	sgNEG-sort2	sgTP63-sort2	OK	39.3961	32.2799	-0.287415	-1.14534	0.01875	0.0382742	yes
Dclk1	chr3:55242525-55539068	sgNEG-sort2	sgTP63-sort2	OK	19.5691	16.1047	-0.281096	-1.12102	0.0244	0.0487503	yes
Cfi	chr3:129836738-129875328	sgNEG-sort2	sgTP63-sort2	OK	50.7563	41.8271	-0.279149	-1.11331	0.02465	0.0492107	yes

## Sheet: immune sort sig DOWN
gene_id	locus	sample_1	sample_2	status	value_1	value_2	log2(fold_change)	test_stat	p_value	q_value	significant
Gcg	chr2:62474529-62483653	sgNEG-sort3	sgTP63-sort3	OK	9.65452	0.214086	-5.49494	-4.81453	5e-05	0.000143687	yes
Hbb-b2	chr7:103812523-103813923	sgNEG-sort3	sgTP63-sort3	OK	14.9844	1.38778	-3.43261	-4.22773	5e-05	0.000143687	yes
Ins1	chr19:52264296-52265009	sgNEG-sort3	sgTP63-sort3	OK	70.504	6.7726	-3.37992	-6.52994	5e-05	0.000143687	yes
Hbb-b1	chr7:103826522-103827929	sgNEG-sort3	sgTP63-sort3	OK	36.7499	3.5608	-3.36747	-5.68007	5e-05	0.000143687	yes
Ins2	chr7:142678655-142679726	sgNEG-sort3	sgTP63-sort3	OK	149.017	17.0006	-3.13182	-6.01608	5e-05	0.000143687	yes
Nkg7	chr7:43437137-43438246	sgNEG-sort3	sgTP63-sort3	OK	3.73176	0.771708	-2.27373	-2.40589	5e-05	0.000143687	yes
Slc45a3	chr1:131962914-131982972	sgNEG-sort3	sgTP63-sort3	OK	4.99458	1.07221	-2.21978	-4.81494	5e-05	0.000143687	yes
Mpo	chr11:87793783-87804412	sgNEG-sort3	sgTP63-sort3	OK	48.0441	10.3663	-2.21246	-6.16482	5e-05	0.000143687	yes
Ctsg	chr14:56099884-56102574	sgNEG-sort3	sgTP63-sort3	OK	28.8361	6.40048	-2.17163	-4.87476	5e-05	0.000143687	yes
Dynlt1c	chr17:6646605-6655939	sgNEG-sort3	sgTP63-sort3	OK	2.8081	0.648226	-2.11502	-2.05438	0.00145	0.00353797	yes
Ms4a3	chr19:11629498-11640851	sgNEG-sort3	sgTP63-sort3	OK	10.8554	2.7793	-1.96562	-3.48222	5e-05	0.000143687	yes
Cmbl	chr15:31568911-31590119	sgNEG-sort3	sgTP63-sort3	OK	2.16753	0.614179	-1.81932	-2.03425	0.00045	0.00117468	yes
Spic	chr10:88675269-88683023	sgNEG-sort3	sgTP63-sort3	OK	15.0437	4.30232	-1.80597	-4.27703	5e-05	0.000143687	yes
Slc40a1	chr1:45908069-45925594	sgNEG-sort3	sgTP63-sort3	OK	29.7506	8.61589	-1.78785	-6.39132	5e-05	0.000143687	yes
Elane	chr10:79886311-79888216	sgNEG-sort3	sgTP63-sort3	OK	44.1895	13.8522	-1.67359	-4.17383	5e-05	0.000143687	yes
Itgad	chr7:128173945-128206366	sgNEG-sort3	sgTP63-sort3	OK	13.9739	4.54592	-1.62009	-5.29629	5e-05	0.000143687	yes
Stfa2	chr16:36403945-36408363	sgNEG-sort3	sgTP63-sort3	OK	10.2819	3.38351	-1.60352	-1.93962	0.0004	0.00105048	yes
Ccr3	chr9:124021970-124031689	sgNEG-sort3	sgTP63-sort3	OK	4.71804	1.5817	-1.57671	-3.74567	5e-05	0.000143687	yes
Abca13	chr11:9191941-9684259	sgNEG-sort3	sgTP63-sort3	OK	2.09574	0.707526	-1.56661	-4.35131	5e-05	0.000143687	yes
Car2	chr3:14886425-14900770	sgNEG-sort3	sgTP63-sort3	OK	4.84384	1.77152	-1.45116	-2.77795	5e-05	0.000143687	yes
Prtn3	chr10:79879666-79883172	sgNEG-sort3	sgTP63-sort3	OK	75.1765	28.3709	-1.40587	-4.67268	5e-05	0.000143687	yes
Adamdec1	chr14:68563386-68582072	sgNEG-sort3	sgTP63-sort3	OK	2.94647	1.12367	-1.39078	-2.57687	5e-05	0.000143687	yes
Wfdc21	chr11:83746939-83752646	sgNEG-sort3	sgTP63-sort3	OK	160.338	61.5316	-1.38172	-3.92692	5e-05	0.000143687	yes
Myb	chr10:21124929-21160984	sgNEG-sort3	sgTP63-sort3	OK	2.0945	0.823912	-1.34605	-2.55632	5e-05	0.000143687	yes
Stfa3	chr16:36450536-36455392	sgNEG-sort3	sgTP63-sort3	OK	5.41912	2.15206	-1.33234	-1.46881	0.0144	0.0300486	yes
Gpd1	chr15:99717592-99725007	sgNEG-sort3	sgTP63-sort3	OK	2.92056	1.17054	-1.31907	-2.65501	5e-05	0.000143687	yes
Orm1	chr4:63344555-63348163	sgNEG-sort3	sgTP63-sort3	OK	3.43083	1.38111	-1.31273	-1.63729	0.00505	0.0113908	yes
Bmx	chrX:164192841-164258193	sgNEG-sort3	sgTP63-sort3	OK	4.50796	1.8489	-1.28581	-3.01924	5e-05	0.000143687	yes
Olfm4	chr14:80000301-80021930	sgNEG-sort3	sgTP63-sort3	OK	24.0032	10.1351	-1.24387	-3.86006	5e-05	0.000143687	yes
Camp	chr9:109847376-109849456	sgNEG-sort3	sgTP63-sort3	OK	853.749	361.779	-1.2387	-3.23545	5e-05	0.000143687	yes
Ngp	chr9:110419807-110423012	sgNEG-sort3	sgTP63-sort3	OK	1294.14	554.353	-1.22312	-2.25457	5e-05	0.000143687	yes
BC049730	chr7:24709258-24714535	sgNEG-sort3	sgTP63-sort3	OK	2.92989	1.25992	-1.21751	-1.75822	0.00105	0.00261247	yes
Ltf	chr9:111019291-111042766	sgNEG-sort3	sgTP63-sort3	OK	381.962	165.005	-1.21092	-2.47979	5e-05	0.000143687	yes
Rdh12	chr12:79208912-79222664	sgNEG-sort3	sgTP63-sort3	OK	3.43732	1.51799	-1.17912	-2.07294	0.0002	0.000543624	yes
Ciart	chr3:95878504-95882228	sgNEG-sort3	sgTP63-sort3	OK	2.7013	1.2051	-1.1645	-1.77948	0.00085	0.00214082	yes
Chil3	chr3:106147553-106167564	sgNEG-sort3	sgTP63-sort3	OK	385.895	174.771	-1.14274	-3.43583	5e-05	0.000143687	yes
Mmp8	chr9:7558428-7568486	sgNEG-sort3	sgTP63-sort3	OK	54.652	24.8644	-1.13619	-3.91209	5e-05	0.000143687	yes
Tmem26	chr10:68723745-68782654	sgNEG-sort3	sgTP63-sort3	OK	2.88982	1.32774	-1.12201	-2.81156	5e-05	0.000143687	yes
Acpp	chr9:104288239-104337722	sgNEG-sort3	sgTP63-sort3	OK	2.47374	1.14451	-1.11196	-2.31374	5e-05	0.000143687	yes
S100a8	chr3:90669070-90670034	sgNEG-sort3	sgTP63-sort3	OK	6856.73	3187.29	-1.10519	-2.43588	5e-05	0.000143687	yes
Lcn2	chr2:32384636-32387739	sgNEG-sort3	sgTP63-sort3	OK	603.06	281.142	-1.101	-3.08355	5e-05	0.000143687	yes
Sgms2	chr3:131318985-131344923	sgNEG-sort3	sgTP63-sort3	OK	9.80031	4.58464	-1.09602	-3.80665	5e-05	0.000143687	yes
Zfand4	chr6:116264218-116330304	sgNEG-sort3	sgTP63-sort3	OK	2.7616	1.29206	-1.09584	-2.32268	5e-05	0.000143687	yes
Ccno	chr13:112987801-112990778	sgNEG-sort3	sgTP63-sort3	OK	6.30227	2.98501	-1.07813	-2.48084	5e-05	0.000143687	yes
Scnn1a	chr6:125321339-125344942	sgNEG-sort3	sgTP63-sort3	OK	2.21485	1.06532	-1.05593	-2.17235	5e-05	0.000143687	yes
S100a9	chr3:90692629-90695721	sgNEG-sort3	sgTP63-sort3	OK	8898.8	4291.98	-1.05197	-1.72527	0.0006	0.00154109	yes
Ankrd22	chr19:34100942-34166041	sgNEG-sort3	sgTP63-sort3	OK	3.68452	1.78635	-1.04446	-1.916	0.00015	0.000413012	yes
Slco4c1	chr1:96818783-96872171	sgNEG-sort3	sgTP63-sort3	OK	2.8458	1.38402	-1.03997	-1.96605	0.00025	0.000672292	yes
Prom1	chr5:43993621-44101736	sgNEG-sort3	sgTP63-sort3	OK	2.84583	1.38446	-1.03952	-2.18816	5e-05	0.000143687	yes
Hpgd	chr8:56294551-56321046	sgNEG-sort3	sgTP63-sort3	OK	5.38021	2.62512	-1.03528	-2.22439	5e-05	0.000143687	yes
Fkbp5	chr17:28398752-28486149	sgNEG-sort3	sgTP63-sort3	OK	32.7185	15.966	-1.0351	-3.58517	5e-05	0.000143687	yes
Abcg3	chr5:104935056-104982717	sgNEG-sort3	sgTP63-sort3	OK	10.0956	4.92983	-1.03411	-3.23445	5e-05	0.000143687	yes
BC100530	chr16:36359381-36367570	sgNEG-sort3	sgTP63-sort3	OK	19.9198	9.81471	-1.02119	-1.75176	0.00145	0.00353797	yes
Erg	chr16:95359168-95586593	sgNEG-sort3	sgTP63-sort3	OK	2.44015	1.20377	-1.0194	-2.04526	0.0001	0.000280029	yes
Rfx2	chr17:56775896-56831008	sgNEG-sort3	sgTP63-sort3	OK	5.93679	2.96094	-1.00363	-2.81435	5e-05	0.000143687	yes
Gfra2	chr14:70890106-70979840	sgNEG-sort3	sgTP63-sort3	OK	3.6091	1.82554	-0.983314	-2.31222	5e-05	0.000143687	yes
Vcam1	chr3:116110019-116129688	sgNEG-sort3	sgTP63-sort3	OK	99.8424	50.7549	-0.976106	-3.67419	5e-05	0.000143687	yes
Arhgef37	chr18:61493793-61536536	sgNEG-sort3	sgTP63-sort3	OK	5.96121	3.03965	-0.971699	-2.705	5e-05	0.000143687	yes
Cd300e	chr11:115051916-115062038	sgNEG-sort3	sgTP63-sort3	OK	3.50875	1.78971	-0.971231	-1.90682	0.0003	0.000799291	yes
Serpinb10	chr1:107529002-107549271	sgNEG-sort3	sgTP63-sort3	OK	5.26012	2.69208	-0.966372	-2.59527	5e-05	0.000143687	yes
Rnf125	chr18:20944624-20983848	sgNEG-sort3	sgTP63-sort3	OK	2.3307	1.19409	-0.964858	-1.42455	0.0068	0.015031	yes
Itgb2l	chr16:96422297-96443614	sgNEG-sort3	sgTP63-sort3	OK	4.44213	2.29947	-0.949948	-2.06878	0.0003	0.000799291	yes
Dhrs9	chr2:69380461-69403086	sgNEG-sort3	sgTP63-sort3	OK	21.4367	11.1095	-0.948294	-3.37721	5e-05	0.000143687	yes
Serpinb2	chr1:107511422-107525600	sgNEG-sort3	sgTP63-sort3	OK	4.31717	2.25065	-0.939746	-1.99126	0.00015	0.000413012	yes
Entpd3	chr9:120539817-120568326	sgNEG-sort3	sgTP63-sort3	OK	28.1648	14.7378	-0.934377	-3.47407	5e-05	0.000143687	yes
Pglyrp1	chr7:18884689-18890438	sgNEG-sort3	sgTP63-sort3	OK	160.567	84.8942	-0.919435	-3.11089	5e-05	0.000143687	yes
Mgst2	chr3:51661178-51682674	sgNEG-sort3	sgTP63-sort3	OK	9.87394	5.30628	-0.895925	-1.33179	0.0105	0.0224688	yes
Cd177	chr7:24743982-24760311	sgNEG-sort3	sgTP63-sort3	OK	100.381	54.3007	-0.886437	-3.08622	5e-05	0.000143687	yes
Adgre4	chr17:55749983-55853662	sgNEG-sort3	sgTP63-sort3	OK	26.1968	14.1944	-0.884071	-3.38038	5e-05	0.000143687	yes
Mrgpra2a	chr7:47426328-47452139	sgNEG-sort3	sgTP63-sort3	OK	3.54744	1.9237	-0.882893	-1.46199	0.0058	0.0129602	yes
Rnf144a	chr12:26306793-26415262	sgNEG-sort3	sgTP63-sort3	OK	6.53822	3.55684	-0.878304	-2.83543	5e-05	0.000143687	yes
Epb41l3	chr17:69156809-69289987	sgNEG-sort3	sgTP63-sort3	OK	3.12704	1.70273	-0.876949	-2.17669	5e-05	0.000143687	yes
Tmem40	chr6:115729136-115762466	sgNEG-sort3	sgTP63-sort3	OK	3.30635	1.80163	-0.875939	-1.36437	0.0067	0.0148286	yes
Depdc1b	chr13:108316336-108389557	sgNEG-sort3	sgTP63-sort3	OK	2.01913	1.10415	-0.870804	-1.54137	0.00335	0.00775772	yes
Cyp2ab1	chr16:20308386-20325404	sgNEG-sort3	sgTP63-sort3	OK	2.14926	1.17752	-0.868088	-1.64242	0.0017	0.00410919	yes
Rhov	chr2:119269200-119271226	sgNEG-sort3	sgTP63-sort3	OK	4.25509	2.33878	-0.863433	-1.73469	0.0007	0.0017835	yes
Dnase1l3	chr14:7965189-7994182	sgNEG-sort3	sgTP63-sort3	OK	3.68688	2.03642	-0.856367	-2.18155	5e-05	0.000143687	yes
Steap4	chr5:7960471-7982213	sgNEG-sort3	sgTP63-sort3	OK	17.6654	9.76096	-0.855834	-3.04736	5e-05	0.000143687	yes
Ace	chr11:105967944-105989964	sgNEG-sort3	sgTP63-sort3	OK	14.725	8.13832	-0.855464	-3.15148	5e-05	0.000143687	yes
Ccdc88c	chr12:100912699-101028983	sgNEG-sort3	sgTP63-sort3	OK	7.59593	4.21595	-0.849368	-2.97978	5e-05	0.000143687	yes
Sort1	chr3:108284063-108361519	sgNEG-sort3	sgTP63-sort3	OK	18.8552	10.47	-0.848705	-3.35694	5e-05	0.000143687	yes
Itga1	chr13:114958080-115101964	sgNEG-sort3	sgTP63-sort3	OK	3.13376	1.742	-0.847154	-2.05905	5e-05	0.000143687	yes
Serpinb1a	chr13:32842091-32851185	sgNEG-sort3	sgTP63-sort3	OK	25.2254	14.0274	-0.846625	-2.88304	5e-05	0.000143687	yes
Slpi	chr2:164354069-164356507	sgNEG-sort3	sgTP63-sort3	OK	105.745	58.8093	-0.846476	-3.19472	5e-05	0.000143687	yes
Msantd3	chr4:48539945-48561920	sgNEG-sort3	sgTP63-sort3	OK	2.78779	1.55497	-0.84224	-1.42888	0.00545	0.0122269	yes
Arg2	chr12:79130787-79172458	sgNEG-sort3	sgTP63-sort3	OK	41.9105	23.4552	-0.837407	-1.72969	0.003	0.00700046	yes
Dgat2	chr7:99153662-99182713	sgNEG-sort3	sgTP63-sort3	OK	23.7061	13.27	-0.83709	-2.97924	5e-05	0.000143687	yes
Tarm1	chr7:3489075-3502552	sgNEG-sort3	sgTP63-sort3	OK	23.0049	12.8996	-0.834619	-2.34602	5e-05	0.000143687	yes
Gdf15	chr8:70629393-70631635	sgNEG-sort3	sgTP63-sort3	OK	35.2258	19.8292	-0.829007	-2.67606	5e-05	0.000143687	yes
Nlrp12	chr7:3221509-3249740	sgNEG-sort3	sgTP63-sort3	OK	8.27907	4.67465	-0.824612	-2.69757	5e-05	0.000143687	yes
Stfa2l1	chr16:36156810-36161948	sgNEG-sort3	sgTP63-sort3	OK	69.6394	39.5175	-0.817412	-2.15242	5e-05	0.000143687	yes
Inhba	chr13:16014474-16027211	sgNEG-sort3	sgTP63-sort3	OK	3.41911	1.94525	-0.813662	-1.46807	0.00395	0.00905714	yes
Cnnm2	chr19:46761608-46878580	sgNEG-sort3	sgTP63-sort3	OK	7.96773	4.53606	-0.812728	-2.53205	5e-05	0.000143687	yes
Ptger3	chr3:157566891-157644758	sgNEG-sort3	sgTP63-sort3	OK	3.01746	1.71987	-0.811038	-1.56646	0.00255	0.00600965	yes
Chac1	chr2:119351241-119354327	sgNEG-sort3	sgTP63-sort3	OK	2.01038	1.14698	-0.809627	-1.23826	0.01195	0.0253083	yes
Rasgrp2	chr19:6400582-6415216	sgNEG-sort3	sgTP63-sort3	OK	17.3926	9.93616	-0.807716	-2.7092	5e-05	0.000143687	yes
Hp	chr8:109575127-109579172	sgNEG-sort3	sgTP63-sort3	OK	405.037	232.418	-0.801336	-2.90125	5e-05	0.000143687	yes
Retnlg	chr16:48872607-48874498	sgNEG-sort3	sgTP63-sort3	OK	394.907	227.66	-0.794632	-2.63132	5e-05	0.000143687	yes
Fam101b	chr11:76019194-76027782	sgNEG-sort3	sgTP63-sort3	OK	11.2149	6.46683	-0.794291	-2.6427	5e-05	0.000143687	yes
Gpr141	chr13:19749681-19824257	sgNEG-sort3	sgTP63-sort3	OK	17.0888	9.87592	-0.791065	-2.91151	5e-05	0.000143687	yes
Slc7a11	chr3:50364935-50443613	sgNEG-sort3	sgTP63-sort3	OK	6.03338	3.48769	-0.790694	-2.8813	5e-05	0.000143687	yes
Cd5l	chr3:87357880-87371074	sgNEG-sort3	sgTP63-sort3	OK	23.6161	13.6882	-0.786833	-2.63334	5e-05	0.000143687	yes
Mrgpra2b	chr7:47463806-47489582	sgNEG-sort3	sgTP63-sort3	OK	3.21235	1.86545	-0.78411	-1.28466	0.01095	0.0233602	yes
Ifitm1	chr7:140967428-140969827	sgNEG-sort3	sgTP63-sort3	OK	240.435	139.736	-0.782946	-3.10782	5e-05	0.000143687	yes
Gca	chr2:62664326-62694109	sgNEG-sort3	sgTP63-sort3	OK	8.2746	4.81216	-0.782006	-2.42869	5e-05	0.000143687	yes
Slc2a3	chr6:122727808-122742745	sgNEG-sort3	sgTP63-sort3	OK	25.0121	14.5535	-0.78126	-2.93869	5e-05	0.000143687	yes
Il1r2	chr1:40084767-40125226	sgNEG-sort3	sgTP63-sort3	OK	333.167	194.051	-0.779805	-2.78039	5e-05	0.000143687	yes
Gm5483	chr16:36184211-36188110	sgNEG-sort3	sgTP63-sort3	OK	30.2512	17.6448	-0.777747	-1.57365	0.0021	0.00501456	yes
Olfr665	chr7:104880708-104881659	sgNEG-sort3	sgTP63-sort3	OK	3.49193	2.04284	-0.773449	-1.16422	0.0233	0.0467095	yes
Stk26	chrX:50841370-50942710	sgNEG-sort3	sgTP63-sort3	OK	5.91254	3.47351	-0.767383	-2.19563	5e-05	0.000143687	yes
F5	chr1:164151834-164220277	sgNEG-sort3	sgTP63-sort3	OK	7.79447	4.60359	-0.759693	-2.79048	5e-05	0.000143687	yes
A430078G23Rik	chr8:3353414-3390299	sgNEG-sort3	sgTP63-sort3	OK	2.17238	1.28417	-0.758438	-1.52069	0.00255	0.00600965	yes
Mapk13	chr17:28769316-28778704	sgNEG-sort3	sgTP63-sort3	OK	15.5638	9.20575	-0.757587	-2.12992	5e-05	0.000143687	yes
B3gnt5	chr16:19760233-19772753	sgNEG-sort3	sgTP63-sort3	OK	18.2575	10.8024	-0.757139	-2.89904	5e-05	0.000143687	yes
Sema6d	chr2:124089968-124667789	sgNEG-sort3	sgTP63-sort3	OK	4.56204	2.70162	-0.755853	-2.37229	5e-05	0.000143687	yes
Nfe2	chr15:103248211-103258403	sgNEG-sort3	sgTP63-sort3	OK	19.9891	11.8678	-0.752158	-2.32475	5e-05	0.000143687	yes
Ica1	chr6:8630526-8778484	sgNEG-sort3	sgTP63-sort3	OK	2.10787	1.25254	-0.750929	-1.14152	0.0224	0.0450476	yes
Ly6g	chr15:75155260-75159128	sgNEG-sort3	sgTP63-sort3	OK	41.4426	24.6891	-0.747242	-2.09616	0.00015	0.000413012	yes
Cd244	chr1:171559192-171585316	sgNEG-sort3	sgTP63-sort3	OK	15.8708	9.47716	-0.743851	-2.75907	5e-05	0.000143687	yes
Crispld2	chr8:119992437-120052794	sgNEG-sort3	sgTP63-sort3	OK	9.89743	5.92862	-0.739357	-2.56819	5e-05	0.000143687	yes
Nrg1	chr8:31818027-31918203	sgNEG-sort3	sgTP63-sort3	OK	9.3336	5.60568	-0.735543	-2.11264	0.0001	0.000280029	yes
Rab44	chr17:29135055-29148976	sgNEG-sort3	sgTP63-sort3	OK	14.6159	8.78621	-0.734225	-2.68496	5e-05	0.000143687	yes
Treml4	chr17:48264294-48275358	sgNEG-sort3	sgTP63-sort3	OK	26.8489	16.2301	-0.72619	-2.52189	5e-05	0.000143687	yes
Vcan	chr13:89655309-89742512	sgNEG-sort3	sgTP63-sort3	OK	40.2339	24.3664	-0.72352	-2.5908	5e-05	0.000143687	yes
Fabp4	chr3:10204342-10208576	sgNEG-sort3	sgTP63-sort3	OK	23.6525	14.3585	-0.720093	-1.74061	0.0006	0.00154109	yes
Mcemp1	chr8:3665761-3668905	sgNEG-sort3	sgTP63-sort3	OK	84.4127	51.2632	-0.719537	-2.74914	5e-05	0.000143687	yes
Pik3ip1	chr11:3330730-3342971	sgNEG-sort3	sgTP63-sort3	OK	3.26478	1.98731	-0.71617	-1.50058	0.0038	0.00873416	yes
Megf9	chr4:70431926-70534928	sgNEG-sort3	sgTP63-sort3	OK	8.24413	5.02209	-0.715078	-2.17282	5e-05	0.000143687	yes
Dennd4a	chr9:64811010-64919667	sgNEG-sort3	sgTP63-sort3	OK	32.5534	19.956	-0.70598	-2.72364	5e-05	0.000143687	yes
Trem3	chr17:48247728-48258847	sgNEG-sort3	sgTP63-sort3	OK	38.8494	23.8773	-0.702252	-2.34338	5e-05	0.000143687	yes
Tacstd2	chr6:67534058-67535822	sgNEG-sort3	sgTP63-sort3	OK	9.26957	5.71739	-0.697144	-1.88424	0.0002	0.000543624	yes
Fam160a2	chr7:105371210-105400054	sgNEG-sort3	sgTP63-sort3	OK	3.31242	2.04751	-0.694016	-2.38672	5e-05	0.000143687	yes
Ddit4	chr10:59949674-59951770	sgNEG-sort3	sgTP63-sort3	OK	32.1395	20.0595	-0.68006	-2.48681	5e-05	0.000143687	yes
Tbc1d10c	chr19:4184356-4191047	sgNEG-sort3	sgTP63-sort3	OK	8.59447	5.36883	-0.678801	-1.78854	0.00065	0.00166194	yes
Il18rap	chr1:40515361-40551705	sgNEG-sort3	sgTP63-sort3	OK	22.7258	14.2155	-0.676867	-2.6186	5e-05	0.000143687	yes
Gk5	chr9:96119428-96182953	sgNEG-sort3	sgTP63-sort3	OK	2.37093	1.48536	-0.674637	-1.38531	0.00675	0.0149287	yes
Hmgb2	chr8:57511842-57515999	sgNEG-sort3	sgTP63-sort3	OK	14.2494	8.93502	-0.673357	-2.31429	5e-05	0.000143687	yes
Dgat1	chr15:76502014-76511818	sgNEG-sort3	sgTP63-sort3	OK	95.8067	60.2113	-0.670093	-2.62058	5e-05	0.000143687	yes
Hdc	chr2:126593659-126618678	sgNEG-sort3	sgTP63-sort3	OK	204.352	128.884	-0.664984	-2.27172	5e-05	0.000143687	yes
Anxa1	chr19:20373433-20390671	sgNEG-sort3	sgTP63-sort3	OK	465.842	295.825	-0.655096	-2.17462	5e-05	0.000143687	yes
Adgrg3	chr8:95017691-95045249	sgNEG-sort3	sgTP63-sort3	OK	9.94668	6.31715	-0.65494	-1.96214	0.00015	0.000413012	yes
Ube2c	chr2:164769928-164772902	sgNEG-sort3	sgTP63-sort3	OK	18.4175	11.7134	-0.652921	-1.72279	0.00085	0.00214082	yes
Sgms1	chr19:32122726-32388454	sgNEG-sort3	sgTP63-sort3	OK	44.0496	28.0216	-0.652588	-2.60208	5e-05	0.000143687	yes
Cebpe	chr14:54710362-54712174	sgNEG-sort3	sgTP63-sort3	OK	7.29721	4.64416	-0.651929	-1.36258	0.0074	0.0162734	yes
Rgcc	chr14:79288749-79301635	sgNEG-sort3	sgTP63-sort3	OK	37.255	23.7327	-0.650556	-2.10251	5e-05	0.000143687	yes
Lrg1	chr17:56119677-56121946	sgNEG-sort3	sgTP63-sort3	OK	243.605	155.781	-0.645023	-2.37103	5e-05	0.000143687	yes
Fbxo32	chr15:58175878-58214892	sgNEG-sort3	sgTP63-sort3	OK	4.30593	2.76146	-0.640895	-2.12392	5e-05	0.000143687	yes
Trem1	chr17:48232738-48246924	sgNEG-sort3	sgTP63-sort3	OK	350.054	224.793	-0.638976	-1.96269	0.0001	0.000280029	yes
Igf1r	chr7:67952256-68233667	sgNEG-sort3	sgTP63-sort3	OK	7.25539	4.66181	-0.638162	-2.47882	5e-05	0.000143687	yes
Ipcef1	chr10:6758592-7038209	sgNEG-sort3	sgTP63-sort3	OK	6.65166	4.2796	-0.636241	-1.90677	0.00035	0.000925354	yes
Gadd45a	chr6:67035095-67037407	sgNEG-sort3	sgTP63-sort3	OK	55.3401	35.6439	-0.634671	-2.32783	5e-05	0.000143687	yes
Il1f9	chr2:24186475-24193567	sgNEG-sort3	sgTP63-sort3	OK	39.2188	25.2684	-0.634214	-2.30751	5e-05	0.000143687	yes
Adpgk	chr9:59291571-59316200	sgNEG-sort3	sgTP63-sort3	OK	42.5426	27.4536	-0.631911	-2.31912	5e-05	0.000143687	yes
Rrm2	chr12:24708253-24714146	sgNEG-sort3	sgTP63-sort3	OK	13.5275	8.74581	-0.629234	-2.0056	5e-05	0.000143687	yes
Snai1	chr2:167538194-167542811	sgNEG-sort3	sgTP63-sort3	OK	9.6958	6.27515	-0.627709	-1.68227	0.00085	0.00214082	yes
Cxcl3	chr5:90786100-90788093	sgNEG-sort3	sgTP63-sort3	OK	18.3024	11.8621	-0.625669	-1.7099	0.00095	0.00237754	yes
Bend4	chr5:67392146-67427799	sgNEG-sort3	sgTP63-sort3	OK	9.62042	6.25229	-0.621715	-2.41154	5e-05	0.000143687	yes
Vdr	chr15:97854426-97908296	sgNEG-sort3	sgTP63-sort3	OK	9.93227	6.46625	-0.619194	-2.20214	5e-05	0.000143687	yes
Ctdspl	chr9:118926535-119044119	sgNEG-sort3	sgTP63-sort3	OK	4.49287	2.92569	-0.618862	-1.85863	0.0002	0.000543624	yes
Hsd11b1	chr1:193221640-193264045	sgNEG-sort3	sgTP63-sort3	OK	13.1789	8.58426	-0.618465	-1.66896	0.00105	0.00261247	yes
Carns1	chr19:4164323-4175479	sgNEG-sort3	sgTP63-sort3	OK	2.17424	1.41961	-0.615014	-1.40452	0.0059	0.0131684	yes
Myo10	chr15:25622549-25813671	sgNEG-sort3	sgTP63-sort3	OK	4.24332	2.77112	-0.614724	-2.08502	5e-05	0.000143687	yes
Spry2	chr14:105891946-105896819	sgNEG-sort3	sgTP63-sort3	OK	6.27402	4.11022	-0.610173	-1.57266	0.00215	0.00512552	yes
Rnd1	chr15:98669204-98677461	sgNEG-sort3	sgTP63-sort3	OK	7.82154	5.12783	-0.609103	-1.7084	0.0008	0.00202265	yes
Ly75	chr2:60293759-60383231	sgNEG-sort3	sgTP63-sort3	OK	4.64578	3.04631	-0.608857	-1.87938	0.00035	0.000925354	yes
Mxd1	chr6:86647044-86669159	sgNEG-sort3	sgTP63-sort3	OK	171.988	112.874	-0.607599	-1.95589	0.00015	0.000413012	yes
Tcp11l2	chr10:84576946-84614355	sgNEG-sort3	sgTP63-sort3	OK	55.5822	36.5394	-0.60517	-2.41765	5e-05	0.000143687	yes
Il1rap	chr16:26581704-26725147	sgNEG-sort3	sgTP63-sort3	OK	24.9921	16.4939	-0.599536	-2.27246	5e-05	0.000143687	yes
Prnp	chr2:131909927-131956131	sgNEG-sort3	sgTP63-sort3	OK	59.9874	39.6202	-0.598426	-2.39354	5e-05	0.000143687	yes
Ube2h	chr6:30211289-30304539	sgNEG-sort3	sgTP63-sort3	OK	18.156	12.0239	-0.594539	-2.31326	5e-05	0.000143687	yes
Pecam1	chr11:106654212-106715281	sgNEG-sort3	sgTP63-sort3	OK	15.746	10.4452	-0.59214	-2.15363	5e-05	0.000143687	yes
Tnfsf14	chr17:57189473-57194181	sgNEG-sort3	sgTP63-sort3	OK	23.2706	15.4409	-0.591757	-2.10149	5e-05	0.000143687	yes
Frat2	chr19:41845975-41848132	sgNEG-sort3	sgTP63-sort3	OK	6.90316	4.60238	-0.584877	-1.57714	0.00185	0.00445025	yes
Klf9	chr19:23141225-23166911	sgNEG-sort3	sgTP63-sort3	OK	12.5474	8.37834	-0.582653	-2.01934	0.0001	0.000280029	yes
F10	chr8:13037307-13056676	sgNEG-sort3	sgTP63-sort3	OK	23.8392	15.9328	-0.581339	-2.17089	5e-05	0.000143687	yes
Ets1	chr9:32696041-32757820	sgNEG-sort3	sgTP63-sort3	OK	5.54263	3.71328	-0.577878	-1.8709	5e-05	0.000143687	yes
Cxcr2	chr1:74153993-74161246	sgNEG-sort3	sgTP63-sort3	OK	122.106	81.8251	-0.577512	-2.06725	5e-05	0.000143687	yes
Syne1	chr10:5336948-5550692	sgNEG-sort3	sgTP63-sort3	OK	14.0006	9.04296	-0.574387	-2.40195	0.0001	0.000280029	yes
Ntng2	chr2:29194725-29248099	sgNEG-sort3	sgTP63-sort3	OK	15.6072	10.5047	-0.571172	-1.85037	0.0004	0.00105048	yes
Fndc1	chr17:7738567-7804974	sgNEG-sort3	sgTP63-sort3	OK	3.15117	2.12757	-0.566681	-1.65303	0.001	0.00249506	yes
Pygl	chr12:70190814-70227683	sgNEG-sort3	sgTP63-sort3	OK	67.3797	45.5105	-0.566114	-2.21434	5e-05	0.000143687	yes
Sec22c	chr9:121680044-121705029	sgNEG-sort3	sgTP63-sort3	OK	2.74969	1.85906	-0.564692	-1.57675	0.0018	0.00433591	yes
Tmem154	chr3:84666191-84704575	sgNEG-sort3	sgTP63-sort3	OK	13.8564	9.37197	-0.564127	-2.03102	0.00015	0.000413012	yes
Emb	chr13:117220572-117274415	sgNEG-sort3	sgTP63-sort3	OK	121.491	82.2334	-0.563052	-2.19126	5e-05	0.000143687	yes
Id1	chr2:152736250-152737410	sgNEG-sort3	sgTP63-sort3	OK	40.615	27.5437	-0.560288	-1.87328	0.0002	0.000543624	yes
Jmy	chr13:93430096-93499808	sgNEG-sort3	sgTP63-sort3	OK	8.11345	5.52067	-0.555474	-2.15781	5e-05	0.000143687	yes
Gpr55	chr1:85939536-85961055	sgNEG-sort3	sgTP63-sort3	OK	5.44505	3.71341	-0.552198	-1.46487	0.00395	0.00905714	yes
Prkcg	chr7:3303531-3331097	sgNEG-sort3	sgTP63-sort3	OK	2.42696	1.65537	-0.551996	-1.19684	0.0173	0.0355546	yes
Pira7	chr7:3731632-3915501	sgNEG-sort3	sgTP63-sort3	OK	24.7481	16.8817	-0.551858	-1.39553	0.0055	0.0123281	yes
Amica1	chr9:45079182-45108531	sgNEG-sort3	sgTP63-sort3	OK	67.8621	46.4304	-0.547536	-2.15354	5e-05	0.000143687	yes
Map3k6	chr4:133240817-133252928	sgNEG-sort3	sgTP63-sort3	OK	2.05373	1.40543	-0.547234	-1.27212	0.01035	0.0221736	yes
Ramp3	chr11:6658532-6677475	sgNEG-sort3	sgTP63-sort3	OK	26.7101	18.2844	-0.546772	-1.79305	0.00045	0.00117468	yes
Ptpn22	chr3:103859794-103912252	sgNEG-sort3	sgTP63-sort3	OK	21.3712	14.6365	-0.546101	-2.0436	5e-05	0.000143687	yes
Satb1	chr17:51736186-51833290	sgNEG-sort3	sgTP63-sort3	OK	3.25289	2.23334	-0.542519	-1.64131	0.0013	0.00319448	yes
Gm9733	chr3:15296550-15332302	sgNEG-sort3	sgTP63-sort3	OK	68.3613	46.9887	-0.540867	-1.7957	0.0003	0.000799291	yes
Foxm1	chr6:128362993-128385144	sgNEG-sort3	sgTP63-sort3	OK	4.93176	3.3956	-0.538435	-1.64206	0.0013	0.00319448	yes
Gcnt2	chr13:40859767-40960892	sgNEG-sort3	sgTP63-sort3	OK	60.7032	41.8573	-0.536292	-2.0983	5e-05	0.000143687	yes
Dgkg	chr16:22466568-22657231	sgNEG-sort3	sgTP63-sort3	OK	4.73671	3.26777	-0.535579	-1.71624	0.00035	0.000925354	yes
Mctp2	chr7:72077829-72306595	sgNEG-sort3	sgTP63-sort3	OK	7.1886	4.97008	-0.532442	-1.8793	0.0002	0.000543624	yes
Dfna5	chr6:50207402-50261769	sgNEG-sort3	sgTP63-sort3	OK	6.73366	4.65556	-0.532436	-1.42197	0.0052	0.0117057	yes
Mmp19	chr10:128790909-128804370	sgNEG-sort3	sgTP63-sort3	OK	104.616	72.4906	-0.529243	-1.86206	0.00015	0.000413012	yes
Tspan2	chr3:102734769-102772310	sgNEG-sort3	sgTP63-sort3	OK	3.04272	2.1109	-0.527504	-1.37516	0.0064	0.0142109	yes
Cdk20	chr13:64432552-64439721	sgNEG-sort3	sgTP63-sort3	OK	5.80241	4.0267	-0.527057	-1.2758	0.0122	0.0257864	yes
Atp11a	chr8:12757015-12868728	sgNEG-sort3	sgTP63-sort3	OK	22.5686	15.6637	-0.52689	-2.12048	5e-05	0.000143687	yes
Pnpla2	chr7:141455187-141460743	sgNEG-sort3	sgTP63-sort3	OK	41.1818	28.6763	-0.522149	-2.09131	5e-05	0.000143687	yes
Zfyve9	chr4:108639258-108723876	sgNEG-sort3	sgTP63-sort3	OK	6.8775	4.79346	-0.520817	-1.40764	0.0054	0.0121238	yes
Kif11	chr19:37376402-37421859	sgNEG-sort3	sgTP63-sort3	OK	4.42581	3.0857	-0.520344	-1.5761	0.00165	0.00399511	yes
Slc12a2	chr18:57878677-57946821	sgNEG-sort3	sgTP63-sort3	OK	3.81535	2.66069	-0.520015	-1.6578	0.00065	0.00166194	yes
Jag2	chr12:112908589-112929495	sgNEG-sort3	sgTP63-sort3	OK	9.35394	6.5234	-0.519949	-1.82715	0.00025	0.000672292	yes
Sycp2	chr2:178345295-178407658	sgNEG-sort3	sgTP63-sort3	OK	4.17153	2.91316	-0.51799	-1.60915	0.00155	0.0037676	yes
Pi16	chr17:29318881-29328902	sgNEG-sort3	sgTP63-sort3	OK	38.8622	27.1464	-0.517607	-2.00276	0.0001	0.000280029	yes
Itgal	chr7:127296259-127335137	sgNEG-sort3	sgTP63-sort3	OK	52.1425	36.4465	-0.516678	-1.9764	0.0001	0.000280029	yes
Upp1	chr11:9118007-9136170	sgNEG-sort3	sgTP63-sort3	OK	7.20645	5.04144	-0.515454	-1.15228	0.0207	0.0419046	yes
Eva1b	chr4:126148002-126149874	sgNEG-sort3	sgTP63-sort3	OK	9.06465	6.34337	-0.515002	-1.29045	0.0095	0.0205009	yes
Clec4d	chr6:123262106-123275268	sgNEG-sort3	sgTP63-sort3	OK	197.978	138.68	-0.513586	-1.99098	0.0001	0.000280029	yes
Atp2a3	chr11:72961168-72993043	sgNEG-sort3	sgTP63-sort3	OK	18.8011	13.1705	-0.513512	-1.93996	0.00015	0.000413012	yes
Ndrg1	chr15:66929317-66969641	sgNEG-sort3	sgTP63-sort3	OK	39.6866	27.8096	-0.51307	-2.06267	5e-05	0.000143687	yes
Ankrd28	chr14:31700014-31830415	sgNEG-sort3	sgTP63-sort3	OK	6.6669	4.67282	-0.512724	-1.754	0.00055	0.00141977	yes
Lta4h	chr10:93453395-93484896	sgNEG-sort3	sgTP63-sort3	OK	43.1924	30.2987	-0.511525	-1.99378	0.0001	0.000280029	yes
Sorl1	chr9:41968488-42124289	sgNEG-sort3	sgTP63-sort3	OK	79.3447	55.6635	-0.511402	-1.79655	5e-05	0.000143687	yes
Stat4	chr1:51987147-52107189	sgNEG-sort3	sgTP63-sort3	OK	12.114	8.50143	-0.510893	-1.73353	0.00055	0.00141977	yes
Fbxl5	chr5:43744617-43782149	sgNEG-sort3	sgTP63-sort3	OK	82.8963	58.2138	-0.509946	-2.0239	5e-05	0.000143687	yes
Fam65b	chr13:24582188-24733806	sgNEG-sort3	sgTP63-sort3	OK	31.1902	21.9187	-0.508927	-1.91523	0.0001	0.000280029	yes
Uck2	chr1:167226083-167285127	sgNEG-sort3	sgTP63-sort3	OK	51.1042	35.9299	-0.508254	-1.93059	5e-05	0.000143687	yes
Kcnj2	chr11:111066163-111076825	sgNEG-sort3	sgTP63-sort3	OK	13.168	9.26512	-0.507152	-1.95823	5e-05	0.000143687	yes
Rasip1	chr7:45627536-45639092	sgNEG-sort3	sgTP63-sort3	OK	4.83528	3.40328	-0.506674	-1.38724	0.00525	0.0118102	yes
Arhgef18	chr8:3393007-3456600	sgNEG-sort3	sgTP63-sort3	OK	6.58874	4.64156	-0.505391	-1.74098	0.0004	0.00105048	yes
Itgb3	chr11:104607999-104670471	sgNEG-sort3	sgTP63-sort3	OK	3.26617	2.30203	-0.504694	-1.48887	0.0031	0.0072153	yes
Gab1	chr8:80764430-80880519	sgNEG-sort3	sgTP63-sort3	OK	23.2862	16.4248	-0.5036	-1.99168	5e-05	0.000143687	yes
Dennd3	chr15:73512559-73572242	sgNEG-sort3	sgTP63-sort3	OK	8.19938	5.78436	-0.503356	-1.79639	0.00055	0.00141977	yes
Arhgap26	chr18:38993144-39376285	sgNEG-sort3	sgTP63-sort3	OK	17.8759	12.613	-0.503098	-2.03051	5e-05	0.000143687	yes
Tuba4a	chr1:75210828-75219294	sgNEG-sort3	sgTP63-sort3	OK	41.3332	29.1782	-0.502409	-1.68694	0.0011	0.00272905	yes
Hspa2	chr12:76404175-76406936	sgNEG-sort3	sgTP63-sort3	OK	6.01046	4.24327	-0.502297	-1.38583	0.00535	0.0120219	yes
Svil	chr18:5046588-5119293	sgNEG-sort3	sgTP63-sort3	OK	28.4838	20.1517	-0.499238	-1.98362	5e-05	0.000143687	yes
Plcb1	chr2:134786163-135475258	sgNEG-sort3	sgTP63-sort3	OK	3.29921	2.33682	-0.497573	-1.56568	0.00175	0.00422355	yes
Sipa1l1	chr12:82170015-82451784	sgNEG-sort3	sgTP63-sort3	OK	13.5531	9.6023	-0.497173	-1.97301	5e-05	0.000143687	yes
Csf3r	chr4:126024658-126044975	sgNEG-sort3	sgTP63-sort3	OK	225.228	159.604	-0.496885	-1.52071	0.0018	0.00433591	yes
Klhl2	chr8:64739674-64849924	sgNEG-sort3	sgTP63-sort3	OK	21.3864	15.1649	-0.495959	-1.92081	0.0001	0.000280029	yes
Mmp9	chr2:164948218-164955849	sgNEG-sort3	sgTP63-sort3	OK	277.294	196.863	-0.494219	-1.45116	0.00315	0.007324	yes
Lmnb1	chr18:56707812-56753424	sgNEG-sort3	sgTP63-sort3	OK	124.659	88.5022	-0.494204	-1.86979	0.0001	0.000280029	yes
Gpcpd1	chr2:132529081-132578248	sgNEG-sort3	sgTP63-sort3	OK	75.4095	53.6028	-0.492436	-1.89291	0.0002	0.000543624	yes
Stx11	chr10:12939982-12964259	sgNEG-sort3	sgTP63-sort3	OK	19.9468	14.1843	-0.491866	-1.74274	0.00065	0.00166194	yes
Selp	chr1:164115263-164150026	sgNEG-sort3	sgTP63-sort3	OK	8.78276	6.24612	-0.491713	-1.63838	0.0008	0.00202265	yes
Gla	chrX:134588168-134601005	sgNEG-sort3	sgTP63-sort3	OK	46.7377	33.252	-0.491147	-1.97796	5e-05	0.000143687	yes
Mpzl1	chr1:165592180-165634541	sgNEG-sort3	sgTP63-sort3	OK	4.35501	3.09977	-0.490517	-1.17779	0.0198	0.0402315	yes
Rab27a	chr9:73044809-73097614	sgNEG-sort3	sgTP63-sort3	OK	19.0775	13.58	-0.490395	-1.84881	0.00025	0.000672292	yes
Dgka	chr10:128706257-128744056	sgNEG-sort3	sgTP63-sort3	OK	15.5927	11.1014	-0.490122	-1.76364	0.00055	0.00141977	yes
Mertk	chr2:128698996-128802188	sgNEG-sort3	sgTP63-sort3	OK	40.3073	28.7106	-0.48946	-1.95326	5e-05	0.000143687	yes
Hes1	chr16:30065356-30067796	sgNEG-sort3	sgTP63-sort3	OK	15.4012	10.9708	-0.489371	-1.47084	0.00335	0.00775772	yes
Slc16a1	chr3:104638663-104658462	sgNEG-sort3	sgTP63-sort3	OK	10.2625	7.31187	-0.489076	-1.79142	0.00025	0.000672292	yes
Lpin1	chr12:16535668-16589770	sgNEG-sort3	sgTP63-sort3	OK	5.551	3.95597	-0.488716	-1.59648	0.0014	0.0034235	yes
Chrm3	chr13:9876612-10360803	sgNEG-sort3	sgTP63-sort3	OK	3.31053	2.36614	-0.484531	-1.18899	0.018	0.0368748	yes
Rcsd1	chr1:165648944-165708094	sgNEG-sort3	sgTP63-sort3	OK	57.3352	41.0567	-0.481805	-1.9299	0.0001	0.000280029	yes
Slc4a11	chr2:130684107-130697519	sgNEG-sort3	sgTP63-sort3	OK	3.82078	2.73824	-0.48062	-1.23654	0.01155	0.0245335	yes
Abcd2	chr15:91145870-91191807	sgNEG-sort3	sgTP63-sort3	OK	5.09414	3.65324	-0.479661	-1.58114	0.002	0.00478849	yes
Siglecf	chr7:43351340-43359470	sgNEG-sort3	sgTP63-sort3	OK	21.0558	15.1093	-0.478776	-1.7323	0.0006	0.00154109	yes
Plaur	chr7:24462482-24475968	sgNEG-sort3	sgTP63-sort3	OK	319.168	229.132	-0.478136	-1.75982	0.00035	0.000925354	yes
Ankrd33b	chr15:31291478-31367759	sgNEG-sort3	sgTP63-sort3	OK	7.42904	5.33664	-0.477244	-1.2154	0.01315	0.0276373	yes
Hgsnat	chr8:25944458-25976744	sgNEG-sort3	sgTP63-sort3	OK	55.9266	40.1882	-0.476761	-1.89846	0.0002	0.000543624	yes
Gm5150	chr3:15948069-16006332	sgNEG-sort3	sgTP63-sort3	OK	64.9187	46.6834	-0.475726	-1.76106	0.0003	0.000799291	yes
Clec4e	chr6:123281788-123289871	sgNEG-sort3	sgTP63-sort3	OK	200.772	144.589	-0.473599	-1.70817	0.00045	0.00117468	yes
Ceacam2	chr7:25516041-25540004	sgNEG-sort3	sgTP63-sort3	OK	6.51644	4.7014	-0.470994	-1.49719	0.0029	0.00678158	yes
Hmmr	chr11:40701387-40733437	sgNEG-sort3	sgTP63-sort3	OK	2.37394	1.71299	-0.470764	-1.11899	0.02345	0.0469828	yes
Igfbp6	chr15:102144185-102149512	sgNEG-sort3	sgTP63-sort3	OK	32.9616	23.836	-0.467644	-1.63879	0.00115	0.00284441	yes
Fbxo31	chr8:121549442-121578806	sgNEG-sort3	sgTP63-sort3	OK	4.34459	3.14345	-0.466872	-1.38965	0.0041	0.00937972	yes
Lrrk2	chr15:91673223-91816124	sgNEG-sort3	sgTP63-sort3	OK	8.55346	6.18996	-0.466579	-1.78449	0.00025	0.000672292	yes
Ptp4a1	chr1:30940302-30949755	sgNEG-sort3	sgTP63-sort3	OK	18.1206	13.1259	-0.465216	-1.82467	0.00025	0.000672292	yes
Gstm1	chr3:108012249-108017973	sgNEG-sort3	sgTP63-sort3	OK	21.0823	15.2749	-0.464873	-1.47939	0.00325	0.00753932	yes
Perm1	chr4:156215926-156221307	sgNEG-sort3	sgTP63-sort3	OK	2.63244	1.90777	-0.464513	-1.13861	0.0213	0.0430108	yes
Pag1	chr3:9687481-9833679	sgNEG-sort3	sgTP63-sort3	OK	18.5483	13.4433	-0.464398	-1.86304	0.00015	0.000413012	yes
Jdp2	chr12:85599104-85639878	sgNEG-sort3	sgTP63-sort3	OK	182.74	132.458	-0.464258	-1.81377	0.0002	0.000543624	yes
Rufy4	chr1:74125540-74148230	sgNEG-sort3	sgTP63-sort3	OK	4.76582	3.45813	-0.462733	-1.16187	0.01705	0.0350867	yes
Aph1b	chr9:66775486-66795423	sgNEG-sort3	sgTP63-sort3	OK	3.35572	2.43541	-0.462457	-1.29626	0.0096	0.0206948	yes
Klf13	chr7:63886350-63938915	sgNEG-sort3	sgTP63-sort3	OK	45.9761	33.3687	-0.462386	-1.77781	0.0005	0.00129842	yes
Sell	chr1:164062075-164080785	sgNEG-sort3	sgTP63-sort3	OK	79.748	57.9261	-0.461235	-1.81215	0.0003	0.000799291	yes
Dhx40	chr11:86768848-86807660	sgNEG-sort3	sgTP63-sort3	OK	25.2305	18.3464	-0.459672	-1.82616	0.0002	0.000543624	yes
Irs2	chr8:10986963-11008430	sgNEG-sort3	sgTP63-sort3	OK	25.7016	18.6907	-0.459539	-1.82127	0.00055	0.00141977	yes
Cd44	chr2:102811141-102901665	sgNEG-sort3	sgTP63-sort3	OK	189.861	138.146	-0.458746	-1.47259	0.0041	0.00937972	yes
Adam8	chr7:139978931-139992562	sgNEG-sort3	sgTP63-sort3	OK	92.6612	67.5793	-0.455383	-1.76857	0.0003	0.000799291	yes
Ltb4r1	chr14:55765961-55768492	sgNEG-sort3	sgTP63-sort3	OK	43.6906	31.8681	-0.45521	-1.69848	0.00095	0.00237754	yes
Lonrf1	chr8:36216063-36249516	sgNEG-sort3	sgTP63-sort3	OK	7.74539	5.6559	-0.45358	-1.52924	0.00205	0.00490121	yes
Man2a1	chr17:64601648-64755110	sgNEG-sort3	sgTP63-sort3	OK	56.0744	40.9755	-0.452581	-1.70583	0.00085	0.00214082	yes
Per2	chr1:91415981-91459328	sgNEG-sort3	sgTP63-sort3	OK	3.06465	2.2469	-0.447789	-1.30885	0.00935	0.0202009	yes
Card10	chr15:78775135-78803042	sgNEG-sort3	sgTP63-sort3	OK	4.2252	3.09943	-0.447018	-1.34682	0.00675	0.0149287	yes
Mgst1	chr6:138140536-138156752	sgNEG-sort3	sgTP63-sort3	OK	79.1768	58.1494	-0.445314	-1.6883	0.00075	0.00190255	yes
Siglece	chr7:43651069-43660161	sgNEG-sort3	sgTP63-sort3	OK	52.9605	38.9008	-0.445119	-1.75491	0.0005	0.00129842	yes
Vps37b	chr5:124004640-124032260	sgNEG-sort3	sgTP63-sort3	OK	51.157	37.6587	-0.441948	-1.75353	0.0002	0.000543624	yes
Homer1	chr13:93304494-93405129	sgNEG-sort3	sgTP63-sort3	OK	11.4545	8.43752	-0.441026	-1.36166	0.0078	0.0170863	yes
Trp53inp1	chr4:11156440-11174377	sgNEG-sort3	sgTP63-sort3	OK	15.5223	11.4405	-0.440196	-1.71573	0.00065	0.00166194	yes
Ifitm6	chr7:141015811-141016892	sgNEG-sort3	sgTP63-sort3	OK	269.194	198.49	-0.439583	-1.72122	0.00075	0.00190255	yes
Pram1	chr17:33638055-33645706	sgNEG-sort3	sgTP63-sort3	OK	28.0429	20.6855	-0.439016	-1.64037	0.0011	0.00272905	yes
Hipk1	chr3:103739814-103791563	sgNEG-sort3	sgTP63-sort3	OK	60.3557	44.5577	-0.437816	-1.53136	0.0016	0.00388126	yes
Sox13	chr1:133382299-133424212	sgNEG-sort3	sgTP63-sort3	OK	3.92558	2.89983	-0.436936	-1.17891	0.0199	0.0404195	yes
Tspan13	chr12:36014554-36042478	sgNEG-sort3	sgTP63-sort3	OK	48.6142	35.9856	-0.43396	-1.72645	0.0005	0.00129842	yes
Trpm2	chr10:77907721-77969872	sgNEG-sort3	sgTP63-sort3	OK	12.8721	9.52839	-0.433944	-1.7222	0.00045	0.00117468	yes
Stk17b	chr1:53755511-53785215	sgNEG-sort3	sgTP63-sort3	OK	272.178	201.557	-0.433363	-1.39422	0.0058	0.0129602	yes
Map4k2	chr19:6341159-6355619	sgNEG-sort3	sgTP63-sort3	OK	20.9609	15.563	-0.429577	-1.67381	0.00055	0.00141977	yes
Fry	chr5:150259929-150497753	sgNEG-sort3	sgTP63-sort3	OK	4.08608	3.03444	-0.429291	-1.56725	0.00105	0.00261247	yes
Hip1r	chr5:123973627-124003215	sgNEG-sort3	sgTP63-sort3	OK	3.14098	2.33259	-0.429278	-1.14311	0.0213	0.0430108	yes
Rffl	chr11:82781108-82871210	sgNEG-sort3	sgTP63-sort3	OK	12.7154	9.44872	-0.428384	-1.17225	0.0187	0.0381783	yes
Hdac4	chr1:91928778-92180341	sgNEG-sort3	sgTP63-sort3	OK	6.95228	5.16797	-0.427888	-1.63186	0.00115	0.00284441	yes
Id3	chr4:136143821-136145392	sgNEG-sort3	sgTP63-sort3	OK	113.456	84.3422	-0.427812	-1.68889	0.0007	0.0017835	yes
Dusp16	chr6:134715467-134792628	sgNEG-sort3	sgTP63-sort3	OK	37.0018	27.5213	-0.427049	-1.69711	0.0005	0.00129842	yes
Chil1	chr1:134182403-134190031	sgNEG-sort3	sgTP63-sort3	OK	144.029	107.208	-0.425939	-1.67142	0.0008	0.00202265	yes
Acap1	chr11:69881566-69895539	sgNEG-sort3	sgTP63-sort3	OK	14.2129	10.581	-0.425719	-1.45326	0.00365	0.00841116	yes
Soat2	chr15:102150574-102163436	sgNEG-sort3	sgTP63-sort3	OK	17.9409	13.3617	-0.425154	-1.48765	0.00325	0.00753932	yes
Glipr2	chr4:43957701-43979118	sgNEG-sort3	sgTP63-sort3	OK	52.7566	39.3736	-0.42212	-1.68434	0.00095	0.00237754	yes
Ms4a4a	chr19:11375487-11392915	sgNEG-sort3	sgTP63-sort3	OK	289.048	215.962	-0.420526	-1.65743	0.0006	0.00154109	yes
Slc16a3	chr11:120948483-120959000	sgNEG-sort3	sgTP63-sort3	OK	117.994	88.2309	-0.419358	-1.61474	0.0011	0.00272905	yes
Csrnp2	chr15:100479569-100495239	sgNEG-sort3	sgTP63-sort3	OK	3.51137	2.62581	-0.419275	-1.16105	0.0222	0.0446776	yes
Il17ra	chr6:120463196-120483727	sgNEG-sort3	sgTP63-sort3	OK	63.3805	47.4215	-0.418498	-1.63844	0.00095	0.00237754	yes
Slc27a4	chr2:29802679-29817522	sgNEG-sort3	sgTP63-sort3	OK	18.0295	13.4907	-0.418399	-1.60269	0.0009	0.00225989	yes
Slc2a1	chr4:119108744-119137329	sgNEG-sort3	sgTP63-sort3	OK	53.6331	40.1373	-0.418181	-1.68708	0.0009	0.00225989	yes
Chka	chr19:3851772-3894369	sgNEG-sort3	sgTP63-sort3	OK	20.1208	15.0629	-0.417691	-1.55201	0.0014	0.0034235	yes
Fam63a	chr3:95282934-95307176	sgNEG-sort3	sgTP63-sort3	OK	21.971	16.4509	-0.417428	-1.5465	0.00205	0.00490121	yes
G6pdx	chrX:74393290-74453778	sgNEG-sort3	sgTP63-sort3	OK	60.9364	45.6464	-0.416803	-1.42226	0.00405	0.00927067	yes
Sema6b	chr17:56123084-56140343	sgNEG-sort3	sgTP63-sort3	OK	20.3639	15.2785	-0.414506	-1.62308	0.0012	0.00296109	yes
Impact	chr18:12972251-12992948	sgNEG-sort3	sgTP63-sort3	OK	25.3688	19.0515	-0.413157	-1.62506	0.00115	0.00284441	yes
Abtb2	chr2:103566309-103718423	sgNEG-sort3	sgTP63-sort3	OK	8.34441	6.2704	-0.412253	-1.46266	0.00355	0.00819547	yes
Tgfb3	chr12:86056742-86079041	sgNEG-sort3	sgTP63-sort3	OK	12.96	9.74479	-0.411357	-1.49914	0.00295	0.00688975	yes
Lbr	chr1:181815314-181842401	sgNEG-sort3	sgTP63-sort3	OK	40.3385	30.3846	-0.408817	-1.64334	0.00065	0.00166194	yes
Antxr2	chr5:97884687-98030962	sgNEG-sort3	sgTP63-sort3	OK	42.9783	32.3869	-0.408199	-1.64185	0.0009	0.00225989	yes
Fpr2	chr17:17887823-17893952	sgNEG-sort3	sgTP63-sort3	OK	49.394	37.2318	-0.407801	-1.52648	0.003	0.00700046	yes
Slc35a5	chr16:45139572-45158673	sgNEG-sort3	sgTP63-sort3	OK	13.5138	10.1867	-0.407741	-1.5452	0.00155	0.0037676	yes
Ksr1	chr11:79014800-79146354	sgNEG-sort3	sgTP63-sort3	OK	6.75243	5.09032	-0.407649	-1.3449	0.00595	0.013271	yes
Ddhd1	chr14:45593170-45658143	sgNEG-sort3	sgTP63-sort3	OK	11.7537	8.87011	-0.406094	-1.55303	0.00165	0.00399511	yes
Dirc2	chr16:35694902-35769356	sgNEG-sort3	sgTP63-sort3	OK	18.1922	13.729	-0.406091	-1.59738	0.00095	0.00237754	yes
Sh2d3c	chr2:32721054-32755007	sgNEG-sort3	sgTP63-sort3	OK	16.4767	12.4419	-0.405214	-1.48055	0.00255	0.00600965	yes
Ccnd3	chr17:47505050-47611492	sgNEG-sort3	sgTP63-sort3	OK	74.0371	55.9319	-0.404577	-1.5061	0.0032	0.00743179	yes
Ulk1	chr5:110784488-110810081	sgNEG-sort3	sgTP63-sort3	OK	16.9982	12.8556	-0.402976	-1.59571	0.0013	0.00319448	yes
Kif23	chr9:61917277-61946799	sgNEG-sort3	sgTP63-sort3	OK	8.15278	6.17238	-0.401465	-1.32627	0.0072	0.0158613	yes
Suco	chr1:161816111-161876661	sgNEG-sort3	sgTP63-sort3	OK	12.9518	9.81734	-0.399749	-1.57915	0.0013	0.00319448	yes
Adgre5	chr8:83715176-83741311	sgNEG-sort3	sgTP63-sort3	OK	314.124	238.137	-0.399542	-1.19468	0.0168	0.0346308	yes
Tet2	chr3:133463676-133544390	sgNEG-sort3	sgTP63-sort3	OK	19.8178	15.0365	-0.398328	-1.59227	0.00115	0.00284441	yes
Atg9a	chr1:75180860-75192010	sgNEG-sort3	sgTP63-sort3	OK	14.6042	11.0929	-0.39675	-1.49758	0.0027	0.00633862	yes
Ccpg1	chr9:72985503-73039699	sgNEG-sort3	sgTP63-sort3	OK	53.3095	40.5105	-0.396094	-1.54148	0.0015	0.00365194	yes
Cytip	chr2:58129138-58160122	sgNEG-sort3	sgTP63-sort3	OK	126.91	96.5668	-0.394202	-1.32286	0.0092	0.0198962	yes
Atrn	chr2:130906495-131030326	sgNEG-sort3	sgTP63-sort3	OK	8.69545	6.62346	-0.392676	-1.54621	0.00215	0.00512552	yes
Entpd1	chr19:40612365-40741602	sgNEG-sort3	sgTP63-sort3	OK	54.1884	41.3004	-0.391828	-1.5443	0.00165	0.00399511	yes
Pde8a	chr7:81213803-81333622	sgNEG-sort3	sgTP63-sort3	OK	15.4755	11.8101	-0.389974	-1.40859	0.0042	0.00958989	yes
Hilpda	chr6:29272487-29275449	sgNEG-sort3	sgTP63-sort3	OK	35.2672	26.9192	-0.389693	-1.29757	0.00995	0.0213791	yes
Klhl24	chr16:20097553-20127744	sgNEG-sort3	sgTP63-sort3	OK	17.5594	13.4195	-0.387913	-1.55945	0.0016	0.00388126	yes
Htra1	chr7:130936202-130985658	sgNEG-sort3	sgTP63-sort3	OK	12.1574	9.30049	-0.386453	-1.23291	0.0137	0.0286934	yes
Top2a	chr11:98992946-99024189	sgNEG-sort3	sgTP63-sort3	OK	16.868	12.9072	-0.38611	-1.48532	0.0033	0.00764944	yes
Cav1	chr6:17306334-17341328	sgNEG-sort3	sgTP63-sort3	OK	7.86329	6.02209	-0.38487	-1.16397	0.01905	0.0388424	yes
Hmox1	chr8:75093617-75100593	sgNEG-sort3	sgTP63-sort3	OK	199.323	152.655	-0.384835	-1.47406	0.003	0.00700046	yes
Rab11fip1	chr8:27138772-27174646	sgNEG-sort3	sgTP63-sort3	OK	26.9206	20.6288	-0.384048	-1.52747	0.00225	0.00534687	yes
Cblb	chr16:52031548-52208046	sgNEG-sort3	sgTP63-sort3	OK	9.41158	7.2252	-0.381399	-1.45814	0.00345	0.00797779	yes
Mocs1	chr17:49428363-49455430	sgNEG-sort3	sgTP63-sort3	OK	18.4198	14.1423	-0.381244	-1.40474	0.0046	0.0104404	yes
Cdadc1	chr14:59559387-59597959	sgNEG-sort3	sgTP63-sort3	OK	11.3636	8.72843	-0.38062	-1.20035	0.01695	0.0349076	yes
Serinc5	chr13:92611137-92711946	sgNEG-sort3	sgTP63-sort3	OK	11.1471	8.56744	-0.379734	-1.45403	0.00335	0.00775772	yes
Fam117b	chr1:59913005-59985348	sgNEG-sort3	sgTP63-sort3	OK	23.3528	17.9644	-0.378449	-1.52204	0.002	0.00478849	yes
Ceacam1	chr7:25461701-25477625	sgNEG-sort3	sgTP63-sort3	OK	6.49446	4.99625	-0.378365	-1.14543	0.02155	0.0434819	yes
Mcu	chr10:59446983-59616692	sgNEG-sort3	sgTP63-sort3	OK	6.37348	4.91033	-0.376263	-1.11345	0.02415	0.0482891	yes
Wee1	chr7:110122058-110143299	sgNEG-sort3	sgTP63-sort3	OK	6.09055	4.69256	-0.376196	-1.15077	0.019	0.0387468	yes
Hexim1	chr11:103116324-103119724	sgNEG-sort3	sgTP63-sort3	OK	53.4555	41.1961	-0.375829	-1.50449	0.00285	0.00667251	yes
Fbxo30	chr10:11281329-11297969	sgNEG-sort3	sgTP63-sort3	OK	7.50056	5.78392	-0.374949	-1.33073	0.00795	0.0173957	yes
Mki67	chr7:135689787-135716379	sgNEG-sort3	sgTP63-sort3	OK	16.0787	12.4176	-0.372757	-1.47116	0.0028	0.00656074	yes
Ncapd2	chr6:125168006-125191586	sgNEG-sort3	sgTP63-sort3	OK	6.78754	5.25056	-0.370417	-1.25423	0.01205	0.0255008	yes
Padi4	chr4:140745507-140774203	sgNEG-sort3	sgTP63-sort3	OK	9.08366	7.03099	-0.369545	-1.12507	0.02465	0.0492107	yes
Cdt1	chr8:122568014-122573130	sgNEG-sort3	sgTP63-sort3	OK	14.0704	10.8918	-0.36942	-1.24552	0.01185	0.0251149	yes
Mctp1	chr13:76384960-77031810	sgNEG-sort3	sgTP63-sort3	OK	7.07255	5.47631	-0.369026	-1.25533	0.0111	0.0236502	yes
Abca7	chr10:79997614-80015572	sgNEG-sort3	sgTP63-sort3	OK	23.8626	18.4791	-0.36886	-1.47855	0.003	0.00700046	yes
Tbc1d15	chr10:115197870-115251493	sgNEG-sort3	sgTP63-sort3	OK	26.776	20.7554	-0.367451	-1.47072	0.0032	0.00743179	yes
Plec	chr15:76170973-76231378	sgNEG-sort3	sgTP63-sort3	OK	18.5932	14.4201	-0.366698	-1.41504	0.0038	0.00873416	yes
Ap4b1	chr3:103809516-103822025	sgNEG-sort3	sgTP63-sort3	OK	10.8475	8.41286	-0.366689	-1.24399	0.0128	0.026958	yes
Emilin2	chr17:71252175-71310965	sgNEG-sort3	sgTP63-sort3	OK	170.854	132.549	-0.366241	-1.25249	0.0115	0.0244355	yes
Ssh2	chr11:77216424-77460219	sgNEG-sort3	sgTP63-sort3	OK	78.2157	60.6874	-0.366061	-1.20779	0.0145	0.0302397	yes
Tnfaip2	chr12:111442660-111455018	sgNEG-sort3	sgTP63-sort3	OK	110.761	85.9714	-0.365523	-1.33809	0.00695	0.015345	yes
Insr	chr8:3150921-3279617	sgNEG-sort3	sgTP63-sort3	OK	9.63153	7.47597	-0.365504	-1.45436	0.0035	0.00808598	yes
Dock5	chr14:67751927-67933572	sgNEG-sort3	sgTP63-sort3	OK	15.8699	12.3226	-0.364983	-1.45918	0.00315	0.007324	yes
Mxi1	chr19:53310505-53375810	sgNEG-sort3	sgTP63-sort3	OK	13.479	10.4831	-0.362651	-1.40504	0.0047	0.0106523	yes
Cyfip2	chr11:46193848-46312859	sgNEG-sort3	sgTP63-sort3	OK	18.6242	14.4883	-0.362297	-1.43166	0.00355	0.00819547	yes
Mefv	chr16:3707214-3718124	sgNEG-sort3	sgTP63-sort3	OK	44.9755	35.0241	-0.36079	-1.45232	0.00335	0.00775772	yes
Ckap4	chr10:84526304-84533888	sgNEG-sort3	sgTP63-sort3	OK	31.8258	24.7888	-0.360508	-1.4216	0.00425	0.00969673	yes
Cdk2ap2	chr19:4097350-4099017	sgNEG-sort3	sgTP63-sort3	OK	194.239	151.537	-0.358159	-1.44349	0.0029	0.00678158	yes
Kdm5b	chr1:134560177-134632878	sgNEG-sort3	sgTP63-sort3	OK	8.26399	6.4542	-0.356601	-1.34753	0.0067	0.0148286	yes
Syne2	chr12:75818317-76110928	sgNEG-sort3	sgTP63-sort3	OK	2.09267	1.63659	-0.354655	-1.29651	0.011	0.0234563	yes
Anxa11	chr14:25842154-25886804	sgNEG-sort3	sgTP63-sort3	OK	28.3868	22.2159	-0.353626	-1.37007	0.00595	0.013271	yes
Mmp25	chr17:23629457-23645269	sgNEG-sort3	sgTP63-sort3	OK	13.6234	10.664	-0.353341	-1.28408	0.00965	0.0207925	yes
Asprv1	chr6:86628173-86629704	sgNEG-sort3	sgTP63-sort3	OK	23.8108	18.6495	-0.352475	-1.18769	0.0147	0.0306239	yes
Igf2r	chr17:12682405-12769706	sgNEG-sort3	sgTP63-sort3	OK	7.64721	5.99014	-0.352343	-1.37734	0.00555	0.0124332	yes
Auh	chr13:52835109-52929677	sgNEG-sort3	sgTP63-sort3	OK	19.3444	15.156	-0.352022	-1.12416	0.02305	0.0462489	yes
Sirpb1b	chr3:15495753-15575065	sgNEG-sort3	sgTP63-sort3	OK	26.205	20.5348	-0.351771	-1.24062	0.01125	0.023942	yes
Trps1	chr15:50654758-50890041	sgNEG-sort3	sgTP63-sort3	OK	16.5598	12.9799	-0.351407	-1.40763	0.00455	0.0103353	yes
Atg2a	chr19:6241667-6262304	sgNEG-sort3	sgTP63-sort3	OK	18.499	14.5084	-0.35056	-1.40744	0.00425	0.00969673	yes
Cnr2	chr4:135895188-135920219	sgNEG-sort3	sgTP63-sort3	OK	9.68548	7.5965	-0.350488	-1.25647	0.0119	0.0252124	yes
Eepd1	chr9:25481596-25604110	sgNEG-sort3	sgTP63-sort3	OK	21.2313	16.659	-0.349892	-1.32545	0.0086	0.0187068	yes
Fam107b	chr2:3713457-3782134	sgNEG-sort3	sgTP63-sort3	OK	101.846	79.9173	-0.349811	-1.34305	0.0078	0.0170863	yes
Cd33	chr7:43527455-43533171	sgNEG-sort3	sgTP63-sort3	OK	86.3693	67.8285	-0.348626	-1.3717	0.0061	0.0135851	yes
Epb41	chr4:131923426-132075313	sgNEG-sort3	sgTP63-sort3	OK	24.494	19.2415	-0.348203	-1.40107	0.0047	0.0106523	yes
Vopp1	chr6:57752263-57825125	sgNEG-sort3	sgTP63-sort3	OK	21.3676	16.794	-0.347479	-1.33618	0.008	0.0174975	yes
Zyx	chr6:42349827-42373268	sgNEG-sort3	sgTP63-sort3	OK	190.385	149.779	-0.34608	-1.2412	0.01135	0.0241413	yes
Cenpa	chr5:30666885-30674837	sgNEG-sort3	sgTP63-sort3	OK	22.7862	17.9275	-0.345988	-1.15769	0.0207	0.0419046	yes
Aph1c	chr9:66814993-66834706	sgNEG-sort3	sgTP63-sort3	OK	8.22396	6.47403	-0.345169	-1.26375	0.01095	0.0233602	yes
Trim30b	chr7:104355397-104358646	sgNEG-sort3	sgTP63-sort3	OK	16.8604	13.2745	-0.344983	-1.25413	0.01285	0.0270543	yes
Mkl1	chr15:80977764-81190757	sgNEG-sort3	sgTP63-sort3	OK	39.0702	30.786	-0.343797	-1.31859	0.00825	0.0179969	yes
H2afx	chr9:44334714-44336073	sgNEG-sort3	sgTP63-sort3	OK	19.679	15.5112	-0.343345	-1.10276	0.02335	0.0467986	yes
Golim4	chr3:75876182-75956949	sgNEG-sort3	sgTP63-sort3	OK	12.4961	9.85044	-0.343218	-1.29643	0.00995	0.0213791	yes
Rara	chr11:98937695-98974942	sgNEG-sort3	sgTP63-sort3	OK	33.5128	26.4207	-0.343043	-1.3689	0.00655	0.0145209	yes
D230025D16Rik	chr8:105225187-105255153	sgNEG-sort3	sgTP63-sort3	OK	12.6732	9.99234	-0.342891	-1.17604	0.01815	0.0371509	yes
6430548M08Rik	chr8:120114151-120165307	sgNEG-sort3	sgTP63-sort3	OK	19.9641	15.7537	-0.34172	-1.24176	0.01235	0.0260779	yes
Pilrb2	chr5:137865828-137871758	sgNEG-sort3	sgTP63-sort3	OK	15.0309	11.8616	-0.341641	-1.11634	0.02285	0.045872	yes
Sirt1	chr10:63319004-63339035	sgNEG-sort3	sgTP63-sort3	OK	11.5272	9.10409	-0.34045	-1.25299	0.01275	0.0268625	yes
Sla	chr15:66670769-66850720	sgNEG-sort3	sgTP63-sort3	OK	104.067	82.2539	-0.339356	-1.28867	0.00915	0.0197965	yes
Fam43a	chr16:30599722-30602797	sgNEG-sort3	sgTP63-sort3	OK	8.83109	6.98748	-0.33782	-1.11439	0.0224	0.0450476	yes
Rassf3	chr10:121410350-121476250	sgNEG-sort3	sgTP63-sort3	OK	57.1841	45.2787	-0.336782	-1.34578	0.0064	0.0142109	yes
Kif2a	chr13:106960584-107022114	sgNEG-sort3	sgTP63-sort3	OK	10.2168	8.09038	-0.336662	-1.20204	0.01525	0.0316779	yes
Zfand2a	chr5:139471215-139484491	sgNEG-sort3	sgTP63-sort3	OK	37.1271	29.4014	-0.336589	-1.33934	0.0064	0.0142109	yes
Tob1	chr11:94211453-94215492	sgNEG-sort3	sgTP63-sort3	OK	44.1652	35.013	-0.335018	-1.33516	0.0067	0.0148286	yes
Dmxl2	chr9:54365157-54501626	sgNEG-sort3	sgTP63-sort3	OK	16.899	13.4082	-0.333826	-1.3314	0.00775	0.0169832	yes
Fpr1	chr17:17876470-17883939	sgNEG-sort3	sgTP63-sort3	OK	47.5868	37.763	-0.333589	-1.24815	0.0136	0.0284974	yes
Sertad1	chr7:27486952-27490314	sgNEG-sort3	sgTP63-sort3	OK	104.026	82.6286	-0.332236	-1.33026	0.00825	0.0179969	yes
Atrnl1	chr19:57611033-58133340	sgNEG-sort3	sgTP63-sort3	OK	17.4136	13.8323	-0.332172	-1.34056	0.0065	0.0144181	yes
Ldlrad3	chr2:101950200-102186460	sgNEG-sort3	sgTP63-sort3	OK	8.18051	6.49959	-0.331842	-1.14813	0.02175	0.0438456	yes
Sqrdl	chr2:122765358-122809551	sgNEG-sort3	sgTP63-sort3	OK	40.3053	32.0607	-0.330164	-1.27056	0.0105	0.0224688	yes
Fam129a	chr1:151571372-151719347	sgNEG-sort3	sgTP63-sort3	OK	46.6079	37.1106	-0.328741	-1.31453	0.00895	0.0193977	yes
Aqp1	chr6:55336298-55348555	sgNEG-sort3	sgTP63-sort3	OK	12.6082	10.0414	-0.328392	-1.11753	0.0215	0.0433937	yes
Gmfg	chr7:28437446-28446895	sgNEG-sort3	sgTP63-sort3	OK	87.9608	70.1352	-0.326723	-1.27893	0.0105	0.0224688	yes
Dedd2	chr7:25202839-25219859	sgNEG-sort3	sgTP63-sort3	OK	20.9531	16.7196	-0.325631	-1.15343	0.02155	0.0434819	yes
Vcl	chr14:20929432-21033673	sgNEG-sort3	sgTP63-sort3	OK	18.9991	15.1617	-0.325495	-1.29349	0.00975	0.0209912	yes
Trp53bp2	chr1:182409166-182462436	sgNEG-sort3	sgTP63-sort3	OK	11.4333	9.13675	-0.323486	-1.21587	0.0121	0.0255987	yes
Dhx38	chr8:109548023-109565601	sgNEG-sort3	sgTP63-sort3	OK	37.964	30.3461	-0.32312	-1.30339	0.00935	0.0202009	yes
Cd300lf	chr11:115091430-115162240	sgNEG-sort3	sgTP63-sort3	OK	108.337	86.603	-0.32304	-1.25975	0.01105	0.0235556	yes
Tmem43	chr6:91473750-91488458	sgNEG-sort3	sgTP63-sort3	OK	30.0134	24.0054	-0.322249	-1.27818	0.00985	0.021189	yes
Nfil3	chr13:52967208-52981039	sgNEG-sort3	sgTP63-sort3	OK	191.622	153.294	-0.321959	-1.22009	0.01425	0.0297636	yes
Nedd9	chr13:41309915-41487360	sgNEG-sort3	sgTP63-sort3	OK	24.1765	19.3424	-0.321837	-1.27954	0.01135	0.0241413	yes
Lonrf3	chrX:36328408-36366856	sgNEG-sort3	sgTP63-sort3	OK	6.33957	5.07413	-0.321226	-1.18634	0.0167	0.0344472	yes
Cpeb2	chr5:43233462-43289724	sgNEG-sort3	sgTP63-sort3	OK	28.6101	22.9017	-0.321074	-1.26565	0.0114	0.0242435	yes
Sde2	chr1:180851150-180868114	sgNEG-sort3	sgTP63-sort3	OK	37.5831	30.0846	-0.321059	-1.29649	0.00855	0.018604	yes
Hectd1	chr12:51743721-51829536	sgNEG-sort3	sgTP63-sort3	OK	33.828	27.0967	-0.320102	-1.22763	0.0136	0.0284974	yes
Mlxip	chr5:123394797-123457931	sgNEG-sort3	sgTP63-sort3	OK	30.6582	24.5655	-0.319637	-1.24262	0.01145	0.0243375	yes
Usp32	chr11:84984487-85139955	sgNEG-sort3	sgTP63-sort3	OK	13.253	10.6253	-0.318815	-1.26954	0.0092	0.0198962	yes
Deptor	chr15:55112316-55259273	sgNEG-sort3	sgTP63-sort3	OK	6.38964	5.12774	-0.317412	-1.20784	0.0141	0.0294723	yes
Klf3	chr5:64803522-64830129	sgNEG-sort3	sgTP63-sort3	OK	75.2201	60.3875	-0.316868	-1.27147	0.01075	0.0229641	yes
Mfsd6	chr1:52656304-52727318	sgNEG-sort3	sgTP63-sort3	OK	16.0855	12.917	-0.316487	-1.22746	0.01385	0.0289883	yes
Rnf169	chr7:99920253-99980458	sgNEG-sort3	sgTP63-sort3	OK	16.6356	13.374	-0.314846	-1.25491	0.011	0.0234563	yes
Gzf1	chr2:148681119-148692949	sgNEG-sort3	sgTP63-sort3	OK	9.81118	7.88964	-0.314468	-1.14343	0.0216	0.0435746	yes
Pdxk	chr10:78436746-78464948	sgNEG-sort3	sgTP63-sort3	OK	39.4645	31.7983	-0.311605	-1.23846	0.01415	0.0295711	yes
Tlr5	chr1:182954787-182976044	sgNEG-sort3	sgTP63-sort3	OK	19.6407	15.8405	-0.310225	-1.18027	0.0168	0.0346308	yes
Pik3r1	chr13:101680760-101768217	sgNEG-sort3	sgTP63-sort3	OK	25.8908	20.8815	-0.31021	-1.24724	0.0116	0.0246251	yes
Itga4	chr2:79255425-79428988	sgNEG-sort3	sgTP63-sort3	OK	45.3909	36.6257	-0.309549	-1.12604	0.0236	0.0472595	yes
Sepn1	chr4:134537891-134552166	sgNEG-sort3	sgTP63-sort3	OK	59.8442	48.301	-0.309159	-1.21822	0.01365	0.0285958	yes
Csgalnact2	chr6:118107451-118139140	sgNEG-sort3	sgTP63-sort3	OK	26.2274	21.1851	-0.308022	-1.22992	0.01295	0.0272481	yes
Vegfa	chr17:46016992-46032377	sgNEG-sort3	sgTP63-sort3	OK	72.4667	58.5353	-0.30801	-1.20283	0.0175	0.0359334	yes
Atp1a3	chr7:24978168-25005937	sgNEG-sort3	sgTP63-sort3	OK	44.0532	35.5952	-0.307567	-1.22991	0.0137	0.0286934	yes
Actn1	chr12:80167541-80260371	sgNEG-sort3	sgTP63-sort3	OK	35.9298	29.0401	-0.307135	-1.22319	0.01325	0.0278336	yes
Bcr	chr10:75060895-75184923	sgNEG-sort3	sgTP63-sort3	OK	7.24501	5.86355	-0.305212	-1.14337	0.0227	0.0455902	yes
Cwc25	chr11:97745469-97766613	sgNEG-sort3	sgTP63-sort3	OK	22.655	18.3691	-0.302546	-1.18783	0.01815	0.0371509	yes
R3hdm4	chr10:79910052-79916930	sgNEG-sort3	sgTP63-sort3	OK	56.9641	46.1944	-0.302334	-1.20025	0.0158	0.0327411	yes
G0s2	chr1:193272159-193273188	sgNEG-sort3	sgTP63-sort3	OK	253.888	206.04	-0.30127	-1.1595	0.01975	0.0401407	yes
Tppp3	chr8:105467491-105471422	sgNEG-sort3	sgTP63-sort3	OK	65.6924	53.3359	-0.300619	-1.14626	0.0222	0.0446776	yes
Ell	chr8:70539674-70592858	sgNEG-sort3	sgTP63-sort3	OK	19.6915	16.0049	-0.299053	-1.1485	0.02315	0.0464384	yes
Pten	chr19:32757576-32826160	sgNEG-sort3	sgTP63-sort3	OK	26.4164	21.4731	-0.298905	-1.18915	0.0174	0.0357397	yes
Crebrf	chr17:26715649-26776626	sgNEG-sort3	sgTP63-sort3	OK	13.2628	10.7911	-0.29755	-1.1844	0.01675	0.0345418	yes
Hcar2	chr5:123863569-123865516	sgNEG-sort3	sgTP63-sort3	OK	72.3412	58.8759	-0.297139	-1.16579	0.0167	0.0344472	yes
Mafk	chr5:139791535-139802652	sgNEG-sort3	sgTP63-sort3	OK	61.2514	49.9307	-0.294816	-1.18604	0.01695	0.0349076	yes
Ncf2	chr1:152800152-152836990	sgNEG-sort3	sgTP63-sort3	OK	93.4146	76.2557	-0.292803	-1.11796	0.02495	0.0497622	yes
Arrdc3	chr13:80883421-80896043	sgNEG-sort3	sgTP63-sort3	OK	23.0051	18.809	-0.29053	-1.14426	0.0213	0.0430108	yes
Ahr	chr12:35497978-35534989	sgNEG-sort3	sgTP63-sort3	OK	17.6285	14.4439	-0.287448	-1.15373	0.0197	0.040051	yes
Sun2	chr15:79724067-79742536	sgNEG-sort3	sgTP63-sort3	OK	60.383	49.5122	-0.28636	-1.11263	0.0248	0.0494814	yes
Xpr1	chr1:155275656-155417444	sgNEG-sort3	sgTP63-sort3	OK	21.0385	17.2532	-0.286166	-1.14994	0.01995	0.0405101	yes
Sipa1l3	chr7:29320377-29505460	sgNEG-sort3	sgTP63-sort3	OK	10.4134	8.55291	-0.283958	-1.12702	0.02335	0.0467986	yes

## Sheet: ranked cancer sgNEG vs sgTP63
gene	log2(fold_change)
C20orf141	5.8729
NFE4	5.63355
LXN	5.57749
RTL1	4.83186
PAEP	4.80836
PRSS33	4.80116
SERPINA5	4.35815
DIO2	4.24641
IFI44L	4.02014
PAPPA	3.90834
OR10H1	3.85432
LOC100129216	3.85136
PMP22	3.83414
SERPINA3	3.81127
FAM81B	3.78715
NNMT	3.6815
RSAD2	3.60594
C9orf24	3.55724
SLC16A7	3.4508
CHI3L2	3.43743
SERPINB4	3.36495
MIA	3.27986
NID2	3.24758
LAPTM5	3.23583
CMPK2	3.22208
RIIAD1	3.19327
DPP4	3.16763
CLDN6	3.16637
CHRNA9	3.14919
LIPK	3.1342
S100A12	3.12405
CAPSL	3.10596
CITED1	3.06529
NTSR1	2.99245
AIM2	2.96525
IFI6	2.90881
TFF2	2.89697
C20orf85	2.8921
NFE2	2.86266
CFAP77	2.84745
SPINK4	2.82164
KRT6B	2.73646
FAM92B	2.73322
BIRC7	2.73207
C11orf96	2.73058
DRC7	2.72133
PRSS3	2.70542
MAL	2.68962
ARMC3	2.67568
ACE	2.62418
DHRS2	2.62337
PRLR	2.56707
SCG2	2.53664
RNF182	2.52129
PLAC8	2.50277
SPANXC	2.49867
EREG	2.49646
FPR1	2.48964
IL7R	2.47882
COL6A2	2.47546
DRC1	2.46668
C5orf49	2.45505
MAF	2.45254
TEKT1	2.44959
ADORA1	2.43179
C1orf194	2.42676
ZBBX	2.41154
CYP26A1	2.39578
COL6A1	2.38403
VWA3A	2.36672
DIO3	2.36474
CFAP126	2.36047
SLC45A1	2.33966
SLCO2A1	2.33114
IFIT1	2.31399
L1CAM	2.3116
TESC	2.29878
CFAP45	2.29369
TMEM158	2.29296
BHLHE41	2.2822
LCK	2.26636
SERPINE2	2.26187
IL11	2.26113
C11orf91	2.24382
GFY	2.22853
INSL4	2.21926
CRYGN	2.20646
ALPPL2	2.20206
PRLH	2.20049
ZMYND10	2.19124
PIFO	2.17714
VIM	2.152
DNAI1	2.13215
LIPG	2.11758
CCL26	2.11332
EFHB	2.11079
LHB	2.10325
DNER	2.10211
ALPP	2.09857
OAS2	2.08065
LRRC71	2.07558
CHI3L1	2.06449
S100A8	2.05468
ZNF365	2.05246
IFITM1	2.03658
LRRC10B	2.00983
NPAS2	1.98744
IL6	1.97922
TTLL9	1.97071
CASC1	1.95918
WDR38	1.95006
CALB2	1.92549
F2R	1.91267
ERVH48-1	1.8999
IFI44	1.89202
ADAMTS15	1.8882
ELFN2	1.87899
S100A7	1.87621
WISP2	1.87137
MAPK8IP2	1.86781
GAST	1.86538
CHST11	1.86496
CFAP73	1.86427
SLC6A17	1.85671
NMNAT2	1.84673
RRAD	1.84333
FANK1	1.84316
INHBA	1.84267
G0S2	1.83693
EFCAB12	1.83424
CDHR4	1.83411
KRTAP21-2	1.82147
HYDIN	1.81459
FN1	1.80932
GPRC5A	1.79234
FSCN2	1.79233
GJB2	1.78989
XAF1	1.78654
CATSPER1	1.78445
CALHM3	1.78215
SERPINB3	1.77744
RGS9	1.77254
MORN5	1.76828
OTUD1	1.7616
TEKT2	1.7568
PKD1L2	1.75605
LRRC74B	1.74332
MPP1	1.73167
C2orf50	1.72455
SPON2	1.71836
BEAN1	1.71836
ASPHD1	1.71694
RSPH4A	1.71171
CFAP157	1.69979
SMIM5	1.69597
HRASLS2	1.68632
ANKRD10	1.67235
OAS1	1.66615
SLC6A20	1.66082
FHAD1	1.65904
IGF2	1.65901
C10orf107	1.65424
SEMA3B	1.64978
ISG15	1.649
FAM25A	1.64569
KLK1	1.64395
TCN1	1.64117
PDE5A	1.63851
STRIP2	1.63841
DPPA2	1.6378
KCNMA1	1.6366
NCCRP1	1.63277
TMEM176A	1.63064
CD3D	1.62288
NECAB2	1.61596
BATF2	1.60505
SPEF1	1.60408
TNC	1.60382
SYBU	1.60375
DKK1	1.59972
C9orf135	1.59674
TH	1.59408
PPIL6	1.59189
CD14	1.57082
FBXO2	1.56947
MYPN	1.56833
SYT13	1.56729
KRT81	1.5669
MEIS3	1.56346
ROPN1L	1.56182
ZNF114	1.559
PPM1N	1.54873
RAB32	1.54728
CPZ	1.53498
RASSF8	1.52399
GDPD1	1.51526
GEM	1.51404
CHGB	1.50892
PRKG2	1.50879
STMN3	1.49321
ARHGAP29	1.48825
DNAH7	1.4848
FAM178B	1.48443
SPAG8	1.47989
KLK7	1.45708
HLA-DQA1	1.45588
ATP6V0A4	1.45475
PDE4A	1.44516
NOS3	1.43986
IFIT3	1.43375
HSH2D	1.43219
FMNL1	1.42478
TYMP	1.42386
DYSF	1.42147
ROS1	1.41714
FAM198A	1.41705
MGAT5B	1.4132
C11orf70	1.41074
SH2D2A	1.41046
FXYD1	1.40973
FOXJ1	1.40779
CDH12	1.40741
PTPRR	1.40542
DLG4	1.40022
DIRAS3	1.39792
GAL	1.39704
C5orf58	1.39678
HCST	1.39315
WFDC3	1.38949
HTR1D	1.3856
ALDH1A2	1.383
CCDC65	1.38223
CCDC40	1.37964
CCL24	1.37831
GPRC5D	1.37622
LAT2	1.37471
APOE	1.37251
KLK8	1.37139
PTPRE	1.3682
TMEM86A	1.36486
CFAP52	1.36453
BTBD16	1.35938
SRPX	1.35822
NES	1.35394
CDA	1.35079
FLVCR2	1.35008
PROM1	1.34922
PSG5	1.34587
SLC39A8	1.34557
FSD1L	1.34514
MILR1	1.33907
PRR29	1.33555
RIBC1	1.33507
CFAP43	1.33302
PYGB	1.33236
DDX60L	1.33021
TIMP2	1.32761
TREM1	1.32217
DNAAF3	1.32119
CARD17	1.32096
DENND5B	1.31407
LIF	1.31352
NT5E	1.31246
CKM	1.31234
IGFBP5	1.30942
IQCD	1.30144
DCDC2B	1.30127
RUNDC3A	1.30078
SECTM1	1.29679
RTKN2	1.29506
SEC14L6	1.28965
KLK6	1.28786
CCDC114	1.28763
IFNE	1.28126
SYTL5	1.28028
ABCC3	1.27987
PLAUR	1.27763
OSBP2	1.27513
DAB2	1.27394
GFPT2	1.27286
ACKR2	1.27283
PLEKHB1	1.27281
HTRA3	1.2685
CLCF1	1.26677
RHOF	1.26541
OASL	1.26511
AOC1	1.26333
LOC105372824	1.26329
ADGRE2	1.25748
TUBB2B	1.25505
TIAM2	1.2546
LOXL2	1.25418
LEMD1	1.25211
PLTP	1.25144
COL5A2	1.24897
IL17RE	1.24692
C3	1.23912
DCBLD2	1.23744
TUBB3	1.23051
GGT1	1.22534
USP18	1.22289
CCDC71L	1.22176
GDPD5	1.22092
UBASH3B	1.22023
C1orf189	1.21586
TMEM176B	1.21496
IFIH1	1.21479
TBC1D9	1.21464
OPTN	1.21172
HHEX	1.20517
SULT1A2	1.20394
ADRA1B	1.20309
DNTTIP1	1.20251
RAB31	1.19839
C7orf57	1.19822
CD164L2	1.19664
KRT10	1.19657
LGALS1	1.19391
S100A9	1.19051
HPCAL1	1.18874
C2CD4D	1.18807
FZD8	1.18652
KRT16	1.1819
ZAK	1.18069
PMEPA1	1.17877
ZFP42	1.17716
TLR6	1.17344
HIST1H4B	1.17124
TNNT1	1.1707
CITED2	1.16893
ANXA9	1.16469
TNFRSF18	1.16124
RTP3	1.16071
INHA	1.15682
TTC25	1.15566
CST6	1.15476
LYPD2	1.15095
HRK	1.14844
ATG9B	1.14684
TMEM61	1.14611
RARRES3	1.14514
ATP11A	1.14398
CACNA1D	1.14394
PDZD7	1.14193
GPAT3	1.14089
LRRC46	1.13989
CTXN1	1.13982
SAMD9L	1.13861
KRAS	1.1373
SSPN	1.13679
C1orf61	1.13511
TMEM140	1.13484
FAM109A	1.13045
KIAA1462	1.12727
INPP5J	1.12548
LIMS2	1.12503
DNAAF1	1.12338
RGS11	1.1233
CHN1	1.12193
SERPING1	1.12126
SGK1	1.11481
LRRC43	1.11454
PFKP	1.11366
SLCO4A1	1.11355
ERGIC2	1.10696
PPM1K	1.10641
CD55	1.10625
RSPH1	1.1059
PAPSS2	1.10458
SULT4A1	1.10401
CD74	1.10379
C15orf48	1.10222
PPARG	1.09979
AKAP12	1.09791
KISS1	1.09767
OAS3	1.09592
C6orf141	1.0936
CDCP1	1.09334
TNS3	1.08724
LETM2	1.08054
SLC16A3	1.07949
SLC15A3	1.07849
SLC30A2	1.07715
CPE	1.07665
ITPR3	1.07589
FYB	1.07447
BCAR3	1.07437
PRTFDC1	1.07401
SELM	1.07038
PTPRM	1.06952
TRIML2	1.06859
DCBLD1	1.06536
AZIN2	1.06478
PRRX2	1.06407
GBP2	1.06371
KLK5	1.06329
GPR173	1.06163
FLNC	1.06003
RPS6KA2	1.05902
C1QTNF1	1.05887
IFITM2	1.05665
CALHM2	1.05411
RORC	1.05081
TMEM45A	1.04915
MDH1B	1.04911
LRRC6	1.04784
ERRFI1	1.0474
CMTM7	1.04727
CD70	1.04724
IRF9	1.0471
MELTF	1.04521
KCNC3	1.04485
ITGB7	1.04393
NME1-NME2	1.04385
HAGHL	1.04281
NGEF	1.04061
ATP5J2-PTCD1	1.03749
ETV7	1.03702
SPEF2	1.03512
GBP4	1.03501
CSGALNACT1	1.03428
SPATA17	1.03294
ZNF165	1.03167
CLIP2	1.03132
RAB36	1.0306
ADGRE5	1.03025
ITGBL1	1.0298
RAB6B	1.02977
TMPRSS3	1.02583
LRRC73	1.02074
TNFRSF19	1.02062
PRSS22	1.01825
KCNK15	1.01758
FSCN1	1.01745
RASGEF1A	1.01659
AVPI1	1.01599
DDX60	1.01532
EEF1A2	1.01439
S100A13	1.01408
RGS14	1.01237
SYNGR3	1.00889
KLF6	1.00869
DNAH5	1.0057
MATK	1.00244
CFAP70	0.999682
FCRLB	0.996774
ARL14	0.995236
DHX32	0.994396
C4orf48	0.992475
EIF3C	0.992359
ODF3B	0.992143
SEC14L4	0.989885
IFITM3	0.989445
PRKCDBP	0.986771
ZMYND8	0.98465
GOLGA7B	0.982631
PARP9	0.981749
FRMD5	0.981008
PHLDA1	0.97927
SLCO5A1	0.979245
F2RL1	0.978689
EPS8	0.978595
TIMP1	0.978426
C1orf228	0.97682
MMP7	0.976115
EPSTI1	0.975727
THEM5	0.975106
CATIP	0.97497
SPHK1	0.973541
ASUN	0.970928
BDNF	0.970762
IFIT2	0.970614
S100A5	0.970572
SOD2	0.970152
SDCBP2	0.964957
CCDC153	0.96412
SNX21	0.963876
UNC13D	0.962518
CCRL2	0.962512
SLC2A3	0.961515
NGF	0.957917
DDX58	0.956433
STAC	0.956422
STAM	0.956403
C2orf70	0.955622
DPYD	0.952226
CYSRT1	0.951626
HKDC1	0.951367
C14orf132	0.949811
ELL2	0.949735
ABTB2	0.948026
OSBPL10	0.946166
TEX9	0.944945
TNIK	0.94159
RPGR	0.93778
TRPV3	0.93751
WWTR1	0.93716
FAR2	0.934784
HIST1H4I	0.934732
TCF7	0.934088
SLC35G2	0.933662
S100P	0.930129
CLIP4	0.92649
RTP4	0.923579
HELZ2	0.921637
PHYHIP	0.920332
BBOF1	0.919964
LRRC27	0.9165
PDE8B	0.91641
LCP1	0.913326
ABHD14A-ACY1	0.910537
ABLIM3	0.908965
PCSK5	0.908172
SERPINB9	0.908003
RASD2	0.907901
ITGB6	0.906894
MAPK8IP1	0.905743
ING1	0.905719
IGFBP6	0.905551
EPHA10	0.905157
SYT12	0.904113
FGFR1OP2	0.90341
TLDC2	0.902627
TSNAXIP1	0.901768
SDC3	0.901498
KYNU	0.901276
PROCR	0.90078
STX2	0.899426
ZBED2	0.898764
HMOX1	0.897767
SPTSSA	0.896166
DYNLT3	0.895977
HIST1H2AI	0.895925
C20orf195	0.895572
TNFSF9	0.893932
ITGB2	0.893423
APOL2	0.892778
HHIPL1	0.892258
DUSP4	0.891795
CDC42EP1	0.891444
SSFA2	0.891418
PRSS23	0.889001
IFI35	0.888587
SOX9	0.887879
SPP1	0.887864
ARHGAP21	0.88723
GRAMD2	0.884535
DNAH6	0.884333
CXCL2	0.884036
KIF9	0.884034
SLC52A3	0.882816
EDEM1	0.881818
FHL2	0.88061
CCDC187	0.880315
CARD16	0.87825
MGP	0.87791
TMEM55A	0.875538
AZGP1	0.873228
SNPH	0.870762
STXBP5	0.870421
PPP2R2C	0.870352
DMPK	0.869385
RNLS	0.86931
SPATA6	0.868696
PARP12	0.868586
GATA3	0.861416
TRNP1	0.861053
ADAM8	0.860464
HERC5	0.859506
TTLL3	0.858326
DAPK1	0.857615
RAB3IL1	0.856296
KIAA0319	0.856259
SLC7A2	0.854603
ITGA3	0.853409
MITF	0.85247
VSIG10L	0.851253
PLA2G16	0.848335
PLIN3	0.847825
SDSL	0.845817
RASA3	0.845348
LYRM5	0.845144
THEMIS2	0.845062
EMP3	0.844907
PYROXD1	0.843632
RAB20	0.84247
SLC9A7	0.840962
SPIRE2	0.839805
HRH1	0.839687
FHL3	0.838778
WBP2	0.835932
HMGA2	0.835843
ICAM1	0.83342
C5AR1	0.833338
PCDH1	0.831935
CTSA	0.82972
PLK3	0.829577
VAT1	0.829117
ASTN2	0.82869
ITGA5	0.827391
CD59	0.827236
DOCK3	0.826014
UBALD2	0.825275
ABCC2	0.825252
SMIM1	0.823521
CD44	0.822316
PPP1R32	0.821592
TRIB1	0.81821
RPS27L	0.817582
A1BG	0.816697
NLRC5	0.814766
SLC34A3	0.814481
ARC	0.813017
MMP9	0.811545
SYNPO	0.811497
PROSER2	0.810426
MNS1	0.809329
PI4K2A	0.806463
MAGI1	0.806342
AK8	0.806167
HIST1H1C	0.800407
DHX58	0.796669
NCOA7	0.795565
CCDC74B	0.795241
ELOVL4	0.794896
TSPAN10	0.794769
ARMC2	0.794642
GJB6	0.793926
CEACAM1	0.79347
MMD	0.79327
LUZP2	0.792281
FAM71F1	0.791776
SPRN	0.791275
IFIT5	0.790865
LMO1	0.790597
LRFN3	0.789835
TMEM67	0.789812
OSMR	0.786724
KIAA0754	0.784745
STAT1	0.784617
KCNT1	0.784131
RGS10	0.783628
TCF7L2	0.783362
HIST1H2BC	0.782992
CASP1	0.781846
RIBC2	0.780551
CTSL	0.77957
ACOT7	0.778617
TCTEX1D4	0.777764
FKBP10	0.776387
RPUSD3	0.775782
TMOD1	0.774658
WFDC10B	0.774481
KCNK1	0.77387
ZDHHC14	0.773573
FAM47E-STBD1	0.773178
UBXN10	0.77282
FBXO6	0.772462
CCDC189	0.772316
CCDC91	0.772185
SLC25A35	0.77181
CAPN8	0.771204
BDKRB2	0.770979
CD4	0.770423
ARNTL2	0.767687
VWA1	0.767077
GATA2	0.766983
SPDYC	0.766958
TRIM17	0.766928
PALD1	0.766707
ST3GAL4	0.766629
PAM16	0.766479
DCLK1	0.766384
HOPX	0.76513
FUOM	0.763814
ZDHHC24	0.763422
ZC3H12C	0.762986
OSCP1	0.762732
CCDC103	0.762177
B3GNT7	0.761393
DCP1B	0.760962
HACD1	0.760453
CIB2	0.759874
IL15RA	0.758845
MFSD12	0.758504
MAK	0.757968
LRIF1	0.756399
IL2RG	0.755725
CDK20	0.754766
CAPS	0.754611
PCDHGC3	0.754247
FBP1	0.754058
LYPD5	0.753397
IL36RN	0.752711
AGTRAP	0.752547
TSHZ2	0.750477
RASD1	0.749918
PITPNM2	0.749601
ESAM	0.749217
STC1	0.748942
FIBCD1	0.747115
ARSI	0.746419
GSDMC	0.744442
PHOSPHO2-KLHL23	0.744094
HIST1H3D	0.742203
EFHC1	0.74145
FBXL2	0.738254
HSD17B3	0.737752
HOXC10	0.737356
REEP3	0.737344
SPSB1	0.736898
CCDC157	0.734681
DUSP5	0.734647
S100A3	0.734615
HIST1H4H	0.734165
RPP38	0.733965
AGPAT4	0.73355
PLEKHA4	0.73315
FNDC4	0.732711
TMEM231	0.731314
FAM102A	0.730892
LOC102724428	0.730598
SEMA3A	0.730302
HERC6	0.730143
KLHL42	0.728777
PDK4	0.726301
GAS2L1	0.725697
LOC100130705	0.725154
TPPP3	0.724381
SAMHD1	0.722347
LOC102724023	0.722207
BAIAP3	0.721937
GTPBP4	0.720965
MYO18A	0.720948
FOSL1	0.720318
ZNF33A	0.719282
CYSTM1	0.71926
IRX3	0.718507
NT5M	0.718251
TM4SF19	0.717928
PTPRH	0.717063
HOMER2	0.716746
C11orf63	0.716593
PRKAR2B	0.715943
ARL6IP5	0.715439
SLC29A4	0.715224
MTAP	0.713328
ACSL5	0.713048
RBKS	0.71241
PAQR5	0.712153
LOC400927-CSNK1E	0.711664
DYX1C1	0.711062
MAP3K8	0.710062
LOC107985532	0.706299
GSTO1	0.706169
RTN4	0.70504
SPA17	0.704709
CD163L1	0.704186
PPP3CA	0.703906
CTSV	0.703362
TMEM88B	0.703255
NTN4	0.700694
GDI2	0.700376
SQSTM1	0.700167
GPR153	0.699487
SFXN3	0.699282
FAM227A	0.698719
PIP4K2A	0.698262
ZC2HC1A	0.698223
HIST3H2BB	0.696892
AQP1	0.696401
MED21	0.695351
ACP7	0.695131
DAPK2	0.693586
UROS	0.692138
LRRC23	0.690081
CAMLG	0.690025
GRK5	0.68966
RFK	0.687524
SH3TC2	0.685627
TP53INP1	0.684234
ZDHHC11	0.684108
PITRM1	0.684074
ABCB9	0.683129
COBL	0.68263
KCNC4	0.682149
RNF224	0.681558
TTC23L	0.681285
NYAP1	0.680963
CD68	0.680703
PIK3AP1	0.680312
MARCKSL1	0.680213
C10orf95	0.68007
LACTB	0.67888
SPAG1	0.678735
EGR2	0.677942
FAM189A2	0.67782
CEP128	0.677655
CAMK2N1	0.677012
ARF4	0.676374
HIF1A	0.675903
PNMT	0.674642
RAB11FIP4	0.674252
NUDT5	0.674249
PNMA1	0.674214
KCP	0.673873
DUSP18	0.672901
ARHGAP12	0.67246
ANKRD42	0.672278
CMTM3	0.671789
CCDC113	0.671491
WDR78	0.670544
ARL8B	0.667598
KCNN4	0.666869
TEX2	0.665315
PDP1	0.665244
N4BP3	0.66343
ASB16	0.662762
UGT3A2	0.661649
HERC4	0.661574
AMIGO2	0.661119
EFNA5	0.660681
C3orf18	0.660458
TMEM17	0.659885
CBLB	0.659839
OSBPL5	0.659614
MME	0.657995
FAM46A	0.657096
PODXL	0.656645
SEPP1	0.656612
HLA-C	0.656561
CASP4	0.656414
MRPS35	0.656248
CD58	0.655698
GLRX	0.655668
PPP1R1C	0.655572
SPATA33	0.655372
C15orf52	0.654694
PML	0.654693
VAMP5	0.653773
PTRF	0.652798
LOC105376684	0.650269
CCDC78	0.649788
MYZAP	0.648812
PLSCR1	0.647872
DENND6B	0.647679
B4GALNT3	0.647339
HSPB8	0.646641
TRABD2A	0.646321
BTBD19	0.646031
PKIG	0.644942
TRIM47	0.643707
IQCG	0.643433
TRIQK	0.643206
TFPI	0.642691
HMHA1	0.641365
PLEKHF1	0.640697
ABCD1	0.639818
ATP6V1D	0.639276
SP6	0.639026
GPX4	0.638063
STAT5A	0.637135
APH1B	0.637009
NPFF	0.636924
CCDC181	0.636803
TP73	0.636535
ARID5B	0.635728
FAM107B	0.635166
TLR1	0.634831
MYO1E	0.634785
PFN4	0.634162
GOLT1A	0.634035
LY6D	0.633916
AREG	0.633754
KRT7	0.633715
INF2	0.633422
DNM3	0.632755
AIFM3	0.632131
RAMP1	0.631793
HYAL3	0.630719
SYT5	0.630049
SOCS6	0.6289
SEC61A2	0.628692
CYB561D2	0.627508
STIM1	0.625879
DENND1A	0.62547
EPHX4	0.622071
HAP1	0.621
FTH1	0.620374
ZFYVE1	0.617982
PITX1	0.617796
RNF157	0.617613
RSPH3	0.617101
TUBA1A	0.617091
MYOF	0.61651
NME7	0.616509
FGD6	0.616503
C19orf81	0.615891
CLDN9	0.615886
C8orf4	0.615731
CCDC96	0.615256
KCTD7	0.614586
ACOT4	0.614083
NPHP1	0.613783
EDIL3	0.613671
RECQL5	0.613124
RNFT1	0.613078
NOD2	0.612415
CASP10	0.612364
TMEM51	0.612052
PLOD3	0.611906
GSPT2	0.611227
TAS1R3	0.610508
SPARC	0.609639
PXN	0.609451
BMP5	0.608787
ARHGEF3	0.608132
LHFPL2	0.607748
CNP	0.607707
LRFN4	0.607615
SNX9	0.606523
SLC15A1	0.606079
CLEC11A	0.605391
FAM222B	0.605344
ENDOV	0.604323
LRRCC1	0.603746
NBEA	0.603235
SLC27A4	0.603137
ZFYVE27	0.602917
STK32C	0.602496
NARR	0.602424
EFHC2	0.601441
C4orf47	0.600732
ANK3	0.600007
WDR37	0.599285
SPRY4	0.598916
SLC20A1	0.598814
FBXO32	0.598415
TIAF1	0.598369
CCDC28B	0.596777
SLC17A5	0.596659
P2RX7	0.59659
NFKB2	0.596017
C15orf65	0.595171
SLC2A1	0.594889
PITPNC1	0.594829
UBE2L6	0.593844
ZNF860	0.593331
CACNG4	0.593071
C1orf116	0.592645
KHDC1L	0.592285
MROH7	0.59199
CC2D2A	0.591987
MAPK11	0.59108
BICD1	0.590616
COPRS	0.590139
HIST1H3J	0.589841
SULF2	0.589207
PRAF2	0.588877
PRKAR1B	0.588497
KIAA1551	0.588233
STXBP1	0.587918
IL17RB	0.586832
MINOS1-NBL1	0.586514
OOEP	0.586293
FAM129B	0.586127
LOC102724993	0.585898
SEC22C	0.585749
HOXC6	0.585266
MLF1	0.585011
PRR7	0.584905
KLHL21	0.584575
RNF213	0.584352
CAMK2D	0.583794
RALB	0.58267
METRN	0.582652
AFAP1	0.582537
PIH1D2	0.582206
HMGA1	0.582201
CD24	0.581873
WFS1	0.579856
GNAO1	0.579261
C9orf116	0.579164
PTRH1	0.579145
TMEM74B	0.578838
PARP14	0.578819
GALE	0.578433
SLC25A20	0.578077
KPNA7	0.577147
SMTN	0.57698
CPQ	0.576552
PCED1B	0.57584
OAF	0.575749
AP1S2	0.575705
HIST1H3E	0.574605
C1orf226	0.574445
PRRT3	0.574371
AMDHD2	0.573123
C10orf10	0.572906
LDLRAD1	0.572631
SAMD9	0.5723
SLC18A2	0.572031
DOCK8	0.571669
C16orf52	0.571164
TMC8	0.569425
TRIM46	0.569365
CDC123	0.569344
SH3KBP1	0.569333
KCTD17	0.568718
GRAMD1A	0.568507
TM4SF18	0.568443
IRS2	0.568234
SHISA5	0.56786
ASPH	0.567429
TMEM198	0.567048
HIST1H2BF	0.566822
ITPRIP	0.564689
APOL3	0.56389
TESK2	0.563701
RASA1	0.563298
STAMBPL1	0.563287
HEXIM2	0.563152
EIF2AK2	0.563076
CA11	0.562985
TRIB2	0.56214
HIST2H2BF	0.561731
SYTL3	0.561716
RSU1	0.561712
AMN1	0.560831
SP110	0.560373
ATP1A1	0.559544
FAM214B	0.558756
RASEF	0.558716
SERPINB6	0.558598
TCTEX1D2	0.558224
BAIAP2	0.557323
ZNF497	0.557011
RHOBTB3	0.556899
CREM	0.556596
LIG4	0.556227
PLEC	0.556096
RIPK2	0.555492
ZBTB46	0.555466
PDLIM7	0.555126
ATP1B1	0.555064
MAPKAPK3	0.554909
MST1R	0.554638
CFAP69	0.553053
CMTM8	0.552572
MKRN2OS	0.552559
NPRL2	0.552544
PRR13	0.551866
PALM3	0.550906
EPHA2	0.550874
LGR6	0.549864
CLIC4	0.549506
DCLRE1C	0.549492
PDLIM4	0.548657
MVP	0.548317
BCO2	0.548269
ABCA3	0.547923
ANKMY1	0.547044
DUSP1	0.546571
NECTIN2	0.545281
VAV2	0.545001
TRNT1	0.544582
RELT	0.543938
TOX2	0.543729
TRIM21	0.543232
LGALS3	0.542995
ATP6V0B	0.542552
AKAP2	0.540406
SNAPC1	0.539639
GBP3	0.539283
RAB18	0.538838
CCDC74A	0.538698
B4GALT1	0.538646
GRB7	0.53749
GSTO2	0.537179
CTBP2	0.53711
ATG7	0.536528
PRKAG2	0.536463
ANXA1	0.536439
ZNFX1	0.535763
KIF3A	0.535668
RGCC	0.535634
CEACAM19	0.535213
FBXO18	0.535089
BTBD11	0.534618
ASS1	0.534289
CATSPER3	0.534279
CELA3B	0.533681
MXD1	0.53351
FBXO36	0.533488
LYNX1	0.533413
SFRP2	0.533027
LLGL2	0.532444
ALDH3B1	0.532243
LGALS7	0.532096
PRRG1	0.532023
KLHL35	0.531995
MORN1	0.531592
APOL4	0.531463
ETS1	0.531452
FAM207A	0.531216
UBE2S	0.530996
IQCH	0.530972
SIMC1	0.530383
DNAJC1	0.530182
AP1S3	0.529861
YPEL3	0.529851
AKNA	0.529226
RAPH1	0.529216
TFPI2	0.529213
PLCD3	0.528522
MCOLN1	0.52844
KRT80	0.527716
FAM83A	0.527586
ZNF697	0.527385
SEC23IP	0.526709
OAT	0.526526
PQLC2	0.525928
CARD11	0.525864
GALK1	0.525697
PPCDC	0.524719
P4HTM	0.524521
SMAD3	0.523907
CACUL1	0.523403
LUM	0.522618
MICAL1	0.522615
ARHGEF1	0.522588
NT5DC3	0.522542
PCMTD2	0.521985
SFR1	0.521607
ARHGAP4	0.521555
ANXA6	0.521536
ACTN4	0.521494
SPATA13	0.521263
KIF1BP	0.521171
SDCBP	0.520584
PXK	0.520027
DDO	0.519949
MTMR11	0.519826
SAMD15	0.519639
USP6NL	0.519561
CCNYL1	0.518943
ARHGDIA	0.518371
LAP3	0.518335
POPDC3	0.517708
STK38L	0.517662
PGLYRP4	0.517648
ITIH4	0.517542
IPO8	0.517465
CXCR4	0.517341
TGM2	0.516768
GPR143	0.516638
AP1M2	0.516388
USMG5	0.515727
MAGEH1	0.515269
CKB	0.514426
CAPRIN2	0.514415
UBE2B	0.513625
MAPRE2	0.513281
OSBPL7	0.513075
CUL2	0.512929
ARHGEF7	0.512797
GCLM	0.512686
RNF145	0.511987
TCEAL3	0.511802
MGMT	0.510251
BBS12	0.510033
LARP4B	0.509928
NPHP4	0.509605
TTLL4	0.50909
EGR4	0.508586
CD81	0.508253
SYNE4	0.508077
MTHFR	0.508028
ZDHHC1	0.507511
AGAP9	0.50715
P3H3	0.506778
ZSWIM3	0.504469
TM4SF1	0.504465
LOC107985971	0.504056
MRPS36	0.503711
KIF27	0.503693
EPC1	0.503376
HTR2C	0.502784
BSPRY	0.502682
ISG20	0.502226
KLK10	0.501982
PSAP	0.501145
FGD4	0.501063
VTI1A	0.500975
UBTD1	0.500859
FRMD4B	0.500795
ETNK1	0.499836
TK2	0.499257
DTX3L	0.498236
PIP4K2C	0.498083
CBWD6	0.497888
FAM65A	0.497289
KRBOX1	0.496987
CHMP5	0.496848
ITGB4	0.495508
LCN2	0.495328
PPA1	0.494771
ZBTB7A	0.494121
CCNA1	0.493635
STEAP4	0.493584
GNAI2	0.492713
PLIN2	0.492695
PHLPP2	0.492423
TRPM2	0.491553
SLC16A1	0.491535
BFSP1	0.491511
YPEL2	0.491305
AGO2	0.490569
MON1A	0.489583
ADRA2C	0.489406
TNFAIP8	0.48911
LOXL4	0.487583
CARS2	0.486786
PARP3	0.486738
SLC35E4	0.486717
SLC39A11	0.485901
KDELR3	0.485894
ANO1	0.485484
KIF5B	0.48533
RRP9	0.484392
DRC3	0.484375
FAM92A1	0.483997
TSPAN2	0.483779
SLC38A7	0.48356
FAM114A1	0.483511
ATP6V1C1	0.483386
DVL1	0.483275
ANKRD37	0.483262
RBP4	0.483116
GNA13	0.483072
METTL15	0.48204
FGFRL1	0.481888
CMTM4	0.481827
FAM96B	0.481344
PADI2	0.480416
C10orf54	0.480382
CHST15	0.479606
GBGT1	0.479479
SPTBN1	0.4792
SP100	0.47908
TGFB2	0.478944
KIAA0556	0.478575
PTK6	0.478516
PTP4A1	0.478228
C5orf45	0.478018
RENBP	0.477908
POR	0.477795
HIST1H2BJ	0.477417
GOLT1B	0.477192
RAB8B	0.476898
TRIM8	0.476826
COMMD3	0.476522
MOK	0.47611
GDA	0.475249
MALL	0.475146
HYAL2	0.474985
KIF3C	0.474732
RELL1	0.474557
CDRT4	0.474255
RAB11FIP2	0.473821
CKLF	0.473365
CDKL3	0.473029
ABHD6	0.472715
BRI3	0.472325
PPL	0.47131
IL15	0.470053
HOXC9	0.469421
MGAT4B	0.469003
TRANK1	0.46842
CCL28	0.467958
PHYH	0.46782
PECR	0.467789
AHNAK2	0.467587
FHDC1	0.467507
GTF2IRD1	0.467326
STBD1	0.467007
SLC25A16	0.466542
L3MBTL1	0.466498
DNAJC17	0.466017
PKM	0.465918
HLA-DQB1	0.465354
LRRC75B	0.465258
FRA10AC1	0.465095
SLC30A4	0.464982
FAM219A	0.46473
STPG1	0.464611
SRGAP1	0.464491
SPACA6	0.464291
SULT1A1	0.463995
NLGN2	0.463865
MAP4K4	0.463549
PFKFB3	0.463446
PLEKHO2	0.463408
PAQR6	0.463198
LAMTOR5	0.46291
PINK1	0.462224
VPS28	0.462162
ACVR1	0.461931
MAP3K5	0.461823
HSPA14	0.461755
STAT2	0.461637
SNAI1	0.461545
UGCG	0.461183
MRPL15	0.461103
SBDS	0.461011
MRAS	0.460892
AGPAT2	0.460827
MTFR2	0.460243
TANGO2	0.460168
C2orf81	0.459992
HRCT1	0.459967
VASP	0.45932
LTBP3	0.459217
FERMT2	0.459029
PSTK	0.458939
GPR3	0.458753
IDS	0.458229
SLC25A39	0.457651
AEN	0.457364
HIST1H2AK	0.45731
C18orf32	0.457113
TESMIN	0.45684
CAPG	0.456067
BUB3	0.456047
FAAP20	0.454534
MCMBP	0.454386
C1orf233	0.454181
PPP3CB	0.453923
SMKR1	0.452943
MYO10	0.452913
ACOT8	0.452868
UPF2	0.452338
RHEBL1	0.452016
LRRC29	0.451736
C6orf1	0.451508
CSPP1	0.450614
SLC15A4	0.450283
NABP1	0.450272
AIM1L	0.450059
FAM3C	0.449803
ASAP2	0.449595
ZNF622	0.449421
NSUN5	0.449074
FAM183A	0.448957
THSD4	0.448812
DUSP3	0.448721
STK10	0.448312
CXorf40A	0.44809
GOPC	0.448031
PDXP	0.447772
CCPG1	0.447263
CNIH2	0.44725
RIOK3	0.447174
CREG2	0.447131
MAP3K12	0.44707
VMP1	0.4467
PHOSPHO2	0.446652
CDC42EP4	0.446616
ITGB8	0.446562
TUBGCP2	0.446059
ZNF488	0.445479
HIST3H2A	0.445203
TNFAIP3	0.445083
TUBB2A	0.44503
UHRF1	0.445007
AK7	0.444147
TNNC1	0.444036
ASB13	0.444008
MRPS23	0.443587
PGM1	0.443485
ATG2A	0.443068
TDRD7	0.44298
C1orf216	0.442696
DNAJC25	0.442596
GNE	0.442584
KTN1	0.440561
UBE2C	0.440503
MGLL	0.440454
LGALS9	0.440414
ATOX1	0.440399
SH3GLB2	0.439944
ZNF473	0.43974
AP4M1	0.439308
MCAT	0.439289
PSENEN	0.438948
CCNH	0.438779
ADAP1	0.438608
SLC2A6	0.438237
TLE6	0.438095
NAT14	0.43763
CPA1	0.437514
C14orf79	0.437354
HIVEP3	0.43726
ACTN1	0.437194
MAP9	0.437167
LAMC2	0.436969
MACC1	0.43681
KIF12	0.436523
RASSF4	0.436444
EPB41L2	0.436393
SLC28A3	0.436333
MPZL3	0.436127
CBFB	0.436118
PLOD1	0.435705
C8orf44	0.435264
SRGAP2	0.435219
LINC01272	0.433776
FXYD5	0.432636
NFKBID	0.432349
ABI1	0.432215
SLC4A7	0.431905
SRA1	0.431874
MIPEP	0.4313
HOMER3	0.431214
FXYD6	0.430832
SRMS	0.430569
STX1A	0.430106
RAB27B	0.429304
VWA5A	0.4293
POLM	0.429263
GRINA	0.429242
FLRT3	0.428843
HPS1	0.428587
SYCE3	0.428529
ZNF579	0.428509
YRDC	0.428269
THBS1	0.427345
SERPINB1	0.427243
NTMT1	0.426721
C16orf46	0.426602
BBS5	0.42626
NACC2	0.425491
NQO1	0.425298
SDC4	0.425293
RBP7	0.424868
CTSD	0.424634
WWC3	0.423937
ATE1	0.42333
HSP90AA1	0.423233
HIPK2	0.422983
CHMP4C	0.422742
KIN	0.422015
COQ10B	0.42195
PARD6A	0.421349
FBXL15	0.421288
CPEB4	0.421165
CTNNAL1	0.420163
SLC38A9	0.41982
ZNF593	0.419469
VASH1	0.419328
ELOVL1	0.419099
ARPC1B	0.418862
COTL1	0.418511
SH2B3	0.418331
ZDBF2	0.418225
CAST	0.418211
VEGFC	0.417693
PADI1	0.417282
TMEM104	0.417065
ZC2HC1C	0.416998
FAM175A	0.416266
ACOX1	0.416144
TUBB6	0.415436
TRPV1	0.41514
IFT57	0.415119
TM7SF3	0.41492
TMEM173	0.414851
MTG1	0.414327
RELL2	0.413981
PFKFB2	0.413389
PMM1	0.413361
LEPROT	0.413221
SKAP1	0.41305
IMPDH2	0.412946
ATG14	0.41285
RECQL	0.412751
PLCG2	0.412723
EPOR	0.412482
TWF2	0.412097
FURIN	0.41189
MED10	0.410743
LSR	0.41044
ACTR1A	0.410436
MSLN	0.41028
MYO15B	0.409829
FAM63A	0.409799
MAFG	0.40921
ENTPD2	0.409097
MCMDC2	0.408415
MAGEA9	0.408394
SPATA7	0.408366
AK9	0.408291
ZRANB1	0.407984
MCAM	0.407661
CTBS	0.407659
CNNM4	0.407438
PC	0.407365
TMEM92	0.40712
IFT88	0.407016
NT5C2	0.406657
FAM177A1	0.40651
PRELID3A	0.406368
FAM46B	0.406349
NPC1	0.406257
FLNB	0.406146
TNIP2	0.406136
GBP1	0.405844
EHBP1	0.405356
DALRD3	0.405183
BCAP29	0.404967
FAM26F	0.404895
ATP6V0D1	0.404773
HIST4H4	0.404751
HLA-A	0.404556
PSCA	0.404099
MAD2L2	0.404045
CARD19	0.403972
PTER	0.403784
INPP5A	0.4036
HECTD3	0.403575
MSRB1	0.4031
CHST3	0.402783
ADK	0.402737
37865	0.402042
RETSAT	0.401989
RANBP17	0.401797
VAV1	0.401791
SAP30BP	0.401778
ZNF334	0.401401
GSKIP	0.401174
RNASEK	0.400786
CAP1	0.40077
SRXN1	0.400692
E2F5	0.400101
FBXL16	0.399654
DNAL4	0.399436
SLC29A3	0.398872
SUMO4	0.398626
DEFB1	0.398621
ZBTB47	0.398373
MAP3K14	0.398288
DNAJC12	0.398131
DUSP6	0.398033
C17orf97	0.397879
TAF13	0.397711
NAT6	0.397535
TOM1	0.39735
CCDC121	0.397113
PROSER3	0.397063
MAGEB2	0.397025
RAP1A	0.396953
BOK	0.396481
MT2A	0.396181
ZC3HAV1	0.396169
AIG1	0.395948
CLIP1	0.395929
SLC39A4	0.395916
SCO2	0.395796
IL32	0.395543
MAP1LC3B2	0.395488
EIF4EBP3	0.395403
CNN3	0.395319
SHC1	0.394806
SIPA1	0.394585
ODF2L	0.394549
TNFRSF12A	0.394426
ARID3A	0.39394
PWWP2B	0.393835
MYO1C	0.393778
SH3BGRL3	0.393722
DNAJC7	0.393531
FAM204A	0.393481
DDIT4	0.393355
PRPF18	0.392866
CITED4	0.392848
40422	0.392523
TGFBR2	0.392487
DPCD	0.392454
RTKN	0.392163
HIST1H2AG	0.391678
SMURF1	0.391484
PTTG1IP	0.391478
STK16	0.39109
ATP6V0A1	0.390733
AKT1S1	0.390677
LATS2	0.389869
C11orf24	0.389483
PLXND1	0.389412
POP3	0.389304
MAPK1IP1L	0.389095
NUDC	0.389023
MYL5	0.388867
FBXO41	0.388816
MT1G	0.388594
IDI2	0.388569
BRD9	0.388353
HIST1H2AC	0.388101
LIMK1	0.387632
LOC101929895	0.387588
NAE1	0.387556
NEK11	0.387153
TMC6	0.387125
ACHE	0.386997
NFATC2	0.386888
IFT22	0.386825
ATP6V1G1	0.386724
NHEJ1	0.386574
C18orf8	0.386139
GLB1L2	0.385719
ABCB8	0.385371
KRT18	0.384968
HIST2H3D	0.384932
GLS	0.384916
INPP5F	0.384748
PCTP	0.3846
YIF1A	0.384407
EVPL	0.384359
LOC101930307	0.383789
HCCS	0.383532
NDRG4	0.383502
SAT2	0.383248
ARHGEF28	0.382924
CRIP2	0.382688
C12orf75	0.38231
TNFRSF1A	0.382251
NSUN6	0.382134
LOC107984449	0.382129
PHLDB1	0.381535
AXL	0.381308
PSMA5	0.38124
TTC39A	0.380865
ADTRP	0.38074
SLC8B1	0.380645
TXNL4B	0.380492
APBB1	0.380015
RAPGEF2	0.379768
S100A1	0.379275
TCTN1	0.379222
MB21D1	0.379205
PLBD2	0.37914
BIN1	0.379123
CYB5D2	0.378969
LRRFIP1	0.378736
B9D1	0.378646
ZMIZ2	0.378625
ZSCAN5A	0.378395
RRP12	0.378311
TMEM53	0.378143
PGLS	0.37813
TRPS1	0.377929
IL17RC	0.377745
JOSD2	0.377624
CRIP1	0.377497
PDE9A	0.377117
UBA3	0.377099
MLLT10	0.376846
HTRA2	0.376794
KANK2	0.376636
NOL3	0.376234
CCDC106	0.376231
C10orf11	0.376121
ACD	0.376051
C5orf66	0.375775
GULP1	0.375707
TOB1	0.375537
CCND3	0.375383
ACADVL	0.37535
HIC2	0.375304
DYRK1B	0.3753
SMAD7	0.375167
SLC25A46	0.375036
C10orf76	0.374671
RTN4R	0.37455
PDK2	0.374534
PHF11	0.373672
ABHD14B	0.373273
MISP	0.373194
ELMO3	0.372572
TMF1	0.37251
CAPN12	0.371888
POLR2J2	0.37152
RHPN2	0.371225
COL12A1	0.370766
SYNM	0.370353
ELOVL7	0.370183
CENPV	0.369959
SCARB1	0.369848
HAGH	0.369135
BRIX1	0.368875
TRIP10	0.368804
LMBR1L	0.368606
TMEM265	0.368565
SPACA9	0.368524
LAMA4	0.368502
MT1F	0.368312
ARHGAP17	0.368162
SUPT4H1	0.368132
APOL1	0.368064
RHOD	0.367849
SOWAHC	0.367653
STAC3	0.367383
LASP1	0.367184
NOCT	0.367106
DHRS9	0.366998
NCOR2	0.366931
RASGEF1B	0.366891
DMWD	0.366638
APOL6	0.366498
IL18BP	0.36609
MAFF	0.366014
C15orf41	0.36591
MINPP1	0.365857
IQGAP2	0.365745
RDX	0.3656
SURF2	0.364866
HEXDC	0.364698
WRB	0.364666
SMS	0.364587
DNM1L	0.364397
MED31	0.364249
ACP6	0.364032
HSPBP1	0.363909
CSGALNACT2	0.363719
SYT1	0.363559
TRIO	0.363444
B2M	0.36332
ARRB1	0.363206
EMP1	0.363072
CFAP36	0.362814
PPP2R2D	0.362802
LYRM9	0.362732
OSGIN2	0.36266
CEP57L1	0.362617
CHDH	0.362609
MORN4	0.362601
TMEM139	0.362174
C15orf39	0.361908
CDK5	0.361881
ARHGAP39	0.361831
CASC10	0.361625
ZNF23	0.36159
KRT19	0.361383
CASKIN2	0.361219
ATP6V1E1	0.361208
ADA	0.36069
FAM175B	0.360623
PPIF	0.360604
CPD	0.360292
PAQR3	0.359812
NCF2	0.359657
EXOC6	0.359636
TANC2	0.359454
ZC3H12A	0.359398
BCCIP	0.35936
DBN1	0.35934
MFAP3L	0.359237
DENND2D	0.359093
RTCA	0.358895
TRAF3IP1	0.358728
VSIG10	0.35868
H2AFJ	0.358468
RUNX3	0.358441
SEC13	0.358331
CCNY	0.357754
AFF4	0.357075
PAX8	0.357073
AAGAB	0.357008
TBC1D16	0.356408
LOC283278	0.356385
PES1	0.356156
TPCN1	0.355807
CSRNP1	0.355782
FAM122C	0.355445
PIP5KL1	0.355265
RHBDD2	0.355189
TMEM68	0.355117
ABHD11	0.35481
USP2	0.354219
SLC25A37	0.354182
LIMCH1	0.354122
EIF2B2	0.354114
POMGNT2	0.354098
DCUN1D2	0.35371
DERL1	0.353676
MED8	0.353575
NET1	0.353158
TRIM22	0.353148
IRAK2	0.352805
ASAP1	0.352321
CSRP1	0.352064
G6PC3	0.351891
CARD10	0.351884
C9orf16	0.351424
CLEC16A	0.351419
HABP4	0.351303
KLHL17	0.351011
TFDP1	0.350914
TBL2	0.350841
ATP5C1	0.35082
HDAC5	0.350544
MNT	0.350517
VPS33A	0.350451
TCAIM	0.350427
CEP55	0.350335
S100A14	0.350229
BST2	0.349893
OBFC1	0.349757
DNAJB12	0.349706
ECHDC2	0.349615
ACAA2	0.349423
CETN2	0.349332
VDAC2	0.349131
WDR60	0.349102
40787	0.348934
IDH3A	0.348887
MLPH	0.348732
SPNS2	0.348519
LYPLA2	0.34786
RAB37	0.347483
SUV39H2	0.34714
HOXC4	0.347028
CHUK	0.346452
MROH1	0.346416
CLTB	0.346279
SLFN13	0.346116
FAM188B	0.345925
EIF5AL1	0.345615
CNEP1R1	0.34561
CANT1	0.345371
ACOT11	0.344976
TKT	0.344934
IRF1	0.34471
YWHAZ	0.344389
RUNX2	0.344261
PARP4	0.344161
GLCCI1	0.343396
ID3	0.343374
NTN5	0.343369
RICTOR	0.343206
TTC21A	0.343148
MYO5A	0.343044
AMY2A	0.342913
NECTIN3	0.342903
DNAJB2	0.342481
YOD1	0.342253
AKIRIN1	0.342031
PCID2	0.341986
BGLAP	0.341945
CD72	0.341616
TNFSF12	0.341498
APP	0.341444
TRIM25	0.341301
LACTB2	0.341176
ENG	0.340948
RCOR1	0.340819
RRAS	0.34066
WHRN	0.340583
ERCC6	0.340296
RSRP1	0.340254
TPRN	0.339929
LOC101928093	0.339836
OPN3	0.339769
PLEKHG4	0.339562
ZNF627	0.339534
CYB5R4	0.339413
GPATCH3	0.339266
ZFYVE19	0.339194
LBH	0.339123
ANKRD50	0.3391
STK3	0.338975
B3GAT3	0.338941
NEK7	0.338846
SOWAHB	0.338729
XDH	0.338714
LRP11	0.338647
ACE2	0.338482
PRSS21	0.338288
SHKBP1	0.338286
ARPC3	0.33821
FUT11	0.338103
ZNHIT2	0.337587
PRKAR2A	0.337252
MEGF9	0.337226
KBTBD4	0.33722
ZSWIM8	0.337113
ODF2	0.337068
BNIPL	0.336975
AIM1	0.336805
CDC25B	0.336583
EXOSC4	0.336358
ATP6AP1L	0.336298
ITGB1	0.336089
FLNA	0.335924
AVIL	0.335894
NEBL	0.335853
TAOK3	0.335718
COQ4	0.335711
MTCH1	0.335594
COL9A3	0.335589
TSPAN1	0.335524
CCT5	0.335451
FASTKD3	0.335226
MRPL36	0.335146
HIST1H2AM	0.335008
RELB	0.334892
MRPL38	0.334851
MTFR1	0.333566
ATF7	0.333515
IGF2BP3	0.333346
SLMAP	0.333324
UBE2Z	0.333313
KRT8	0.333239
VWDE	0.333212
CDC42EP2	0.332824
WDR54	0.332762
STAT3	0.332719
CD274	0.332627
ATP6V0C	0.332519
BIRC3	0.332385
MYH14	0.332379
EXOSC1	0.332128
SCARB2	0.331761
WDR55	0.331677
LOC107986873	0.33162
TANK	0.331282
DDX11	0.331212
LAMP1	0.331203
COQ10A	0.331107
CSNK2A3	0.331063
CSNK1D	0.330659
GRHPR	0.330458
HOXC13	0.330357
RCAN1	0.33016
MED25	0.3301
TACC2	0.330032
PTRH2	0.329981
PUSL1	0.329941
ICT1	0.329838
AAED1	0.32952
AHR	0.329508
MRPS16	0.329431
LDHA	0.329167
C12orf10	0.329153
RAD50	0.328907
KCTD13	0.328848
C19orf12	0.328804
UTP11	0.328482
SLC25A45	0.328438
NPEPPS	0.32796
SKIL	0.327913
BAHD1	0.327799
LOC107983998	0.327626
KLC2	0.327541
INO80B	0.327492
HIST1H2BK	0.327447
OGG1	0.327407
MTRR	0.327379
LZTFL1	0.327344
LDLRAD3	0.327235
IMPAD1	0.326975
TMEM132A	0.326765
MARK4	0.326352
NAT1	0.325607
MFSD1	0.3256
SOX13	0.325058
CUL4A	0.324635
HERC3	0.324631
F12	0.324434
C19orf66	0.324261
ARMC9	0.324186
ZNF688	0.324155
PQLC1	0.324029
CUEDC2	0.323662
NKIRAS1	0.32358
MEX3C	0.323012
SMNDC1	0.322988
CCDC122	0.322888
FBXL8	0.322787
RNF14	0.322666
ZNF24	0.322221
MST1	0.322057
GMPPA	0.321943
KIRREL	0.321858
BICDL1	0.32182
C5orf24	0.321755
ABTB1	0.321695
TMTC1	0.321407
GAPDH	0.321354
LCMT1	0.32116
[truncated: 9,415 more rows]

## Sheet: ranked CAFs sgNEG vs sgTP63
gene	log2(fold_change)
2210010C04Rik	4.31169
Try4	4.12779
Pnlip	4.07113
Cela2a	3.89795
Pla2g1b	3.77229
Ctrc	3.76126
Zg16	3.19171
Rnase1	3.12077
Cela3b	3.12052
Cpa2	3.11157
Cpb1	3.10876
Sycn	3.04846
Cel	3.0478
Ctrl	2.86756
S100a8	2.84689
Clps	2.8266
Amy2b	2.79955
Amy1	2.79507
Wfdc18	2.7644
Cpa1	2.62723
Prss2	2.54791
Gp2	2.54678
Megf11	2.41609
Pnliprp2	2.39686
Spp1	2.32723
Try5	2.18366
Mcpt1	2.16897
S100a9	2.14725
Mmp7	2.11336
Reg2	2.04419
Arg1	1.97479
Sp6	1.96583
Meox1	1.93981
Pnliprp1	1.8737
Reg3a	1.86788
Ctrb1	1.79549
Wif1	1.7574
Reg1	1.73873
Reln	1.6916
Spink1	1.67514
Tac2	1.58994
Cyp26a1	1.58462
Enpp1	1.56086
Egfl7	1.5522
Tnfsf18	1.5328
Pmaip1	1.5255
Nts	1.48602
Ctss	1.48564
Sema7a	1.45824
Cspg4	1.41708
C1qb	1.41236
Reg3b	1.4016
Dmbt1	1.36234
Apold1	1.35722
Nes	1.32656
Cd53	1.32494
Gm21992	1.3136
Foxs1	1.30812
Mmp13	1.28776
Angpt2	1.28692
Plekha6	1.27281
Tmem204	1.26625
Pecam1	1.26469
Adamtsl3	1.26243
Etl4	1.25786
Thbs4	1.25441
Slc40a1	1.25145
Tie1	1.24184
Cldn5	1.2009
C130074G19Rik	1.17816
Enho	1.17698
Sox18	1.17448
H2-Q8	1.16944
Etv4	1.1679
Wfdc17	1.15963
Tmem59l	1.1515
Mmrn1	1.14438
Klk1	1.13216
C1qtnf3	1.13029
Oas1g	1.09252
Serinc2	1.08843
Il1b	1.08607
Rsad2	1.08293
Lyve1	1.08286
Ifit3b	1.07849
C1qa	1.05428
Gng2	1.05161
Adgrg3	1.051
Tbx2	1.0437
Col11a1	1.03983
Col8a1	1.02648
Gzmc	1.01765
Tmem200a	1.01014
Bhlhe41	1.00558
Heyl	1.00107
Plekha7	0.996862
Shc4	0.992026
Adamtsl2	0.985513
Tnfsf4	0.983629
Gbx2	0.963571
Frem1	0.962403
Aplnr	0.959245
Gareml	0.956942
C1qc	0.953724
Gpbar1	0.951782
Col8a2	0.921065
Ch25h	0.919995
Sparcl1	0.914742
Unc5b	0.911656
Col23a1	0.905977
Prelid2	0.904744
Fcer1g	0.903486
Cmpk2	0.896272
Tnc	0.890916
Cdh5	0.879535
Tmeff1	0.874579
Duox1	0.873974
Stab1	0.868895
Ephb6	0.868789
Ltbp2	0.853945
Bmp6	0.846339
Zfp382	0.84621
Gucy1b3	0.846124
Igf2	0.840649
Nrep	0.831738
Cela1	0.824061
Cmklr1	0.818371
Abca8a	0.816533
Ifi44	0.816487
Actg2	0.816452
B230217C12Rik	0.81398
Arxes1	0.810785
P2ry14	0.805084
Tmem132c	0.792551
Igfbp2	0.785362
Spry1	0.783921
Tek	0.78343
Comp	0.783238
Unc5c	0.779605
Plvap	0.778092
Gpm6a	0.769561
Slc6a7	0.768358
Ets1	0.768204
Rec114	0.756712
Gdf10	0.756689
Lyz2	0.752822
Moxd1	0.752012
Sertad4	0.750409
Chchd10	0.750279
Mcam	0.747066
Ckb	0.744927
Folr1	0.744265
Ifit3	0.741347
Epha3	0.729947
Serpine2	0.727106
Ptprn	0.723523
Frzb	0.720601
Arxes2	0.719218
Ntf3	0.715942
Ddc	0.714751
Camk1g	0.714635
Masp1	0.711199
Gucy1a3	0.697971
Gm13889	0.697248
Cxcl14	0.696593
Smox	0.693844
Ifit1	0.693447
Mpp6	0.691505
Lcorl	0.690798
Angpt1	0.690438
Syt13	0.68913
Ccnd1	0.687738
Rbm46	0.680469
Apod	0.67539
Mest	0.675123
Rad51ap1	0.67478
Oas1b	0.667736
Ctgf	0.663805
Lama1	0.661699
Gsta3	0.657616
Pcdh20	0.657255
Dio3	0.656959
Nog	0.655435
Zim1	0.652852
Nkd2	0.65122
Itgbl1	0.648649
Tinagl1	0.646154
Myl9	0.642148
Dkk2	0.641701
Txnip	0.641544
Ccl8	0.63832
Il15	0.636465
Angpt4	0.635185
C1qtnf5	0.634434
Nme6	0.633818
Tgfbi	0.633543
Mmp11	0.632957
St6galnac2	0.625348
Adat3	0.624383
Dusp28	0.620314
Fam83a	0.618444
Tagln	0.618175
Alox5ap	0.614511
Myo1e	0.610985
Isg15	0.609151
Patz1	0.608328
H2-T24	0.607035
Ddit4l	0.606436
5730559C18Rik	0.606202
Cx3cl1	0.606067
Mgp	0.605119
Rspo3	0.604873
Rapgef3	0.60425
Krt8	0.600364
Krt18	0.600144
Inhba	0.599827
2610044O15Rik8	0.599738
Rwdd3	0.595354
Gtse1	0.594976
Crabp1	0.593843
Atp6v0a4	0.592171
Ccl27a	0.590665
Bdnf	0.587108
Ddah1	0.58581
Zfp623	0.583592
Jup	0.581334
Mtss1	0.579623
Hoxa2	0.578635
Tgfb1	0.577646
Pth1r	0.576235
Ank	0.573738
Cadm4	0.572636
Myl6b	0.570381
Pigv	0.570248
Zswim7	0.566353
Cd59a	0.56572
Frmd4a	0.563507
Fmod	0.562354
Fxyd6	0.562105
Trp53i11	0.560606
Zbtb48	0.5603
Sfrp5	0.55976
Cdc42ep3	0.558223
Ubash3b	0.557602
Cilp	0.557034
Igfbp3	0.554085
Cfp	0.553381
Kcns3	0.549787
Pgf	0.549289
Msrb2	0.548307
Rtp4	0.548164
Pcsk5	0.548002
Hist3h2a	0.54392
H2-L	0.540505
Oas3	0.539407
Ndc80	0.537717
Nek2	0.537201
Rai2	0.534012
Sdc3	0.53324
Ucp2	0.532284
Des	0.532095
Igfbp5	0.531222
Efna1	0.531099
Ajuba	0.528895
Ehd3	0.528704
Ccdc152	0.52711
Abhd10	0.52637
Coil	0.526291
Smim8	0.525994
Amigo1	0.525684
Ptch2	0.524668
Duoxa1	0.52418
Fignl1	0.523238
Ces1d	0.520798
Zfp938	0.518837
Gpc1	0.518236
Cdkn3	0.518193
Gimap6	0.516312
Inip	0.516056
Lpar6	0.514494
Ednra	0.514123
Ccl6	0.511664
Atp1a3	0.5116
Arap3	0.511101
Cdh3	0.510463
Bst2	0.510205
Masp2	0.510204
Irf7	0.51018
H1fx	0.509877
Insc	0.5098
Flt4	0.509694
Acta2	0.50953
Ap1s2	0.508121
Mgll	0.507872
Fam53b	0.507357
Trib3	0.507051
Kcnk2	0.506914
3110062M04Rik	0.505825
Flywch2	0.505134
Gm12250	0.504549
Gng11	0.504256
Gins3	0.503562
Bmp4	0.501757
Sall2	0.501685
Wnt6	0.500193
Plekhh3	0.498573
Cyp27a1	0.498338
Nr1d1	0.498206
Myo7a	0.497766
Erg	0.497562
Ankrd23	0.497114
Ndufa4l2	0.4969
Tle2	0.495796
Arid3a	0.493184
Krt7	0.490879
Tyrobp	0.487522
Fhl2	0.486828
Pnisr	0.486743
Hoxb4	0.485405
Tes	0.481715
Mgst2	0.481461
Cpxm2	0.48072
Fam64a	0.480416
Hoxa3	0.477673
Tmem178	0.477169
1810062G17Rik	0.474875
Kif21b	0.474252
Sele	0.473611
Tmcc3	0.473378
Ctla2b	0.472041
Hspb7	0.471743
Syndig1	0.471406
Msantd3	0.466082
Cenpl	0.464946
2900026A02Rik	0.464661
Gm11744	0.464323
Crlf1	0.462925
Ctsc	0.462281
Lifr	0.460396
Dtx3l	0.460364
Cdc25b	0.460203
Arhgef6	0.459838
Zfp729a	0.459788
Pin4	0.455559
Rabl3	0.454814
Cpe	0.452429
Fam198b	0.45235
F830016B08Rik	0.45183
Rap1gap2	0.451602
Sertad3	0.44875
Stc2	0.448654
Slc8b1	0.448121
Mgst3	0.447899
Tspan18	0.446827
Aqp1	0.446018
Specc1	0.445076
Fam13c	0.444692
Pet117	0.443055
Wnt5a	0.44286
Tenm3	0.442323
Mdfi	0.441723
Irgm1	0.441573
G0s2	0.439969
Dpp6	0.439005
Dhx58	0.436915
Fgf9	0.435286
Rrm2	0.434491
Podxl	0.434262
Mx2	0.432908
Rin1	0.432462
Fam20a	0.432351
Lrch2	0.432042
Dysf	0.431517
Smoc2	0.430998
Fmnl3	0.430593
Spaca6	0.429587
Hspa12b	0.429585
Itga3	0.42947
Eln	0.429384
Hoxa4	0.428457
Cep128	0.428437
Ptn	0.426455
Tlr6	0.426249
Chrnb1	0.426247
Rpl32l	0.426048
Pla2g16	0.425667
Ptch1	0.425635
Adcy2	0.42555
Tbc1d8	0.425151
Slc6a6	0.422869
Uck2	0.4227
Fahd1	0.422101
Nat2	0.421829
Slfn8	0.420993
Gli1	0.419853
Siva1	0.419489
Irgm2	0.419086
Zfp397	0.41873
Coa4	0.418479
Myo1b	0.418178
Olfml3	0.418036
Ccin	0.417023
Meox2	0.416922
Rgs16	0.415606
Adamts12	0.415524
Hs6st2	0.415477
Jrkl	0.415124
Has2	0.414447
Dpep2	0.414122
Traf4	0.413351
Kif2c	0.412963
Hsd11b1	0.412681
Col7a1	0.412396
Mthfs	0.411514
Nuak1	0.411222
Itprip	0.410719
Mylk	0.409861
Cyp4b1	0.409533
Iigp1	0.405345
Loxl3	0.405037
Tead2	0.403994
Lrrc15	0.403544
Nr1d2	0.403402
Zfp566	0.40338
Psrc1	0.402069
Dusp19	0.401825
Piezo2	0.400561
Lin52	0.400531
Rsc1a1	0.40019
Kank3	0.398951
Oas2	0.39884
Myo10	0.398756
Kif26b	0.397684
Cdc20	0.39692
Ifi27l2a	0.395385
0610011F06Rik	0.395337
Apol9b	0.39492
Hmgcs2	0.394229
Cenph	0.393641
Zfp579	0.393174
Ass1	0.391547
Aurkb	0.388724
Cemip	0.388691
F2r	0.388365
Fam111a	0.388299
Timp3	0.388033
Tbx3	0.388014
Plcd3	0.387842
Rps27	0.385054
Ccbe1	0.384949
Dio2	0.384922
E430018J23Rik	0.384665
Rnf149	0.384062
Glcci1	0.383809
Tmem265	0.383611
Pik3ip1	0.383598
Iffo2	0.383532
Trdmt1	0.383184
Fam210b	0.382804
Cxcl9	0.382711
Pex10	0.38253
Cyp51	0.382366
Porcn	0.381581
Mxra7	0.380122
Metap1d	0.378621
Eid2b	0.378418
H2-Q7	0.378348
Nox4	0.377823
Spint2	0.377449
Zfp647	0.37681
Zwilch	0.375918
Alad	0.375167
Fam198a	0.373509
Gpr135	0.37208
Dbf4	0.371636
Stard8	0.371185
Qprt	0.370572
Klhdc8b	0.37048
Gbp3	0.370382
Gng8	0.369986
Smpd3	0.369787
Aoc1	0.369101
Irf9	0.369071
Icosl	0.368021
Zfp867	0.367751
Cdc42ep4	0.367709
Lsp1	0.366761
Ier5l	0.366302
Sirt4	0.365663
Socs1	0.363857
Card10	0.363553
Sgk3	0.363402
Slc16a3	0.362991
Pcsk6	0.362478
Pcdhga10	0.362175
Fbxl12	0.361891
Zfp60	0.361883
Prr11	0.36182
Gpc3	0.361364
Adam19	0.361144
Pdhx	0.360109
Sorcs2	0.359788
Pdgfc	0.359279
Cenpp	0.359072
Naa16	0.358929
Nkx2-3	0.35862
Zfp185	0.357729
Hmgb1	0.35741
Srr	0.357016
Nudt13	0.356842
Tnfsf9	0.356741
Tpx2	0.355627
Gdf6	0.355533
Bub1b	0.355052
Zfp81	0.354876
Zfp160	0.353709
Susd2	0.35338
Tmpo	0.3533
Trim21	0.353143
Efna4	0.352435
Ogt	0.352095
Endod1	0.352039
Angptl4	0.351877
Armcx4	0.35174
Hscb	0.351517
Tspan9	0.349583
Rassf3	0.349027
Srpx2	0.348609
Lmcd1	0.348373
Helq	0.348221
Marcks	0.347579
Haghl	0.34741
Nlrc5	0.347083
Galnt18	0.347055
Thy1	0.346619
Zfp618	0.346542
Zfp758	0.345859
Ccl11	0.345701
Aurka	0.345583
Fkbp1b	0.345547
4930427A07Rik	0.344797
Fat4	0.344728
Hpca	0.344465
Birc5	0.344258
Vamp5	0.343944
Stbd1	0.342531
Plppr3	0.342073
Id2	0.341989
Vrk1	0.341817
Haus7	0.341641
Fibin	0.341451
Vsig10	0.341333
4930503L19Rik	0.341038
Ms4a4d	0.340964
Apol9a	0.340449
Mthfsl	0.338148
Gm527	0.338094
Cgnl1	0.337354
Bace1	0.337095
Haus8	0.336826
Nradd	0.33643
Zfp946	0.336367
Mki67	0.335833
Ctla2a	0.335798
Hoxb8	0.335274
Krt19	0.335121
Rrnad1	0.33508
Limk2	0.334105
Prokr2	0.333951
Itgb5	0.333794
Vwa1	0.333241
Tpmt	0.33239
Jag1	0.332196
Pcdhga11	0.331837
Stat2	0.331588
Fut4	0.33116
Notch3	0.330375
Col12a1	0.330301
Arrdc4	0.329893
Uchl1	0.329774
Dyrk1b	0.329013
Msln	0.328988
Adgrl2	0.3286
Hnmt	0.328506
Angptl8	0.328359
S1pr2	0.32714
Slc7a7	0.32681
Aptx	0.326701
Lgals7	0.326665
Vstm5	0.326263
Mdfic	0.325497
Lars2	0.325341
Mdk	0.325317
Ttc14	0.324618
Col28a1	0.324599
Cirbp	0.323985
Pak1	0.323929
Zfp787	0.323422
Col4a2	0.323175
Mcm7	0.323123
Dimt1	0.322253
Scarf2	0.322008
Tspan11	0.321663
Phf11b	0.321471
Kif20a	0.321191
Gadd45g	0.321139
Pik3r1	0.320014
Nexn	0.319874
Rnf219	0.319337
Sema4c	0.319331
Podxl2	0.31879
Gramd4	0.318623
Hoxb2	0.318601
Bmf	0.318216
Pcdhgb6	0.317651
Fam76b	0.31669
Rnf169	0.316626
Zfp943	0.316247
Gpr173	0.315736
H2-DMa	0.31563
6330416G13Rik	0.314578
Plin2	0.313954
Socs5	0.31364
Parp11	0.313386
Usp18	0.313236
Csdc2	0.313107
Dnmt3l	0.310138
Pkig	0.310084
2810417H13Rik	0.309881
Imp3	0.309606
Tmem17	0.309426
Tef	0.309159
Egflam	0.308828
Nuf2	0.308332
Trim46	0.308098
Leng9	0.30806
Cenpe	0.307525
Pdgfrb	0.307148
Coq3	0.307081
Samd9l	0.306471
Ccpg1os	0.306185
Fam101b	0.306028
Khnyn	0.30602
Epm2aip1	0.305959
Coprs	0.305852
Rsrp1	0.305773
Klhl28	0.305449
Tmem86a	0.305344
Ccdc77	0.304347
Fam161a	0.304284
Pdcd5	0.303614
Emp1	0.303123
Slc30a1	0.302818
Slfn9	0.301694
Ankrd50	0.301615
Stard13	0.301246
Endov	0.301071
Ptgir	0.300809
Slc26a11	0.300177
Nkx3-2	0.300173
Mtss1l	0.299848
Adamts4	0.299842
Asl	0.299825
Ccdc8	0.298639
Gclm	0.298551
Eng	0.298122
Gimap9	0.297913
Zxdc	0.297902
Fgf1	0.297024
Armcx5	0.296827
Slc16a9	0.29651
A230050P20Rik	0.296192
Suv39h1	0.295905
Rpap3	0.295884
0610030E20Rik	0.295406
Ephb3	0.295295
Snx11	0.295134
Ifi203	0.29495
Cnnm4	0.294787
Mterf2	0.294634
Flt3l	0.294566
Fam57a	0.294494
Insrr	0.294448
Pex11g	0.293983
Cmc4	0.293414
Rasa4	0.293328
Lrrc47	0.293214
Plk4	0.292815
Mrps31	0.292793
Scarb1	0.29276
Ly6k	0.292321
Crlf3	0.291789
Deptor	0.291785
Atoh8	0.291535
Mgat3	0.291389
Bub1	0.290937
Lrig3	0.290384
Spata7	0.2903
Fra10ac1	0.290057
Csrp1	0.29001
Gpatch1	0.289836
Jph2	0.289645
Slc25a14	0.289472
Oas1a	0.289335
Ccdc22	0.288574
Mxd3	0.288157
Arhgdib	0.287791
Tcirg1	0.287789
Kctd11	0.286962
Poc1a	0.286725
Ngfr	0.286429
Cd59b	0.286278
Mrc2	0.285991
Tfrc	0.285795
F3	0.285657
Cav3	0.285604
Cks2	0.285112
Gbp5	0.285111
Zdhhc24	0.285062
Igtp	0.285015
Tcf4	0.284814
Fastkd3	0.284764
Ermard	0.28453
Spata24	0.284321
Pdcd2l	0.284278
Uap1l1	0.283562
Nrp1	0.28292
Zfyve27	0.282684
Cdc42ep2	0.282675
Cep55	0.282649
Mastl	0.282165
Sugp2	0.281813
Aldh1l2	0.281728
Nsun3	0.281725
Nmb	0.281578
Abhd1	0.281093
Pacrgl	0.280911
Ptprv	0.280902
Ifih1	0.28069
Tbxa2r	0.28066
Zfp51	0.280615
Rgs7bp	0.280244
Bhlhe22	0.280167
Cdk5rap1	0.279699
Pawr	0.279336
Slc19a1	0.279335
Twistnb	0.279265
Xaf1	0.279196
Ppie	0.278778
Prorsd1	0.278513
Mrpl11	0.278416
Tada2b	0.278406
Krt14	0.278316
Ccdc94	0.278147
Socs3	0.278077
Mn1	0.278039
Upk3b	0.277898
Hist1h1c	0.277866
Pid1	0.277663
Arhgap11a	0.277648
Nudt19	0.277351
Arhgef19	0.27651
Tulp1	0.275551
Tmem95	0.275301
Tns3	0.27508
Rabl2	0.274386
Gcnt4	0.274367
Klf11	0.274191
Slc7a2	0.27419
Rfesd	0.273755
Stard10	0.273595
Rhbdf2	0.272853
Myh10	0.272759
Notch1	0.272203
Bloc1s5	0.271903
Plk1	0.271822
Smim24	0.271469
Zbtb34	0.271276
Luzp1	0.271019
Zfp57	0.270793
Slc27a1	0.270718
Bmyc	0.270699
Lipg	0.270577
Mms22l	0.270428
Adamts10	0.270426
Rab3ip	0.269757
Homer3	0.269359
Mpdu1	0.269277
Plcl2	0.269103
Rasl11a	0.268843
Timeless	0.268709
Slc29a3	0.268094
Ccna2	0.2677
Nusap1	0.267636
Tsen2	0.267493
Parp14	0.267444
Atxn7l2	0.267303
Nt5c3b	0.267107
Nav3	0.267085
Nfkbil1	0.26685
Lrrn4	0.265865
Cenpa	0.26531
Prtn3	0.26441
Emilin1	0.264
Ccnb1	0.263828
Lipt2	0.263618
Bola1	0.263349
Ddx31	0.263286
Adcyap1r1	0.262979
Ppp1r35	0.262659
Cacfd1	0.262494
Mllt11	0.262428
Sh2b2	0.262368
Dusp2	0.262224
Mthfr	0.262038
Arglu1	0.261882
Palm3	0.261855
Dact3	0.261337
2310009B15Rik	0.26109
Btbd6	0.260924
Tnn	0.260721
Tpcn1	0.260526
Zc3hav1l	0.260497
Tbc1d24	0.26024
Slco2a1	0.259673
Mrps10	0.259476
Zfp672	0.259324
Tm7sf2	0.258989
Ifit2	0.258583
Agrn	0.258472
A4galt	0.258079
Ccnt2	0.257882
Gpc2	0.257759
Aspn	0.257739
Bcar3	0.257633
Fndc5	0.257036
0610009B22Rik	0.25699
Setbp1	0.256497
Cdkn2b	0.256305
Uxt	0.256282
Abca9	0.256137
Mettl7a1	0.256093
Racgap1	0.256087
B3gnt8	0.255852
Kif23	0.255834
Trim16	0.255675
Nprl3	0.255673
Ypel2	0.25566
Eva1b	0.255591
Irf2bpl	0.25555
Hand2	0.255547
Mfap4	0.255484
Ing4	0.255427
Gstt2	0.255215
Lsm7	0.255185
Skp2	0.25465
Nat14	0.254219
Rab20	0.253948
1810009A15Rik	0.253942
8030462N17Rik	0.25394
Fnbp1	0.253518
Cpsf6	0.253498
Ncapd2	0.253461
Zak	0.253459
Gmds	0.253293
Gemin6	0.253067
Mcm9	0.253001
Slc12a7	0.252476
Zfp688	0.252209
Hmmr	0.252107
Purg	0.251993
Ddx58	0.251616
Mcts2	0.251554
Rbak	0.25144
Tma7	0.251337
Gsap	0.25092
Wdr59	0.250452
Epha4	0.250298
Gjc1	0.250219
Pts	0.25003
Lmo1	0.249879
Ap5s1	0.249676
Tspan4	0.249353
Pdlim2	0.249168
Trpt1	0.248925
Ttk	0.248733
Itga1	0.248653
Tmem47	0.248475
Atat1	0.24843
Dok1	0.248361
Oxld1	0.248254
Fignl2	0.248042
Ppp1r13b	0.247771
Ddx51	0.247286
Ecscr	0.247008
Tmem80	0.246661
Zscan29	0.246655
G2e3	0.246416
Muc1	0.246411
Slfn2	0.246303
Pcdhb3	0.246212
1700066M21Rik	0.246157
H2-Q1	0.245882
Cers4	0.245854
Trp53inp1	0.245781
Zfp68	0.245532
D17H6S53E	0.245502
Bcas3	0.245365
Melk	0.245147
Natd1	0.24436
Plscr2	0.244115
Pola2	0.243711
Igip	0.243587
Tusc1	0.24355
Mnd1	0.242996
Bbs9	0.242764
Cenpi	0.242607
Zfp423	0.242596
Timm9	0.242521
Uros	0.242433
Sap25	0.24241
Dlgap5	0.242355
Hoxb3	0.242242
Spred3	0.242117
Igsf10	0.242097
Spdl1	0.241992
P2rx7	0.241386
Lenep	0.24137
Spag5	0.241276
Myh9	0.240689
Tmem143	0.240504
Pik3r3	0.240289
Leng8	0.240213
Ebf3	0.2402
Zmym6	0.240148
Prim1	0.240122
Il4ra	0.240057
Tgm2	0.239927
Itga11	0.239649
1110008L16Rik	0.239647
4931406P16Rik	0.239433
Mex3a	0.239222
Dcp2	0.23917
Vsir	0.239088
Tmem101	0.238941
Scand1	0.238915
Nt5dc2	0.238567
Col4a1	0.238096
Phf11d	0.237872
Fam174b	0.237292
Top1mt	0.236152
Dram2	0.236132
Dgkq	0.236055
2010111I01Rik	0.236046
Rnf181	0.23585
Vps51	0.235647
Tnnt1	0.23556
Rfc4	0.235422
Alpk1	0.235331
Eda	0.23529
Apobec1	0.235061
Clcn6	0.235033
Orai2	0.234959
Ntrk2	0.234918
Clec11a	0.234885
Sepsecs	0.234732
Lrrc32	0.234718
Hip1	0.234566
Knstrn	0.234506
Arhgef17	0.234036
Neil1	0.233856
Cradd	0.233684
Zfp503	0.233482
Ckap2l	0.233023
Rnf122	0.232872
Zfp715	0.232479
Rdh11	0.232398
Tcf21	0.232278
Rpp38	0.231669
Cped1	0.23141
Cdc42ep1	0.231273
Cygb	0.231235
Msh2	0.230969
Kif22	0.230951
Ankrd39	0.230587
Vegfc	0.230532
Cenpv	0.230517
Ldlr	0.230491
Id1	0.230291
Fubp1	0.229927
Zfp512	0.2295
Fbxl15	0.229485
B4galt7	0.229435
Hic1	0.229074
Fancc	0.229011
Ptger4	0.228998
Zfp322a	0.228912
Grasp	0.228899
Irf2bp1	0.228839
Spc25	0.228797
Limd2	0.228569
Serhl	0.228505
Rbm34	0.228047
C030006K11Rik	0.227984
Zfc3h1	0.227905
Trim27	0.227777
Dcaf17	0.227347
Rdm1	0.227198
Zmat1	0.227028
Lyn	0.226856
Iqce	0.226722
Eif2ak2	0.226637
Fgf11	0.226551
Fam73b	0.226466
Phospho1	0.22622
Rnf185	0.225938
Cpeb1	0.225919
Ackr2	0.225619
Smim4	0.225478
Grik5	0.225217
Mid2	0.225158
Swsap1	0.224435
Grb14	0.224141
Rbmx	0.223891
Paqr4	0.223889
Maml3	0.22381
Vps37d	0.223784
Pitpnm2	0.22375
Stoml1	0.22351
Pcnp	0.22338
Pfkfb2	0.223227
Hoxb6	0.222976
Jak3	0.221904
Hist2h2bb	0.221892
Trim41	0.221764
Dusp4	0.221482
Tbcc	0.221343
Ston1	0.220948
Zfp942	0.220911
Zfp868	0.2209
Mettl2	0.22078
2700081O15Rik	0.220184
Selenbp1	0.219806
Lyar	0.219566
Tmem181a	0.21953
Ntn3	0.219395
Csf2rb2	0.219291
Ccdc58	0.219283
Hoxb5	0.219203
Fzd4	0.219111
Rad51	0.219084
C7	0.219036
Fam122a	0.218972
Prkg1	0.218649
Plekhm3	0.218525
Gpank1	0.218417
Sh3bp5	0.218208
Brpf1	0.218014
Tab1	0.217939
Syce2	0.217609
Cxxc5	0.217535
Zfp280b	0.217403
Pop7	0.217287
Exo5	0.217276
4933427D14Rik	0.217266
Spon1	0.217214
Pald1	0.217195
Papolg	0.216836
Rin2	0.2167
Tiam1	0.21637
Slc7a5	0.216243
Irak2	0.216046
Pold3	0.216017
Pcgf1	0.215802
Znhit3	0.215719
Gfer	0.21563
a	0.215588
Shprh	0.215368
Prrt2	0.215249
Anxa8	0.215214
Kirrel	0.215124
Zfp710	0.214861
Ebpl	0.21471
Mettl1	0.214672
Nt5dc1	0.214424
Parp12	0.214381
Map4k2	0.214232
Rpain	0.214182
Mrpl44	0.214088
Ect2	0.213989
Amd2	0.213762
Hells	0.213745
Rtn4rl2	0.213434
Abca6	0.213421
Tk1	0.21334
Ganc	0.213199
Kif4	0.213181
Lbh	0.213169
Hddc3	0.213048
Oaf	0.212703
Tgfb3	0.212682
Herc6	0.21257
Ndufaf1	0.212286
Xndc1	0.212011
Foxm1	0.211756
Narf	0.211736
Cstf2t	0.211693
Zdhhc12	0.211464
Sh3d21	0.211411
Arhgap20	0.211089
Trim25	0.211003
Tmem194	0.210438
Rmnd5b	0.210262
Cacng7	0.210257
Tspan12	0.210034
Pcnt	0.209944
Tap1	0.209914
Coq7	0.209908
Pus7l	0.20958
Nup43	0.209295
Brf2	0.209271
Olfm1	0.208779
Mpzl2	0.208729
Ocel1	0.208612
Ddx60	0.208601
Ap5z1	0.208509
Dtymk	0.208459
Oasl2	0.208457
AK010878	0.208439
Ephb2	0.208102
Cntrl	0.20801
Sync	0.207936
Zfp369	0.207818
Cep76	0.207594
Miip	0.20741
Elp6	0.207348
Fbxo6	0.207227
Crebzf	0.207116
Tpgs2	0.207107
Zbp1	0.207021
Traf5	0.206646
Gbp7	0.206557
Mbnl1	0.206282
Fap	0.206236
Lrp5	0.206182
Zfp553	0.205854
Pcdhgb2	0.205773
H1f0	0.205374
Rgl1	0.205078
E2f1	0.205043
Agtr1a	0.205018
Hdgfrp3	0.204905
Tspan7	0.204789
Sgcd	0.204678
Socs4	0.204538
Rab33b	0.204385
Adar	0.204304
Tspan6	0.204142
Ipp	0.203893
Strn	0.20369
Klf3	0.203588
Ctdspl2	0.203392
Tor3a	0.20338
Mrpl21	0.203313
Thtpa	0.203296
Pde12	0.203122
Kng1	0.202889
Pigb	0.202877
Hspa12a	0.20287
Mysm1	0.202822
Flywch1	0.20257
Hyls1	0.20242
Parp9	0.20218
Myo18a	0.202062
Eef1e1	0.20199
Usp20	0.201958
Slc39a8	0.201737
Acvr2a	0.201684
Fdps	0.201592
Rcsd1	0.20147
Kcnip3	0.20115
Stx16	0.200904
Spry4	0.200847
Plekha4	0.200709
Hdhd3	0.20061
Pole3	0.200466
Hif1an	0.20045
Chpf2	0.200229
Gins1	0.200082
Bloc1s3	0.200022
Thumpd1	0.199913
Slc29a1	0.199847
Morn4	0.199841
Creb1	0.199711
Primpol	0.199677
Aqp5	0.199594
Smurf1	0.199544
Uba7	0.199509
Ezh2	0.199409
Mat2b	0.199327
1810022K09Rik	0.199186
Mcm3	0.199186
Med20	0.19917
Gcc1	0.199074
Casc4	0.199057
Trim30a	0.198737
Spc24	0.198434
Zfp13	0.198384
Cmtm4	0.1982
Acad8	0.197926
Spred1	0.197845
Syde1	0.197772
Anln	0.19769
Gan	0.197393
Kif3c	0.197175
Gm12942	0.197123
Stx1a	0.197099
Bok	0.197094
Mcm2	0.196883
Zfp422	0.196861
Nr2f2	0.196816
Med22	0.196416
Oard1	0.195925
Galnt15	0.195757
Alkbh7	0.195712
Rem1	0.19565
Klhl24	0.195627
Ccnc	0.195366
Runx1t1	0.195341
Arhgap31	0.195286
Stat1	0.195046
Trim30d	0.195006
Rpp25l	0.194934
Wdr86	0.194782
Astn2	0.194052
Phlda3	0.193905
Fam188b	0.193802
Whamm	0.193477
Ckap2	0.193469
Hs6st1	0.19328
Fblim1	0.192451
Chst2	0.192321
Arhgef40	0.192271
Lrig1	0.19189
Rnf114	0.191841
Mif	0.191837
Slc1a4	0.191373
Gm20604	0.191365
Klhl8	0.191224
Morn2	0.191194
Mical1	0.190702
Rfxank	0.190699
Pcdhb5	0.19063
Asphd2	0.190416
Pdcl	0.190046
Zgpat	0.189978
Ing5	0.189755
Tbc1d25	0.189543
Adamts7	0.189384
Zfp574	0.188944
Gadd45gip1	0.188558
Thbs2	0.188406
Frk	0.188341
Gsc	0.188135
Exoc3l4	0.188025
Mtch1	0.187809
Ttc39b	0.187802
Fads2	0.187737
L3mbtl3	0.187729
Fkrp	0.187704
Aldh1a2	0.187549
Rngtt	0.18752
Fam65c	0.187359
Csf1	0.187315
Pcdhb17	0.187159
Atxn1l	0.187095
Efhc1	0.187012
Exosc5	0.186992
Pcdh18	0.186684
Dtd2	0.186562
Umad1	0.186424
Lrrk1	0.186286
Eif4ebp2	0.185702
Tmem29	0.185482
Mrpl23	0.185358
P4ha3	0.184963
Ccdc84	0.184895
Trappc2l	0.184876
Ip6k2	0.184818
Stom	0.184803
Ptpmt1	0.18469
Zfp260	0.184596
Calcrl	0.1843
Uchl4	0.184203
Dffa	0.184189
Zfp276	0.184106
Gtpbp6	0.183474
Ampd3	0.1834
Cdk19	0.183318
Ttyh3	0.183216
Pigc	0.183197
Zdhhc16	0.182918
Ogfr	0.182615
Atrip	0.182599
Mmgt2	0.182594
Rnf113a2	0.182586
Pcdhb11	0.182581
Prelp	0.182524
Arap1	0.18246
Ethe1	0.182387
Zranb2	0.182071
Helz2	0.18206
Haus3	0.18199
Vmp1	0.181951
Nr3c1	0.181859
Fem1a	0.181772
Rbm12	0.181681
Hhat	0.181569
Mphosph6	0.181356
Fbxl14	0.181236
Fam193b	0.181201
Pdk2	0.181105
Etnk1	0.181099
Cep250	0.180921
Alkbh1	0.180872
Pcsk7	0.180715
Zfp319	0.180534
Prpf39	0.180385
Lancl1	0.18028
Akap7	0.180034
Stard4	0.179934
Mdp1	0.179896
Ahcy	0.179876
Kifc3	0.179772
Ngf	0.179589
Timm8b	0.179403
Ccdc167	0.179289
Tti2	0.179265
Prps1	0.17922
Atp5s	0.178947
Suv420h1	0.178901
Dnlz	0.178746
Cdkn1c	0.178589
Bbip1	0.178474
Lig4	0.178468
Prdx3	0.178428
Ints9	0.178105
Med8	0.178094
Plscr4	0.17809
H2afz	0.178023
Rab13	0.177893
Spns2	0.177843
Lmnb1	0.177686
Mturn	0.177523
Pex1	0.177472
Pcif1	0.177306
Tnfrsf19	0.177265
Tbc1d17	0.177258
Snx21	0.177116
Ctns	0.177013
Taf5	0.177003
Fdxacb1	0.176898
Ogfrl1	0.176855
Zbtb6	0.176854
Mtx3	0.176784
Wdr53	0.176717
Adamts8	0.17671
Parp10	0.176672
Larp1b	0.176113
Nptx2	0.176018
Usp35	0.175869
Coro7	0.175543
Plekha5	0.175503
Ndufa12	0.175495
6030458C11Rik	0.175442
Gsta4	0.175123
Fign	0.175084
Fzd2	0.174995
Rnpc3	0.174947
Zfp14	0.174941
Otud1	0.174929
Ncaph	0.174898
Rnaseh2c	0.174776
Arhgef11	0.174577
Cd68	0.174549
Mapk1ip1	0.17418
Utp23	0.174102
Tspo	0.17388
Snai1	0.173588
Uqcr10	0.173049
St6galnac4	0.172242
Rap2b	0.17193
Cldn15	0.17189
Pdzd2	0.171627
Slc35b3	0.171531
Tbc1d16	0.171418
Wdr45	0.171412
D17H6S56E-5	0.171365
Sdc1	0.171354
Brd8	0.171284
Mmp14	0.171137
Slc30a6	0.171126
Mppe1	0.171088
Prdx6	0.171026
Gab1	0.17097
Rrm1	0.170959
Pigf	0.170831
Tmem179b	0.170493
Pgam1	0.17024
Sp100	0.170104
Slc20a1	0.17004
Ncam1	0.169964
Gadd45a	0.169857
0610007P14Rik	0.169834
Fgd4	0.169805
H2-T23	0.169573
Tmem132a	0.169568
Mllt3	0.169537
Sardh	0.169447
Mylip	0.168655
Htra3	0.168545
H2afy2	0.1685
Drp2	0.16844
Pex3	0.16836
Rhbdd3	0.167955
Luc7l3	0.167661
Cpne8	0.167465
Zfp428	0.167337
Akt3	0.167133
Med14	0.167075
Tcta	0.166983
Drg2	0.166892
Marcksl1	0.166834
Dhcr24	0.16676
Poc1b	0.166583
Def8	0.166511
Psmb8	0.166467
Zfp809	0.166239
Lsm8	0.166189
Atxn3	0.166139
Cutc	0.166087
Mov10	0.166036
Polr3f	0.165828
B4galt3	0.165817
Cbfb	0.165701
Sh3kbp1	0.165696
Cyp4v3	0.165613
Lurap1l	0.165366
Rce1	0.165324
Casp8ap2	0.164974
Nkiras2	0.164953
Caskin2	0.164842
Cyth3	0.164652
Lfng	0.164453
Uhrf1	0.164324
Atp1a2	0.164296
Spsb2	0.164136
Col15a1	0.164134
Terf2ip	0.16409
Rufy3	0.16396
Nhlrc3	0.163899
Fgf10	0.163814
Commd9	0.163578
Timm21	0.163512
Lime1	0.16349
Gnao1	0.16341
Eno1b	0.163234
Pagr1a	0.163043
Tpbg	0.162919
Zfp768	0.162919
Acsf2	0.162871
Btbd3	0.162862
Thap11	0.162708
Zfp593	0.162686
Mill2	0.162596
Rgs4	0.162462
Comtd1	0.16237
2610524H06Rik	0.162366
Brwd1	0.162324
Slirp	0.162263
Tcf19	0.162169
Gba2	0.162167
Dpy19l1	0.162111
Tyk2	0.162041
Fabp5	0.16186
Dgcr8	0.161835
Fzd1	0.161811
Rcc1	0.161788
Tanc1	0.161664
Rad1	0.161551
Dzip3	0.161527
Dis3l	0.161505
Zfp687	0.161499
Lgals3bp	0.161387
Fads1	0.161373
Spryd4	0.161348
Zfp518b	0.161338
Prickle2	0.161328
Nr2c1	0.161152
Rsbn1l	0.161102
Aox1	0.160985
Zfp451	0.160798
Synj2bp-cox16	0.160688
Lpcat2	0.160542
Rab31	0.160537
Casp9	0.160521
Dock6	0.160483
Klhl9	0.160477
Erdr1	0.160356
Sp1	0.160133
Rnf214	0.15998
Snx33	0.159938
Galnt9	0.159774
Bcar1	0.159479
Zfp362	0.159335
Usp40	0.159316
Ctxn1	0.159196
Gsn	0.159112
Sprn	0.159093
Med9	0.159033
Zfp810	0.159006
Sat2	0.158987
Fkbp3	0.158926
Osbp	0.158816
Cda	0.158431
Cebpg	0.158307
Gabbr1	0.158185
Kctd15	0.158148
Megf6	0.158094
Fam206a	0.158029
Cyp4f17	0.158026
Zfp944	0.157947
Nrp2	0.157938
Zfp654	0.157808
Pqbp1	0.157674
Wdr19	0.157666
Mrs2	0.157653
Tst	0.157621
Rpf1	0.157554
Hmgcs1	0.157424
Pxdn	0.157408
Pot1a	0.157338
Zswim4	0.157315
Trmt10c	0.157
Adcy7	0.156788
Endog	0.15673
Rc3h2	0.156597
Dtx4	0.156514
Cep95	0.156473
Igf1r	0.156391
Nbeal1	0.156287
Ppp6r2	0.156145
Ttc26	0.156098
Msi1	0.155872
Stard5	0.155644
Afmid	0.155612
Npepl1	0.155606
Kctd12b	0.155554
Cyp2j9	0.155537
Lama2	0.155501
Parp8	0.155481
Dut	0.155367
Rasa3	0.155361
Sun2	0.155301
Entpd2	0.155214
AI837181	0.155197
Cdpf1	0.155155
Cntfr	0.155154
Hinfp	0.155069
Cdip1	0.155053
Tmem173	0.155045
Pgap3	0.154877
Lmo2	0.154818
BC003965	0.154733
Pdrg1	0.154647
Taf6l	0.154521
Tatdn3	0.154486
Slc36a4	0.154222
Unc119b	0.154139
Ttbk2	0.154109
Yeats4	0.153957
Ppid	0.153852
Phc2	0.15382
Lig3	0.153762
Acsf3	0.153712
Zfp282	0.153704
Slc25a40	0.153697
Sh3pxd2a	0.153659
Tia1	0.153554
Slc20a2	0.153489
Satb1	0.153465
Egr2	0.153282
Rpa1	0.153252
Soat1	0.153077
Guf1	0.15307
Nid2	0.153043
Thap7	0.152977
Nlrx1	0.152903
Ndufab1	0.152898
Tjp1	0.152873
Dennd4b	0.152863
Ntn1	0.152743
Tmem138	0.152709
Znhit2	0.152559
Rfx5	0.152545
Supt3	0.152516
Sec16b	0.152508
Sema6b	0.152348
Cdc42bpg	0.152243
Fam69a	0.152225
Psmb9	0.152094
Dab2	0.152093
Hmcn1	0.152065
Ubtd1	0.152031
Pbk	0.151959
Amer1	0.151816
AI413582	0.151682
Rnf146	0.151654
Mlkl	0.151593
Uspl1	0.151443
Mad2l1bp	0.151395
Mob1b	0.151274
Sox4	0.151143
Rab23	0.150935
Htr2a	0.150746
Zfp27	0.150732
Zfx	0.150724
Adk	0.150718
Cks1b	0.150645
Col6a3	0.15048
Lrfn4	0.150474
Slc52a3	0.150312
Rnf38	0.150174
Stk11ip	0.149989
Zfp629	0.149972
Amotl1	0.149836
Wnt11	0.149765
Slc48a1	0.149764
Tceanc2	0.149698
Zscan21	0.149668
Neurl4	0.149642
Dchs1	0.149581
Abracl	0.149502
Nin	0.149502
Akip1	0.149482
Tspyl4	0.149468
C2cd5	0.149465
Fh1	0.149014
Borcs6	0.149009
Plcg1	0.148949
Stambpl1	0.148878
Gal3st4	0.148704
Zbtb1	0.148695
Mrpl45	0.148676
Adamtsl5	0.148567
Tspan14	0.14854
Brf1	0.148354
Rexo4	0.148004
Marveld1	0.147896
Cep89	0.147891
Galm	0.147737
Gigyf1	0.147703
Ncapg	0.147661
Ngrn	0.147642
Rabggta	0.147411
Fem1c	0.147346
Senp7	0.14716
Dnajc18	0.147118
Ogn	0.147099
Flna	0.146841
Igsf3	0.146794
Dmap1	0.146655
Zbtb25	0.14664
Svil	0.146514
Taf1c	0.146465
Epm2a	0.146399
H2-Q4	0.146233
B230118H07Rik	0.146164
Msx1	0.146157
Narfl	0.146139
Cdkn2c	0.146079
AW551984	0.146048
Cyp2d22	0.145927
Ptprm	0.145883
Prc1	0.145771
Rev1	0.145705
Zfp597	0.145579
Kctd5	0.145531
Bgn	0.145524
Whsc1	0.145415
1810043G02Rik	0.145348
Adamts6	0.145254
Shc1	0.145249
Tmem50a	0.14487
Pskh1	0.1448
Atp11c	0.144678
Pard6a	0.144561
Ick	0.144426
Itpr1	0.144376
Tfpi2	0.144355
Srrm2	0.144201
Phldb2	0.144148
Pspc1	0.144069
Cbll1	0.143999
Plekhn1	0.143975
Fbxo45	0.143629
Sspn	0.143513
Rftn1	0.143494
Mageh1	0.143357
Tpgs1	0.143326
D3Ertd254e	0.14301
Uckl1	0.142966
Acss3	0.142893
Pla2g4a	0.142849
Msl3l2	0.142811
Tmem97	0.142734
Hmbox1	0.142728
Srek1	0.142701
Mob4	0.142397
Fbxo21	0.14233
Rxra	0.142095
Zfp839	0.142063
Alg6	0.141978
Rxrb	0.14195
Slc12a6	0.141608
Mmab	0.141453
Nagpa	0.141424
Mettl24	0.141353
Mrps15	0.141315
Plpp6	0.14123
Invs	0.141182
Nr1h3	0.140943
Zmynd8	0.140928
Tor1aip2	0.140746
Tnrc6b	0.140435
2700094K13Rik	0.140299
Colec12	0.140203
Lca5	0.140119
Pyroxd1	0.140083
Vangl2	0.139915
Slc25a45	0.139851
Haus1	0.139629
Sssca1	0.139588
Dab2ip	0.13944
Mfap3	0.139363
C330027C09Rik	0.139282
Msrb3	0.139224
Zfyve21	0.13893
Gpr88	0.138876
Zfp280d	0.138829
Spag7	0.138807
Zbtb33	0.138574
Arhgef2	0.138539
Hnrnpa0	0.138475
Ubn2	0.138473
Mcrs1	0.138455
Nudt16l1	0.138442
Csgalnact1	0.138183
Smek2	0.138018
Pnpla6	0.137958
Taf9	0.137674
Med7	0.137657
Actb	0.137584
H13	0.137508
Cd274	0.137449
Vma21	0.13738
Hlx	0.137343
Cog2	0.137207
Inha	0.137093
Cenpb	0.137024
Zfp367	0.137012
Nhlrc2	0.136858
Pard6g	0.136682
Robo1	0.136667
Psmb5	0.13654
Hes1	0.136497
Dzip1l	0.136478
Rcn2	0.13646
Rest	0.136235
Fntb	0.136229
Zbtb46	0.136217
Serinc3	0.136212
Ccdc107	0.136207
Cyb5r1	0.136139
Znfx1	0.136072
Anxa3	0.135876
Dhx35	0.135651
Art3	0.135556
Arpp19	0.135535
Brat1	0.135456
Cdkn2a	0.135438
Zfp1	0.135362
Klhl22	0.135322
Ndc1	0.135289
Phip	0.135275
Tshz3	0.13523
Cnn2	0.135226
Atr	0.135153
Nudt22	0.13512
Pgd	0.135049
Gatad2b	0.134992
Cbx5	0.13496
Ccp110	0.13496
Nsun4	0.134931
Zfp653	0.134841
Vwa9	0.134807
Atp5sl	0.134719
Ift80	0.134653
Nbea	0.13456
Prr5	0.134151
Appl2	0.134102
Lss	0.134002
Golga1	0.133918
2210016L21Rik	0.13383
Kat5	0.133785
Wwp2	0.133673
Vash2	0.133532
Mgme1	0.133465
Tubgcp5	0.133354
Ercc2	0.133268
Arl2bp	0.133252
Ier3ip1	0.133214
Stxbp4	0.13313
Podn	0.133076
Cntrob	0.133065
Pigm	0.132994
Olr1	0.132971
Furin	0.132958
Srek1ip1	0.132895
Timm23	0.132849
BC028528	0.132832
Capn5	0.132773
Rnf168	0.132771
Ip6k1	0.132712
Slc15a3	0.132674
Ptbp2	0.132653
Rhobtb3	0.132249
Hook2	0.13209
Golga7	0.132023
Lrif1	0.131791
Dennd4a	0.131613
C1d	0.131559
Gins4	0.131491
Luc7l	0.131465
Kctd18	0.13144
Sf3b4	0.131327
Kmt2d	0.131307
Baz2a	0.131281
Ints7	0.131075
Ptcd1	0.131047
Gmppb	0.131009
Ak1	0.130904
Zfp280c	0.130884
Ccdc186	0.13074
Arrb1	0.130473
Trim39	0.13039
Slc35a3	0.130378
Rmdn1	0.130322
Kctd2	0.130284
Wdr37	0.130176
Mrpl15	0.130175
Kcp	0.13014
Ubxn7	0.130078
Srebf2	0.129876
Wisp1	0.129839
Pwwp2a	0.129801
Bahcc1	0.129786
Dennd3	0.129733
Kcnd1	0.129709
Kctd17	0.129585
Sc5d	0.129547
Gemin2	0.129528
Stmn1	0.129512
Dock11	0.129505
Rnf115	0.129497
Cdk13	0.129492
B4galt2	0.129437
Ankzf1	0.129363
Gnb4	0.12934
Mllt6	0.129337
Pex2	0.129268
Tln2	0.129264
Fam58b	0.129213
Prr15	0.129121
Zfp414	0.129103
Tmco6	0.128998
Dusp12	0.12893
Chchd1	0.128926
Ppih	0.128884
Plekhg5	0.12888
Mnat1	0.128862
Klhl36	0.128861
Pus3	0.128832
Itsn1	0.128764
Def6	0.12873
Cplx2	0.128677
Alkbh8	0.128642
Top2a	0.128445
Gpr161	0.128241
BC030336	0.128217
Ncoa3	0.128188
Rab29	0.128171
Mplkip	0.128163
Eid1	0.128129
Smndc1	0.128049
Mmd	0.128026
Eefsec	0.127997
Asic3	0.127943
Dpep1	0.127934
Camk2n1	0.127771
Pi16	0.127653
Mospd1	0.127653
Lyrm2	0.127573
Eral1	0.127535
Isg20l2	0.127432
Phax	0.127392
Ccdc71	0.127239
Isg20	0.126951
Gucd1	0.126845
Nck2	0.126713
Smad6	0.126557
Actl6a	0.126452
Matn2	0.126415
Supt7l	0.126357
Vcpkmt	0.126229
Urod	0.126162
Zbtb17	0.126162
Tsr3	0.126057
Gsr	0.126055
Alg14	0.125896
Zcchc10	0.125804
Eif4ebp1	0.125659
Pygo2	0.125548
Hoxc4	0.125526
Kctd12	0.12537
Rheb	0.125301
Mapk8ip3	0.125203
Cyc1	0.125197
Pdcd10	0.125143
Tmem55a	0.125082
Zfp266	0.125081
Nhej1	0.125056
Fastk	0.125023
Srsf1	0.124874
Runx2	0.12474
Shmt2	0.124686
Wdpcp	0.124622
Ppp1r9b	0.124613
Irs1	0.124574
Blzf1	0.124416
Bap1	0.124188
Med16	0.124
Rictor	0.123944
Ccdc3	0.123908
Rnf135	0.123871
Gtf3a	0.123772
Fzd8	0.123699
Qtrt1	0.123696
Tlr3	0.123632
Gtf2h4	0.12357
Vps37b	0.123536
Ccnb2	0.123525
Casp2	0.12342
Tmem140	0.123362
Polr3d	0.123358
Shf	0.123356
Tspyl1	0.123347
Hace1	0.123346
Map3k14	0.123337
Pet100	0.123328
Kcnb1	0.123238
Ss18	0.123215
Zfp334	0.123126
Hdac10	0.123062
Gcat	0.123022
Slc22a18	0.122923
Fam234b	0.122903
Pole4	0.122869
Gpsm3	0.122821
Cmtr1	0.122805
Slc22a15	0.122766
Slc17a5	0.122637
Vti1a	0.122558
Ttf2	0.122528
Scrib	0.122503
Ptger1	0.122483
Lsm3	0.122469
Bbx	0.122366
Ebp	0.122291
Fance	0.122287
Tbl3	0.122174
4921524J17Rik	0.121921
Mier2	0.12192
Chsy1	0.121907
Esam	0.121661
Mvk	0.121514
Eda2r	0.121502
Amotl2	0.121417
Rassf1	0.121283
[truncated: 8,414 more rows]
