# Supplementary material for: Squamous trans-differentiation of pancreatic cancer cells promotes stromal inflammation
Source: eLife. 2020 Apr 24;9:e53381. doi: 10.7554/eLife.53381 (PMC7200154; doi:10.7554/eLife.53381)
Supplement: Supplementary file 5. — Tab-1 (Mouse RT-qPCR primers): List of mouse RT-qPCR primer sequences used in this study. Tab-2 (Human RT-qPCR primers): List of human RT-qPCR primer sequences used in this study. Tab-3 (sgRNAs): List of sgRNA sequences used in this study. [file elife-53381-supp5.xlsx]

## Sheet: Mouse RT-qPCR primers
Target Gene	RT-qPCR Primer	Sequence
Gapdh	Fwd	TTCACCACCATGGAGAAGGC
	Rev	CCCTTTTGGCTCCACCCT
Il6	Fwd	CTTCCATCCAGTTGCCTTCT
	Rev	CTCCGACTTGTGAAGTGGTATAG
Cxcl1	Fwd	GTGTCAACCACTGTGCTAGT
	Rev	CACACATGTCCTCACCCTAATAC
Lif	Fwd	CTGCTCTCCCTCTTTCCTTTC
	Rev	ACATTCCCACAGGGTACATTC
Acta2	Fwd	CCATCATGCGTCTGGACTT
	Rev	GGCAGTAGTCACGAAGGAATAG
Ctgf	Fwd	ACCTGTGCCTGCCATTAC
	Rev	GTCCCTTACTTCCTGGCTTTAC
Krt5	Fwd	CAACAAGTTTGCCTCCTTCATC
	Rev	CGGATCCAGGTTCTGCTTTAT
Krt6a	Fwd	GGACAGCATCATTGGAGAGAG
	Rev	GCTGTGCGCTTGTTGATTT
S100a2	Fwd	GAGAGGCTCAAACACAACAAAG
	Rev	CTGCTGGTCACTGTCCTTATC
Il1a	Fwd	ATGCCAGTTGAGTAGGATAAAGG
	Rev	ACCCACTGAGGTAGGAAAGA

## Sheet: Human RT-qPCR primers
Target Gene	RT-qPCR Primer	Sequence
GAPDH	Fwd	CCTGACCTGCCGTCTAGAAA
	Rev	CTCCGACGCCTGCTTCAC
TP63	Fwd	AATCCTGGAGCCAGAAGAAAG
	Rev	CACTAAATTGAGTCTGGGCATTG
TAp63	Fwd	CCCAGAGCACACAGACAAA
	Rev	TCAATGGGCTGAACTGAACATA
IL6	Fwd	GGAGACTTGCCTGGTGAAA
	Rev	CTGGCTTGTTCCTCACTACTC
CXCL1	Fwd	GGAACAGAAGAGGAAAGAGAGAC
	Rev	TCTCCTAAGCGATGCTCAAAC
LIF	Fwd	ATAGGGAGGGAGCTAGAAGAAG
	Rev	GGCCAAAGGGACAAGTAGAG
ACTA2	Fwd	CGGGACATCAAGGAGAAACT
	Rev	CCATCAGGCAACTCGTAACT
CTGF	Fwd	CCCAGACACTGGTTTGAAGAA
	Rev	GCTCCTAAAGCCACACCTTAATA
IL1A	Fwd	CATCCTCCACAATAGCAGACAG
	Rev	GAGTTTCCTGGCTATGGGATAAG
IL1B	Fwd	ATGGACAAGCTGAGGAAGATG
	Rev	CCCATGTGTCGAAGAAGATAGG
S100A2	Fwd	CTGGATGAGAACAGTGACCAG
	Rev	CAGCCCTGGAAGAAGTCATT

## Sheet: sgRNAs
sgRNA name	Target DNA sequence
sgNEG	AGTCGCTTCTCGATTATGGG
sgRPA3	GATGAATTGAGCTAGCATGC
sgTP63#2	GCACCGCCAAGTCGGCCACC
sgTP63#4	AAAAGCTGAGCACGTCACGG
sgE1	GGACGAGTCTATCCTAGCAT
sgE2	TTTGTACGTGGTACTTGCCG
sgE3	TGGTGAGGTCTAAAGACGTT
sgE4	GATGAGCATCTATGGAATGC
sgE5	ATGGCACAGTCCATGAGCTC
