# Supplementary figures and images for: Squamous trans-differentiation of pancreatic cancer cells promotes stromal inflammation
Source: eLife journal article supplement (doi:10.7554/elife.53381), 2020-04-24

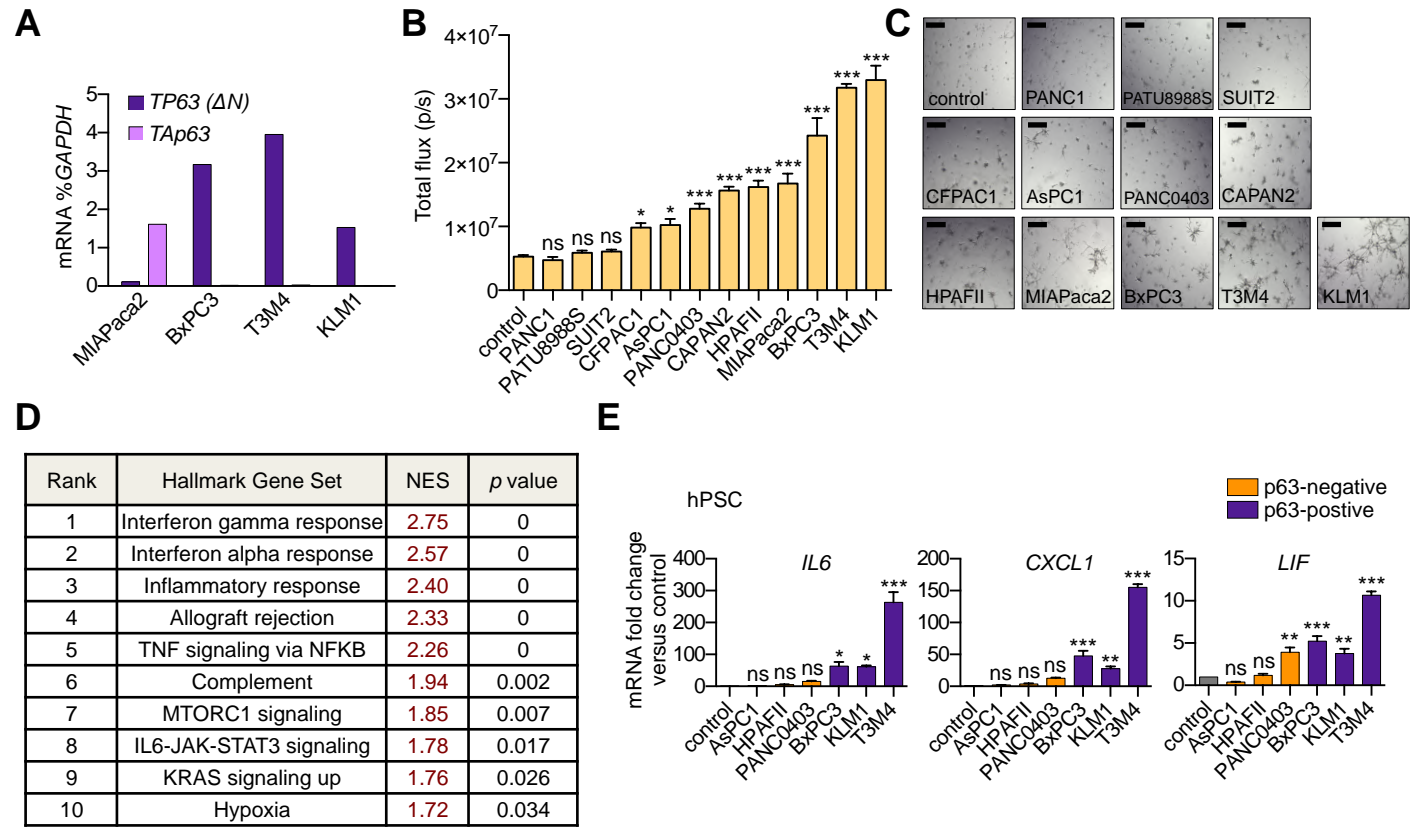

Figure 1-figure supplement 1

Supplement: supp [file elife-53381-supp-v1.zip]

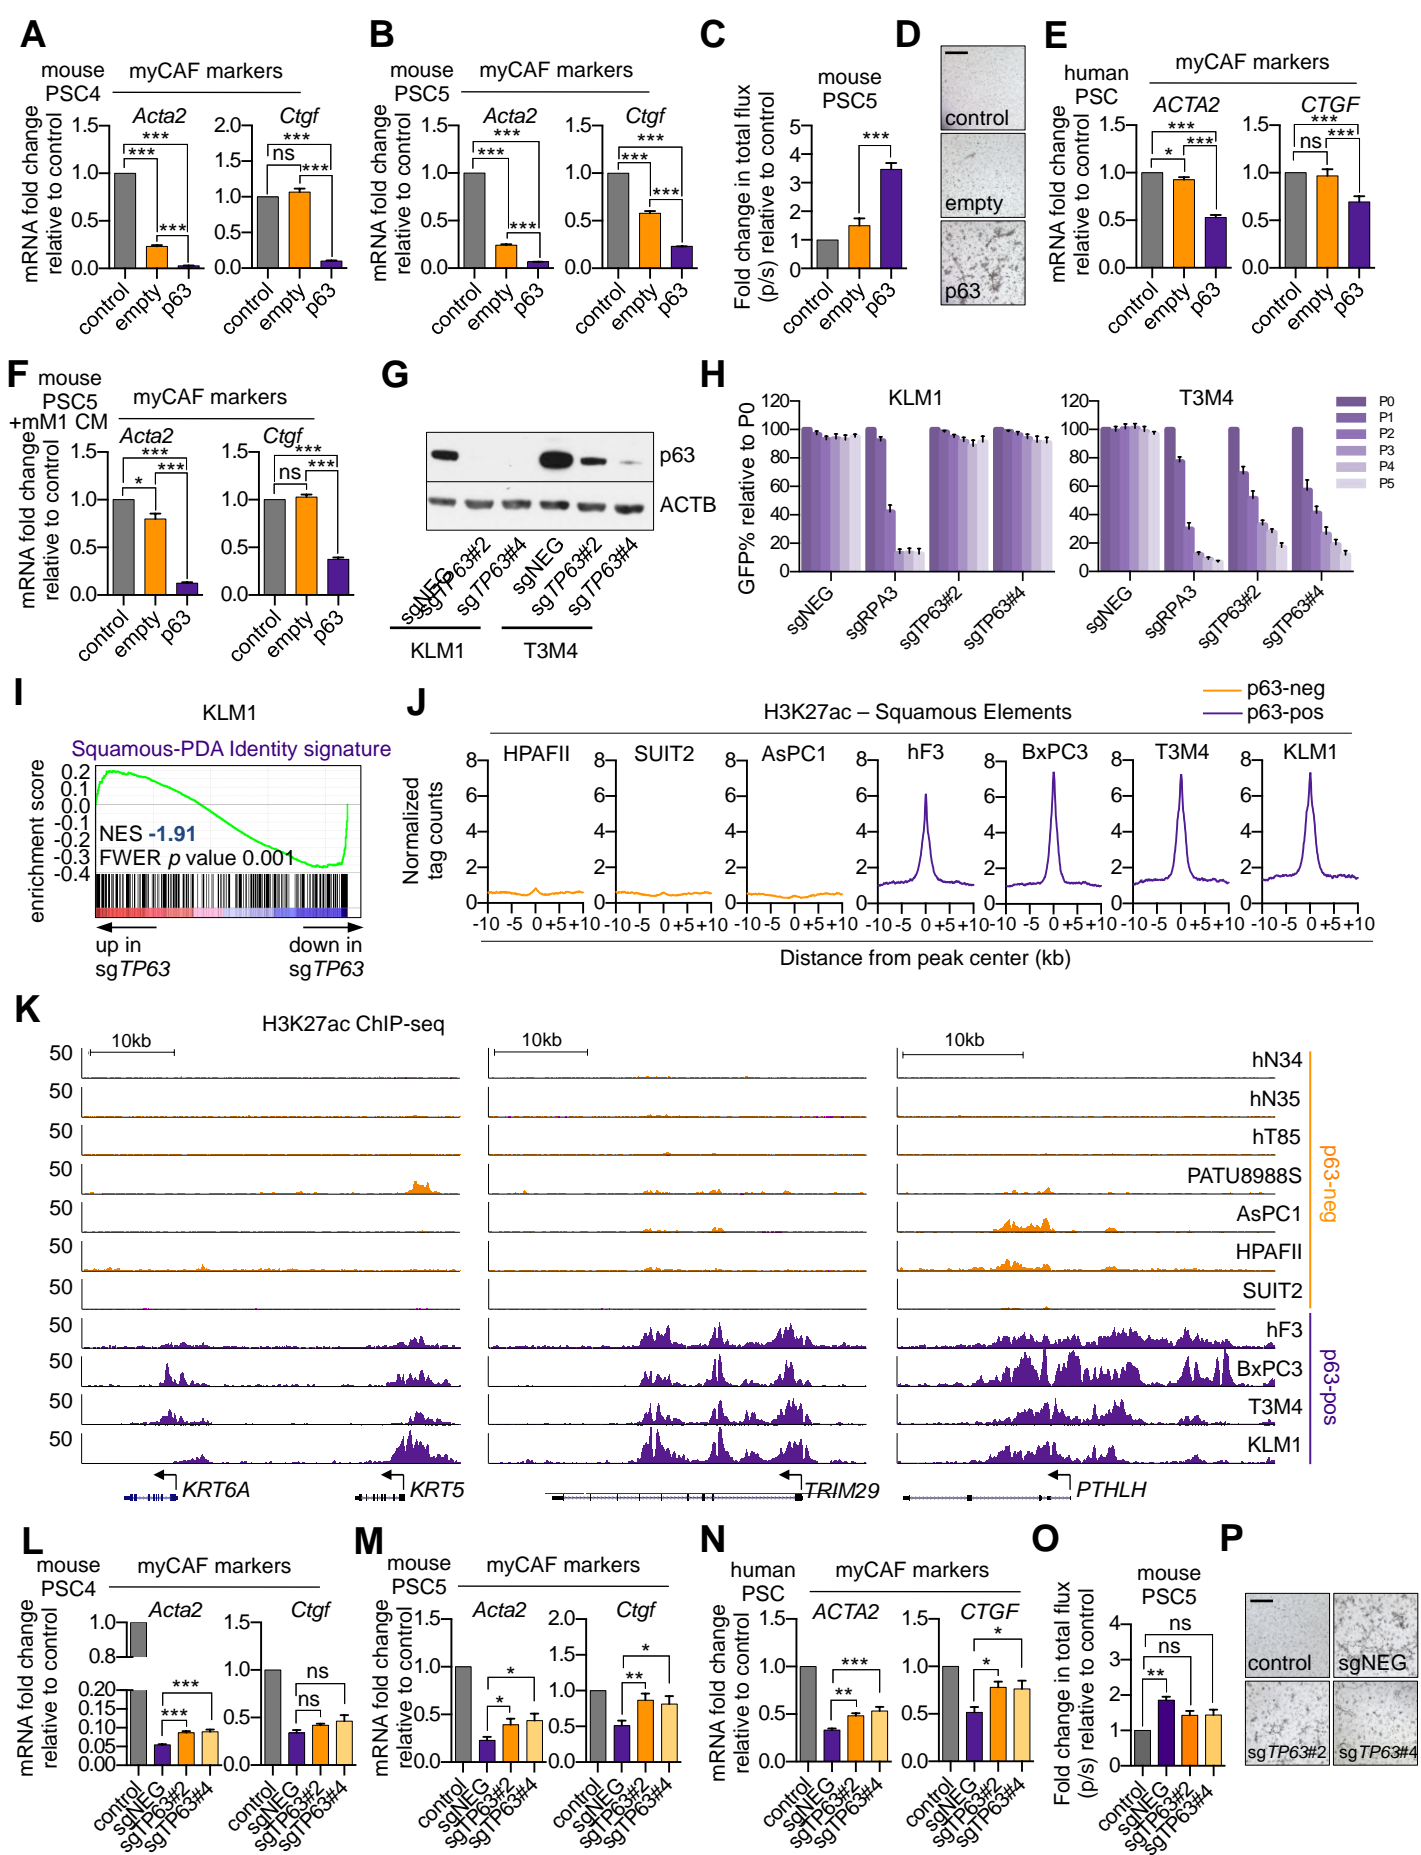

Figure 2-figure supplement 1

Supplement: supp [file elife-53381-supp-v1.zip]

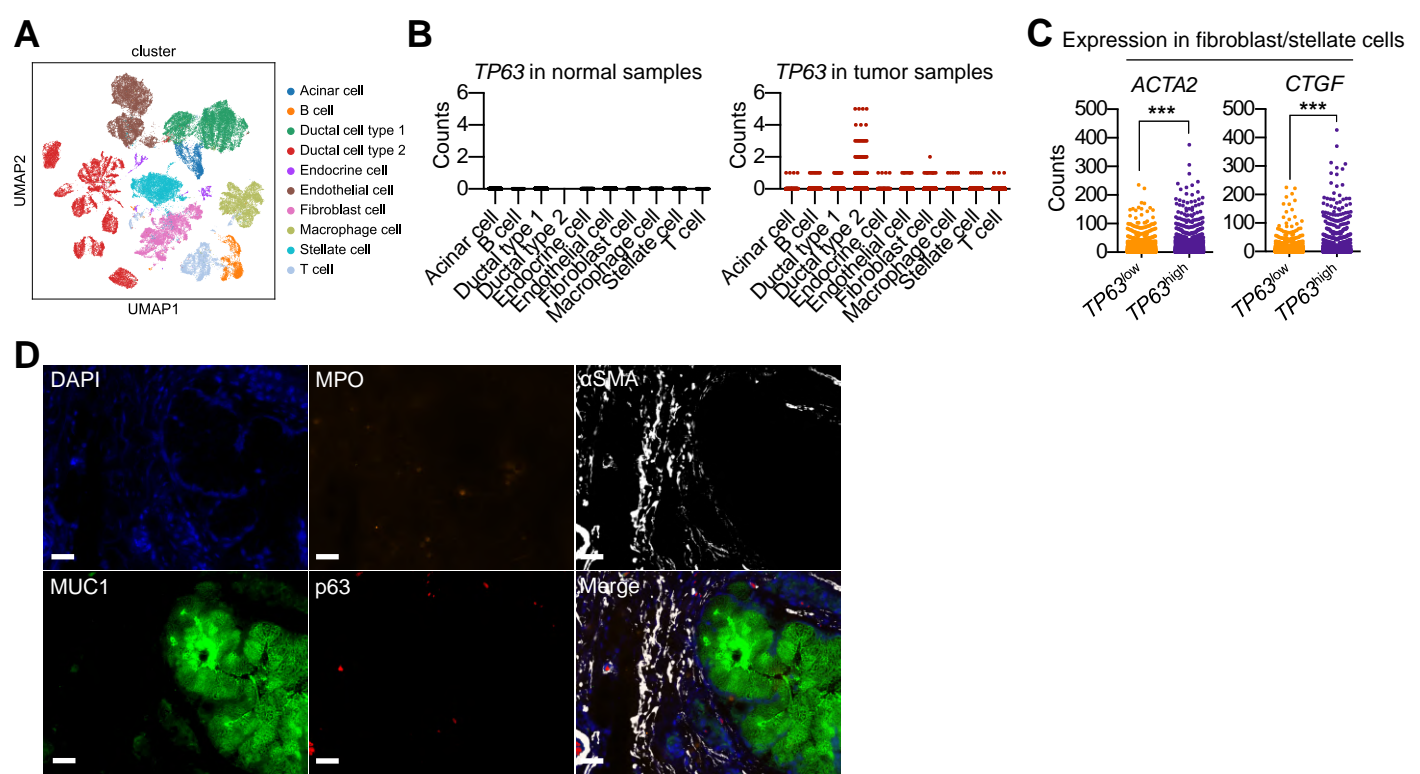

Figure 6-figure supplement 1

Supplement: supp [file elife-53381-supp-v1.zip]

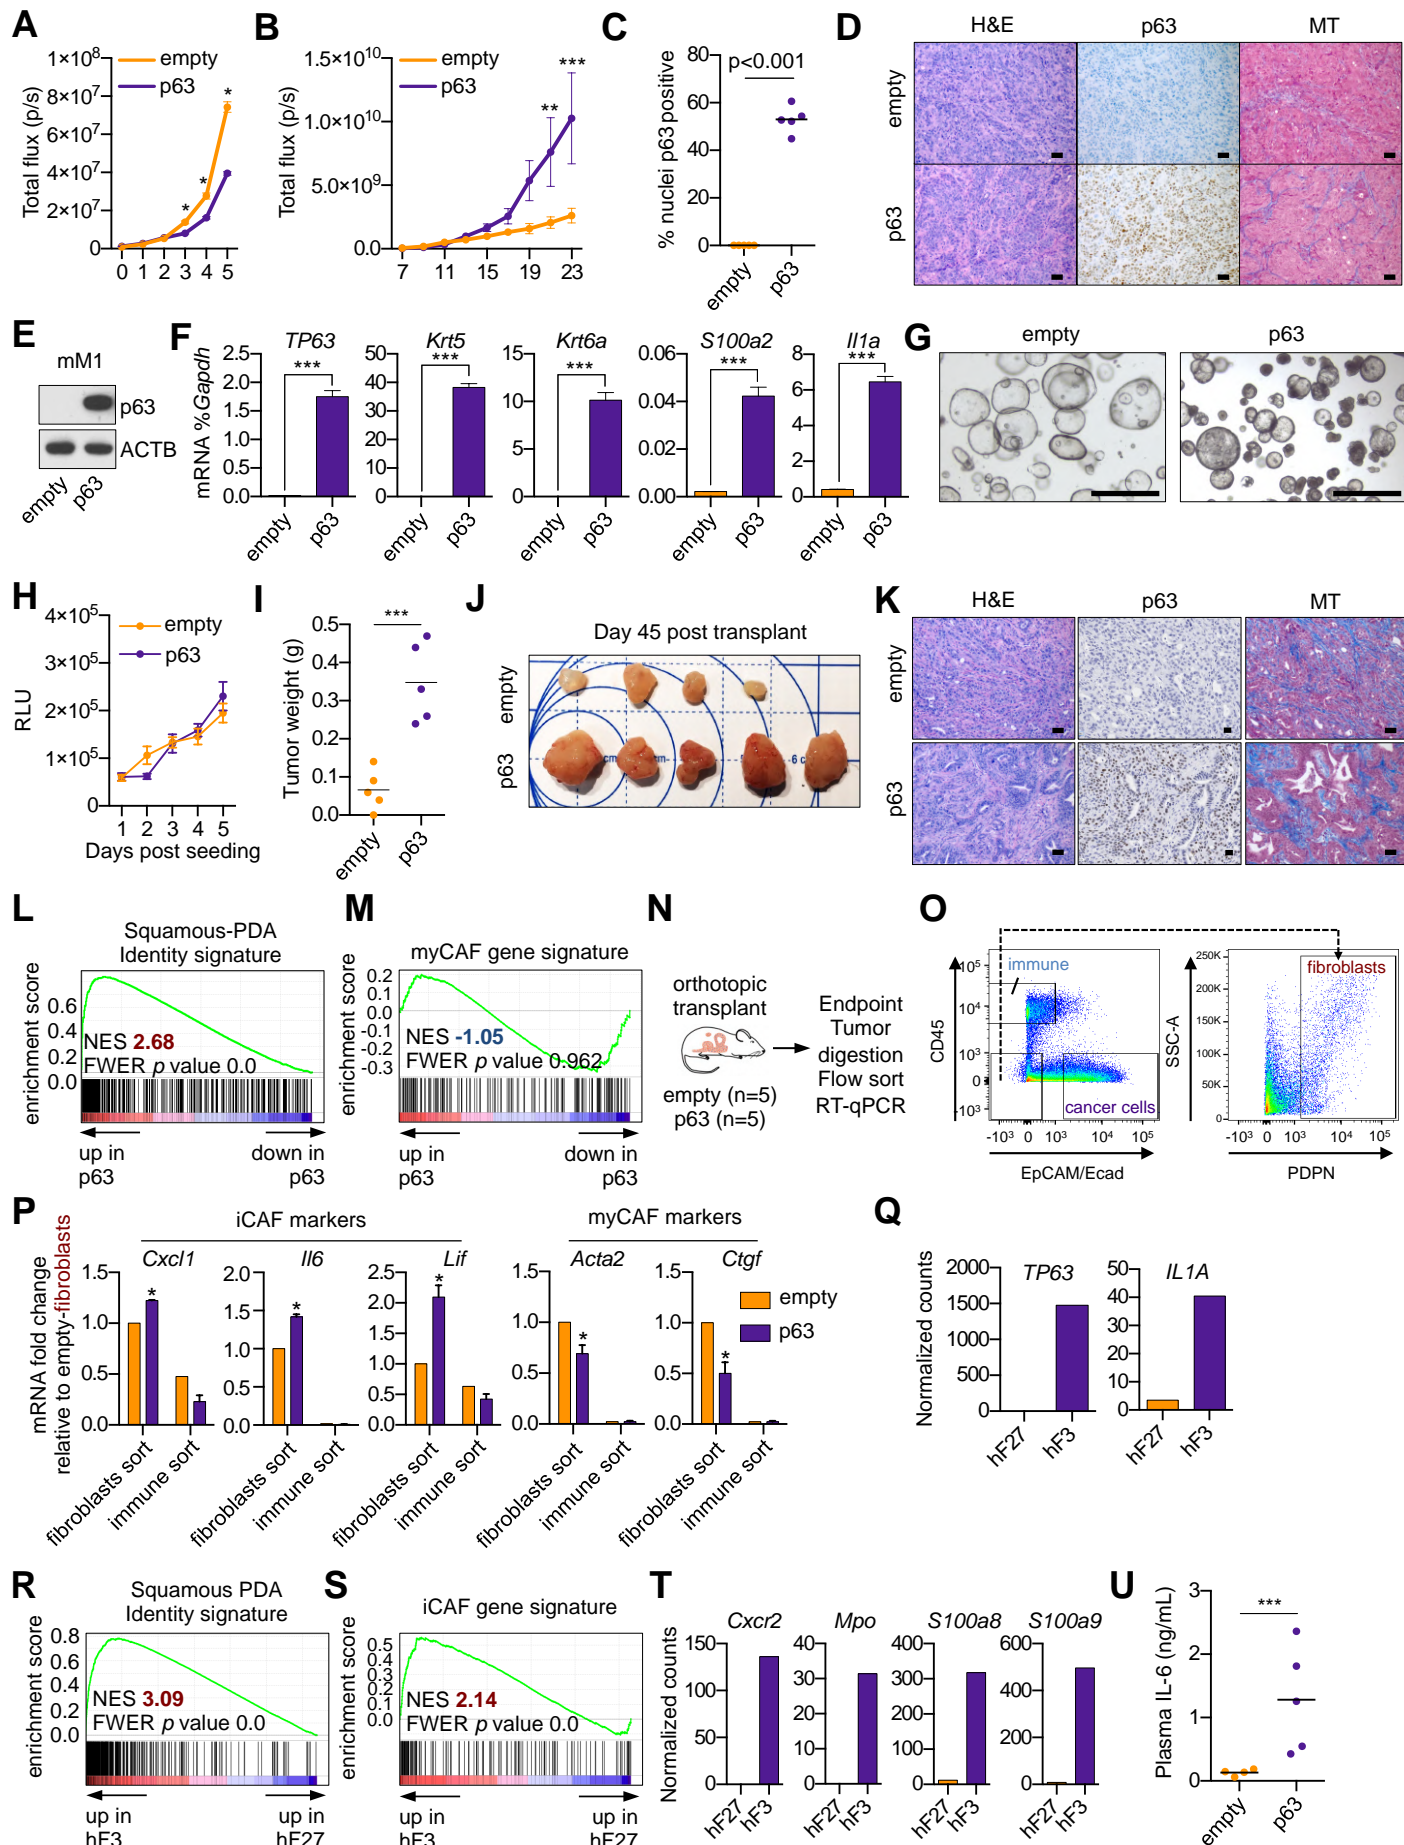

Figure 3-figure supplement 1

Supplement: supp [file elife-53381-supp-v1.zip]

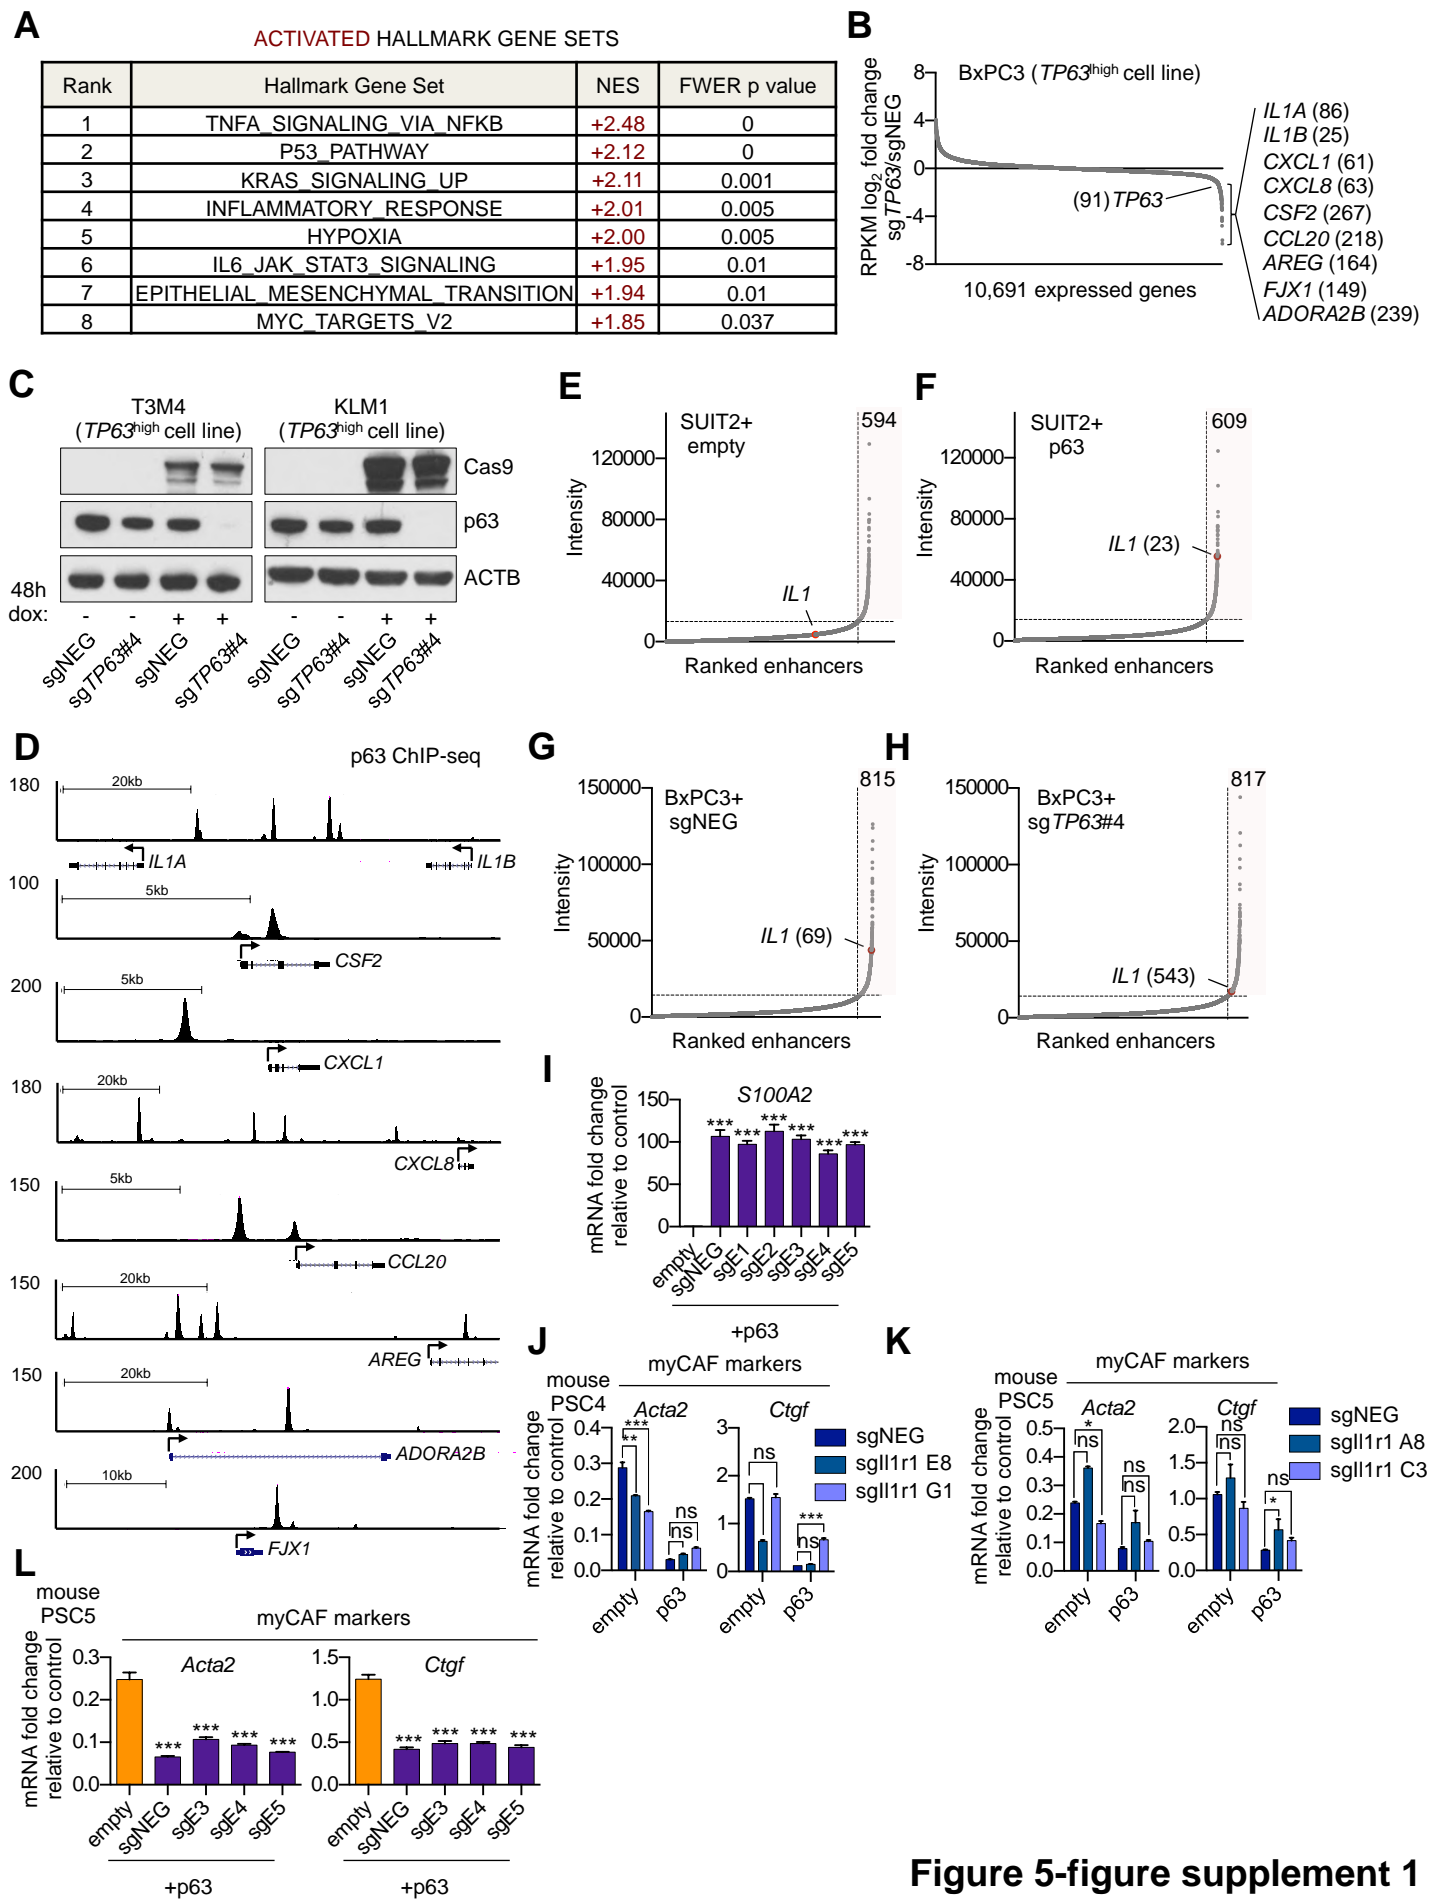

Figure 5-figure supplement 1

Supplement: supp [file elife-53381-supp-v1.zip]
